# Supplementary material for: Single-cell transcriptomic analysis elucidates APOE genotype specific changes across cell types in two brain regions in Alzheimer’s disease
Source: Research Square preprint supplement (doi:10.21203/rs.3.rs-291648/v1), 2021-03-15
Supplement: Supplementary file 2 [file cad4cbaffed002a58a41a0f7.xlsx]

## Sheet: Supplementary Table 6
Supplementary Table 6: Enriched disease pathways in APOE3/3 cells in the Prefrontal cortex
source	term_name	term_id	adjusted_p_value	negative_log10_of_adjusted_p_value	term_size	query_size	intersection_size	effective_domain_size	intersections	group		source	term_name	term_id	adjusted_p_value	negative_log10_of_adjusted_p_value	term_size	query_size	intersection_size	effective_domain_size	intersections	group
GO:CC	inclusion body	GO:0016234	0.00547789	2.26139	80	14	3	18956	CLU,PSAP,PRNP	Ast_3/3_up		GO:MF	glutamate:sodium symporter activity	GO:0015501	0.00082353	3.08432	4	23	2	18602	SLC1A3,SLC1A2	Ast_3/3_down
GO:CC	axon	GO:0030424	0.00822963	2.08462	658	14	5	18956	PRNP,DST,ADGRL3,HSP90AA1,DLG2	Ast_3/3_up		GO:MF	high-affinity glutamate transmembrane transporter activity	GO:0005314	0.00082353	3.08432	4	23	2	18602	SLC1A3,SLC1A2	Ast_3/3_down
GO:MF	glutamate receptor activity	GO:0008066	7.18902e-05	4.14333	27	169	6	18602	GRIN1,GRIK1,GRM3,GRID2,GRIA4,GRM5	Ex_3/3_up		GO:MF	sodium:dicarboxylate symporter activity	GO:0017153	0.00191724	2.71732	7	23	2	18602	SLC1A3,SLC1A2	Ast_3/3_down
GO:MF	cyclic-nucleotide phosphodiesterase activity	GO:0004112	0.0016053	2.79444	29	169	5	18602	CNP,PDE8A,PDE1C,PDE1A,PDE4B	Ex_3/3_up		GO:MF	inorganic cation transmembrane transporter activity	GO:0022890	0.00250312	2.60152	600	23	6	18602	SLC1A3,SLC1A2,ITPR2,KCNIP4,GRIA2,FAM155A	Ast_3/3_down
GO:MF	ionotropic glutamate receptor activity	GO:0004970	0.00422272	2.37441	19	169	4	18602	GRIN1,GRIK1,GRID2,GRIA4	Ex_3/3_up		GO:MF	transporter activity	GO:0005215	0.00250312	2.60152	1230	23	8	18602	APOE,SLC1A3,SLC1A2,ITPR2,KCNIP4,GRIA2,FAM155A,PITPNC1	Ast_3/3_down
GO:MF	amyloid-beta binding	GO:0001540	0.00903288	2.04417	76	169	6	18602	GRIN1,APOE,CRYAB,CLU,PRNP,GRIA4	Ex_3/3_up		GO:MF	ferric iron binding	GO:0008199	0.00250312	2.60152	11	23	2	18602	FTH1,FTL	Ast_3/3_down
GO:MF	3',5'-cyclic-nucleotide phosphodiesterase activity	GO:0004114	0.00903288	2.04417	27	169	4	18602	PDE8A,PDE1C,PDE1A,PDE4B	Ex_3/3_up		GO:MF	cation transmembrane transporter activity	GO:0008324	0.00280184	2.55256	646	23	6	18602	SLC1A3,SLC1A2,ITPR2,KCNIP4,GRIA2,FAM155A	Ast_3/3_down
GO:MF	structural constituent of myelin sheath	GO:0019911	0.00903288	2.04417	10	169	3	18602	PLP1,MOBP,MBP	Ex_3/3_up		GO:MF	amino acid:sodium symporter activity	GO:0005283	0.00296773	2.52758	15	23	2	18602	SLC1A3,SLC1A2	Ast_3/3_down
GO:BP	nervous system development	GO:0007399	1.37546e-11	10.8616	2483	169	64	18017	DHFR,LINGO1,PLP1,SPP1,GRIN1,SLC1A3,APOE,RELN,ZNF536,MOBP,CNP,DOCK10,B2M,CLMN,QKI,NFIA,PCDH15,CLDN11,ALCAM,ABCA2,ERBB4,ADGRV1,GRIK1,SLC1A2,DLC1,SGK1,SHTN1,MBP,CAMK2B,LAMA2,MAN2A1,ZEB2,FRYL,CBLN2,NCAM2,TCF12,ASTN2,UNC5C,ROBO1,NRG1,CLU,GAB1,MEF2A,CNTN5,ZSWIM6,MBNL1,ROBO2,MAP4K4,PTPRK,FAIM2,TNR,GRID2,NEGR1,ADGRL3,SPOCK1,NDRG4,DMD,TCF4,PTPRD,NRG3,APLP1,DCC,LSAMP,KIRREL3	Ex_3/3_up		GO:MF	L-glutamate transmembrane transporter activity	GO:0005313	0.00296773	2.52758	14	23	2	18602	SLC1A3,SLC1A2	Ast_3/3_down
GO:BP	neurogenesis	GO:0022008	4.77261e-11	10.3212	1710	169	51	18017	DHFR,LINGO1,PLP1,SPP1,GRIN1,SLC1A3,APOE,RELN,ZNF536,CNP,DOCK10,B2M,CLMN,PCDH15,ALCAM,ABCA2,ERBB4,ADGRV1,SGK1,SHTN1,CAMK2B,LAMA2,MAN2A1,ZEB2,FRYL,NCAM2,TCF12,ASTN2,UNC5C,ROBO1,NRG1,CLU,GAB1,MEF2A,ZSWIM6,ROBO2,MAP4K4,PTPRK,FAIM2,TNR,GRID2,NEGR1,ADGRL3,SPOCK1,NDRG4,DMD,TCF4,PTPRD,NRG3,DCC,KIRREL3	Ex_3/3_up		GO:MF	metal ion transmembrane transporter activity	GO:0046873	0.00296773	2.52758	439	23	5	18602	SLC1A3,SLC1A2,ITPR2,KCNIP4,FAM155A	Ast_3/3_down
GO:BP	generation of neurons	GO:0048699	4.98658e-11	10.3022	1605	169	49	18017	DHFR,LINGO1,PLP1,SPP1,GRIN1,SLC1A3,APOE,RELN,ZNF536,CNP,DOCK10,B2M,CLMN,PCDH15,ALCAM,ERBB4,ADGRV1,SGK1,SHTN1,CAMK2B,LAMA2,MAN2A1,ZEB2,FRYL,NCAM2,TCF12,ASTN2,UNC5C,ROBO1,NRG1,GAB1,MEF2A,ZSWIM6,ROBO2,MAP4K4,PTPRK,FAIM2,TNR,GRID2,NEGR1,ADGRL3,SPOCK1,NDRG4,DMD,TCF4,PTPRD,NRG3,DCC,KIRREL3	Ex_3/3_up		GO:MF	acidic amino acid transmembrane transporter activity	GO:0015172	0.00296773	2.52758	16	23	2	18602	SLC1A3,SLC1A2	Ast_3/3_down
GO:BP	neuron projection development	GO:0031175	1.80567e-10	9.74336	1030	169	38	18017	DHFR,LINGO1,PLP1,SPP1,GRIN1,APOE,RELN,CNP,DOCK10,B2M,CLMN,PCDH15,ALCAM,ADGRV1,SGK1,SHTN1,CAMK2B,LAMA2,ZEB2,FRYL,NCAM2,UNC5C,ROBO1,GAB1,MEF2A,ZSWIM6,ROBO2,MAP4K4,PTPRK,TNR,GRID2,NEGR1,SPOCK1,NDRG4,DMD,PTPRD,DCC,KIRREL3	Ex_3/3_up		GO:MF	amino acid:cation symporter activity	GO:0005416	0.00386786	2.41253	19	23	2	18602	SLC1A3,SLC1A2	Ast_3/3_down
GO:BP	neuron differentiation	GO:0030182	1.83535e-10	9.73628	1437	169	45	18017	DHFR,LINGO1,PLP1,SPP1,GRIN1,SLC1A3,APOE,RELN,ZNF536,CNP,DOCK10,B2M,CLMN,PCDH15,ALCAM,ERBB4,ADGRV1,SGK1,SHTN1,CAMK2B,LAMA2,ZEB2,FRYL,NCAM2,TCF12,UNC5C,ROBO1,NRG1,GAB1,MEF2A,ZSWIM6,ROBO2,MAP4K4,PTPRK,FAIM2,TNR,GRID2,NEGR1,SPOCK1,NDRG4,DMD,TCF4,PTPRD,DCC,KIRREL3	Ex_3/3_up		GO:MF	inorganic molecular entity transmembrane transporter activity	GO:0015318	0.00566605	2.24672	828	23	6	18602	SLC1A3,SLC1A2,ITPR2,KCNIP4,GRIA2,FAM155A	Ast_3/3_down
GO:BP	cell development	GO:0048468	8.85191e-10	9.05296	2237	169	56	18017	DHFR,SLC26A3,LINGO1,PLP1,SPP1,GRIN1,SLC1A3,APOE,RELN,ZNF536,DOCK5,CNP,DOCK10,B2M,CLMN,QKI,CHST11,PCDH15,ALCAM,ABCA2,ERBB4,ADGRV1,PIP4K2A,SGK1,SGCZ,SHTN1,CAMK2B,LAMA2,MAN2A1,ZEB2,FRYL,NCAM2,TMEFF2,TCF12,UNC5C,ROBO1,NRG1,CLU,GAB1,MEF2A,ZSWIM6,ROBO2,MAP4K4,PTPRK,TNR,GRID2,NEGR1,TJP1,SPOCK1,NDRG4,DMD,TCF4,PTPRD,NRG3,DCC,KIRREL3	Ex_3/3_up		GO:MF	ion channel regulator activity	GO:0099106	0.00566605	2.24672	120	23	3	18602	NRXN1,GRM3,KCNIP4	Ast_3/3_down
GO:BP	neuron development	GO:0048666	1.03488e-09	8.98511	1167	169	39	18017	DHFR,LINGO1,PLP1,SPP1,GRIN1,SLC1A3,APOE,RELN,CNP,DOCK10,B2M,CLMN,PCDH15,ALCAM,ADGRV1,SGK1,SHTN1,CAMK2B,LAMA2,ZEB2,FRYL,NCAM2,UNC5C,ROBO1,GAB1,MEF2A,ZSWIM6,ROBO2,MAP4K4,PTPRK,TNR,GRID2,NEGR1,SPOCK1,NDRG4,DMD,PTPRD,DCC,KIRREL3	Ex_3/3_up		GO:MF	ferrous iron binding	GO:0008198	0.00585007	2.23284	26	23	2	18602	FTH1,FTL	Ast_3/3_down
GO:BP	cell junction organization	GO:0034330	1.26228e-09	8.89884	703	169	30	18017	GRIN1,APOE,RELN,DOCK10,NFIA,CDH20,CLDN11,ERBB4,DLC1,CAMK2B,CBLN2,NRG1,CNTN5,PRNP,ROBO2,MAP4K4,CADM1,PTPRK,CDH12,TNR,GRID2,ADGRL3,LRRTM4,TJP1,CADM2,PTPRD,DLG2,GRM5,DST,KIRREL3	Ex_3/3_up		GO:MF	glutamate receptor activity	GO:0008066	0.00591874	2.22777	27	23	2	18602	GRM3,GRIA2	Ast_3/3_down
GO:BP	cell morphogenesis	GO:0000902	1.81437e-08	7.74128	1058	169	35	18017	LINGO1,SPP1,GRIN1,SLC1A3,APOE,RELN,DOCK5,CNP,DOCK10,CDH20,PCDH15,ALCAM,DLC1,SGK1,SHTN1,CAMK2B,LAMA2,ZEB2,FRYL,TMEFF2,UNC5C,ROBO1,NRG1,CLU,GAB1,MEF2A,ZSWIM6,ROBO2,MAP4K4,CDH12,TNR,DMD,PTPRD,DCC,KIRREL3	Ex_3/3_up		GO:MF	ion transmembrane transporter activity	GO:0015075	0.00633709	2.19811	885	23	6	18602	SLC1A3,SLC1A2,ITPR2,KCNIP4,GRIA2,FAM155A	Ast_3/3_down
GO:BP	cell adhesion	GO:0007155	2.11596e-07	6.67449	1475	169	40	18017	SPP1,APBB1IP,RELN,DOCK8,DOCK5,CDH20,PCDH15,CLDN11,ALCAM,ADGRV1,DLC1,EDIL3,MBP,LAMA2,NCAM2,TMEFF2,CTNNA3,ASTN2,ROBO1,CNTN5,PRNP,ROBO2,MAP4K4,CADM1,PTPRK,CDH12,TNR,GRID2,NEGR1,ADGRL3,TJP1,SPOCK1,DMD,CADM2,PTPRD,DLG2,APLP1,DST,LSAMP,KIRREL3	Ex_3/3_up		GO:MF	organic acid:sodium symporter activity	GO:0005343	0.00650548	2.18672	30	23	2	18602	SLC1A3,SLC1A2	Ast_3/3_down
GO:BP	biological adhesion	GO:0022610	2.2106e-07	6.65549	1482	169	40	18017	SPP1,APBB1IP,RELN,DOCK8,DOCK5,CDH20,PCDH15,CLDN11,ALCAM,ADGRV1,DLC1,EDIL3,MBP,LAMA2,NCAM2,TMEFF2,CTNNA3,ASTN2,ROBO1,CNTN5,PRNP,ROBO2,MAP4K4,CADM1,PTPRK,CDH12,TNR,GRID2,NEGR1,ADGRL3,TJP1,SPOCK1,DMD,CADM2,PTPRD,DLG2,APLP1,DST,LSAMP,KIRREL3	Ex_3/3_up		GO:MF	gated channel activity	GO:0022836	0.00682608	2.16583	341	23	4	18602	ITPR2,KCNIP4,GRIA2,FAM155A	Ast_3/3_down
GO:BP	trans-synaptic signaling	GO:0099537	5.82682e-07	6.23457	702	169	26	18017	PLP1,GRIN1,SLC1A3,APOE,RELN,CNP,GRIK1,SLC1A2,FCHSD2,MBP,CAMK2B,LAMA2,CBLN2,GRM3,PRNP,TNR,GRID2,PLCL1,KCND2,DTNA,PTPRD,DLG2,NRG3,SLC24A2,GRM5,DCC	Ex_3/3_up		GO:MF	channel regulator activity	GO:0016247	0.00682608	2.16583	147	23	3	18602	NRXN1,GRM3,KCNIP4	Ast_3/3_down
GO:BP	synapse organization	GO:0050808	6.31817e-07	6.19941	417	169	20	18017	GRIN1,APOE,RELN,DOCK10,NFIA,ERBB4,CAMK2B,CBLN2,NRG1,CNTN5,PRNP,ROBO2,TNR,GRID2,ADGRL3,LRRTM4,PTPRD,DLG2,GRM5,KIRREL3	Ex_3/3_up		GO:MF	cation channel activity	GO:0005261	0.00682608	2.16583	341	23	4	18602	ITPR2,KCNIP4,GRIA2,FAM155A	Ast_3/3_down
GO:BP	plasma membrane bounded cell projection organization	GO:0120036	8.74652e-07	6.05816	1567	169	40	18017	DHFR,LINGO1,PLP1,SPP1,GRIN1,APOE,RELN,ARHGAP24,CNP,DOCK10,B2M,CLMN,PCDH15,ALCAM,ADGRV1,SGK1,SHTN1,CAMK2B,LAMA2,ZEB2,FRYL,NCAM2,UNC5C,ROBO1,GAB1,MEF2A,ZSWIM6,PRNP,ROBO2,MAP4K4,PTPRK,TNR,GRID2,NEGR1,SPOCK1,NDRG4,DMD,PTPRD,DCC,KIRREL3	Ex_3/3_up		GO:MF	dicarboxylic acid transmembrane transporter activity	GO:0005310	0.00900576	2.04548	39	23	2	18602	SLC1A3,SLC1A2	Ast_3/3_down
GO:BP	synaptic signaling	GO:0099536	8.86582e-07	6.05228	724	169	26	18017	PLP1,GRIN1,SLC1A3,APOE,RELN,CNP,GRIK1,SLC1A2,FCHSD2,MBP,CAMK2B,LAMA2,CBLN2,GRM3,PRNP,TNR,GRID2,PLCL1,KCND2,DTNA,PTPRD,DLG2,NRG3,SLC24A2,GRM5,DCC	Ex_3/3_up		GO:BP	ion transport	GO:0006811	0.00363927	2.43899	1730	24	11	18017	FTH1,NRXN1,APOE,SLC1A3,SLC1A2,ITPR2,FTL,KCNIP4,GRIA2,FAM155A,PITPNC1	Ast_3/3_down
GO:BP	neuron projection morphogenesis	GO:0048812	1.01122e-06	5.99515	678	169	25	18017	LINGO1,SPP1,GRIN1,APOE,RELN,CNP,DOCK10,ALCAM,SGK1,SHTN1,CAMK2B,LAMA2,ZEB2,UNC5C,ROBO1,GAB1,MEF2A,ZSWIM6,ROBO2,MAP4K4,TNR,DMD,PTPRD,DCC,KIRREL3	Ex_3/3_up		GO:BP	D-aspartate transport	GO:0070777	0.00363927	2.43899	4	24	2	18017	SLC1A3,SLC1A2	Ast_3/3_down
GO:BP	anterograde trans-synaptic signaling	GO:0098916	1.29007e-06	5.88939	694	169	25	18017	PLP1,GRIN1,SLC1A3,APOE,RELN,CNP,GRIK1,SLC1A2,FCHSD2,MBP,CAMK2B,LAMA2,CBLN2,GRM3,PRNP,TNR,GRID2,PLCL1,KCND2,DTNA,DLG2,NRG3,SLC24A2,GRM5,DCC	Ex_3/3_up		GO:BP	D-aspartate import across plasma membrane	GO:0070779	0.00363927	2.43899	4	24	2	18017	SLC1A3,SLC1A2	Ast_3/3_down
GO:BP	chemical synaptic transmission	GO:0007268	1.29007e-06	5.88939	694	169	25	18017	PLP1,GRIN1,SLC1A3,APOE,RELN,CNP,GRIK1,SLC1A2,FCHSD2,MBP,CAMK2B,LAMA2,CBLN2,GRM3,PRNP,TNR,GRID2,PLCL1,KCND2,DTNA,DLG2,NRG3,SLC24A2,GRM5,DCC	Ex_3/3_up		GO:BP	glutamate receptor signaling pathway	GO:0007215	0.00363927	2.43899	103	24	4	18017	NRXN1,GRM3,GRIA2,PLCB1	Ast_3/3_down
GO:BP	cell projection organization	GO:0030030	1.29007e-06	5.88939	1608	169	40	18017	DHFR,LINGO1,PLP1,SPP1,GRIN1,APOE,RELN,ARHGAP24,CNP,DOCK10,B2M,CLMN,PCDH15,ALCAM,ADGRV1,SGK1,SHTN1,CAMK2B,LAMA2,ZEB2,FRYL,NCAM2,UNC5C,ROBO1,GAB1,MEF2A,ZSWIM6,PRNP,ROBO2,MAP4K4,PTPRK,TNR,GRID2,NEGR1,SPOCK1,NDRG4,DMD,PTPRD,DCC,KIRREL3	Ex_3/3_up		GO:BP	intracellular sequestering of iron ion	GO:0006880	0.00404034	2.39358	5	24	2	18017	FTH1,FTL	Ast_3/3_down
GO:BP	plasma membrane bounded cell projection morphogenesis	GO:0120039	1.29007e-06	5.88939	692	169	25	18017	LINGO1,SPP1,GRIN1,APOE,RELN,CNP,DOCK10,ALCAM,SGK1,SHTN1,CAMK2B,LAMA2,ZEB2,UNC5C,ROBO1,GAB1,MEF2A,ZSWIM6,ROBO2,MAP4K4,TNR,DMD,PTPRD,DCC,KIRREL3	Ex_3/3_up		GO:BP	NMDA glutamate receptor clustering	GO:0097114	0.00404034	2.39358	5	24	2	18017	NRXN1,APOE	Ast_3/3_down
GO:BP	cell projection morphogenesis	GO:0048858	1.29176e-06	5.88882	696	169	25	18017	LINGO1,SPP1,GRIN1,APOE,RELN,CNP,DOCK10,ALCAM,SGK1,SHTN1,CAMK2B,LAMA2,ZEB2,UNC5C,ROBO1,GAB1,MEF2A,ZSWIM6,ROBO2,MAP4K4,TNR,DMD,PTPRD,DCC,KIRREL3	Ex_3/3_up		GO:BP	sequestering of iron ion	GO:0097577	0.0051905	2.28479	6	24	2	18017	FTH1,FTL	Ast_3/3_down
GO:BP	regulation of nervous system development	GO:0051960	1.29176e-06	5.88882	978	169	30	18017	LINGO1,SPP1,GRIN1,APOE,RELN,ZNF536,B2M,ERBB4,SHTN1,CAMK2B,MAN2A1,ZEB2,CBLN2,TCF12,ROBO1,NRG1,ZSWIM6,ROBO2,MAP4K4,TNR,GRID2,NEGR1,ADGRL3,SPOCK1,NDRG4,DMD,TCF4,PTPRD,NRG3,DCC	Ex_3/3_up		GO:BP	synaptic signaling	GO:0099536	0.0055821	2.2532	724	24	7	18017	NRXN1,APOE,GRM3,SLC1A3,SLC1A2,GRIA2,PLCB1	Ast_3/3_down
GO:BP	regulation of neurogenesis	GO:0050767	1.38862e-06	5.85742	867	169	28	18017	LINGO1,SPP1,GRIN1,APOE,RELN,ZNF536,B2M,ERBB4,SHTN1,CAMK2B,MAN2A1,ZEB2,TCF12,ROBO1,NRG1,ZSWIM6,ROBO2,MAP4K4,TNR,GRID2,NEGR1,SPOCK1,NDRG4,DMD,TCF4,PTPRD,NRG3,DCC	Ex_3/3_up		GO:BP	D-amino acid transport	GO:0042940	0.00564727	2.24816	7	24	2	18017	SLC1A3,SLC1A2	Ast_3/3_down
GO:BP	cell part morphogenesis	GO:0032990	1.9969e-06	5.69964	716	169	25	18017	LINGO1,SPP1,GRIN1,APOE,RELN,CNP,DOCK10,ALCAM,SGK1,SHTN1,CAMK2B,LAMA2,ZEB2,UNC5C,ROBO1,GAB1,MEF2A,ZSWIM6,ROBO2,MAP4K4,TNR,DMD,PTPRD,DCC,KIRREL3	Ex_3/3_up		GO:BP	cell-cell signaling	GO:0007267	0.00747341	2.12648	1806	24	10	18017	NRXN1,APOE,GRM3,SLC1A3,SLC1A2,ITPR2,GPC5,GRIA2,WWOX,PLCB1	Ast_3/3_down
GO:BP	cell morphogenesis involved in neuron differentiation	GO:0048667	2.19404e-06	5.65876	615	169	23	18017	LINGO1,SPP1,GRIN1,SLC1A3,APOE,RELN,CNP,DOCK10,PCDH15,ALCAM,SHTN1,CAMK2B,LAMA2,ZEB2,UNC5C,ROBO1,GAB1,MEF2A,ZSWIM6,ROBO2,TNR,PTPRD,DCC	Ex_3/3_up		GO:CC	ferritin complex	GO:0070288	0.0001567	3.80493	2	24	2	18956	FTH1,FTL	Ast_3/3_down
GO:BP	regulation of neuron projection development	GO:0010975	3.28963e-06	5.48285	528	169	21	18017	LINGO1,SPP1,GRIN1,APOE,RELN,B2M,SHTN1,CAMK2B,ZEB2,ROBO1,ZSWIM6,ROBO2,MAP4K4,TNR,GRID2,NEGR1,SPOCK1,NDRG4,DMD,PTPRD,DCC	Ex_3/3_up		GO:CC	intracellular ferritin complex	GO:0008043	0.0001567	3.80493	2	24	2	18956	FTH1,FTL	Ast_3/3_down
GO:BP	regulation of neuron differentiation	GO:0045664	4.16485e-06	5.3804	693	169	24	18017	LINGO1,SPP1,GRIN1,APOE,RELN,ZNF536,B2M,SHTN1,CAMK2B,ZEB2,TCF12,ROBO1,ZSWIM6,ROBO2,MAP4K4,TNR,GRID2,NEGR1,SPOCK1,NDRG4,DMD,TCF4,PTPRD,DCC	Ex_3/3_up		GO:CC	synapse	GO:0045202	0.00108207	2.96574	1293	24	9	18956	TENM2,NRXN1,APOE,GRM3,SLC1A3,SLC1A2,GRIA2,PLCB1,ADGRB3	Ast_3/3_down
GO:BP	cellular component morphogenesis	GO:0032989	4.90792e-06	5.3091	812	169	26	18017	LINGO1,SPP1,GRIN1,APOE,RELN,CNP,DOCK10,ALCAM,ABCA2,SGK1,SHTN1,CAMK2B,LAMA2,ZEB2,UNC5C,ROBO1,GAB1,MEF2A,ZSWIM6,ROBO2,MAP4K4,TNR,DMD,PTPRD,DCC,KIRREL3	Ex_3/3_up		GO:CC	autolysosome	GO:0044754	0.00350399	2.45544	10	24	2	18956	FTH1,FTL	Ast_3/3_down
GO:BP	anatomical structure morphogenesis	GO:0009653	5.59006e-06	5.25258	2849	169	55	18017	LINGO1,SPP1,GRIN1,SLC1A3,APOE,RELN,ARHGAP24,DOCK5,CNP,DOCK10,QKI,CDH20,CHST11,PCDH15,ALCAM,ABCA2,ERBB4,DLC1,CRYAB,SGK1,SHTN1,MBP,CAMK2B,LAMA2,MAN2A1,ZEB2,FOXN3,FRYL,TMEFF2,ASTN2,UNC5C,ROBO1,SAT1,NRG1,CLU,GAB1,MEF2A,ZSWIM6,MBNL1,ROBO2,MAP4K4,CDH12,FAIM2,TNR,GRID2,WWOX,TJP1,NDRG4,DMD,TCF4,PTPRD,NRG3,APLP1,DCC,KIRREL3	Ex_3/3_up		GO:CC	cell junction	GO:0030054	0.00423377	2.37327	2058	24	10	18956	TENM2,NRXN1,APOE,GRM3,SLC1A3,ARHGAP24,SLC1A2,GRIA2,PLCB1,ADGRB3	Ast_3/3_down
GO:BP	cell morphogenesis involved in differentiation	GO:0000904	5.67561e-06	5.24599	764	169	25	18017	LINGO1,SPP1,GRIN1,SLC1A3,APOE,RELN,DOCK5,CNP,DOCK10,PCDH15,ALCAM,SHTN1,CAMK2B,LAMA2,ZEB2,TMEFF2,UNC5C,ROBO1,GAB1,MEF2A,ZSWIM6,ROBO2,TNR,PTPRD,DCC	Ex_3/3_up		GO:CC	intrinsic component of plasma membrane	GO:0031226	0.00452981	2.34392	1692	24	9	18956	TENM2,NRXN1,GRM3,SLC1A3,SLC1A2,GPC5,KCNIP4,GRIA2,ADGRB3	Ast_3/3_down
GO:BP	regulation of cell development	GO:0060284	6.52616e-06	5.18534	1006	169	29	18017	LINGO1,SPP1,GRIN1,APOE,RELN,ZNF536,DOCK5,B2M,ERBB4,SHTN1,CAMK2B,MAN2A1,ZEB2,TCF12,ROBO1,NRG1,ZSWIM6,ROBO2,MAP4K4,TNR,GRID2,NEGR1,SPOCK1,NDRG4,DMD,TCF4,PTPRD,NRG3,DCC	Ex_3/3_up		GO:CC	secondary lysosome	GO:0005767	0.00465034	2.33251	16	24	2	18956	FTH1,FTL	Ast_3/3_down
GO:BP	neuron migration	GO:0001764	7.1014e-06	5.14866	169	169	12	18017	RELN,ERBB4,SHTN1,CAMK2B,ASTN2,NRG1,ZSWIM6,ADGRL3,SPOCK1,NRG3,DCC,KIRREL3	Ex_3/3_up		GO:CC	synaptic cleft	GO:0043083	0.00465034	2.33251	16	24	2	18956	APOE,ADGRB3	Ast_3/3_down
GO:BP	behavior	GO:0007610	7.66973e-06	5.11522	615	169	22	18017	GRIN1,SLC1A3,APOE,RELN,PTGDS,CNP,B2M,PCDH15,ABCA2,SLC1A2,SGK1,NRG1,PRNP,CSMD1,TNR,NEGR1,ADGRL3,NDRG4,KCND2,SLC24A2,GRM5,KIRREL3	Ex_3/3_up		GO:CC	astrocyte projection	GO:0097449	0.00720595	2.14231	21	24	2	18956	GRM3,SLC1A2	Ast_3/3_down
GO:BP	system development	GO:0048731	1.02603e-05	4.98884	5096	169	80	18017	DHFR,LINGO1,PLP1,SPP1,GRIN1,SLC1A3,APOE,RELN,ARHGAP24,ZNF536,MOBP,CNP,DOCK10,B2M,CLMN,TF,QKI,NFIA,CHST11,PCDH15,CLDN11,ALCAM,ABCA2,ERBB4,ADGRV1,GRIK1,SLC1A2,DLC1,CRYAB,PIP4K2A,SGK1,SGCZ,SHTN1,PHLPP1,MBP,CAMK2B,LAMA2,MAN2A1,ZEB2,QDPR,FOXN3,FRYL,CBLN2,NCAM2,KIAA1217,TMEFF2,TCF12,ASTN2,UNC5C,ROBO1,SAT1,NRG1,CLU,GAB1,MEF2A,CNTN5,ZSWIM6,MBNL1,ROBO2,MAP4K4,PTPRK,FAIM2,TNR,GRID2,NEGR1,ADGRL3,WWOX,TJP1,S…	Ex_3/3_up		KEGG	Glutamatergic synapse	KEGG:04724	1.1946e-07	6.92278	114	10	6	7963	GRM3,SLC1A3,SLC1A2,ITPR2,GRIA2,PLCB1	Ast_3/3_down
GO:BP	axon development	GO:0061564	1.38692e-05	4.85795	533	169	20	18017	DHFR,LINGO1,PLP1,SPP1,GRIN1,APOE,RELN,CNP,ALCAM,SHTN1,LAMA2,ZEB2,NCAM2,UNC5C,ROBO1,GAB1,ZSWIM6,ROBO2,TNR,DCC	Ex_3/3_up		KEGG	Long-term depression	KEGG:04730	0.00172497	2.76322	59	10	3	7963	ITPR2,GRIA2,PLCB1	Ast_3/3_down
GO:BP	cell junction assembly	GO:0034329	1.41284e-05	4.84991	435	169	18	18017	GRIN1,CDH20,CLDN11,ERBB4,DLC1,CBLN2,NRG1,CNTN5,ROBO2,MAP4K4,PTPRK,CDH12,GRID2,ADGRL3,TJP1,PTPRD,DST,KIRREL3	Ex_3/3_up		KEGG	Long-term potentiation	KEGG:04720	0.00172497	2.76322	67	10	3	7963	ITPR2,GRIA2,PLCB1	Ast_3/3_down
GO:BP	regulation of plasma membrane bounded cell projection organization	GO:0120035	1.85382e-05	4.73193	707	169	23	18017	LINGO1,SPP1,GRIN1,APOE,RELN,ARHGAP24,B2M,SHTN1,CAMK2B,ZEB2,ROBO1,ZSWIM6,PRNP,ROBO2,MAP4K4,TNR,GRID2,NEGR1,SPOCK1,NDRG4,DMD,PTPRD,DCC	Ex_3/3_up		KEGG	Huntington disease	KEGG:05016	0.00738018	2.13193	306	10	4	7963	SLC1A3,SLC1A2,GRIA2,PLCB1	Ast_3/3_down
GO:BP	regulation of neuron migration	GO:2001222	2.26001e-05	4.64589	47	169	7	18017	RELN,ERBB4,SHTN1,CAMK2B,NRG1,ZSWIM6,NRG3	Ex_3/3_up		KEGG	Dopaminergic synapse	KEGG:04728	0.00758175	2.12023	131	10	3	7963	ITPR2,GRIA2,PLCB1	Ast_3/3_down
GO:BP	regulation of cell projection organization	GO:0031344	2.26001e-05	4.64589	717	169	23	18017	LINGO1,SPP1,GRIN1,APOE,RELN,ARHGAP24,B2M,SHTN1,CAMK2B,ZEB2,ROBO1,ZSWIM6,PRNP,ROBO2,MAP4K4,TNR,GRID2,NEGR1,SPOCK1,NDRG4,DMD,PTPRD,DCC	Ex_3/3_up		KEGG	Spinocerebellar ataxia	KEGG:05017	0.00774213	2.11114	142	10	3	7963	ITPR2,GRIA2,PLCB1	Ast_3/3_down
GO:BP	regulation of cell morphogenesis involved in differentiation	GO:0010769	2.30088e-05	4.63811	313	169	15	18017	LINGO1,SPP1,GRIN1,APOE,RELN,DOCK5,SHTN1,CAMK2B,ZEB2,ROBO1,ZSWIM6,ROBO2,TNR,PTPRD,DCC	Ex_3/3_up		KEGG	Retrograde endocannabinoid signaling	KEGG:04723	0.00774213	2.11114	148	10	3	7963	ITPR2,GRIA2,PLCB1	Ast_3/3_down
GO:BP	multicellular organism development	GO:0007275	3.50504e-05	4.45531	5638	169	84	18017	DHFR,LINGO1,PLP1,SPP1,GRIN1,SLC1A3,APOE,RELN,ARHGAP24,ZNF536,MOBP,CNP,DOCK10,B2M,CLMN,TF,QKI,NFIA,CHST11,PCDH15,TSHZ2,CLDN11,ALCAM,ABCA2,ERBB4,ADGRV1,GRIK1,SLC1A2,DLC1,CRYAB,PIP4K2A,SGK1,SGCZ,SHTN1,PHLPP1,EDIL3,MBP,CAMK2B,LAMA2,MAN2A1,ZEB2,QDPR,FOXN3,FRYL,FUT8,CBLN2,NCAM2,KIAA1217,TMEFF2,TCF12,ASTN2,UNC5C,ROBO1,SAT1,NRG1,CLU,GAB1,MEF2A,CNTN5,ZSWIM6,MBNL1,ROBO2,MAP4K4,CADM1,PTPRK,FAIM2,TNR,GRID2,N…	Ex_3/3_up		REAC	Scavenging by Class A Receptors	REAC:R-HSA-3000480	0.000598707	3.22279	19	18	3	10627	FTH1,APOE,FTL	Ast_3/3_down
GO:BP	glutamate receptor signaling pathway	GO:0007215	4.34633e-05	4.36188	103	169	9	18017	GRIN1,RELN,GRIK1,GRM3,PRNP,GRID2,GRIA4,DLG2,GRM5	Ex_3/3_up		REAC	Neurotransmitter uptake and metabolism In glial cells	REAC:R-HSA-112313	0.000832951	3.07938	4	18	2	10627	SLC1A3,SLC1A2	Ast_3/3_down
GO:BP	central nervous system development	GO:0007417	5.00134e-05	4.30091	1065	169	28	18017	PLP1,GRIN1,RELN,CNP,B2M,ABCA2,ERBB4,GRIK1,SLC1A2,DLC1,MBP,ZEB2,UNC5C,ROBO1,NRG1,CLU,ZSWIM6,ROBO2,FAIM2,TNR,GRID2,ADGRL3,SPOCK1,NDRG4,DMD,NRG3,DCC,KIRREL3	Ex_3/3_up		REAC	Astrocytic Glutamate-Glutamine Uptake And Metabolism	REAC:R-HSA-210455	0.000832951	3.07938	4	18	2	10627	SLC1A3,SLC1A2	Ast_3/3_down
GO:BP	locomotory behavior	GO:0007626	5.00134e-05	4.30091	209	169	12	18017	GRIN1,APOE,RELN,CNP,PCDH15,ABCA2,NRG1,TNR,NEGR1,ADGRL3,KCND2,GRM5	Ex_3/3_up		GO:MF	enzyme binding	GO:0019899	0.00769622	2.11372	2282	33	13	18602	CALM1,RTN4,HSP90AA1,PEBP1,TUBA1B,TMSB4X,ATP1B1,KALRN,APP,CKB,PLCB1,UCHL1,YWHAH	Ex_3/3_down
GO:BP	localization of cell	GO:0051674	5.00134e-05	4.30091	1823	169	39	18017	APOE,RELN,DOCK8,ARHGAP24,DOCK5,DOCK10,TF,ERBB4,DLC1,GPC5,SPOCK3,SGK1,SHTN1,CAMK2B,LAMA2,ZEB2,FUT8,TMEFF2,ASTN2,UNC5C,ROBO1,NRG1,GAB1,ZSWIM6,MAP4K4,PTPRK,PDE4B,TNR,ADGRL3,SSH2,TJP1,SPOCK1,NDRG4,ELMO1,NRG3,LDLRAD4,DST,DCC,KIRREL3	Ex_3/3_up		GO:MF	cytoskeletal protein binding	GO:0008092	0.00769622	2.11372	983	33	9	18602	CALM1,HSP90AA1,STMN1,MAP1B,TMSB4X,CLASP2,STMN2,NRCAM,YWHAH	Ex_3/3_down
GO:BP	cell motility	GO:0048870	5.00134e-05	4.30091	1823	169	39	18017	APOE,RELN,DOCK8,ARHGAP24,DOCK5,DOCK10,TF,ERBB4,DLC1,GPC5,SPOCK3,SGK1,SHTN1,CAMK2B,LAMA2,ZEB2,FUT8,TMEFF2,ASTN2,UNC5C,ROBO1,NRG1,GAB1,ZSWIM6,MAP4K4,PTPRK,PDE4B,TNR,ADGRL3,SSH2,TJP1,SPOCK1,NDRG4,ELMO1,NRG3,LDLRAD4,DST,DCC,KIRREL3	Ex_3/3_up		GO:MF	nitric-oxide synthase regulator activity	GO:0030235	0.00769622	2.11372	8	33	2	18602	CALM1,HSP90AA1	Ex_3/3_down
GO:BP	movement of cell or subcellular component	GO:0006928	6.47123e-05	4.18901	2301	169	45	18017	APOE,RELN,DOCK8,ARHGAP24,DOCK5,DOCK10,TF,ALCAM,ERBB4,DLC1,GPC5,SPOCK3,SGK1,SHTN1,CAMK2B,LAMA2,ZEB2,FUT8,TMEFF2,CTNNA3,ASTN2,UNC5C,ROBO1,NRG1,GAB1,ZSWIM6,ROBO2,MAP4K4,PTPRK,PDE4B,TNR,ADGRL3,SSH2,ARHGAP21,TJP1,SPOCK1,NDRG4,DMD,ELMO1,DLG2,NRG3,LDLRAD4,DST,DCC,KIRREL3	Ex_3/3_up		GO:MF	ubiquitin protein ligase binding	GO:0031625	0.00934462	2.02944	292	33	5	18602	RTN4,HSP90AA1,TUBA1B,CKB,UCHL1	Ex_3/3_down
GO:BP	multicellular organismal process	GO:0032501	7.50036e-05	4.12492	7992	169	106	18017	DHFR,SLC26A3,LINGO1,PLP1,SPP1,GRIN1,SLC1A3,APOE,RELN,DOCK8,ARHGAP24,PTGDS,ZNF536,DOCK5,MOBP,CNP,DOCK10,B2M,LHFPL3,CLMN,TF,QKI,NFIA,CHST11,PCDH15,TSHZ2,CLDN11,ALCAM,ABCA2,ERBB4,ADGRV1,GRIK1,SLC1A2,DLC1,CRYAB,ZBTB20,PIP4K2A,POLR2F,SGK1,SGCZ,SHTN1,PHLPP1,EDIL3,MBP,PDE1C,SLCO3A1,CAMK2B,LAMA2,MAN2A1,ITPR2,ZEB2,QDPR,FOXN3,FRYL,FUT8,CBLN2,NCAM2,KIAA1217,TMEFF2,TCF12,CTNNA3,ASTN2,UNC5C,ROBO1,SAT1,NRG1,CL…	Ex_3/3_up		GO:MF	calcium-dependent protein binding	GO:0048306	0.00934462	2.02944	65	33	3	18602	CALM1,SNAP25,STMN2	Ex_3/3_down
GO:BP	anatomical structure development	GO:0048856	7.50036e-05	4.12492	6143	169	88	18017	DHFR,SLC26A3,LINGO1,PLP1,SPP1,GRIN1,SLC1A3,APOE,RELN,ARHGAP24,ZNF536,DOCK5,MOBP,CNP,DOCK10,B2M,CLMN,TF,QKI,NFIA,CDH20,CHST11,PCDH15,TSHZ2,CLDN11,ALCAM,ABCA2,ERBB4,ADGRV1,GRIK1,SLC1A2,DLC1,CRYAB,PIP4K2A,SGK1,SGCZ,SHTN1,PHLPP1,EDIL3,MBP,CAMK2B,LAMA2,MAN2A1,ZEB2,QDPR,FOXN3,FRYL,FUT8,CBLN2,NCAM2,KIAA1217,TMEFF2,TCF12,ASTN2,UNC5C,ROBO1,SAT1,NRG1,CLU,GAB1,MEF2A,CNTN5,ZSWIM6,MBNL1,ROBO2,MAP4K4,CADM1,PTP…	Ex_3/3_up		GO:MF	ubiquitin-like protein ligase binding	GO:0044389	0.00934462	2.02944	310	33	5	18602	RTN4,HSP90AA1,TUBA1B,CKB,UCHL1	Ex_3/3_down
GO:BP	brain development	GO:0007420	8.2682e-05	4.08259	784	169	23	18017	PLP1,GRIN1,RELN,CNP,B2M,ERBB4,SLC1A2,DLC1,MBP,ZEB2,UNC5C,ROBO1,NRG1,ZSWIM6,ROBO2,FAIM2,TNR,GRID2,ADGRL3,NDRG4,DMD,NRG3,KIRREL3	Ex_3/3_up		GO:BP	neuron projection morphogenesis	GO:0048812	1.38253e-08	7.85933	678	31	13	18017	RTN4,HSP90AA1,STMN1,MAP1B,CHN1,CCK,KALRN,APP,NRXN3,NRCAM,UCHL1,YWHAH,GPM6A	Ex_3/3_down
GO:BP	locomotion	GO:0040011	8.2682e-05	4.08259	2020	169	41	18017	APOE,RELN,DOCK8,ARHGAP24,DOCK5,DOCK10,TF,ALCAM,ERBB4,DLC1,GPC5,SPOCK3,SGK1,SHTN1,CAMK2B,LAMA2,ZEB2,FUT8,TMEFF2,ASTN2,UNC5C,ROBO1,NRG1,GAB1,ZSWIM6,ROBO2,MAP4K4,PTPRK,PDE4B,TNR,ADGRL3,SSH2,TJP1,SPOCK1,NDRG4,ELMO1,NRG3,LDLRAD4,DST,DCC,KIRREL3	Ex_3/3_up		GO:BP	cellular component morphogenesis	GO:0032989	1.38253e-08	7.85933	812	31	14	18017	RTN4,HSP90AA1,STMN1,MAP1B,CHN1,CCK,KALRN,CLASP2,APP,NRXN3,NRCAM,UCHL1,YWHAH,GPM6A	Ex_3/3_down
GO:BP	cell migration	GO:0016477	8.2682e-05	4.08259	1651	169	36	18017	APOE,RELN,DOCK8,ARHGAP24,DOCK5,DOCK10,ERBB4,DLC1,GPC5,SGK1,SHTN1,CAMK2B,LAMA2,ZEB2,FUT8,TMEFF2,ASTN2,UNC5C,ROBO1,NRG1,GAB1,ZSWIM6,MAP4K4,PTPRK,PDE4B,TNR,ADGRL3,SSH2,TJP1,SPOCK1,NDRG4,ELMO1,NRG3,LDLRAD4,DCC,KIRREL3	Ex_3/3_up		GO:BP	neuron development	GO:0048666	1.38253e-08	7.85933	1167	31	16	18017	RTN4,HSP90AA1,STMN1,SNAP25,AHI1,MAP1B,CHN1,CCK,KALRN,APP,NRXN3,STMN2,NRCAM,UCHL1,YWHAH,GPM6A	Ex_3/3_down
GO:BP	telencephalon development	GO:0021537	9.83355e-05	4.00729	269	169	13	18017	GRIN1,RELN,ERBB4,SLC1A2,ZEB2,ROBO1,NRG1,ZSWIM6,ROBO2,TNR,DMD,NRG3,KIRREL3	Ex_3/3_up		GO:BP	plasma membrane bounded cell projection morphogenesis	GO:0120039	1.38253e-08	7.85933	692	31	13	18017	RTN4,HSP90AA1,STMN1,MAP1B,CHN1,CCK,KALRN,APP,NRXN3,NRCAM,UCHL1,YWHAH,GPM6A	Ex_3/3_down
GO:BP	forebrain development	GO:0030900	9.83355e-05	4.00729	408	169	16	18017	GRIN1,RELN,CNP,B2M,ERBB4,SLC1A2,DLC1,ZEB2,ROBO1,NRG1,ZSWIM6,ROBO2,TNR,DMD,NRG3,KIRREL3	Ex_3/3_up		GO:BP	neuron projection development	GO:0031175	1.38253e-08	7.85933	1030	31	15	18017	RTN4,HSP90AA1,STMN1,SNAP25,MAP1B,CHN1,CCK,KALRN,APP,NRXN3,STMN2,NRCAM,UCHL1,YWHAH,GPM6A	Ex_3/3_down
GO:BP	regulation of localization	GO:0032879	9.83355e-05	4.00729	2913	169	52	18017	SPP1,GRIN1,APOE,KCNH8,RELN,DOCK8,DOCK5,DOCK10,HIP1,B2M,TF,ABCA2,ERBB4,SLC1A2,DLC1,CRYAB,GPC5,SPOCK3,SGK1,SHTN1,CAMK2B,LAMA2,ITPR2,TMEFF2,CTNNA3,ASTN2,UNC5C,ROBO1,NRG1,CLU,GAB1,MEF2A,ZSWIM6,PRNP,KCNIP4,DNAJC6,MAP4K4,CADM1,PTPRK,PDE4B,GRIA4,SSH2,TJP1,NDRG4,KCND2,DMD,DLG2,NRG3,LDLRAD4,GRM5,KCNQ5,DPP10	Ex_3/3_up		GO:BP	cell projection morphogenesis	GO:0048858	1.38253e-08	7.85933	696	31	13	18017	RTN4,HSP90AA1,STMN1,MAP1B,CHN1,CCK,KALRN,APP,NRXN3,NRCAM,UCHL1,YWHAH,GPM6A	Ex_3/3_down
GO:BP	regulation of axonogenesis	GO:0050770	0.000105381	3.97724	189	169	11	18017	LINGO1,SPP1,GRIN1,APOE,SHTN1,ZEB2,ROBO1,ZSWIM6,ROBO2,TNR,DCC	Ex_3/3_up		GO:BP	cell part morphogenesis	GO:0032990	1.68545e-08	7.77328	716	31	13	18017	RTN4,HSP90AA1,STMN1,MAP1B,CHN1,CCK,KALRN,APP,NRXN3,NRCAM,UCHL1,YWHAH,GPM6A	Ex_3/3_down
GO:BP	cell-cell adhesion via plasma-membrane adhesion molecules	GO:0098742	0.000121202	3.91649	275	169	13	18017	CDH20,PCDH15,CLDN11,ALCAM,MBP,ROBO1,ROBO2,CADM1,CDH12,GRID2,ADGRL3,PTPRD,KIRREL3	Ex_3/3_up		GO:BP	plasma membrane bounded cell projection organization	GO:0120036	1.74584e-08	7.75799	1567	31	17	18017	RTN4,HSP90AA1,STMN1,SNAP25,DYNLL1,AHI1,MAP1B,CHN1,CCK,KALRN,APP,NRXN3,STMN2,NRCAM,UCHL1,YWHAH,GPM6A	Ex_3/3_down
GO:BP	modulation of chemical synaptic transmission	GO:0050804	0.000131681	3.88048	420	169	16	18017	GRIN1,SLC1A3,APOE,RELN,GRIK1,CAMK2B,LAMA2,GRM3,PRNP,TNR,GRID2,PLCL1,NRG3,SLC24A2,GRM5,DCC	Ex_3/3_up		GO:BP	cell projection organization	GO:0030030	2.10161e-08	7.67745	1608	31	17	18017	RTN4,HSP90AA1,STMN1,SNAP25,DYNLL1,AHI1,MAP1B,CHN1,CCK,KALRN,APP,NRXN3,STMN2,NRCAM,UCHL1,YWHAH,GPM6A	Ex_3/3_down
GO:BP	regulation of trans-synaptic signaling	GO:0099177	0.000133479	3.87459	421	169	16	18017	GRIN1,SLC1A3,APOE,RELN,GRIK1,CAMK2B,LAMA2,GRM3,PRNP,TNR,GRID2,PLCL1,NRG3,SLC24A2,GRM5,DCC	Ex_3/3_up		GO:BP	nervous system development	GO:0007399	2.10161e-08	7.67745	2483	31	20	18017	CALM1,RTN4,HSP90AA1,STMN1,SNAP25,DYNLL1,AHI1,MAP1B,CHN1,CCK,KALRN,APP,CKB,PLCB1,NRXN3,STMN2,NRCAM,UCHL1,YWHAH,GPM6A	Ex_3/3_down
GO:BP	negative regulation of nervous system development	GO:0051961	0.000150374	3.82283	328	169	14	18017	LINGO1,SPP1,APOE,ZNF536,B2M,ERBB4,NRG1,ROBO2,MAP4K4,TNR,SPOCK1,DMD,NRG3,DCC	Ex_3/3_up		GO:BP	cell morphogenesis involved in neuron differentiation	GO:0048667	3.19068e-08	7.49612	615	31	12	18017	RTN4,HSP90AA1,STMN1,MAP1B,CHN1,CCK,KALRN,APP,NRXN3,NRCAM,UCHL1,YWHAH	Ex_3/3_down
GO:BP	regulation of cellular component movement	GO:0051270	0.000150374	3.82283	1142	169	28	18017	APOE,RELN,DOCK8,DOCK5,DOCK10,TF,ERBB4,DLC1,SPOCK3,SGK1,SHTN1,CAMK2B,LAMA2,TMEFF2,CTNNA3,UNC5C,ROBO1,NRG1,GAB1,ZSWIM6,MAP4K4,PTPRK,PDE4B,SSH2,TJP1,NDRG4,NRG3,LDLRAD4	Ex_3/3_up		GO:BP	neuron differentiation	GO:0030182	3.91755e-08	7.40699	1437	31	16	18017	RTN4,HSP90AA1,STMN1,SNAP25,AHI1,MAP1B,CHN1,CCK,KALRN,APP,NRXN3,STMN2,NRCAM,UCHL1,YWHAH,GPM6A	Ex_3/3_down
GO:BP	developmental process	GO:0032502	0.00015975	3.79656	6676	169	92	18017	DHFR,SLC26A3,LINGO1,PLP1,SPP1,GRIN1,SLC1A3,APOE,RELN,ARHGAP24,ZNF536,DOCK5,MOBP,CNP,DOCK10,HIP1,B2M,CLMN,TF,QKI,NFIA,CDH20,CHST11,PCDH15,TSHZ2,CLDN11,ALCAM,ABCA2,ERBB4,ADGRV1,GRIK1,SLC1A2,DLC1,CRYAB,PIP4K2A,POLR2F,SGK1,SGCZ,SHTN1,PHLPP1,EDIL3,MBP,CAMK2B,LAMA2,MAN2A1,ZEB2,QDPR,FOXN3,FRYL,FUT8,CBLN2,NCAM2,KIAA1217,TMEFF2,TCF12,ASTN2,UNC5C,ROBO1,SAT1,NRG1,CLU,GAB1,MEF2A,CNTN5,ZSWIM6,PRNP,MBNL1,ROBO2…	Ex_3/3_up		GO:BP	generation of neurons	GO:0048699	1.85579e-07	6.73147	1605	31	16	18017	RTN4,HSP90AA1,STMN1,SNAP25,AHI1,MAP1B,CHN1,CCK,KALRN,APP,NRXN3,STMN2,NRCAM,UCHL1,YWHAH,GPM6A	Ex_3/3_down
GO:BP	head development	GO:0060322	0.000168131	3.77435	829	169	23	18017	PLP1,GRIN1,RELN,CNP,B2M,ERBB4,SLC1A2,DLC1,MBP,ZEB2,UNC5C,ROBO1,NRG1,ZSWIM6,ROBO2,FAIM2,TNR,GRID2,ADGRL3,NDRG4,DMD,NRG3,KIRREL3	Ex_3/3_up		GO:BP	cell morphogenesis involved in differentiation	GO:0000904	2.97782e-07	6.5261	764	31	12	18017	RTN4,HSP90AA1,STMN1,MAP1B,CHN1,CCK,KALRN,APP,NRXN3,NRCAM,UCHL1,YWHAH	Ex_3/3_down
GO:BP	axonogenesis	GO:0007409	0.00018968	3.72198	488	169	17	18017	LINGO1,SPP1,GRIN1,APOE,RELN,CNP,ALCAM,SHTN1,LAMA2,ZEB2,UNC5C,ROBO1,GAB1,ZSWIM6,ROBO2,TNR,DCC	Ex_3/3_up		GO:BP	neurogenesis	GO:0022008	4.07189e-07	6.3902	1710	31	16	18017	RTN4,HSP90AA1,STMN1,SNAP25,AHI1,MAP1B,CHN1,CCK,KALRN,APP,NRXN3,STMN2,NRCAM,UCHL1,YWHAH,GPM6A	Ex_3/3_down
GO:BP	regulation of locomotion	GO:0040012	0.000190325	3.72051	1094	169	27	18017	APOE,RELN,DOCK8,DOCK5,DOCK10,TF,ERBB4,DLC1,SPOCK3,SGK1,SHTN1,CAMK2B,LAMA2,TMEFF2,UNC5C,ROBO1,NRG1,GAB1,ZSWIM6,ROBO2,MAP4K4,PTPRK,SSH2,TJP1,NDRG4,NRG3,LDLRAD4	Ex_3/3_up		GO:BP	axonogenesis	GO:0007409	6.45626e-07	6.19002	488	31	10	18017	RTN4,HSP90AA1,STMN1,MAP1B,CHN1,CCK,APP,NRXN3,NRCAM,UCHL1	Ex_3/3_down
GO:BP	regulation of cell motility	GO:2000145	0.000283594	3.5473	1052	169	26	18017	APOE,RELN,DOCK8,DOCK5,DOCK10,TF,ERBB4,DLC1,SPOCK3,SGK1,SHTN1,CAMK2B,LAMA2,TMEFF2,UNC5C,ROBO1,NRG1,GAB1,ZSWIM6,MAP4K4,PTPRK,SSH2,TJP1,NDRG4,NRG3,LDLRAD4	Ex_3/3_up		GO:BP	cell morphogenesis	GO:0000902	8.26872e-07	6.08256	1058	31	13	18017	RTN4,HSP90AA1,STMN1,MAP1B,CHN1,CCK,KALRN,APP,NRXN3,NRCAM,UCHL1,YWHAH,GPM6A	Ex_3/3_down
GO:BP	negative regulation of neurogenesis	GO:0050768	0.000297952	3.52585	303	169	13	18017	LINGO1,SPP1,APOE,ZNF536,B2M,ERBB4,NRG1,MAP4K4,TNR,SPOCK1,DMD,NRG3,DCC	Ex_3/3_up		GO:BP	regulation of cellular component organization	GO:0051128	9.29693e-07	6.03166	2450	31	18	18017	CALM1,RTN4,HSP90AA1,STMN1,SNAP25,AHI1,MAP1B,CHN1,TMSB4X,CCK,KALRN,CLASP2,APP,PLCB1,STMN2,NRCAM,YWHAH,GPM6A	Ex_3/3_down
GO:BP	cell differentiation	GO:0030154	0.000359857	3.44387	4388	169	67	18017	DHFR,SLC26A3,LINGO1,PLP1,SPP1,GRIN1,SLC1A3,APOE,RELN,ARHGAP24,ZNF536,DOCK5,CNP,DOCK10,HIP1,B2M,CLMN,TF,QKI,CHST11,PCDH15,ALCAM,ABCA2,ERBB4,ADGRV1,PIP4K2A,SGK1,SGCZ,SHTN1,CAMK2B,LAMA2,MAN2A1,ZEB2,FRYL,NCAM2,TMEFF2,TCF12,ASTN2,UNC5C,ROBO1,NRG1,CLU,GAB1,MEF2A,ZSWIM6,MBNL1,ROBO2,MAP4K4,CADM1,PTPRK,FAIM2,TNR,GRID2,NEGR1,ADGRL3,WWOX,TJP1,SPOCK1,NDRG4,DMD,TCF4,PTPRD,NRG3,LDLRAD4,KAZN,DCC,KIRREL3	Ex_3/3_up		GO:BP	axon development	GO:0061564	1.26088e-06	5.89933	533	31	10	18017	RTN4,HSP90AA1,STMN1,MAP1B,CHN1,CCK,APP,NRXN3,NRCAM,UCHL1	Ex_3/3_down
GO:BP	negative regulation of amyloid fibril formation	GO:1905907	0.000394855	3.40356	5	169	3	18017	APOE,CRYAB,CLU	Ex_3/3_up		GO:BP	response to stimulus	GO:0050896	5.50887e-06	5.25894	9430	31	30	18017	CALM1,SPARCL1,RTN4,HSP90AA1,STMN1,PEBP1,SNAP25,FTH1,TUBA1B,DYNLL1,AHI1,MAP1B,CHN1,TMSB4X,CCK,ATP1B1,KALRN,VSNL1,CLASP2,APP,PLCB1,NRXN3,STMN2,NRCAM,UCHL1,GPHN,YWHAH,RGS7,MAPK10,GPM6A	Ex_3/3_down
GO:BP	synapse assembly	GO:0007416	0.00042003	3.37672	182	169	10	18017	GRIN1,ERBB4,CBLN2,NRG1,CNTN5,ROBO2,GRID2,ADGRL3,PTPRD,KIRREL3	Ex_3/3_up		GO:BP	cell development	GO:0048468	1.37682e-05	4.86112	2237	31	16	18017	RTN4,HSP90AA1,STMN1,SNAP25,AHI1,MAP1B,CHN1,CCK,KALRN,APP,NRXN3,STMN2,NRCAM,UCHL1,YWHAH,GPM6A	Ex_3/3_down
GO:BP	cell-cell adhesion	GO:0098609	0.000428357	3.36819	884	169	23	18017	DOCK8,CDH20,PCDH15,CLDN11,ALCAM,ADGRV1,MBP,NCAM2,CTNNA3,ASTN2,ROBO1,PRNP,ROBO2,CADM1,CDH12,TNR,GRID2,NEGR1,ADGRL3,TJP1,PTPRD,DLG2,KIRREL3	Ex_3/3_up		GO:BP	export from cell	GO:0140352	5.22988e-05	4.28151	1537	31	13	18017	CALM1,HSP90AA1,SNAP25,FTH1,DYNLL1,TMSB4X,CCK,ATP1B1,KALRN,VSNL1,CLASP2,APP,NRXN3	Ex_3/3_down
GO:BP	cyclic nucleotide catabolic process	GO:0009214	0.000445161	3.35148	15	169	4	18017	CNP,PDE8A,PDE1A,PDE4B	Ex_3/3_up		GO:BP	negative regulation of microtubule polymerization or depolymerization	GO:0031111	5.46174e-05	4.26267	40	31	4	18017	STMN1,MAP1B,CLASP2,STMN2	Ex_3/3_down
GO:BP	negative regulation of cell projection organization	GO:0031345	0.000587059	3.23132	190	169	10	18017	LINGO1,SPP1,APOE,ARHGAP24,B2M,PRNP,MAP4K4,TNR,SPOCK1,DCC	Ex_3/3_up		GO:BP	regulation of localization	GO:0032879	6.87789e-05	4.16254	2913	31	17	18017	CALM1,RTN4,HSP90AA1,STMN1,SNAP25,AHI1,MAP1B,TMSB4X,CCK,ATP1B1,KALRN,VSNL1,CLASP2,APP,PLCB1,NRXN3,YWHAH	Ex_3/3_down
GO:BP	cellular developmental process	GO:0048869	0.000625909	3.20349	4468	169	67	18017	DHFR,SLC26A3,LINGO1,PLP1,SPP1,GRIN1,SLC1A3,APOE,RELN,ARHGAP24,ZNF536,DOCK5,CNP,DOCK10,HIP1,B2M,CLMN,TF,QKI,CHST11,PCDH15,ALCAM,ABCA2,ERBB4,ADGRV1,PIP4K2A,SGK1,SGCZ,SHTN1,CAMK2B,LAMA2,MAN2A1,ZEB2,FRYL,NCAM2,TMEFF2,TCF12,ASTN2,UNC5C,ROBO1,NRG1,CLU,GAB1,MEF2A,ZSWIM6,MBNL1,ROBO2,MAP4K4,CADM1,PTPRK,FAIM2,TNR,GRID2,NEGR1,ADGRL3,WWOX,TJP1,SPOCK1,NDRG4,DMD,TCF4,PTPRD,NRG3,LDLRAD4,KAZN,DCC,KIRREL3	Ex_3/3_up		GO:BP	central nervous system development	GO:0007417	6.87789e-05	4.16254	1065	31	11	18017	CALM1,RTN4,HSP90AA1,STMN1,DYNLL1,AHI1,APP,CKB,PLCB1,NRCAM,YWHAH	Ex_3/3_down
GO:BP	signaling	GO:0023052	0.000701747	3.15382	6814	169	91	18017	RASGEF1B,MTRNR2L8,MTRNR2L12,PLP1,SPP1,GRIN1,SLC1A3,APOE,APBB1IP,RELN,DOCK8,ST18,ARHGAP24,ZNF536,DOCK5,CNP,DOCK10,HIP1,B2M,TF,MAML2,CHST11,ALCAM,ERBB4,ADGRV1,GRIK1,SLC1A2,RNF220,DLC1,CRYAB,GPC5,PIP4K2A,PITPNC1,POLR2F,SGK1,SHTN1,PDE8A,FCHSD2,PHLPP1,MBP,PDE1C,CAMK2B,LAMA2,ITPR2,ZEB2,FUT8,CBLN2,GRM3,CTNNA3,UNC5C,ROBO1,PDE1A,NRG1,CLU,GAB1,ARAP2,MEF2A,KCTD16,PRNP,KCNIP4,ROBO2,MAP4K4,CADM1,PTPRK,PDE4B,F…	Ex_3/3_up		GO:BP	regulation of signaling	GO:0023051	6.87789e-05	4.16254	3699	31	19	18017	CALM1,RTN4,HSP90AA1,STMN1,PEBP1,SNAP25,MAP1B,CHN1,TMSB4X,ATP1B1,KALRN,VSNL1,APP,PLCB1,NRXN3,UCHL1,YWHAH,RGS7,MAPK10	Ex_3/3_down
GO:BP	cell communication	GO:0007154	0.000760289	3.11902	6828	169	91	18017	RASGEF1B,MTRNR2L8,MTRNR2L12,PLP1,SPP1,GRIN1,SLC1A3,APOE,APBB1IP,RELN,DOCK8,ST18,ARHGAP24,ZNF536,DOCK5,CNP,DOCK10,HIP1,B2M,TF,MAML2,CHST11,ALCAM,ERBB4,ADGRV1,GRIK1,SLC1A2,RNF220,DLC1,CRYAB,GPC5,PIP4K2A,PITPNC1,POLR2F,SGK1,SHTN1,PDE8A,FCHSD2,PHLPP1,MBP,PDE1C,CAMK2B,LAMA2,ITPR2,ZEB2,FUT8,CBLN2,GRM3,CTNNA3,UNC5C,ROBO1,PDE1A,NRG1,CLU,GAB1,ARAP2,MEF2A,KCTD16,PRNP,ROBO2,MAP4K4,CADM1,PTPRK,PDE4B,FAIM2,TN…	Ex_3/3_up		GO:BP	substantia nigra development	GO:0021762	6.87789e-05	4.16254	44	31	4	18017	CALM1,DYNLL1,CKB,YWHAH	Ex_3/3_down
GO:BP	regulation of cell migration	GO:0030334	0.000812338	3.09026	991	169	24	18017	APOE,RELN,DOCK8,DOCK5,DOCK10,ERBB4,DLC1,SGK1,SHTN1,CAMK2B,LAMA2,TMEFF2,UNC5C,ROBO1,NRG1,GAB1,ZSWIM6,MAP4K4,PTPRK,SSH2,TJP1,NDRG4,NRG3,LDLRAD4	Ex_3/3_up		GO:BP	microtubule depolymerization	GO:0007019	8.68289e-05	4.06134	47	31	4	18017	STMN1,MAP1B,CLASP2,STMN2	Ex_3/3_down
GO:BP	long-term memory	GO:0007616	0.000890576	3.05033	36	169	5	18017	GRIN1,APOE,RELN,SGK1,PRNP	Ex_3/3_up		GO:BP	movement of cell or subcellular component	GO:0006928	0.000103754	3.98399	2301	31	15	18017	RTN4,STMN1,DYNLL1,MAP1B,CHN1,TMSB4X,CCK,ATP1B1,CLASP2,APP,PLCB1,NRXN3,NRCAM,UCHL1,GPM6A	Ex_3/3_down
GO:BP	central nervous system neuron differentiation	GO:0021953	0.000922293	3.03513	202	169	10	18017	B2M,ERBB4,ZEB2,ROBO1,ZSWIM6,ROBO2,FAIM2,GRID2,SPOCK1,DCC	Ex_3/3_up		GO:BP	regulation of neuron differentiation	GO:0045664	0.000106432	3.97293	693	31	9	18017	RTN4,SNAP25,MAP1B,CHN1,KALRN,APP,STMN2,NRCAM,YWHAH	Ex_3/3_down
GO:BP	regulation of cell morphogenesis	GO:0022604	0.000985254	3.00645	506	169	16	18017	LINGO1,SPP1,GRIN1,APOE,RELN,DOCK5,DLC1,SHTN1,CAMK2B,ZEB2,ROBO1,ZSWIM6,ROBO2,TNR,PTPRD,DCC	Ex_3/3_up		GO:BP	exocytosis	GO:0006887	0.000106432	3.97293	902	31	10	18017	CALM1,HSP90AA1,SNAP25,FTH1,DYNLL1,TMSB4X,VSNL1,CLASP2,APP,NRXN3	Ex_3/3_down
GO:BP	amyloid fibril formation	GO:1990000	0.00108912	2.96292	19	169	4	18017	APOE,B2M,CRYAB,CLU	Ex_3/3_up		GO:BP	regulation of plasma membrane bounded cell projection organization	GO:0120035	0.00012163	3.91496	707	31	9	18017	RTN4,SNAP25,MAP1B,CHN1,KALRN,STMN2,NRCAM,YWHAH,GPM6A	Ex_3/3_down
GO:BP	positive regulation of nervous system development	GO:0051962	0.00108912	2.96292	569	169	17	18017	APOE,RELN,SHTN1,CAMK2B,MAN2A1,ZEB2,CBLN2,TCF12,ROBO1,ROBO2,GRID2,NEGR1,ADGRL3,NDRG4,DMD,TCF4,PTPRD	Ex_3/3_up		GO:BP	cellular localization	GO:0051641	0.00012843	3.89133	3487	31	18	18017	CALM1,RTN4,HSP90AA1,SNAP25,FTH1,TUBA1B,DYNLL1,AHI1,MAP1B,TMSB4X,ATP1B1,VSNL1,CLASP2,APP,NRXN3,UCHL1,GPHN,YWHAH	Ex_3/3_down
GO:BP	negative regulation of cell development	GO:0010721	0.00113077	2.94662	351	169	13	18017	LINGO1,SPP1,APOE,ZNF536,B2M,ERBB4,NRG1,MAP4K4,TNR,SPOCK1,DMD,NRG3,DCC	Ex_3/3_up		GO:BP	regulation of neuron projection development	GO:0010975	0.00012843	3.89133	528	31	8	18017	RTN4,SNAP25,MAP1B,CHN1,KALRN,STMN2,NRCAM,YWHAH	Ex_3/3_down
GO:BP	positive regulation of multicellular organismal process	GO:0051240	0.00113077	2.94662	1894	169	36	18017	SPP1,GRIN1,APOE,RELN,DOCK5,B2M,TF,ERBB4,ADGRV1,ZBTB20,POLR2F,SHTN1,MBP,CAMK2B,MAN2A1,ZEB2,CBLN2,TCF12,ROBO1,NRG1,CLU,GAB1,MEF2A,ROBO2,MAP4K4,CADM1,PDE4B,TNR,GRID2,NEGR1,ADGRL3,TJP1,NDRG4,DMD,TCF4,PTPRD	Ex_3/3_up		GO:BP	regulation of cell projection organization	GO:0031344	0.00012843	3.89133	717	31	9	18017	RTN4,SNAP25,MAP1B,CHN1,KALRN,STMN2,NRCAM,YWHAH,GPM6A	Ex_3/3_down
GO:BP	regulation of synapse organization	GO:0050807	0.00140448	2.85249	214	169	10	18017	GRIN1,APOE,RELN,CAMK2B,CBLN2,PRNP,ROBO2,GRID2,ADGRL3,PTPRD	Ex_3/3_up		GO:BP	positive regulation of catalytic activity	GO:0043085	0.00015617	3.8064	1475	31	12	18017	CALM1,HSP90AA1,DYNLL1,CHN1,TMSB4X,CCK,ATP1B1,KALRN,APP,PLCB1,RGS7,MAPK10	Ex_3/3_down
GO:BP	synaptic transmission, glutamatergic	GO:0035249	0.0014132	2.8498	97	169	7	18017	GRIN1,RELN,GRIK1,GRM3,TNR,GRID2,GRM5	Ex_3/3_up		GO:BP	secretion by cell	GO:0032940	0.000161973	3.79056	1484	31	12	18017	CALM1,HSP90AA1,SNAP25,FTH1,DYNLL1,TMSB4X,CCK,KALRN,VSNL1,CLASP2,APP,NRXN3	Ex_3/3_down
GO:BP	regulation of amyloid fibril formation	GO:1905906	0.00171764	2.76507	8	169	3	18017	APOE,CRYAB,CLU	Ex_3/3_up		GO:BP	cellular component organization	GO:0016043	0.000164927	3.78271	6499	31	24	18017	CALM1,RTN4,HSP90AA1,STMN1,SNAP25,TUBA1B,DYNLL1,AHI1,MAP1B,CHN1,TMSB4X,CCK,ATP1B1,KALRN,CLASP2,APP,PLCB1,NRXN3,STMN2,NRCAM,UCHL1,GPHN,YWHAH,GPM6A	Ex_3/3_down
GO:BP	learning or memory	GO:0007611	0.00193341	2.71368	270	169	11	18017	GRIN1,APOE,RELN,B2M,SGK1,PRNP,CSMD1,TNR,NDRG4,SLC24A2,GRM5	Ex_3/3_up		GO:BP	positive regulation of cellular component organization	GO:0051130	0.000169274	3.77141	1226	31	11	18017	HSP90AA1,AHI1,MAP1B,CCK,KALRN,CLASP2,APP,PLCB1,STMN2,YWHAH,GPM6A	Ex_3/3_down
GO:BP	regulation of synapse structure or activity	GO:0050803	0.00202694	2.69316	225	169	10	18017	GRIN1,APOE,RELN,CAMK2B,CBLN2,PRNP,ROBO2,GRID2,ADGRL3,PTPRD	Ex_3/3_up		GO:BP	neural nucleus development	GO:0048857	0.0002024	3.69379	64	31	4	18017	CALM1,DYNLL1,CKB,YWHAH	Ex_3/3_down
GO:BP	cellular component organization	GO:0016043	0.00202694	2.69316	6499	169	86	18017	DHFR,LINGO1,PLP1,SPP1,GRIN1,APOE,C10ORF90,RELN,ARHGAP24,CNP,FBXL7,DOCK10,HIP1,B2M,CLMN,NCKAP5,TF,NFIA,CDH20,PCDH15,CLDN11,ALCAM,ABCA2,ERBB4,ADGRV1,SLC1A2,DLC1,CRYAB,PIP4K2A,PITPNC1,SGK1,TMEM165,SGCZ,SHTN1,FCHSD2,ANO4,MBP,CAMK2B,LAMA2,MAN2A1,ZEB2,FRYL,CBLN2,NCAM2,TMEFF2,UNC5C,ROBO1,NRG1,CLU,GAB1,MEF2A,KCTD16,CNTN5,ZSWIM6,PRNP,ROBO2,DNAJC6,MAP4K4,CADM1,PTPRK,CDH12,TNR,GRID2,NEGR1,ADGRL3,LRRTM4,SSH2…	Ex_3/3_up		GO:BP	positive regulation of molecular function	GO:0044093	0.0002024	3.69379	1833	31	13	18017	CALM1,HSP90AA1,STMN1,DYNLL1,CHN1,TMSB4X,CCK,ATP1B1,KALRN,APP,PLCB1,RGS7,MAPK10	Ex_3/3_down
GO:BP	cell-cell signaling	GO:0007267	0.00219961	2.65765	1806	169	34	18017	PLP1,SPP1,GRIN1,SLC1A3,APOE,RELN,CNP,GRIK1,SLC1A2,RNF220,GPC5,FCHSD2,MBP,CAMK2B,LAMA2,ITPR2,ZEB2,CBLN2,GRM3,PRNP,MAP4K4,CADM1,TNR,GRID2,PLCL1,WWOX,KCND2,DTNA,PTPRD,DLG2,NRG3,SLC24A2,GRM5,DCC	Ex_3/3_up		GO:BP	positive regulation of hydrolase activity	GO:0051345	0.0002024	3.69379	775	31	9	18017	CALM1,DYNLL1,CHN1,CCK,ATP1B1,KALRN,APP,PLCB1,RGS7	Ex_3/3_down
GO:BP	regulation of cellular component organization	GO:0051128	0.00219961	2.65765	2450	169	42	18017	LINGO1,SPP1,GRIN1,APOE,C10ORF90,RELN,ARHGAP24,HIP1,B2M,TF,ABCA2,DLC1,CRYAB,PIP4K2A,SGK1,SHTN1,FCHSD2,CAMK2B,ZEB2,CBLN2,TMEFF2,ROBO1,NRG1,CLU,ZSWIM6,PRNP,ROBO2,DNAJC6,MAP4K4,TNR,GRID2,NEGR1,ADGRL3,SSH2,TJP1,SPOCK1,NDRG4,DMD,PTPRD,NRG3,LDLRAD4,DCC	Ex_3/3_up		GO:BP	regulation of cell communication	GO:0010646	0.000204312	3.68971	3659	31	18	18017	CALM1,RTN4,HSP90AA1,STMN1,PEBP1,SNAP25,MAP1B,CHN1,TMSB4X,KALRN,VSNL1,APP,PLCB1,NRXN3,UCHL1,YWHAH,RGS7,MAPK10	Ex_3/3_down
GO:BP	regulation of cell communication	GO:0010646	0.00220356	2.65687	3659	169	56	18017	MTRNR2L8,MTRNR2L12,SPP1,GRIN1,SLC1A3,APOE,RELN,ST18,ARHGAP24,ZNF536,HIP1,TF,MAML2,CHST11,ERBB4,ADGRV1,GRIK1,RNF220,DLC1,GPC5,PIP4K2A,PDE8A,PHLPP1,CAMK2B,LAMA2,ITPR2,ZEB2,GRM3,ROBO1,NRG1,CLU,GAB1,ARAP2,KCTD16,PRNP,ROBO2,MAP4K4,CADM1,FAIM2,TNR,GRID2,PLCL1,GRIA4,WWOX,ARHGAP21,NDRG4,DMD,TCF4,DLG2,NRG3,APLP1,OTUD7A,LDLRAD4,SLC24A2,GRM5,DCC	Ex_3/3_up		GO:BP	brain development	GO:0007420	0.000206606	3.68486	784	31	9	18017	CALM1,RTN4,STMN1,DYNLL1,AHI1,APP,CKB,PLCB1,YWHAH	Ex_3/3_down
GO:BP	negative regulation of neuron differentiation	GO:0045665	0.00224895	2.64802	229	169	10	18017	LINGO1,SPP1,APOE,ZNF536,B2M,MAP4K4,TNR,SPOCK1,DMD,DCC	Ex_3/3_up		GO:BP	regulation of biological quality	GO:0065008	0.000231609	3.63524	4133	31	19	18017	CALM1,RTN4,HSP90AA1,STMN1,SNAP25,FTH1,MAP1B,TMSB4X,CCK,ATP1B1,KALRN,VSNL1,APP,CKB,NRXN3,NRCAM,GPHN,YWHAH,GPM6A	Ex_3/3_down
GO:BP	modulation of age-related behavioral decline	GO:0090647	0.00234322	2.63019	9	169	3	18017	B2M,PRNP,GRM5	Ex_3/3_up		GO:BP	synapse organization	GO:0050808	0.000235038	3.62886	417	31	7	18017	MAP1B,KALRN,APP,NRXN3,NRCAM,GPHN,GPM6A	Ex_3/3_down
GO:BP	negative regulation of cellular component organization	GO:0051129	0.00285076	2.54504	750	169	19	18017	LINGO1,SPP1,APOE,ARHGAP24,B2M,ABCA2,DLC1,CRYAB,TMEFF2,CLU,PRNP,ROBO2,MAP4K4,TNR,SSH2,TJP1,SPOCK1,LDLRAD4,DCC	Ex_3/3_up		GO:BP	regulation of transport	GO:0051049	0.000235038	3.62886	1887	31	13	18017	CALM1,SNAP25,AHI1,MAP1B,TMSB4X,CCK,ATP1B1,KALRN,VSNL1,CLASP2,APP,NRXN3,YWHAH	Ex_3/3_down
GO:BP	regulation of signaling	GO:0023051	0.00285076	2.54504	3699	169	56	18017	MTRNR2L8,MTRNR2L12,SPP1,GRIN1,SLC1A3,APOE,RELN,ST18,ARHGAP24,ZNF536,HIP1,TF,MAML2,CHST11,ERBB4,ADGRV1,GRIK1,RNF220,DLC1,GPC5,PIP4K2A,PDE8A,PHLPP1,CAMK2B,LAMA2,ITPR2,ZEB2,GRM3,ROBO1,NRG1,CLU,GAB1,ARAP2,KCTD16,PRNP,ROBO2,MAP4K4,CADM1,FAIM2,TNR,GRID2,PLCL1,GRIA4,WWOX,ARHGAP21,NDRG4,DMD,TCF4,DLG2,NRG3,APLP1,OTUD7A,LDLRAD4,SLC24A2,GRM5,DCC	Ex_3/3_up		GO:BP	learning or memory	GO:0007611	0.000235038	3.62886	270	31	6	18017	SNAP25,CCK,KALRN,APP,PLCB1,NRXN3	Ex_3/3_down
GO:BP	ionotropic glutamate receptor signaling pathway	GO:0035235	0.00285076	2.54504	25	169	4	18017	GRIN1,GRIK1,GRID2,GRIA4	Ex_3/3_up		GO:BP	system development	GO:0048731	0.000235038	3.62886	5096	31	21	18017	CALM1,RTN4,HSP90AA1,STMN1,SNAP25,DYNLL1,AHI1,MAP1B,CHN1,CCK,KALRN,CLASP2,APP,CKB,PLCB1,NRXN3,STMN2,NRCAM,UCHL1,YWHAH,GPM6A	Ex_3/3_down
GO:BP	negative chemotaxis	GO:0050919	0.00291035	2.53606	48	169	5	18017	UNC5C,ROBO1,NRG1,ROBO2,NRG3	Ex_3/3_up		GO:BP	cellular component organization or biogenesis	GO:0071840	0.000235038	3.62886	6686	31	24	18017	CALM1,RTN4,HSP90AA1,STMN1,SNAP25,TUBA1B,DYNLL1,AHI1,MAP1B,CHN1,TMSB4X,CCK,ATP1B1,KALRN,CLASP2,APP,PLCB1,NRXN3,STMN2,NRCAM,UCHL1,GPHN,YWHAH,GPM6A	Ex_3/3_down
GO:BP	positive regulation of neuron differentiation	GO:0045666	0.00293662	2.53215	392	169	13	18017	APOE,RELN,SHTN1,CAMK2B,ZEB2,TCF12,ROBO1,ROBO2,NEGR1,NDRG4,DMD,TCF4,PTPRD	Ex_3/3_up		GO:BP	learning	GO:0007612	0.000238292	3.62289	154	31	5	18017	SNAP25,CCK,KALRN,APP,NRXN3	Ex_3/3_down
GO:BP	negative regulation of negative chemotaxis	GO:0050925	0.00295057	2.53009	2	169	2	18017	ROBO1,ROBO2	Ex_3/3_up		GO:BP	behavior	GO:0007610	0.000266795	3.57382	615	31	8	18017	SNAP25,AHI1,CCK,KALRN,APP,PLCB1,NRXN3,UCHL1	Ex_3/3_down
GO:BP	regulation of multicellular organismal process	GO:0051239	0.00295894	2.52886	3441	169	53	18017	LINGO1,SPP1,GRIN1,APOE,RELN,PTGDS,ZNF536,DOCK5,B2M,TF,ERBB4,ADGRV1,ZBTB20,POLR2F,SGK1,SHTN1,PHLPP1,MBP,CAMK2B,LAMA2,MAN2A1,ITPR2,ZEB2,CBLN2,TCF12,CTNNA3,ROBO1,NRG1,CLU,GAB1,MEF2A,ZSWIM6,PRNP,KCNIP4,ROBO2,MAP4K4,CADM1,PDE4B,TNR,GRID2,NEGR1,PLCL1,ADGRL3,TJP1,SPOCK1,NDRG4,KCND2,DMD,TCF4,PTPRD,NRG3,LDLRAD4,DCC	Ex_3/3_up		GO:BP	head development	GO:0060322	0.000270011	3.56862	829	31	9	18017	CALM1,RTN4,STMN1,DYNLL1,AHI1,APP,CKB,PLCB1,YWHAH	Ex_3/3_down
GO:BP	regulation of synaptic plasticity	GO:0048167	0.00328139	2.48394	196	169	9	18017	GRIN1,APOE,RELN,CAMK2B,PRNP,TNR,GRID2,SLC24A2,GRM5	Ex_3/3_up		GO:BP	negative regulation of supramolecular fiber organization	GO:1902904	0.000271155	3.56678	160	31	5	18017	STMN1,MAP1B,TMSB4X,CLASP2,STMN2	Ex_3/3_down
GO:BP	regulation of cell junction assembly	GO:1901888	0.0033784	2.47129	197	169	9	18017	GRIN1,DLC1,CBLN2,ROBO2,MAP4K4,GRID2,ADGRL3,TJP1,PTPRD	Ex_3/3_up		GO:BP	secretion	GO:0046903	0.000280482	3.5521	1625	31	12	18017	CALM1,HSP90AA1,SNAP25,FTH1,DYNLL1,TMSB4X,CCK,KALRN,VSNL1,CLASP2,APP,NRXN3	Ex_3/3_down
GO:BP	small GTPase mediated signal transduction	GO:0007264	0.00342988	2.46472	515	169	15	18017	RASGEF1B,APOE,RELN,DOCK8,ARHGAP24,DOCK5,DOCK10,DLC1,SHTN1,ROBO1,NRG1,ARAP2,MAP4K4,ARHGAP21,ELMO1	Ex_3/3_up		GO:BP	microtubule polymerization	GO:0046785	0.000301603	3.52056	76	31	4	18017	STMN1,MAP1B,CLASP2,STMN2	Ex_3/3_down
GO:BP	transmembrane transport	GO:0055085	0.00357963	2.44616	1632	169	31	18017	SLC26A3,GRIN1,SLC1A3,KCNH8,SLC5A11,RELN,TMEM144,ABCA2,SLC9A9,GRIK1,SLC1A2,SGK1,TMEM165,ANO4,SLCO3A1,ITPR2,CLU,MEF2A,SLC44A1,PRNP,KCNIP4,PDE4B,GRID2,GRIA4,KCND2,DMD,DLG2,SLC24A2,GRM5,KCNQ5,DPP10	Ex_3/3_up		GO:BP	negative regulation of cytoskeleton organization	GO:0051494	0.000316382	3.49979	167	31	5	18017	STMN1,MAP1B,TMSB4X,CLASP2,STMN2	Ex_3/3_down
GO:BP	negative regulation of neuron projection development	GO:0010977	0.00357963	2.44616	156	169	8	18017	LINGO1,SPP1,APOE,B2M,MAP4K4,TNR,SPOCK1,DCC	Ex_3/3_up		GO:BP	microtubule-based process	GO:0007017	0.000344635	3.46264	864	31	9	18017	CALM1,STMN1,TUBA1B,DYNLL1,MAP1B,CLASP2,APP,STMN2,UCHL1	Ex_3/3_down
GO:BP	positive regulation of neuron projection development	GO:0010976	0.00357963	2.44616	296	169	11	18017	APOE,RELN,SHTN1,CAMK2B,ZEB2,ROBO1,ROBO2,NEGR1,NDRG4,DMD,PTPRD	Ex_3/3_up		GO:BP	regulation of neurogenesis	GO:0050767	0.00034839	3.45793	867	31	9	18017	RTN4,SNAP25,MAP1B,CHN1,KALRN,APP,STMN2,NRCAM,YWHAH	Ex_3/3_down
GO:BP	positive regulation of cell morphogenesis involved in differentiation	GO:0010770	0.0038748	2.41175	158	169	8	18017	RELN,DOCK5,SHTN1,CAMK2B,ZEB2,ROBO1,ROBO2,PTPRD	Ex_3/3_up		GO:BP	protein polymerization	GO:0051258	0.000364256	3.43859	302	31	6	18017	HSP90AA1,STMN1,MAP1B,TMSB4X,CLASP2,STMN2	Ex_3/3_down
GO:BP	startle response	GO:0001964	0.00397385	2.40079	28	169	4	18017	GRIN1,PCDH15,CSMD1,GRID2	Ex_3/3_up		GO:BP	localization	GO:0051179	0.000364655	3.43812	6920	31	24	18017	CALM1,RTN4,HSP90AA1,STMN1,SNAP25,FTH1,TUBA1B,DYNLL1,AHI1,MAP1B,TMSB4X,CCK,ATP1B1,KALRN,VSNL1,CLASP2,APP,PLCB1,NRXN3,NRCAM,UCHL1,GPHN,YWHAH,GPM6A	Ex_3/3_down
GO:BP	circulatory system process	GO:0003013	0.0040594	2.39154	649	169	17	18017	SLC1A3,APOE,DOCK5,ABCA2,SLC1A2,SGK1,SGCZ,SLCO3A1,ITPR2,CTNNA3,MEF2A,SLC44A1,KCNIP4,PDE4B,TJP1,KCND2,DMD	Ex_3/3_up		GO:BP	regulation of molecular function	GO:0065009	0.000375578	3.4253	3084	31	16	18017	CALM1,HSP90AA1,STMN1,PEBP1,DYNLL1,CHN1,TMSB4X,CCK,ATP1B1,KALRN,APP,PLCB1,UCHL1,YWHAH,RGS7,MAPK10	Ex_3/3_down
GO:BP	ion transport	GO:0006811	0.00428618	2.36793	1730	169	32	18017	SLC26A3,GRIN1,SLC1A3,APOE,KCNH8,SLC5A11,RELN,B2M,TF,SLC9A9,GRIK1,SLC1A2,PITPNC1,SGK1,TMEM165,ANO4,SLCO3A1,CAMK2B,ITPR2,SLC44A1,PRNP,KCNIP4,PDE4B,GRID2,GRIA4,KCND2,DMD,DLG2,SLC24A2,GRM5,KCNQ5,DPP10	Ex_3/3_up		GO:BP	cognition	GO:0050890	0.000417444	3.3794	312	31	6	18017	SNAP25,CCK,KALRN,APP,PLCB1,NRXN3	Ex_3/3_down
GO:BP	system process	GO:0003008	0.00461079	2.33622	2303	169	39	18017	SLC26A3,GRIN1,SLC1A3,APOE,RELN,DOCK5,B2M,LHFPL3,PCDH15,ABCA2,ADGRV1,SLC1A2,CRYAB,SGK1,SGCZ,MBP,PDE1C,SLCO3A1,CAMK2B,ITPR2,NCAM2,CTNNA3,MEF2A,CNTN5,SLC44A1,PRNP,CSMD1,KCNIP4,PDE4B,TNR,GRID2,TJP1,NDRG4,KCND2,DMD,DTNA,DLG2,SLC24A2,GRM5	Ex_3/3_up		GO:BP	regulation of cell morphogenesis involved in differentiation	GO:0010769	0.00041845	3.37836	313	31	6	18017	RTN4,MAP1B,CHN1,KALRN,NRCAM,YWHAH	Ex_3/3_down
GO:BP	olfactory bulb interneuron differentiation	GO:0021889	0.00493401	2.3068	12	169	3	18017	ERBB4,ROBO1,ROBO2	Ex_3/3_up		GO:BP	synapse assembly	GO:0007416	0.000418519	3.37828	182	31	5	18017	MAP1B,APP,NRXN3,NRCAM,GPM6A	Ex_3/3_down
GO:BP	cellular component organization or biogenesis	GO:0071840	0.00493401	2.3068	6686	169	86	18017	DHFR,LINGO1,PLP1,SPP1,GRIN1,APOE,C10ORF90,RELN,ARHGAP24,CNP,FBXL7,DOCK10,HIP1,B2M,CLMN,NCKAP5,TF,NFIA,CDH20,PCDH15,CLDN11,ALCAM,ABCA2,ERBB4,ADGRV1,SLC1A2,DLC1,CRYAB,PIP4K2A,PITPNC1,SGK1,TMEM165,SGCZ,SHTN1,FCHSD2,ANO4,MBP,CAMK2B,LAMA2,MAN2A1,ZEB2,FRYL,CBLN2,NCAM2,TMEFF2,UNC5C,ROBO1,NRG1,CLU,GAB1,MEF2A,KCTD16,CNTN5,ZSWIM6,PRNP,ROBO2,DNAJC6,MAP4K4,CADM1,PTPRK,CDH12,TNR,GRID2,NEGR1,ADGRL3,LRRTM4,SSH2…	Ex_3/3_up		GO:BP	regulation of microtubule polymerization or depolymerization	GO:0031110	0.000418519	3.37828	86	31	4	18017	STMN1,MAP1B,CLASP2,STMN2	Ex_3/3_down
GO:BP	transport across blood-brain barrier	GO:0150104	0.00493401	2.3068	87	169	6	18017	SLC1A3,APOE,ABCA2,SLC1A2,SLCO3A1,SLC44A1	Ex_3/3_up		GO:BP	negative regulation of microtubule depolymerization	GO:0007026	0.00043851	3.35802	28	31	3	18017	MAP1B,CLASP2,STMN2	Ex_3/3_down
GO:BP	vascular transport	GO:0010232	0.00514699	2.28845	88	169	6	18017	SLC1A3,APOE,ABCA2,SLC1A2,SLCO3A1,SLC44A1	Ex_3/3_up		GO:BP	regulation of catalytic activity	GO:0050790	0.000453095	3.34381	2402	31	14	18017	CALM1,HSP90AA1,PEBP1,DYNLL1,CHN1,TMSB4X,CCK,ATP1B1,KALRN,APP,PLCB1,UCHL1,RGS7,MAPK10	Ex_3/3_down
GO:BP	cognition	GO:0050890	0.00514699	2.28845	312	169	11	18017	GRIN1,APOE,RELN,B2M,SGK1,PRNP,CSMD1,TNR,NDRG4,SLC24A2,GRM5	Ex_3/3_up		GO:BP	establishment of localization in cell	GO:0051649	0.000473785	3.32442	2779	31	15	18017	CALM1,HSP90AA1,SNAP25,FTH1,TUBA1B,DYNLL1,MAP1B,TMSB4X,ATP1B1,VSNL1,CLASP2,APP,NRXN3,UCHL1,YWHAH	Ex_3/3_down
GO:BP	forebrain neuron differentiation	GO:0021879	0.00514699	2.28845	56	169	5	18017	B2M,ERBB4,ROBO1,ZSWIM6,ROBO2	Ex_3/3_up		GO:BP	cell junction organization	GO:0034330	0.000524584	3.28018	703	31	8	18017	MAP1B,KALRN,CLASP2,APP,NRXN3,NRCAM,GPHN,GPM6A	Ex_3/3_down
GO:BP	memory	GO:0007613	0.00557014	2.25413	127	169	7	18017	GRIN1,APOE,RELN,SGK1,PRNP,CSMD1,SLC24A2	Ex_3/3_up		GO:BP	midbrain development	GO:0030901	0.000530438	3.27537	93	31	4	18017	CALM1,DYNLL1,CKB,YWHAH	Ex_3/3_down
GO:BP	netrin-activated signaling pathway	GO:0038007	0.00604301	2.21875	13	169	3	18017	SHTN1,UNC5C,DCC	Ex_3/3_up		GO:BP	anatomical structure morphogenesis	GO:0009653	0.000608555	3.2157	2849	31	15	18017	RTN4,HSP90AA1,STMN1,AHI1,MAP1B,CHN1,CCK,KALRN,CLASP2,APP,NRXN3,NRCAM,UCHL1,YWHAH,GPM6A	Ex_3/3_down
GO:BP	negative regulation of neuron migration	GO:2001223	0.00604301	2.21875	13	169	3	18017	ERBB4,NRG1,NRG3	Ex_3/3_up		GO:BP	regulation of microtubule depolymerization	GO:0031114	0.000608555	3.2157	32	31	3	18017	MAP1B,CLASP2,STMN2	Ex_3/3_down
GO:BP	positive regulation of synaptic transmission	GO:0050806	0.00615422	2.21083	172	169	8	18017	GRIN1,SLC1A3,APOE,RELN,LAMA2,PRNP,TNR,SLC24A2	Ex_3/3_up		GO:BP	cytoskeleton-dependent intracellular transport	GO:0030705	0.000611331	3.21372	202	31	5	18017	TUBA1B,DYNLL1,MAP1B,APP,UCHL1	Ex_3/3_down
GO:BP	regulation of amyloid-beta formation	GO:1902003	0.00679258	2.16796	33	169	4	18017	APOE,ABCA2,CLU,PRNP	Ex_3/3_up		GO:BP	regulation of nervous system development	GO:0051960	0.000717561	3.14414	978	31	9	18017	RTN4,SNAP25,MAP1B,CHN1,KALRN,APP,STMN2,NRCAM,YWHAH	Ex_3/3_down
GO:BP	potassium ion transmembrane transport	GO:0071805	0.00690808	2.16064	223	169	9	18017	SLC1A3,KCNH8,SLC9A9,PRNP,KCNIP4,KCND2,SLC24A2,KCNQ5,DPP10	Ex_3/3_up		GO:BP	regulation of cellular component biogenesis	GO:0044087	0.000773652	3.11145	989	31	9	18017	HSP90AA1,STMN1,MAP1B,TMSB4X,CCK,CLASP2,APP,STMN2,GPM6A	Ex_3/3_down
GO:BP	chemorepulsion involved in interneuron migration from the subpallium to the cortex	GO:0021842	0.00690808	2.16064	3	169	2	18017	NRG1,NRG3	Ex_3/3_up		GO:BP	anatomical structure development	GO:0048856	0.000788495	3.1032	6143	31	22	18017	CALM1,SPARCL1,RTN4,HSP90AA1,STMN1,SNAP25,DYNLL1,AHI1,MAP1B,CHN1,CCK,KALRN,CLASP2,APP,CKB,PLCB1,NRXN3,STMN2,NRCAM,UCHL1,YWHAH,GPM6A	Ex_3/3_down
GO:BP	positive regulation of low-density lipoprotein particle receptor catabolic process	GO:0032805	0.00690808	2.16064	3	169	2	18017	APOE,ABCA2	Ex_3/3_up		GO:BP	transmembrane receptor protein tyrosine kinase signaling pathway	GO:0007169	0.000829445	3.08121	762	31	8	18017	RTN4,HSP90AA1,STMN1,AHI1,CHN1,KALRN,APP,PLCB1	Ex_3/3_down
GO:BP	regulation of intracellular calcium activated chloride channel activity	GO:1902938	0.00690808	2.16064	3	169	2	18017	PRNP,GRM5	Ex_3/3_up		GO:BP	multicellular organism development	GO:0007275	0.000829445	3.08121	5638	31	21	18017	CALM1,RTN4,HSP90AA1,STMN1,SNAP25,DYNLL1,AHI1,MAP1B,CHN1,CCK,KALRN,CLASP2,APP,CKB,PLCB1,NRXN3,STMN2,NRCAM,UCHL1,YWHAH,GPM6A	Ex_3/3_down
GO:BP	directional guidance of interneurons involved in migration from the subpallium to the cortex	GO:0021840	0.00690808	2.16064	3	169	2	18017	NRG1,NRG3	Ex_3/3_up		GO:BP	regulation of cell development	GO:0060284	0.000840845	3.07528	1006	31	9	18017	RTN4,SNAP25,MAP1B,CHN1,KALRN,APP,STMN2,NRCAM,YWHAH	Ex_3/3_down
GO:BP	telencephalon cell migration	GO:0022029	0.00698056	2.15611	61	169	5	18017	RELN,ROBO1,NRG1,TNR,NRG3	Ex_3/3_up		GO:BP	regulation of intracellular signal transduction	GO:1902531	0.000854672	3.0682	1883	31	12	18017	CALM1,RTN4,HSP90AA1,STMN1,PEBP1,CHN1,TMSB4X,KALRN,APP,PLCB1,UCHL1,MAPK10	Ex_3/3_down
GO:BP	ion transmembrane transport	GO:0034220	0.00705953	2.15122	1179	169	24	18017	SLC26A3,GRIN1,SLC1A3,KCNH8,RELN,SLC9A9,GRIK1,SLC1A2,SGK1,TMEM165,ANO4,ITPR2,PRNP,KCNIP4,PDE4B,GRID2,GRIA4,KCND2,DMD,DLG2,SLC24A2,GRM5,KCNQ5,DPP10	Ex_3/3_up		GO:BP	regulated exocytosis	GO:0045055	0.000935409	3.029	779	31	8	18017	CALM1,HSP90AA1,SNAP25,FTH1,DYNLL1,TMSB4X,APP,NRXN3	Ex_3/3_down
GO:BP	negative regulation of amyloid-beta formation	GO:1902430	0.00705953	2.15122	14	169	3	18017	APOE,CLU,PRNP	Ex_3/3_up		GO:BP	regulation of supramolecular fiber organization	GO:1902903	0.000950135	3.02221	380	31	6	18017	STMN1,MAP1B,TMSB4X,CLASP2,APP,STMN2	Ex_3/3_down
GO:BP	positive regulation of neurogenesis	GO:0050769	0.00706248	2.15104	501	169	14	18017	APOE,RELN,SHTN1,CAMK2B,MAN2A1,ZEB2,TCF12,ROBO1,ROBO2,NEGR1,NDRG4,DMD,TCF4,PTPRD	Ex_3/3_up		GO:BP	cellular component assembly	GO:0022607	0.000950135	3.02221	2989	31	15	18017	RTN4,HSP90AA1,STMN1,SNAP25,DYNLL1,AHI1,MAP1B,TMSB4X,CCK,CLASP2,APP,NRXN3,STMN2,NRCAM,GPM6A	Ex_3/3_down
GO:BP	maintenance of blood-brain barrier	GO:0035633	0.00792644	2.10092	35	169	4	18017	MBP,LAMA2,TJP1,DMD	Ex_3/3_up		GO:BP	signaling	GO:0023052	0.000981581	3.00807	6814	31	23	18017	CALM1,SPARCL1,RTN4,HSP90AA1,STMN1,PEBP1,SNAP25,AHI1,MAP1B,CHN1,TMSB4X,CCK,ATP1B1,KALRN,VSNL1,APP,PLCB1,NRXN3,NRCAM,UCHL1,YWHAH,RGS7,MAPK10	Ex_3/3_down
GO:BP	forebrain cell migration	GO:0021885	0.0083605	2.07777	64	169	5	18017	RELN,ROBO1,NRG1,TNR,NRG3	Ex_3/3_up		GO:BP	regulation of hydrolase activity	GO:0051336	0.000981581	3.00807	1307	31	10	18017	CALM1,PEBP1,DYNLL1,CHN1,CCK,ATP1B1,KALRN,APP,PLCB1,RGS7	Ex_3/3_down
GO:BP	cellular component maintenance	GO:0043954	0.0083605	2.07777	64	169	5	18017	APOE,CBLN2,PRNP,TJP1,DLG2	Ex_3/3_up		GO:BP	cell communication	GO:0007154	0.00100073	2.99968	6828	31	23	18017	CALM1,SPARCL1,RTN4,HSP90AA1,STMN1,PEBP1,SNAP25,AHI1,MAP1B,CHN1,TMSB4X,CCK,ATP1B1,KALRN,VSNL1,APP,PLCB1,NRXN3,NRCAM,UCHL1,YWHAH,RGS7,MAPK10	Ex_3/3_down
GO:BP	regulation of glutamate receptor signaling pathway	GO:1900449	0.00892361	2.04946	65	169	5	18017	GRIN1,RELN,PRNP,GRIA4,DLG2	Ex_3/3_up		GO:BP	protein depolymerization	GO:0051261	0.00102098	2.99098	116	31	4	18017	STMN1,MAP1B,CLASP2,STMN2	Ex_3/3_down
GO:BP	regulation of synapse assembly	GO:0051963	0.00927768	2.03256	101	169	6	18017	GRIN1,CBLN2,ROBO2,GRID2,ADGRL3,PTPRD	Ex_3/3_up		GO:BP	regulation of protein polymerization	GO:0032271	0.00102719	2.98835	234	31	5	18017	HSP90AA1,STMN1,MAP1B,TMSB4X,STMN2	Ex_3/3_down
GO:BP	axon guidance	GO:0007411	0.00927768	2.03256	286	169	10	18017	RELN,ALCAM,LAMA2,UNC5C,ROBO1,GAB1,ZSWIM6,ROBO2,TNR,DCC	Ex_3/3_up		GO:BP	microtubule polymerization or depolymerization	GO:0031109	0.00103239	2.98616	117	31	4	18017	STMN1,MAP1B,CLASP2,STMN2	Ex_3/3_down
GO:BP	forebrain generation of neurons	GO:0021872	0.00930302	2.03138	66	169	5	18017	B2M,ERBB4,ROBO1,ZSWIM6,ROBO2	Ex_3/3_up		GO:BP	regulation of multicellular organismal process	GO:0051239	0.00106271	2.97358	3441	31	16	18017	CALM1,RTN4,SNAP25,AHI1,MAP1B,CHN1,TMSB4X,CCK,ATP1B1,KALRN,CLASP2,APP,PLCB1,STMN2,NRCAM,YWHAH	Ex_3/3_down
GO:BP	neuron projection guidance	GO:0097485	0.00930302	2.03138	287	169	10	18017	RELN,ALCAM,LAMA2,UNC5C,ROBO1,GAB1,ZSWIM6,ROBO2,TNR,DCC	Ex_3/3_up		GO:BP	developmental cell growth	GO:0048588	0.00114324	2.94186	241	31	5	18017	RTN4,HSP90AA1,MAP1B,APP,NRCAM	Ex_3/3_down
GO:BP	regulation of NMDA receptor activity	GO:2000310	0.00930302	2.03138	37	169	4	18017	GRIN1,RELN,GRIA4,DLG2	Ex_3/3_up		GO:BP	developmental growth involved in morphogenesis	GO:0060560	0.00115341	2.93801	242	31	5	18017	RTN4,HSP90AA1,MAP1B,APP,NRCAM	Ex_3/3_down
GO:BP	regulation of cellular component biogenesis	GO:0044087	0.00930302	2.03138	989	169	21	18017	GRIN1,APOE,C10ORF90,ARHGAP24,ABCA2,DLC1,CRYAB,PIP4K2A,FCHSD2,CBLN2,TMEFF2,NRG1,CLU,ROBO2,MAP4K4,GRID2,ADGRL3,SSH2,TJP1,PTPRD,LDLRAD4	Ex_3/3_up		GO:BP	regulation of cell differentiation	GO:0045595	0.0011915	2.9239	1976	31	12	18017	RTN4,SNAP25,AHI1,MAP1B,CHN1,KALRN,CLASP2,APP,PLCB1,STMN2,NRCAM,YWHAH	Ex_3/3_down
GO:BP	adherens junction organization	GO:0034332	0.00948976	2.02274	67	169	5	18017	CDH20,CADM1,CDH12,TJP1,CADM2	Ex_3/3_up		GO:BP	axon extension	GO:0048675	0.00122727	2.91106	124	31	4	18017	RTN4,HSP90AA1,MAP1B,NRCAM	Ex_3/3_down
GO:BP	negative regulation of neuron projection regeneration	GO:0070571	0.00948976	2.02274	16	169	3	18017	SPP1,MAP4K4,TNR	Ex_3/3_up		GO:BP	cell differentiation	GO:0030154	0.00129921	2.88632	4388	31	18	18017	RTN4,HSP90AA1,STMN1,SNAP25,AHI1,MAP1B,CHN1,CCK,KALRN,CLASP2,APP,PLCB1,NRXN3,STMN2,NRCAM,UCHL1,YWHAH,GPM6A	Ex_3/3_down
GO:BP	negative regulation of locomotion	GO:0040013	0.00948976	2.02274	401	169	12	18017	APOE,ERBB4,DLC1,SPOCK3,TMEFF2,ROBO1,NRG1,ROBO2,PTPRK,NDRG4,NRG3,LDLRAD4	Ex_3/3_up		GO:BP	locomotion	GO:0040011	0.00142125	2.84733	2020	31	12	18017	RTN4,MAP1B,CHN1,TMSB4X,CCK,ATP1B1,CLASP2,APP,PLCB1,NRXN3,NRCAM,GPM6A	Ex_3/3_down
GO:BP	axon ensheathment	GO:0008366	0.00948976	2.02274	143	169	7	18017	PLP1,QKI,CLDN11,ABCA2,MBP,NRG1,CLU	Ex_3/3_up		GO:BP	modulation of chemical synaptic transmission	GO:0050804	0.00142125	2.84733	420	31	6	18017	CALM1,SNAP25,MAP1B,APP,NRXN3,YWHAH	Ex_3/3_down
GO:BP	nucleotide catabolic process	GO:0009166	0.00948976	2.02274	67	169	5	18017	CNP,PDE8A,PDE1A,PDE4B,FHIT	Ex_3/3_up		GO:BP	regulation of trans-synaptic signaling	GO:0099177	0.0014247	2.84628	421	31	6	18017	CALM1,SNAP25,MAP1B,APP,NRXN3,YWHAH	Ex_3/3_down
GO:BP	ensheathment of neurons	GO:0007272	0.00948976	2.02274	143	169	7	18017	PLP1,QKI,CLDN11,ABCA2,MBP,NRG1,CLU	Ex_3/3_up		GO:BP	G2/M transition of mitotic cell cycle	GO:0000086	0.00150688	2.82192	260	31	5	18017	CALM1,HSP90AA1,DYNLL1,APP,PLCB1	Ex_3/3_down
GO:BP	regulation of receptor-mediated endocytosis	GO:0048259	0.00955161	2.01992	103	169	6	18017	HIP1,B2M,TF,ABCA2,CLU,DNAJC6	Ex_3/3_up		GO:BP	cellular developmental process	GO:0048869	0.00158077	2.80113	4468	31	18	18017	RTN4,HSP90AA1,STMN1,SNAP25,AHI1,MAP1B,CHN1,CCK,KALRN,CLASP2,APP,PLCB1,NRXN3,STMN2,NRCAM,UCHL1,YWHAH,GPM6A	Ex_3/3_down
GO:BP	positive regulation of cell development	GO:0010720	0.009554	2.01981	586	169	15	18017	APOE,RELN,DOCK5,SHTN1,CAMK2B,MAN2A1,ZEB2,TCF12,ROBO1,ROBO2,NEGR1,NDRG4,DMD,TCF4,PTPRD	Ex_3/3_up		GO:BP	neuromuscular junction development	GO:0007528	0.00158077	2.80113	49	31	3	18017	KALRN,APP,GPHN	Ex_3/3_down
GO:BP	intracellular signal transduction	GO:0035556	0.00977725	2.00978	2854	169	44	18017	RASGEF1B,GRIN1,APOE,RELN,DOCK8,ARHGAP24,DOCK5,DOCK10,HIP1,TF,ERBB4,ADGRV1,DLC1,CRYAB,PIP4K2A,SGK1,SHTN1,PDE8A,PHLPP1,MBP,ITPR2,ZEB2,ROBO1,NRG1,CLU,GAB1,ARAP2,MEF2A,PRNP,MAP4K4,FHIT,PLCL1,ADGRL3,WWOX,ARHGAP21,TJP1,NDRG4,DMD,ELMO1,DLG2,NRG3,APLP1,OTUD7A,GRM5	Ex_3/3_up		GO:BP	cell junction assembly	GO:0034329	0.00164044	2.78504	435	31	6	18017	MAP1B,CLASP2,APP,NRXN3,NRCAM,GPM6A	Ex_3/3_down
GO:BP	regulation of transmembrane transport	GO:0034762	0.00994478	2.0024	589	169	15	18017	GRIN1,KCNH8,RELN,SLC1A2,MEF2A,PRNP,KCNIP4,PDE4B,GRIA4,KCND2,DMD,DLG2,GRM5,KCNQ5,DPP10	Ex_3/3_up		GO:BP	neuron recognition	GO:0008038	0.00164741	2.7832	50	31	3	18017	RTN4,APP,NRCAM	Ex_3/3_down
GO:CC	cell junction	GO:0030054	4.2791e-17	16.3686	2058	173	64	18956	PLP1,GRIN1,SLC1A3,APOE,APBB1IP,ARHGAP24,FRMD4B,CNP,DOCK10,HIP1,B2M,QKI,NFIA,CDH20,PCDH15,CLDN11,ALCAM,ERBB4,ADGRV1,GRIK1,SLC1A2,DLC1,CRYAB,FCHSD2,MBP,CAMK2B,LAMA2,CBLN2,GRM3,CTNNA3,UNC5C,NRG1,CLU,GAB1,KCTD16,CNTN5,PRNP,DNAJC6,MAP4K4,CADM1,PTPRK,CDH12,PDE4B,FAIM2,TNR,GRID2,GRIA4,ADGRL3,LRRTM4,ARHGAP21,TJP1,SPOCK1,KCND2,DMD,CADM2,DTNA,PTPRD,DLG2,NRG3,GRM5,KAZN,DST,DCC,KIRREL3	Ex_3/3_up		GO:BP	regulation of ion transmembrane transporter activity	GO:0032412	0.0016558	2.78099	268	31	5	18017	CALM1,TMSB4X,ATP1B1,APP,YWHAH	Ex_3/3_down
GO:CC	synapse	GO:0045202	1.04367e-13	12.9814	1293	173	46	18956	PLP1,GRIN1,SLC1A3,APOE,CNP,DOCK10,HIP1,QKI,PCDH15,ERBB4,ADGRV1,GRIK1,SLC1A2,CRYAB,FCHSD2,MBP,CAMK2B,LAMA2,CBLN2,GRM3,UNC5C,NRG1,CLU,KCTD16,CNTN5,PRNP,DNAJC6,CADM1,PDE4B,FAIM2,TNR,GRID2,GRIA4,ADGRL3,LRRTM4,SPOCK1,KCND2,DMD,CADM2,DTNA,PTPRD,DLG2,NRG3,GRM5,DCC,KIRREL3	Ex_3/3_up		GO:BP	establishment of protein localization to mitochondrial membrane	GO:0090151	0.00169932	2.76973	51	31	3	18017	CALM1,HSP90AA1,YWHAH	Ex_3/3_down
GO:CC	cell projection	GO:0042995	6.4628e-10	9.18958	2353	173	56	18956	SLC26A3,SPP1,GRIN1,SLC1A3,APOE,APBB1IP,RELN,DOCK8,ARHGAP24,FRMD4B,CNP,DOCK10,PCDH15,CLDN11,ALCAM,ADGRV1,SLC1A2,DLC1,CRYAB,SHTN1,FCHSD2,MBP,PDE1C,CAMK2B,LAMA2,QDPR,NCAM2,GRM3,CTNNA3,UNC5C,ROBO1,NRG1,CLU,KCTD16,ZSWIM6,PRNP,ROBO2,PTPRK,PDE4B,GRID2,GRIA4,ADGRL3,WWOX,TJP1,SPOCK1,NDRG4,SNTG1,KCND2,DMD,CADM2,DTNA,DLG2,GRM5,DST,DCC,KIRREL3	Ex_3/3_up		GO:BP	regulation of microtubule polymerization	GO:0031113	0.00169932	2.76973	51	31	3	18017	STMN1,MAP1B,STMN2	Ex_3/3_down
GO:CC	neuron projection	GO:0043005	1.50057e-09	8.82374	1396	173	41	18956	GRIN1,SLC1A3,APOE,RELN,DOCK10,PCDH15,CLDN11,ALCAM,ADGRV1,SLC1A2,CRYAB,SHTN1,FCHSD2,MBP,CAMK2B,LAMA2,QDPR,NCAM2,GRM3,UNC5C,ROBO1,NRG1,CLU,ZSWIM6,PRNP,ROBO2,PTPRK,PDE4B,GRID2,GRIA4,ADGRL3,SPOCK1,KCND2,DMD,CADM2,DTNA,DLG2,GRM5,DST,DCC,KIRREL3	Ex_3/3_up		GO:BP	protein localization to membrane	GO:0072657	0.00174523	2.75815	649	31	7	18017	CALM1,HSP90AA1,SNAP25,ATP1B1,CLASP2,GPHN,YWHAH	Ex_3/3_down
GO:CC	plasma membrane bounded cell projection	GO:0120025	1.00554e-08	7.9976	2256	173	52	18956	SLC26A3,GRIN1,SLC1A3,APOE,APBB1IP,RELN,DOCK8,FRMD4B,CNP,DOCK10,PCDH15,CLDN11,ALCAM,ADGRV1,SLC1A2,DLC1,CRYAB,SHTN1,FCHSD2,MBP,PDE1C,CAMK2B,LAMA2,QDPR,NCAM2,GRM3,CTNNA3,UNC5C,ROBO1,NRG1,CLU,ZSWIM6,PRNP,ROBO2,PTPRK,PDE4B,GRID2,GRIA4,ADGRL3,WWOX,SPOCK1,NDRG4,SNTG1,KCND2,DMD,CADM2,DTNA,DLG2,GRM5,DST,DCC,KIRREL3	Ex_3/3_up		GO:BP	adult behavior	GO:0030534	0.00181152	2.74196	142	31	4	18017	KALRN,APP,NRXN3,UCHL1	Ex_3/3_down
GO:CC	cell periphery	GO:0071944	2.37942e-08	7.62353	5768	173	92	18956	SLC26A3,LINGO1,PLP1,GRIN1,SLC1A3,APOE,APBB1IP,C10ORF90,KCNH8,SLC5A11,RELN,DOCK8,DOCK5,MOBP,CNP,HIP1,B2M,LHFPL3,TF,CDH20,PCDH15,CLDN11,ALCAM,ABCA2,SLC9A9,ERBB4,ADGRV1,GRIK1,SLC1A2,DLC1,CRYAB,GPC5,PIP4K2A,SGK1,SGCZ,FCHSD2,PHLPP1,ANO4,MBP,SLCO3A1,LAMA2,ITPR2,FRYL,NCAM2,TMEFF2,GRM3,ASTN2,UNC5C,ROBO1,NRG1,CLU,KCTD16,CNTN5,SLC44A1,PRNP,KCNIP4,ROBO2,CADM1,PTPRK,CDH12,PDE4B,FAIM2,GRID2,FHIT,NEGR1,PLCL1,G…	Ex_3/3_up		GO:BP	cellular component biogenesis	GO:0044085	0.00183866	2.7355	3230	31	15	18017	RTN4,HSP90AA1,STMN1,SNAP25,DYNLL1,AHI1,MAP1B,TMSB4X,CCK,CLASP2,APP,NRXN3,STMN2,NRCAM,GPM6A	Ex_3/3_down
GO:CC	plasma membrane	GO:0005886	2.97429e-07	6.52662	5655	173	88	18956	SLC26A3,LINGO1,PLP1,GRIN1,SLC1A3,APOE,APBB1IP,C10ORF90,KCNH8,SLC5A11,RELN,DOCK8,DOCK5,CNP,HIP1,B2M,LHFPL3,TF,CDH20,PCDH15,CLDN11,ALCAM,ABCA2,SLC9A9,ERBB4,ADGRV1,GRIK1,SLC1A2,DLC1,CRYAB,GPC5,PIP4K2A,SGK1,SGCZ,FCHSD2,PHLPP1,ANO4,MBP,SLCO3A1,LAMA2,ITPR2,NCAM2,TMEFF2,GRM3,UNC5C,ROBO1,NRG1,KCTD16,CNTN5,SLC44A1,PRNP,KCNIP4,ROBO2,CADM1,PTPRK,CDH12,PDE4B,FAIM2,GRID2,FHIT,NEGR1,PLCL1,GRIA4,ADGRL3,WWOX,LRR…	Ex_3/3_up		GO:BP	organelle localization	GO:0051640	0.00184448	2.73413	658	31	7	18017	HSP90AA1,SNAP25,DYNLL1,AHI1,MAP1B,CLASP2,UCHL1	Ex_3/3_down
GO:CC	axon	GO:0030424	3.95957e-07	6.40235	658	173	24	18956	GRIN1,CLDN11,ALCAM,SLC1A2,CRYAB,SHTN1,MBP,NCAM2,GRM3,UNC5C,ROBO1,NRG1,PRNP,ROBO2,PTPRK,ADGRL3,SPOCK1,DMD,CADM2,DTNA,DLG2,DST,DCC,KIRREL3	Ex_3/3_up		GO:BP	cell cycle G2/M phase transition	GO:0044839	0.00184448	2.73413	278	31	5	18017	CALM1,HSP90AA1,DYNLL1,APP,PLCB1	Ex_3/3_down
GO:CC	postsynaptic membrane	GO:0045211	6.12472e-07	6.21291	255	173	15	18956	GRIN1,HIP1,ERBB4,GRIK1,GRM3,KCTD16,FAIM2,GRID2,GRIA4,LRRTM4,KCND2,DMD,DLG2,GRM5,DCC	Ex_3/3_up		GO:BP	regulation of transmembrane transporter activity	GO:0022898	0.00185928	2.73066	279	31	5	18017	CALM1,TMSB4X,ATP1B1,APP,YWHAH	Ex_3/3_down
GO:CC	postsynapse	GO:0098794	9.86856e-07	6.00575	591	173	22	18956	GRIN1,DOCK10,HIP1,ERBB4,GRIK1,CRYAB,LAMA2,GRM3,KCTD16,PRNP,DNAJC6,PDE4B,FAIM2,GRID2,GRIA4,LRRTM4,SPOCK1,KCND2,DMD,DLG2,GRM5,DCC	Ex_3/3_up		GO:BP	regulation of protein-containing complex assembly	GO:0043254	0.00189779	2.72175	455	31	6	18017	HSP90AA1,STMN1,MAP1B,TMSB4X,CCK,STMN2	Ex_3/3_down
GO:CC	synaptic membrane	GO:0097060	7.38601e-06	5.13159	358	173	16	18956	GRIN1,HIP1,ERBB4,GRIK1,CRYAB,GRM3,KCTD16,FAIM2,GRID2,GRIA4,LRRTM4,KCND2,DMD,DLG2,GRM5,DCC	Ex_3/3_up		GO:BP	intracellular signal transduction	GO:0035556	0.00191283	2.71832	2854	31	14	18017	CALM1,RTN4,HSP90AA1,STMN1,PEBP1,CHN1,TMSB4X,ATP1B1,KALRN,APP,PLCB1,UCHL1,RGS7,MAPK10	Ex_3/3_down
GO:CC	somatodendritic compartment	GO:0036477	1.35031e-05	4.86957	873	173	25	18956	GRIN1,SLC1A3,APOE,RELN,DOCK10,ALCAM,CRYAB,SHTN1,MBP,PDE1C,LAMA2,GRM3,ASTN2,UNC5C,PDE1A,CLU,PRNP,PTPRK,PDE4B,GRID2,GRIA4,KCND2,DMD,DLG2,KIRREL3	Ex_3/3_up		GO:BP	negative regulation of cellular process	GO:0048523	0.00212524	2.67259	5086	31	19	18017	CALM1,RTN4,STMN1,PEBP1,FTH1,DYNLL1,AHI1,MAP1B,TMSB4X,KALRN,VSNL1,CLASP2,APP,PLCB1,STMN2,UCHL1,YWHAH,RGS7,MAPK10	Ex_3/3_down
GO:CC	plasma membrane region	GO:0098590	1.73923e-05	4.75964	1213	173	30	18956	SLC26A3,GRIN1,SLC1A3,DOCK8,HIP1,TF,ERBB4,ADGRV1,GRIK1,SLC1A2,DLC1,CRYAB,FCHSD2,GRM3,KCTD16,ROBO2,CADM1,FAIM2,GRID2,GRIA4,LRRTM4,TJP1,NDRG4,SNTG1,KCND2,DMD,DLG2,GRM5,DST,DCC	Ex_3/3_up		GO:BP	developmental process	GO:0032502	0.00221781	2.65408	6676	31	22	18017	CALM1,SPARCL1,RTN4,HSP90AA1,STMN1,SNAP25,DYNLL1,AHI1,MAP1B,CHN1,CCK,KALRN,CLASP2,APP,CKB,PLCB1,NRXN3,STMN2,NRCAM,UCHL1,YWHAH,GPM6A	Ex_3/3_down
GO:CC	glutamatergic synapse	GO:0098978	9.21581e-05	4.03547	248	173	12	18956	GRIN1,APOE,HIP1,ERBB4,CBLN2,TNR,GRID2,ADGRL3,KCND2,PTPRD,DLG2,NRG3	Ex_3/3_up		GO:BP	vesicle-mediated transport	GO:0016192	0.00223411	2.65089	2156	31	12	18017	CALM1,HSP90AA1,SNAP25,FTH1,DYNLL1,AHI1,TMSB4X,KALRN,VSNL1,CLASP2,APP,NRXN3	Ex_3/3_down
GO:CC	postsynaptic density	GO:0014069	0.000133386	3.87489	305	173	13	18956	GRIN1,ERBB4,CRYAB,GRM3,PRNP,DNAJC6,PDE4B,SPOCK1,KCND2,DMD,DLG2,GRM5,DCC	Ex_3/3_up		GO:BP	regulation of transporter activity	GO:0032409	0.00225698	2.64647	294	31	5	18017	CALM1,TMSB4X,ATP1B1,APP,YWHAH	Ex_3/3_down
GO:CC	asymmetric synapse	GO:0032279	0.000154435	3.81125	311	173	13	18956	GRIN1,ERBB4,CRYAB,GRM3,PRNP,DNAJC6,PDE4B,SPOCK1,KCND2,DMD,DLG2,GRM5,DCC	Ex_3/3_up		GO:BP	regulation of secretion by cell	GO:1903530	0.00245013	2.61081	697	31	7	18017	CALM1,SNAP25,CCK,KALRN,VSNL1,CLASP2,NRXN3	Ex_3/3_down
GO:CC	postsynaptic specialization	GO:0099572	0.000251074	3.6002	328	173	13	18956	GRIN1,ERBB4,CRYAB,GRM3,PRNP,DNAJC6,PDE4B,SPOCK1,KCND2,DMD,DLG2,GRM5,DCC	Ex_3/3_up		GO:BP	membrane organization	GO:0061024	0.00251849	2.59886	948	31	8	18017	CALM1,RTN4,HSP90AA1,SNAP25,ATP1B1,NRCAM,GPHN,YWHAH	Ex_3/3_down
GO:CC	neuron to neuron synapse	GO:0098984	0.000251074	3.6002	329	173	13	18956	GRIN1,ERBB4,CRYAB,GRM3,PRNP,DNAJC6,PDE4B,SPOCK1,KCND2,DMD,DLG2,GRM5,DCC	Ex_3/3_up		GO:BP	chemical homeostasis	GO:0048878	0.00270265	2.56821	1235	31	9	18017	CALM1,RTN4,STMN1,FTH1,CCK,ATP1B1,VSNL1,APP,CKB	Ex_3/3_down
GO:CC	plasma membrane protein complex	GO:0098797	0.000380889	3.4192	686	173	19	18956	GRIN1,APBB1IP,B2M,TF,CDH20,ALCAM,ABCA2,SGCZ,KCNIP4,CDH12,PDE4B,GRID2,GRIA4,SNTG1,KCND2,DMD,DLG2,KCNQ5,DPP10	Ex_3/3_up		GO:BP	positive regulation of transport	GO:0051050	0.00271089	2.56689	961	31	8	18017	CALM1,AHI1,TMSB4X,CCK,ATP1B1,VSNL1,CLASP2,YWHAH	Ex_3/3_down
GO:CC	dendritic spine	GO:0043197	0.000620249	3.20743	172	173	9	18956	GRIN1,DOCK10,CRYAB,LAMA2,GRM3,PDE4B,GRID2,GRIA4,KCND2	Ex_3/3_up		GO:BP	transport along microtubule	GO:0010970	0.00271089	2.56689	163	31	4	18017	DYNLL1,MAP1B,APP,UCHL1	Ex_3/3_down
GO:CC	neuron spine	GO:0044309	0.000676789	3.16955	175	173	9	18956	GRIN1,DOCK10,CRYAB,LAMA2,GRM3,PDE4B,GRID2,GRIA4,KCND2	Ex_3/3_up		GO:BP	negative regulation of biological process	GO:0048519	0.00282605	2.54882	5719	31	20	18017	CALM1,RTN4,STMN1,PEBP1,FTH1,DYNLL1,AHI1,MAP1B,TMSB4X,CCK,KALRN,VSNL1,CLASP2,APP,PLCB1,STMN2,UCHL1,YWHAH,RGS7,MAPK10	Ex_3/3_down
GO:CC	cell leading edge	GO:0031252	0.000748794	3.12564	427	173	14	18956	APBB1IP,DOCK8,FRMD4B,ADGRV1,SLC1A2,DLC1,SHTN1,CTNNA3,UNC5C,ROBO2,PTPRK,SNTG1,DMD,DST	Ex_3/3_up		GO:BP	synaptic signaling	GO:0099536	0.00295168	2.52993	724	31	7	18017	CALM1,SNAP25,MAP1B,APP,PLCB1,NRXN3,YWHAH	Ex_3/3_down
GO:CC	dendritic tree	GO:0097447	0.0011585	2.9361	629	173	17	18956	GRIN1,APOE,RELN,DOCK10,ALCAM,CRYAB,LAMA2,GRM3,UNC5C,CLU,PRNP,PTPRK,PDE4B,GRID2,GRIA4,KCND2,KIRREL3	Ex_3/3_up		GO:BP	regulation of cell morphogenesis	GO:0022604	0.00301711	2.52041	506	31	6	18017	RTN4,MAP1B,CHN1,KALRN,NRCAM,YWHAH	Ex_3/3_down
GO:CC	dendrite	GO:0030425	0.0011585	2.9361	627	173	17	18956	GRIN1,APOE,RELN,DOCK10,ALCAM,CRYAB,LAMA2,GRM3,UNC5C,CLU,PRNP,PTPRK,PDE4B,GRID2,GRIA4,KCND2,KIRREL3	Ex_3/3_up		GO:BP	neuron migration	GO:0001764	0.00301711	2.52041	169	31	4	18017	MAP1B,CCK,NRCAM,GPM6A	Ex_3/3_down
GO:CC	neuronal cell body	GO:0043025	0.00203207	2.69206	535	173	15	18956	SLC1A3,APOE,ALCAM,CRYAB,SHTN1,MBP,PDE1C,ASTN2,UNC5C,PDE1A,PTPRK,GRIA4,KCND2,DMD,DLG2	Ex_3/3_up		GO:BP	regulation of multicellular organismal development	GO:2000026	0.00324694	2.48853	2262	31	12	18017	RTN4,SNAP25,AHI1,MAP1B,CHN1,KALRN,CLASP2,APP,PLCB1,STMN2,NRCAM,YWHAH	Ex_3/3_down
GO:CC	cell body	GO:0044297	0.00244408	2.61188	609	173	16	18956	SLC1A3,APOE,ALCAM,SLC1A2,CRYAB,SHTN1,MBP,PDE1C,ASTN2,UNC5C,PDE1A,PTPRK,GRIA4,KCND2,DMD,DLG2	Ex_3/3_up		GO:BP	organelle localization by membrane tethering	GO:0140056	0.00329615	2.48199	174	31	4	18017	HSP90AA1,SNAP25,DYNLL1,AHI1	Ex_3/3_down
GO:CC	actin-based cell projection	GO:0098858	0.00293217	2.53281	220	173	9	18956	CNP,PCDH15,ADGRV1,SHTN1,FCHSD2,UNC5C,ZSWIM6,WWOX,DMD	Ex_3/3_up		GO:BP	neuron projection extension	GO:1990138	0.00329615	2.48199	174	31	4	18017	RTN4,HSP90AA1,MAP1B,NRCAM	Ex_3/3_down
GO:CC	intrinsic component of membrane	GO:0031224	0.00293217	2.53281	5852	173	76	18956	SLC26A3,LINGO1,PLP1,GRIN1,SLC1A3,KCNH8,SLC5A11,B2M,LHFPL3,TMEM144,CLMN,CDH20,CHST11,PCDH15,CLDN11,ALCAM,ABCA2,SLC9A9,ERBB4,ADGRV1,GRIK1,SLC1A2,ST6GAL1,GPC5,TMEM165,SGCZ,TMTC2,ANO4,SLCO3A1,PLXDC2,MAN2A1,ITPR2,FUT8,NCAM2,TMEFF2,GRM3,HS3ST4,ASTN2,UNC5C,ROBO1,NRG1,LRP1B,CNTN5,SLC44A1,PRNP,CSMD1,KCNIP4,ROBO2,CADM1,PTPRK,CDH12,PDE4B,FAIM2,PRUNE2,GRID2,NEGR1,GRIA4,ADGRL3,LRRTM4,GALNTL6,NDRG4,KCND2,CADM2…	Ex_3/3_up		GO:BP	negative regulation of microtubule polymerization	GO:0031115	0.00332447	2.47828	13	31	2	18017	STMN1,STMN2	Ex_3/3_down
GO:CC	integral component of membrane	GO:0016021	0.003549	2.44989	5699	173	74	18956	SLC26A3,LINGO1,PLP1,GRIN1,SLC1A3,KCNH8,SLC5A11,B2M,LHFPL3,TMEM144,CLMN,CDH20,CHST11,PCDH15,CLDN11,ALCAM,ABCA2,SLC9A9,ERBB4,ADGRV1,GRIK1,SLC1A2,ST6GAL1,GPC5,TMEM165,SGCZ,TMTC2,ANO4,SLCO3A1,PLXDC2,MAN2A1,ITPR2,FUT8,NCAM2,TMEFF2,GRM3,HS3ST4,ASTN2,UNC5C,ROBO1,NRG1,LRP1B,SLC44A1,PRNP,CSMD1,KCNIP4,ROBO2,CADM1,PTPRK,CDH12,PDE4B,FAIM2,PRUNE2,GRID2,GRIA4,ADGRL3,LRRTM4,GALNTL6,NDRG4,KCND2,CADM2,PTPRD,DLG2,…	Ex_3/3_up		GO:BP	positive regulation of cellular process	GO:0048522	0.00332447	2.47828	5803	31	20	18017	CALM1,RTN4,HSP90AA1,STMN1,SNAP25,AHI1,MAP1B,TMSB4X,CCK,ATP1B1,KALRN,VSNL1,CLASP2,APP,PLCB1,STMN2,NRCAM,YWHAH,MAPK10,GPM6A	Ex_3/3_down
GO:CC	anchoring junction	GO:0070161	0.003549	2.44989	840	173	19	18956	APBB1IP,ARHGAP24,FRMD4B,B2M,CDH20,CLDN11,ALCAM,DLC1,CTNNA3,GAB1,MAP4K4,CADM1,PTPRK,CDH12,ADGRL3,TJP1,DMD,KAZN,DST	Ex_3/3_up		GO:BP	transport	GO:0006810	0.00334655	2.4754	5299	31	19	18017	CALM1,HSP90AA1,SNAP25,FTH1,TUBA1B,DYNLL1,AHI1,MAP1B,TMSB4X,CCK,ATP1B1,KALRN,VSNL1,CLASP2,APP,NRXN3,UCHL1,YWHAH,GPM6A	Ex_3/3_down
GO:CC	synaptic cleft	GO:0043083	0.0052306	2.28145	16	173	3	18956	GRIN1,APOE,LAMA2	Ex_3/3_up		GO:BP	negative regulation of cellular component organization	GO:0051129	0.00342255	2.46565	750	31	7	18017	RTN4,STMN1,MAP1B,TMSB4X,CLASP2,STMN2,YWHAH	Ex_3/3_down
GO:CC	main axon	GO:0044304	0.0053701	2.27002	69	173	5	18956	SLC1A2,MBP,ROBO2,SPOCK1,DLG2	Ex_3/3_up		GO:BP	regulation of secretion	GO:0051046	0.00356746	2.44764	756	31	7	18017	CALM1,SNAP25,CCK,KALRN,VSNL1,CLASP2,NRXN3	Ex_3/3_down
GO:CC	basal part of cell	GO:0045178	0.0053701	2.27002	69	173	5	18956	SLC1A3,TF,CLDN11,ERBB4,DST	Ex_3/3_up		GO:BP	establishment of protein localization to membrane	GO:0090150	0.00368227	2.43388	337	31	5	18017	CALM1,HSP90AA1,SNAP25,ATP1B1,YWHAH	Ex_3/3_down
GO:CC	syntrophin complex	GO:0016013	0.00610771	2.21412	4	173	2	18956	SNTG1,DMD	Ex_3/3_up		GO:BP	negative regulation of protein depolymerization	GO:1901880	0.00368227	2.43388	72	31	3	18017	MAP1B,CLASP2,STMN2	Ex_3/3_down
GO:CC	neuromuscular junction	GO:0031594	0.00699636	2.15513	74	173	5	18956	FCHSD2,LAMA2,NRG1,SPOCK1,DLG2	Ex_3/3_up		GO:BP	membrane docking	GO:0022406	0.00376645	2.42407	183	31	4	18017	HSP90AA1,SNAP25,DYNLL1,AHI1	Ex_3/3_down
GO:CC	membrane	GO:0016020	0.00704281	2.15225	9802	173	111	18956	SLC26A3,LINGO1,PLP1,GRIN1,SLC1A3,APOE,APBB1IP,C10ORF90,KCNH8,SLC5A11,RELN,DOCK8,PTGDS,DOCK5,CNP,DOCK10,HIP1,B2M,LHFPL3,TMEM144,CLMN,TF,CDH20,CHST11,PCDH15,CLDN11,ALCAM,ABCA2,SLC9A9,ERBB4,ADGRV1,FKBP5,GRIK1,SLC1A2,ST6GAL1,DLC1,CRYAB,GPC5,PIP4K2A,SGK1,TMEM165,SGCZ,FCHSD2,TMTC2,PHLPP1,ANO4,MBP,SLCO3A1,CAMK2B,LAMA2,PLXDC2,DIP2B,MAN2A1,ITPR2,FUT8,NCAM2,TMEFF2,GRM3,HS3ST4,ASTN2,UNC5C,ROBO1,NRG1,CLU,LRP…	Ex_3/3_up		GO:BP	regulation of response to stimulus	GO:0048583	0.00382176	2.41774	4399	31	17	18017	CALM1,RTN4,HSP90AA1,STMN1,PEBP1,CHN1,TMSB4X,CCK,KALRN,VSNL1,CLASP2,APP,PLCB1,UCHL1,YWHAH,RGS7,MAPK10	Ex_3/3_down
GO:CC	dystrophin-associated glycoprotein complex	GO:0016010	0.00719598	2.14291	19	173	3	18956	SGCZ,SNTG1,DMD	Ex_3/3_up		GO:BP	biological regulation	GO:0065007	0.00382699	2.41714	12697	31	30	18017	CALM1,SPARCL1,RTN4,HSP90AA1,STMN1,PEBP1,SNAP25,FTH1,DYNLL1,AHI1,MAP1B,CHN1,TMSB4X,CCK,ATP1B1,KALRN,VSNL1,CLASP2,APP,CKB,PLCB1,NRXN3,STMN2,NRCAM,UCHL1,GPHN,YWHAH,RGS7,MAPK10,GPM6A	Ex_3/3_down
GO:CC	intrinsic component of plasma membrane	GO:0031226	0.00719598	2.14291	1692	173	29	18956	SLC26A3,GRIN1,SLC1A3,KCNH8,PCDH15,ALCAM,ERBB4,GRIK1,SLC1A2,GPC5,SLCO3A1,GRM3,ROBO1,NRG1,PRNP,KCNIP4,PTPRK,GRID2,GRIA4,ADGRL3,KCND2,PTPRD,DLG2,NRG3,SLC24A2,GRM5,KCNQ5,DCC,DPP10	Ex_3/3_up		GO:BP	cellular protein localization	GO:0034613	0.00413559	2.38346	1985	31	11	18017	CALM1,RTN4,HSP90AA1,SNAP25,DYNLL1,AHI1,TMSB4X,ATP1B1,CLASP2,GPHN,YWHAH	Ex_3/3_down
GO:CC	receptor complex	GO:0043235	0.00719598	2.14291	500	173	13	18956	GRIN1,APBB1IP,B2M,TF,ALCAM,ERBB4,ADGRV1,ITPR2,LRP1B,KCTD16,GRID2,GRIA4,DLG2	Ex_3/3_up		GO:BP	regulation of axonogenesis	GO:0050770	0.00413988	2.38301	189	31	4	18017	RTN4,MAP1B,CHN1,NRCAM	Ex_3/3_down
GO:CC	glycoprotein complex	GO:0090665	0.00719598	2.14291	19	173	3	18956	SGCZ,SNTG1,DMD	Ex_3/3_up		GO:BP	cell migration	GO:0016477	0.00414461	2.38252	1651	31	10	18017	RTN4,MAP1B,TMSB4X,CCK,ATP1B1,CLASP2,APP,PLCB1,NRCAM,GPM6A	Ex_3/3_down
GO:CC	postsynaptic density membrane	GO:0098839	0.00719598	2.14291	77	173	5	18956	GRIN1,ERBB4,DLG2,GRM5,DCC	Ex_3/3_up		GO:BP	cellular macromolecule localization	GO:0070727	0.00425221	2.37138	1996	31	11	18017	CALM1,RTN4,HSP90AA1,SNAP25,DYNLL1,AHI1,TMSB4X,ATP1B1,CLASP2,GPHN,YWHAH	Ex_3/3_down
GO:CC	transmembrane transporter complex	GO:1902495	0.00776425	2.1099	322	173	10	18956	GRIN1,ABCA2,KCNIP4,PDE4B,GRID2,GRIA4,KCND2,DLG2,KCNQ5,DPP10	Ex_3/3_up		GO:BP	establishment of localization	GO:0051234	0.00430012	2.36652	5427	31	19	18017	CALM1,HSP90AA1,SNAP25,FTH1,TUBA1B,DYNLL1,AHI1,MAP1B,TMSB4X,CCK,ATP1B1,KALRN,VSNL1,CLASP2,APP,NRXN3,UCHL1,YWHAH,GPM6A	Ex_3/3_down
GO:CC	astrocyte projection	GO:0097449	0.0086605	2.06246	21	173	3	18956	SLC1A2,GRM3,DMD	Ex_3/3_up		GO:BP	regulation of microtubule cytoskeleton organization	GO:0070507	0.00430012	2.36652	192	31	4	18017	STMN1,MAP1B,CLASP2,STMN2	Ex_3/3_down
GO:CC	transporter complex	GO:1990351	0.00893271	2.04902	330	173	10	18956	GRIN1,ABCA2,KCNIP4,PDE4B,GRID2,GRIA4,KCND2,DLG2,KCNQ5,DPP10	Ex_3/3_up		GO:BP	mitotic cell cycle	GO:0000278	0.00431234	2.36529	1056	31	8	18017	CALM1,HSP90AA1,STMN1,TUBA1B,DYNLL1,CLASP2,APP,PLCB1	Ex_3/3_down
GO:CC	ionotropic glutamate receptor complex	GO:0008328	0.00896116	2.04764	48	173	4	18956	GRIN1,GRID2,GRIA4,DLG2	Ex_3/3_up		GO:BP	microtubule-based transport	GO:0099111	0.00438788	2.35775	194	31	4	18017	DYNLL1,MAP1B,APP,UCHL1	Ex_3/3_down
GO:CC	cation channel complex	GO:0034703	0.00980363	2.00861	225	173	8	18956	GRIN1,KCNIP4,PDE4B,GRIA4,KCND2,DLG2,KCNQ5,DPP10	Ex_3/3_up		GO:BP	regulation of cation transmembrane transport	GO:1904062	0.00440728	2.35583	357	31	5	18017	CALM1,TMSB4X,ATP1B1,APP,YWHAH	Ex_3/3_down
GO:CC	adherens junction	GO:0005912	0.00980363	2.00861	173	173	7	18956	ARHGAP24,FRMD4B,CDH20,CTNNA3,PTPRK,CDH12,TJP1	Ex_3/3_up		GO:BP	regulation of developmental growth	GO:0048638	0.00447211	2.34949	359	31	5	18017	RTN4,MAP1B,APP,PLCB1,NRCAM	Ex_3/3_down
GO:CC	neurotransmitter receptor complex	GO:0098878	0.00980363	2.00861	50	173	4	18956	GRIN1,GRID2,GRIA4,DLG2	Ex_3/3_up		GO:BP	regulation of synaptic plasticity	GO:0048167	0.00447211	2.34949	196	31	4	18017	SNAP25,MAP1B,APP,YWHAH	Ex_3/3_down
KEGG	Glutamatergic synapse	KEGG:04724	0.00228918	2.64032	114	78	8	7963	GRIN1,SLC1A3,GRIK1,SLC1A2,ITPR2,GRM3,GRIA4,GRM5	Ex_3/3_up		GO:BP	negative regulation of protein polymerization	GO:0032272	0.00453297	2.34362	80	31	3	18017	STMN1,TMSB4X,STMN2	Ex_3/3_down
REAC	Unblocking of NMDA receptors, glutamate binding and activation	REAC:R-HSA-438066	0.00922321	2.03512	20	107	4	10627	GRIN1,CAMK2B,GRIA4,DLG2	Ex_3/3_up		GO:BP	adult locomotory behavior	GO:0008344	0.00467131	2.33056	81	31	3	18017	KALRN,APP,UCHL1	Ex_3/3_down
REAC	Neuronal System	REAC:R-HSA-112316	0.00922321	2.03512	399	107	14	10627	GRIN1,SLC1A3,KCNH8,GRIK1,SLC1A2,CAMK2B,NRG1,GRIA4,LRRTM4,KCND2,PTPRD,DLG2,GRM5,KCNQ5	Ex_3/3_up		GO:BP	negative regulation of protein-containing complex disassembly	GO:0043242	0.00481182	2.31769	82	31	3	18017	MAP1B,CLASP2,STMN2	Ex_3/3_down
REAC	Long-term potentiation	REAC:R-HSA-9620244	0.00922321	2.03512	21	107	4	10627	GRIN1,CAMK2B,NRG1,DLG2	Ex_3/3_up		GO:BP	associative learning	GO:0008306	0.00513202	2.28971	84	31	3	18017	SNAP25,CCK,APP	Ex_3/3_down
WP	MECP2 and Associated Rett Syndrome	WP:WP3584	0.00252906	2.59704	72	84	7	7474	GRIN1,CNP,FKBP5,SGK1,MBP,FUT8,GRIA4	Ex_3/3_up		GO:BP	enzyme linked receptor protein signaling pathway	GO:0007167	0.00541835	2.26613	1102	31	8	18017	RTN4,HSP90AA1,STMN1,AHI1,CHN1,KALRN,APP,PLCB1	Ex_3/3_down
WP	Glial Cell Differentiation	WP:WP2276	0.00648102	2.18836	8	84	3	7474	PLP1,CNP,MBP	Ex_3/3_up		GO:BP	cellular protein-containing complex assembly	GO:0034622	0.00541835	2.26613	1104	31	8	18017	RTN4,HSP90AA1,STMN1,SNAP25,MAP1B,TMSB4X,CLASP2,STMN2	Ex_3/3_down
HPA	hippocampus; glial cells[‚â•Medium]	HPA:0250122	0.000155353	3.80868	1944	106	41	10719	LINGO1,SLC1A3,APOE,APBB1IP,KCNH8,PTGDS,CNP,DOCK10,HIP1,QKI,NFIA,CLDN11,FKBP5,SLC1A2,CRYAB,GPC5,ZBTB20,PIP4K2A,POLR2F,SGK1,TMEM165,SHTN1,PDE8A,EDIL3,MBP,DIP2B,QDPR,FUT8,TCF12,PDE1A,KLHL32,GAB1,FHIT,PTMA,DTNA,NPAS3,APLP1,LDLRAD4,TRIM2,KHDRBS2,KIRREL3	Ex_3/3_up		GO:BP	locomotory behavior	GO:0007626	0.00541835	2.26613	209	31	4	18017	SNAP25,KALRN,APP,UCHL1	Ex_3/3_down
GO:MF	cytoskeletal protein binding	GO:0008092	0.00199265	2.70057	983	172	25	18602	ENC1,C10ORF90,APOE,MOBP,HIP1,CLMN,TMSB10,PDE4B,CRYAB,CLU,DLG1,CTNNA3,MAP4K4,YWHAH,SHTN1,PTK2,CAMK2B,ACTB,PRNP,UNC5C,CACNB2,SSH2,FMNL2,TTLL7,BCAS3	In_3/3_up		GO:BP	regulation of signal transduction	GO:0009966	0.00541835	2.26613	3236	31	14	18017	CALM1,RTN4,HSP90AA1,STMN1,PEBP1,CHN1,TMSB4X,KALRN,APP,PLCB1,UCHL1,YWHAH,RGS7,MAPK10	Ex_3/3_down
GO:MF	cyclic-nucleotide phosphodiesterase activity	GO:0004112	0.00199265	2.70057	29	172	5	18602	CNP,PDE1A,PDE4B,PDE1C,PDE8A	In_3/3_up		GO:BP	regulation of exocytosis	GO:0017157	0.00558193	2.25322	211	31	4	18017	CALM1,VSNL1,CLASP2,NRXN3	Ex_3/3_down
GO:MF	calmodulin binding	GO:0005516	0.00391079	2.40774	202	172	10	18602	ARPP21,GRIN1,NRGN,PDE1A,MBP,PDE1C,CAMK2B,TJP1,KCNQ5,PPP3CA	In_3/3_up		GO:BP	cellular response to stimulus	GO:0051716	0.00560168	2.25168	7777	31	23	18017	CALM1,SPARCL1,RTN4,HSP90AA1,STMN1,PEBP1,TUBA1B,AHI1,MAP1B,CHN1,TMSB4X,CCK,ATP1B1,KALRN,VSNL1,APP,PLCB1,NRXN3,STMN2,UCHL1,YWHAH,RGS7,MAPK10	Ex_3/3_down
GO:MF	phosphoric diester hydrolase activity	GO:0008081	0.00391079	2.40774	93	172	7	18602	CNP,PDE1A,PDE4B,PDE1C,CHRM3,PLCL1,PDE8A	In_3/3_up		GO:BP	microtubule cytoskeleton organization	GO:0000226	0.00560168	2.25168	594	31	6	18017	CALM1,STMN1,TUBA1B,MAP1B,CLASP2,STMN2	Ex_3/3_down
GO:MF	glutamate receptor activity	GO:0008066	0.0066091	2.17986	27	172	4	18602	GRIN1,GRM3,GRID2,GRM7	In_3/3_up		GO:BP	protein localization	GO:0008104	0.00574486	2.24072	2856	31	13	18017	CALM1,RTN4,HSP90AA1,SNAP25,DYNLL1,AHI1,TMSB4X,ATP1B1,VSNL1,CLASP2,NRCAM,GPHN,YWHAH	Ex_3/3_down
GO:MF	adenylate cyclase regulator activity	GO:0010854	0.0066091	2.17986	2	172	2	18602	ADGRV1,GRM7	In_3/3_up		GO:BP	cellular chemical homeostasis	GO:0055082	0.00574486	2.24072	845	31	7	18017	CALM1,RTN4,FTH1,ATP1B1,VSNL1,APP,CKB	Ex_3/3_down
GO:MF	adenylate cyclase inhibitor activity	GO:0010855	0.0066091	2.17986	2	172	2	18602	ADGRV1,GRM7	In_3/3_up		GO:BP	regulation of protein depolymerization	GO:1901879	0.00574486	2.24072	89	31	3	18017	MAP1B,CLASP2,STMN2	Ex_3/3_down
GO:MF	3',5'-cyclic-nucleotide phosphodiesterase activity	GO:0004114	0.0066091	2.17986	27	172	4	18602	PDE1A,PDE4B,PDE1C,PDE8A	In_3/3_up		GO:BP	mitotic cell cycle phase transition	GO:0044772	0.00607914	2.21616	606	31	6	18017	CALM1,HSP90AA1,DYNLL1,CLASP2,APP,PLCB1	Ex_3/3_down
GO:MF	structural constituent of myelin sheath	GO:0019911	0.0066091	2.17986	10	172	3	18602	PLP1,MOBP,MBP	In_3/3_up		GO:BP	cellular protein complex disassembly	GO:0043624	0.00670073	2.17388	224	31	4	18017	STMN1,MAP1B,CLASP2,STMN2	Ex_3/3_down
GO:MF	phosphoric ester hydrolase activity	GO:0042578	0.0066091	2.17986	382	172	13	18602	CNP,PTPRK,PDE1A,PDE4B,PDE1C,PHLPP1,DLG1,CHRM3,PLCL1,DNAJC6,PDE8A,SSH2,PPP3CA	In_3/3_up		GO:BP	ciliary basal body-plasma membrane docking	GO:0097711	0.00679413	2.16787	95	31	3	18017	HSP90AA1,DYNLL1,AHI1	Ex_3/3_down
GO:BP	nervous system development	GO:0007399	8.17015e-15	14.0878	2483	172	70	18017	DHFR,LINGO1,SPP1,ENC1,LAMA2,PLP1,SLC1A3,CBLN2,CNP,APOE,GRIN1,GAB1,MOBP,ADGRV1,ABCA2,NRGN,SLC1A2,PTPRK,MAN2A1,CLMN,NFIA,CLDN11,NEFL,NRG1,LINGO2,RELN,MBP,TNR,CLU,SH3GL3,ALCAM,ZSWIM6,DLG1,B2M,MEF2A,APLP1,GRID2,MAP4K4,DLC1,CHRM3,DOCK10,FRYL,DSCAM,YWHAH,DCC,SHTN1,PTK2,CAMK2B,ACTB,MBNL1,GPM6B,FAIM2,UNC5C,ERBB4,NCAM2,PSAP,ASIC2,PCDH15,THY1,ARHGAP26,HDAC9,TTLL7,PPP3CA,QKI,NTM,SGK1,ROBO1,DYNLL1,CSMD3,NDRG4	In_3/3_up		GO:BP	negative regulation of neuron differentiation	GO:0045665	0.0071522	2.14556	229	31	4	18017	RTN4,APP,STMN2,YWHAH	Ex_3/3_down
GO:BP	neuron differentiation	GO:0030182	2.36453e-12	11.6263	1437	172	49	18017	DHFR,LINGO1,SPP1,ENC1,LAMA2,PLP1,SLC1A3,CNP,APOE,GRIN1,GAB1,ADGRV1,PTPRK,CLMN,NEFL,NRG1,RELN,TNR,SH3GL3,ALCAM,ZSWIM6,B2M,MEF2A,GRID2,MAP4K4,DOCK10,FRYL,DSCAM,YWHAH,DCC,SHTN1,PTK2,CAMK2B,ACTB,GPM6B,FAIM2,UNC5C,ERBB4,NCAM2,PSAP,PCDH15,THY1,HDAC9,PPP3CA,NTM,SGK1,ROBO1,CSMD3,NDRG4	In_3/3_up		GO:BP	regulation of axon extension	GO:0030516	0.0071522	2.14556	97	31	3	18017	RTN4,MAP1B,NRCAM	Ex_3/3_down
GO:BP	neuron projection development	GO:0031175	3.43522e-12	11.464	1030	172	41	18017	DHFR,LINGO1,SPP1,ENC1,LAMA2,PLP1,CNP,APOE,GRIN1,GAB1,ADGRV1,PTPRK,CLMN,NEFL,RELN,TNR,ALCAM,ZSWIM6,B2M,MEF2A,GRID2,MAP4K4,DOCK10,FRYL,DSCAM,YWHAH,DCC,SHTN1,PTK2,CAMK2B,ACTB,GPM6B,UNC5C,NCAM2,PCDH15,THY1,PPP3CA,SGK1,ROBO1,CSMD3,NDRG4	In_3/3_up		GO:BP	localization of cell	GO:0051674	0.00766003	2.11577	1823	31	10	18017	RTN4,MAP1B,TMSB4X,CCK,ATP1B1,CLASP2,APP,PLCB1,NRCAM,GPM6A	Ex_3/3_down
GO:BP	neuron development	GO:0048666	7.10991e-12	11.1481	1167	172	43	18017	DHFR,LINGO1,SPP1,ENC1,LAMA2,PLP1,SLC1A3,CNP,APOE,GRIN1,GAB1,ADGRV1,PTPRK,CLMN,NEFL,RELN,TNR,ALCAM,ZSWIM6,B2M,MEF2A,GRID2,MAP4K4,DOCK10,FRYL,DSCAM,YWHAH,DCC,SHTN1,PTK2,CAMK2B,ACTB,GPM6B,UNC5C,NCAM2,PCDH15,THY1,PPP3CA,NTM,SGK1,ROBO1,CSMD3,NDRG4	In_3/3_up		GO:BP	cell motility	GO:0048870	0.00766003	2.11577	1823	31	10	18017	RTN4,MAP1B,TMSB4X,CCK,ATP1B1,CLASP2,APP,PLCB1,NRCAM,GPM6A	Ex_3/3_down
GO:BP	neurogenesis	GO:0022008	1.06603e-11	10.9722	1710	172	52	18017	DHFR,LINGO1,SPP1,ENC1,LAMA2,PLP1,SLC1A3,CNP,APOE,GRIN1,GAB1,ADGRV1,ABCA2,PTPRK,MAN2A1,CLMN,NEFL,NRG1,RELN,TNR,CLU,SH3GL3,ALCAM,ZSWIM6,B2M,MEF2A,GRID2,MAP4K4,DOCK10,FRYL,DSCAM,YWHAH,DCC,SHTN1,PTK2,CAMK2B,ACTB,GPM6B,FAIM2,UNC5C,ERBB4,NCAM2,PSAP,PCDH15,THY1,HDAC9,PPP3CA,NTM,SGK1,ROBO1,CSMD3,NDRG4	In_3/3_up		GO:BP	cation transmembrane transport	GO:0098655	0.00767987	2.11465	894	31	7	18017	CALM1,SNAP25,TMSB4X,ATP1B1,APP,YWHAH,GPM6A	Ex_3/3_down
GO:BP	generation of neurons	GO:0048699	1.3301e-11	10.8761	1605	172	50	18017	DHFR,LINGO1,SPP1,ENC1,LAMA2,PLP1,SLC1A3,CNP,APOE,GRIN1,GAB1,ADGRV1,PTPRK,MAN2A1,CLMN,NEFL,NRG1,RELN,TNR,SH3GL3,ALCAM,ZSWIM6,B2M,MEF2A,GRID2,MAP4K4,DOCK10,FRYL,DSCAM,YWHAH,DCC,SHTN1,PTK2,CAMK2B,ACTB,GPM6B,FAIM2,UNC5C,ERBB4,NCAM2,PSAP,PCDH15,THY1,HDAC9,PPP3CA,NTM,SGK1,ROBO1,CSMD3,NDRG4	In_3/3_up		GO:BP	negative regulation of organelle organization	GO:0010639	0.00783836	2.10577	419	31	5	18017	STMN1,MAP1B,TMSB4X,CLASP2,STMN2	Ex_3/3_down
GO:BP	cell development	GO:0048468	3.77487e-11	10.4231	2237	172	59	18017	SLC26A3,DHFR,LINGO1,SPP1,ENC1,LAMA2,PLP1,SLC1A3,CNP,APOE,GRIN1,GAB1,ADGRV1,ABCA2,DOCK5,PIP4K2A,PTPRK,MAN2A1,CLMN,NEFL,NRG1,RELN,TNR,CLU,SH3GL3,ALCAM,ZSWIM6,CHST11,B2M,MEF2A,GRID2,MAP4K4,DOCK10,FRYL,DSCAM,YWHAH,DCC,SHTN1,PTK2,CAMK2B,ACTB,GPM6B,TJP1,UNC5C,ERBB4,NCAM2,PSAP,PCDH15,THY1,HDAC9,SGCZ,TMEFF2,PPP3CA,QKI,NTM,SGK1,ROBO1,CSMD3,NDRG4	In_3/3_up		GO:BP	neuron projection fasciculation	GO:0106030	0.00801622	2.09603	23	31	2	18017	RTN4,NRCAM	Ex_3/3_down
GO:BP	cell morphogenesis	GO:0000902	8.29763e-11	10.081	1058	172	39	18017	LINGO1,SPP1,LAMA2,SLC1A3,CNP,APOE,GRIN1,GAB1,DOCK5,CDH20,NEFL,NRG1,RELN,TNR,CLU,ALCAM,ZSWIM6,DLG1,MEF2A,MAP4K4,DLC1,DOCK10,FRYL,DSCAM,YWHAH,DCC,SHTN1,PTK2,CAMK2B,ACTB,UNC5C,CDH12,PCDH15,THY1,FMNL2,TMEFF2,PPP3CA,SGK1,ROBO1	In_3/3_up		GO:BP	axonal fasciculation	GO:0007413	0.00801622	2.09603	23	31	2	18017	RTN4,NRCAM	Ex_3/3_down
GO:BP	cell junction organization	GO:0034330	3.46069e-10	9.46084	703	172	31	18017	CBLN2,APOE,GRIN1,PTPRK,CDH20,NFIA,CLDN11,NEFL,NRG1,LINGO2,RELN,TNR,DLG1,GRID2,MAP4K4,DLC1,DOCK10,DSCAM,PTK2,CAMK2B,ACTB,PRNP,GPM6B,TJP1,ERBB4,ASIC2,CDH12,CACNB2,THY1,BCAS3,CADM1	In_3/3_up		GO:BP	cell cycle phase transition	GO:0044770	0.00813415	2.08969	651	31	6	18017	CALM1,HSP90AA1,DYNLL1,CLASP2,APP,PLCB1	Ex_3/3_down
GO:BP	regulation of localization	GO:0032879	1.98277e-09	8.70273	2913	172	65	18017	SPP1,TF,DOCK8,LAMA2,APOE,GRIN1,GAB1,KCNH8,ABCA2,DOCK5,SLC1A2,PTPRK,HIP1,GPC5,NEFL,NRG1,ITPR2,TMSB10,PDE4B,CRYAB,RELN,LDLRAD4,CLU,SH3GL3,CACNA2D1,ZSWIM6,DLG1,B2M,MEF2A,CTNNA3,MAP4K4,DLC1,CHRM3,CACNA2D3,DOCK10,DSCAM,YWHAH,SHTN1,PTK2,CAMK2B,ACTB,DNAJC6,PRNP,GPM6B,GRM7,TJP1,ATP8A1,PRKCB,UNC5C,ERBB4,ASIC2,CACNB2,DOCK4,NKAIN2,THY1,SSH2,HDAC9,KCNQ5,BCAS3,TMEFF2,PPP3CA,SGK1,CADM1,ROBO1,NDRG4	In_3/3_up		GO:BP	multicellular organismal process	GO:0032501	0.00813415	2.08969	7992	31	23	18017	CALM1,RTN4,HSP90AA1,STMN1,SNAP25,DYNLL1,AHI1,MAP1B,CHN1,TMSB4X,CCK,ATP1B1,KALRN,CLASP2,APP,CKB,PLCB1,NRXN3,STMN2,NRCAM,UCHL1,YWHAH,GPM6A	Ex_3/3_down
GO:BP	plasma membrane bounded cell projection organization	GO:0120036	3.5268e-09	8.45262	1567	172	45	18017	DHFR,LINGO1,SPP1,ENC1,ARHGAP24,LAMA2,PLP1,CNP,APOE,GRIN1,GAB1,ADGRV1,PTPRK,CLMN,NEFL,RELN,TNR,ALCAM,ZSWIM6,B2M,MEF2A,GRID2,MAP4K4,DOCK10,FRYL,DSCAM,YWHAH,DCC,SHTN1,PTK2,CAMK2B,ACTB,PRNP,GPM6B,UNC5C,NCAM2,PCDH15,THY1,BCAS3,PPP3CA,SGK1,ROBO1,DYNLL1,CSMD3,NDRG4	In_3/3_up		GO:BP	mitotic cell cycle process	GO:1903047	0.00813415	2.08969	908	31	7	18017	CALM1,HSP90AA1,STMN1,DYNLL1,CLASP2,APP,PLCB1	Ex_3/3_down
GO:BP	cell projection organization	GO:0030030	7.72088e-09	8.11233	1608	172	45	18017	DHFR,LINGO1,SPP1,ENC1,ARHGAP24,LAMA2,PLP1,CNP,APOE,GRIN1,GAB1,ADGRV1,PTPRK,CLMN,NEFL,RELN,TNR,ALCAM,ZSWIM6,B2M,MEF2A,GRID2,MAP4K4,DOCK10,FRYL,DSCAM,YWHAH,DCC,SHTN1,PTK2,CAMK2B,ACTB,PRNP,GPM6B,UNC5C,NCAM2,PCDH15,THY1,BCAS3,PPP3CA,SGK1,ROBO1,DYNLL1,CSMD3,NDRG4	In_3/3_up		GO:BP	feeding behavior	GO:0007631	0.00813415	2.08969	103	31	3	18017	CCK,APP,UCHL1	Ex_3/3_down
GO:BP	cell morphogenesis involved in neuron differentiation	GO:0048667	9.46206e-09	8.02401	615	172	27	18017	LINGO1,SPP1,LAMA2,SLC1A3,CNP,APOE,GRIN1,GAB1,NEFL,RELN,TNR,ALCAM,ZSWIM6,MEF2A,DOCK10,DSCAM,YWHAH,DCC,SHTN1,PTK2,CAMK2B,ACTB,UNC5C,PCDH15,THY1,PPP3CA,ROBO1	In_3/3_up		GO:BP	cation transport	GO:0006812	0.00813415	2.08969	1197	31	8	18017	CALM1,SNAP25,FTH1,TMSB4X,ATP1B1,APP,YWHAH,GPM6A	Ex_3/3_down
GO:BP	chemical synaptic transmission	GO:0007268	2.42059e-08	7.61608	694	172	28	18017	LAMA2,PLP1,SLC1A3,CBLN2,CNP,APOE,GRIN1,GRM3,NRGN,SLC1A2,RELN,MBP,TNR,DLG1,GRID2,CHRM3,YWHAH,DCC,PLCL1,CAMK2B,PRNP,GRM7,PRKCB,FCHSD2,ASIC2,CACNB2,PPP3CA,DGKB	In_3/3_up		GO:BP	regulation of cellular process	GO:0050794	0.0081745	2.08754	11418	31	28	18017	CALM1,SPARCL1,RTN4,HSP90AA1,STMN1,PEBP1,SNAP25,FTH1,DYNLL1,AHI1,MAP1B,CHN1,TMSB4X,CCK,ATP1B1,KALRN,VSNL1,CLASP2,APP,PLCB1,NRXN3,STMN2,NRCAM,UCHL1,YWHAH,RGS7,MAPK10,GPM6A	Ex_3/3_down
GO:BP	anterograde trans-synaptic signaling	GO:0098916	2.42059e-08	7.61608	694	172	28	18017	LAMA2,PLP1,SLC1A3,CBLN2,CNP,APOE,GRIN1,GRM3,NRGN,SLC1A2,RELN,MBP,TNR,DLG1,GRID2,CHRM3,YWHAH,DCC,PLCL1,CAMK2B,PRNP,GRM7,PRKCB,FCHSD2,ASIC2,CACNB2,PPP3CA,DGKB	In_3/3_up		GO:BP	establishment of mitochondrion localization, microtubule-mediated	GO:0034643	0.00835785	2.07791	24	31	2	18017	MAP1B,UCHL1	Ex_3/3_down
GO:BP	trans-synaptic signaling	GO:0099537	2.95319e-08	7.52971	702	172	28	18017	LAMA2,PLP1,SLC1A3,CBLN2,CNP,APOE,GRIN1,GRM3,NRGN,SLC1A2,RELN,MBP,TNR,DLG1,GRID2,CHRM3,YWHAH,DCC,PLCL1,CAMK2B,PRNP,GRM7,PRKCB,FCHSD2,ASIC2,CACNB2,PPP3CA,DGKB	In_3/3_up		GO:BP	mitochondrion transport along microtubule	GO:0047497	0.00835785	2.07791	24	31	2	18017	MAP1B,UCHL1	Ex_3/3_down
GO:BP	regulation of cellular component movement	GO:0051270	3.40813e-08	7.46748	1142	172	36	18017	TF,DOCK8,LAMA2,APOE,GAB1,DOCK5,PTPRK,NRG1,TMSB10,PDE4B,RELN,LDLRAD4,ZSWIM6,DLG1,CTNNA3,MAP4K4,DLC1,DOCK10,DSCAM,SHTN1,PTK2,CAMK2B,TJP1,ATP8A1,UNC5C,ERBB4,DOCK4,THY1,SSH2,HDAC9,BCAS3,TMEFF2,PPP3CA,SGK1,ROBO1,NDRG4	In_3/3_up		GO:BP	synaptic vesicle exocytosis	GO:0016079	0.00849471	2.07085	106	31	3	18017	CALM1,SNAP25,NRXN3	Ex_3/3_down
GO:BP	cell morphogenesis involved in differentiation	GO:0000904	3.7788e-08	7.42265	764	172	29	18017	LINGO1,SPP1,LAMA2,SLC1A3,CNP,APOE,GRIN1,GAB1,DOCK5,NEFL,RELN,TNR,ALCAM,ZSWIM6,MEF2A,DOCK10,DSCAM,YWHAH,DCC,SHTN1,PTK2,CAMK2B,ACTB,UNC5C,PCDH15,THY1,TMEFF2,PPP3CA,ROBO1	In_3/3_up		GO:BP	regulation of microtubule-based process	GO:0032886	0.00867984	2.06149	247	31	4	18017	STMN1,MAP1B,CLASP2,STMN2	Ex_3/3_down
GO:BP	synaptic signaling	GO:0099536	5.0333e-08	7.29815	724	172	28	18017	LAMA2,PLP1,SLC1A3,CBLN2,CNP,APOE,GRIN1,GRM3,NRGN,SLC1A2,RELN,MBP,TNR,DLG1,GRID2,CHRM3,YWHAH,DCC,PLCL1,CAMK2B,PRNP,GRM7,PRKCB,FCHSD2,ASIC2,CACNB2,PPP3CA,DGKB	In_3/3_up		GO:BP	regulation of phosphorus metabolic process	GO:0051174	0.00874403	2.05829	1878	31	10	18017	CALM1,HSP90AA1,PEBP1,DYNLL1,TMSB4X,CCK,APP,PLCB1,UCHL1,MAPK10	Ex_3/3_down
GO:BP	neuron projection morphogenesis	GO:0048812	5.45819e-08	7.26295	678	172	27	18017	LINGO1,SPP1,LAMA2,CNP,APOE,GRIN1,GAB1,NEFL,RELN,TNR,ALCAM,ZSWIM6,MEF2A,MAP4K4,DOCK10,DSCAM,YWHAH,DCC,SHTN1,PTK2,CAMK2B,ACTB,UNC5C,THY1,PPP3CA,SGK1,ROBO1	In_3/3_up		GO:BP	regulation of anatomical structure morphogenesis	GO:0022603	0.00874403	2.05829	1218	31	8	18017	RTN4,AHI1,MAP1B,CHN1,KALRN,CLASP2,NRCAM,YWHAH	Ex_3/3_down
GO:BP	plasma membrane bounded cell projection morphogenesis	GO:0120039	8.15506e-08	7.08857	692	172	27	18017	LINGO1,SPP1,LAMA2,CNP,APOE,GRIN1,GAB1,NEFL,RELN,TNR,ALCAM,ZSWIM6,MEF2A,MAP4K4,DOCK10,DSCAM,YWHAH,DCC,SHTN1,PTK2,CAMK2B,ACTB,UNC5C,THY1,PPP3CA,SGK1,ROBO1	In_3/3_up		GO:BP	regulation of phosphate metabolic process	GO:0019220	0.00874403	2.05829	1877	31	10	18017	CALM1,HSP90AA1,PEBP1,DYNLL1,TMSB4X,CCK,APP,PLCB1,UCHL1,MAPK10	Ex_3/3_down
GO:BP	cell projection morphogenesis	GO:0048858	8.83427e-08	7.05383	696	172	27	18017	LINGO1,SPP1,LAMA2,CNP,APOE,GRIN1,GAB1,NEFL,RELN,TNR,ALCAM,ZSWIM6,MEF2A,MAP4K4,DOCK10,DSCAM,YWHAH,DCC,SHTN1,PTK2,CAMK2B,ACTB,UNC5C,THY1,PPP3CA,SGK1,ROBO1	In_3/3_up		GO:BP	cell communication by electrical coupling involved in cardiac conduction	GO:0086064	0.00874403	2.05829	25	31	2	18017	CALM1,ATP1B1	Ex_3/3_down
GO:BP	anatomical structure morphogenesis	GO:0009653	9.35761e-08	7.02884	2849	172	60	18017	LINGO1,SPP1,ARHGAP24,LAMA2,SLC1A3,CNP,APOE,GRIN1,GAB1,ABCA2,DOCK5,MAN2A1,CDH20,NEFL,NRG1,CRYAB,RELN,MBP,TNR,CLU,ALCAM,ZSWIM6,CHST11,DLG1,MEF2A,APLP1,GRID2,MAP4K4,DLC1,FOXN3,DOCK10,FRYL,DSCAM,YWHAH,DCC,SHTN1,PTK2,CAMK2B,ACTB,MBNL1,TJP1,FAIM2,PRKCB,UNC5C,ERBB4,PSAP,CDH12,PCDH15,SAT1,THY1,HDAC9,FMNL2,BCAS3,PKM,TMEFF2,PPP3CA,QKI,SGK1,ROBO1,NDRG4	In_3/3_up		GO:BP	response to chemical	GO:0042221	0.00874403	2.05829	4808	31	17	18017	CALM1,HSP90AA1,TUBA1B,MAP1B,CHN1,TMSB4X,CCK,VSNL1,APP,PLCB1,NRXN3,STMN2,NRCAM,UCHL1,GPHN,YWHAH,MAPK10	Ex_3/3_down
GO:BP	cell part morphogenesis	GO:0032990	1.50362e-07	6.82286	716	172	27	18017	LINGO1,SPP1,LAMA2,CNP,APOE,GRIN1,GAB1,NEFL,RELN,TNR,ALCAM,ZSWIM6,MEF2A,MAP4K4,DOCK10,DSCAM,YWHAH,DCC,SHTN1,PTK2,CAMK2B,ACTB,UNC5C,THY1,PPP3CA,SGK1,ROBO1	In_3/3_up		GO:BP	positive regulation of ion transmembrane transporter activity	GO:0032414	0.0088776	2.0517	109	31	3	18017	CALM1,TMSB4X,ATP1B1	Ex_3/3_down
GO:BP	regulation of neuron projection development	GO:0010975	1.68817e-07	6.77258	528	172	23	18017	LINGO1,SPP1,ENC1,APOE,GRIN1,NEFL,RELN,TNR,ZSWIM6,B2M,GRID2,MAP4K4,DSCAM,YWHAH,DCC,SHTN1,PTK2,CAMK2B,THY1,PPP3CA,ROBO1,CSMD3,NDRG4	In_3/3_up		GO:BP	dendrite development	GO:0016358	0.00888275	2.05145	251	31	4	18017	MAP1B,KALRN,APP,YWHAH	Ex_3/3_down
GO:BP	system development	GO:0048731	1.68817e-07	6.77258	5096	172	86	18017	DHFR,LINGO1,SPP1,TF,ENC1,ARHGAP24,LAMA2,PLP1,SLC1A3,CBLN2,CNP,APOE,GRIN1,GAB1,MOBP,ADGRV1,ABCA2,PIP4K2A,NRGN,SLC1A2,PTPRK,MAN2A1,CLMN,NFIA,CLDN11,NEFL,NRG1,LINGO2,CRYAB,RELN,LDLRAD4,MBP,TNR,PHLPP1,CLU,SH3GL3,ALCAM,ZSWIM6,CHST11,DLG1,B2M,MEF2A,QDPR,APLP1,GRID2,MAP4K4,DLC1,CHRM3,FOXN3,DOCK10,FRYL,DSCAM,YWHAH,DCC,SHTN1,PTK2,CAMK2B,ACTB,MBNL1,GPM6B,TJP1,FAIM2,PRKCB,UNC5C,ERBB4,NCAM2,PSAP,ASIC2,PCDH15…	In_3/3_up		GO:BP	positive regulation of multicellular organismal process	GO:0051240	0.00918937	2.03671	1894	31	10	18017	RTN4,MAP1B,TMSB4X,CCK,KALRN,CLASP2,APP,PLCB1,STMN2,NRCAM	Ex_3/3_down
GO:BP	cell junction assembly	GO:0034329	1.68817e-07	6.77258	435	172	21	18017	CBLN2,GRIN1,PTPRK,CDH20,CLDN11,NRG1,LINGO2,DLG1,GRID2,MAP4K4,DLC1,DSCAM,PTK2,ACTB,GPM6B,TJP1,ERBB4,ASIC2,CDH12,THY1,BCAS3	In_3/3_up		GO:BP	regulation of extent of cell growth	GO:0061387	0.00945763	2.02422	112	31	3	18017	RTN4,MAP1B,NRCAM	Ex_3/3_down
GO:BP	regulation of cell morphogenesis involved in differentiation	GO:0010769	1.68817e-07	6.77258	313	172	18	18017	LINGO1,SPP1,APOE,GRIN1,DOCK5,NEFL,RELN,TNR,ZSWIM6,DSCAM,YWHAH,DCC,SHTN1,PTK2,CAMK2B,THY1,PPP3CA,ROBO1	In_3/3_up		GO:BP	regulation of membrane potential	GO:0042391	0.00950397	2.0221	449	31	5	18017	CCK,ATP1B1,APP,NRCAM,YWHAH	Ex_3/3_down
GO:BP	axon development	GO:0061564	1.95301e-07	6.7093	533	172	23	18017	DHFR,LINGO1,SPP1,LAMA2,PLP1,CNP,APOE,GRIN1,GAB1,NEFL,RELN,TNR,ALCAM,ZSWIM6,DSCAM,DCC,SHTN1,PTK2,ACTB,UNC5C,NCAM2,THY1,ROBO1	In_3/3_up		GO:BP	developmental growth	GO:0048589	0.0098421	2.00691	687	31	6	18017	RTN4,HSP90AA1,MAP1B,APP,PLCB1,NRCAM	Ex_3/3_down
GO:BP	regulation of nervous system development	GO:0051960	3.76811e-07	6.42388	978	172	31	18017	LINGO1,SPP1,ENC1,CBLN2,APOE,GRIN1,MAN2A1,NEFL,NRG1,LINGO2,RELN,TNR,SH3GL3,ZSWIM6,DLG1,B2M,GRID2,MAP4K4,DSCAM,YWHAH,DCC,SHTN1,PTK2,CAMK2B,ERBB4,ASIC2,THY1,PPP3CA,ROBO1,CSMD3,NDRG4	In_3/3_up		GO:BP	establishment of mitochondrion localization	GO:0051654	0.0098421	2.00691	27	31	2	18017	MAP1B,UCHL1	Ex_3/3_down
GO:BP	synapse organization	GO:0050808	3.76811e-07	6.42388	417	172	20	18017	CBLN2,APOE,GRIN1,NFIA,NEFL,NRG1,LINGO2,RELN,TNR,DLG1,GRID2,DOCK10,DSCAM,PTK2,CAMK2B,ACTB,PRNP,ERBB4,ASIC2,CACNB2	In_3/3_up		GO:BP	positive regulation of biological process	GO:0048518	0.0098421	2.00691	6416	31	20	18017	CALM1,RTN4,HSP90AA1,STMN1,SNAP25,AHI1,MAP1B,TMSB4X,CCK,ATP1B1,KALRN,VSNL1,CLASP2,APP,PLCB1,STMN2,NRCAM,YWHAH,MAPK10,GPM6A	Ex_3/3_down
GO:BP	cellular component morphogenesis	GO:0032989	3.76811e-07	6.42388	812	172	28	18017	LINGO1,SPP1,LAMA2,CNP,APOE,GRIN1,GAB1,ABCA2,NEFL,RELN,TNR,ALCAM,ZSWIM6,MEF2A,MAP4K4,DOCK10,DSCAM,YWHAH,DCC,SHTN1,PTK2,CAMK2B,ACTB,UNC5C,THY1,PPP3CA,SGK1,ROBO1	In_3/3_up		GO:CC	cell projection	GO:0042995	1.12151e-07	6.95019	2353	32	19	18956	CALM1,RTN4,HSP90AA1,STMN1,SNAP25,DYNLL1,AHI1,MAP1B,CCK,ATP1B1,CLASP2,APP,CKB,STMN2,NRCAM,UCHL1,GPHN,MAPK10,GPM6A	Ex_3/3_down
GO:BP	regulation of locomotion	GO:0040012	3.76811e-07	6.42388	1094	172	33	18017	TF,DOCK8,LAMA2,APOE,GAB1,DOCK5,PTPRK,NRG1,TMSB10,RELN,LDLRAD4,ZSWIM6,MAP4K4,DLC1,DOCK10,DSCAM,SHTN1,PTK2,CAMK2B,TJP1,ATP8A1,UNC5C,ERBB4,DOCK4,THY1,SSH2,HDAC9,BCAS3,TMEFF2,PPP3CA,SGK1,ROBO1,NDRG4	In_3/3_up		GO:CC	plasma membrane bounded cell projection	GO:0120025	2.76404e-07	6.55846	2256	32	18	18956	CALM1,HSP90AA1,STMN1,SNAP25,DYNLL1,AHI1,MAP1B,CCK,ATP1B1,CLASP2,APP,CKB,STMN2,NRCAM,UCHL1,GPHN,MAPK10,GPM6A	Ex_3/3_down
GO:BP	regulation of plasma membrane bounded cell projection organization	GO:0120035	3.79877e-07	6.42036	707	172	26	18017	LINGO1,SPP1,ENC1,ARHGAP24,APOE,GRIN1,NEFL,RELN,TNR,ZSWIM6,B2M,GRID2,MAP4K4,DSCAM,YWHAH,DCC,SHTN1,PTK2,CAMK2B,PRNP,THY1,BCAS3,PPP3CA,ROBO1,CSMD3,NDRG4	In_3/3_up		GO:CC	somatodendritic compartment	GO:0036477	7.72159e-07	6.11229	873	32	12	18956	RTN4,HSP90AA1,SNAP25,MAP1B,CCK,APP,CKB,STMN2,UCHL1,GPHN,MAPK10,GPM6A	Ex_3/3_down
GO:BP	cell adhesion	GO:0007155	3.98422e-07	6.39966	1475	172	39	18017	SPP1,DOCK8,LAMA2,APBB1IP,ADGRV1,DOCK5,PTPRK,CDH20,CLDN11,RELN,MBP,TNR,ALCAM,DLG1,PDZD2,APLP1,GRID2,EDIL3,CTNNA3,MAP4K4,DLC1,DSCAM,PTK2,ACTB,PRNP,GPM6B,PCDH7,TJP1,NCAM2,CDH12,PCDH15,THY1,PCDH9,BCAS3,TMEFF2,PPP3CA,NTM,CADM1,ROBO1	In_3/3_up		GO:CC	neuronal cell body	GO:0043025	7.75277e-07	6.11054	535	32	10	18956	RTN4,HSP90AA1,MAP1B,CCK,APP,CKB,STMN2,UCHL1,MAPK10,GPM6A	Ex_3/3_down
GO:BP	regulation of cell migration	GO:0030334	4.40659e-07	6.3559	991	172	31	18017	DOCK8,LAMA2,APOE,GAB1,DOCK5,PTPRK,NRG1,TMSB10,RELN,LDLRAD4,ZSWIM6,MAP4K4,DLC1,DOCK10,SHTN1,PTK2,CAMK2B,TJP1,ATP8A1,UNC5C,ERBB4,DOCK4,THY1,SSH2,HDAC9,BCAS3,TMEFF2,PPP3CA,SGK1,ROBO1,NDRG4	In_3/3_up		GO:CC	neuron projection	GO:0043005	9.84066e-07	6.00698	1396	32	14	18956	CALM1,HSP90AA1,STMN1,SNAP25,MAP1B,CCK,APP,CKB,STMN2,NRCAM,UCHL1,GPHN,MAPK10,GPM6A	Ex_3/3_down
GO:BP	biological adhesion	GO:0022610	4.40659e-07	6.3559	1482	172	39	18017	SPP1,DOCK8,LAMA2,APBB1IP,ADGRV1,DOCK5,PTPRK,CDH20,CLDN11,RELN,MBP,TNR,ALCAM,DLG1,PDZD2,APLP1,GRID2,EDIL3,CTNNA3,MAP4K4,DLC1,DSCAM,PTK2,ACTB,PRNP,GPM6B,PCDH7,TJP1,NCAM2,CDH12,PCDH15,THY1,PCDH9,BCAS3,TMEFF2,PPP3CA,NTM,CADM1,ROBO1	In_3/3_up		GO:CC	growth cone	GO:0030426	1.13481e-06	5.94508	189	32	7	18956	CALM1,HSP90AA1,SNAP25,MAP1B,APP,STMN2,GPM6A	Ex_3/3_down
GO:BP	regulation of cell projection organization	GO:0031344	4.44372e-07	6.35225	717	172	26	18017	LINGO1,SPP1,ENC1,ARHGAP24,APOE,GRIN1,NEFL,RELN,TNR,ZSWIM6,B2M,GRID2,MAP4K4,DSCAM,YWHAH,DCC,SHTN1,PTK2,CAMK2B,PRNP,THY1,BCAS3,PPP3CA,ROBO1,CSMD3,NDRG4	In_3/3_up		GO:CC	cell body	GO:0044297	1.17407e-06	5.93031	609	32	10	18956	RTN4,HSP90AA1,MAP1B,CCK,APP,CKB,STMN2,UCHL1,MAPK10,GPM6A	Ex_3/3_down
GO:BP	regulation of cell motility	GO:2000145	4.44372e-07	6.35225	1052	172	32	18017	TF,DOCK8,LAMA2,APOE,GAB1,DOCK5,PTPRK,NRG1,TMSB10,RELN,LDLRAD4,ZSWIM6,MAP4K4,DLC1,DOCK10,SHTN1,PTK2,CAMK2B,TJP1,ATP8A1,UNC5C,ERBB4,DOCK4,THY1,SSH2,HDAC9,BCAS3,TMEFF2,PPP3CA,SGK1,ROBO1,NDRG4	In_3/3_up		GO:CC	distal axon	GO:0150034	1.17407e-06	5.93031	308	32	8	18956	CALM1,HSP90AA1,SNAP25,MAP1B,CCK,APP,STMN2,GPM6A	Ex_3/3_down
GO:BP	multicellular organism development	GO:0007275	6.62351e-07	6.17891	5638	172	90	18017	DHFR,LINGO1,SPP1,TF,ENC1,ARHGAP24,LAMA2,PLP1,TSHZ2,SLC1A3,CBLN2,CNP,APOE,GRIN1,GAB1,MOBP,ADGRV1,ABCA2,PIP4K2A,NRGN,SLC1A2,PTPRK,MAN2A1,CLMN,NFIA,CLDN11,NEFL,NRG1,LINGO2,CRYAB,RELN,LDLRAD4,MBP,TNR,PHLPP1,CLU,SH3GL3,ALCAM,ZSWIM6,CHST11,DLG1,B2M,MEF2A,QDPR,APLP1,GRID2,EDIL3,MAP4K4,DLC1,FUT8,CHRM3,FOXN3,DOCK10,FRYL,DSCAM,YWHAH,DCC,SHTN1,PTK2,CAMK2B,ACTB,MBNL1,GPM6B,TJP1,FAIM2,PRKCB,UNC5C,ERBB4,NCAM2,…	In_3/3_up		GO:CC	site of polarized growth	GO:0030427	1.17407e-06	5.93031	196	32	7	18956	CALM1,HSP90AA1,SNAP25,MAP1B,APP,STMN2,GPM6A	Ex_3/3_down
GO:BP	anatomical structure development	GO:0048856	8.46341e-07	6.07245	6143	172	95	18017	SLC26A3,DHFR,LINGO1,SPP1,TF,ENC1,ARHGAP24,LAMA2,PLP1,TSHZ2,SLC1A3,CBLN2,CNP,APOE,GRIN1,GAB1,MOBP,ADGRV1,ABCA2,DOCK5,PIP4K2A,NRGN,SLC1A2,PTPRK,MAN2A1,CLMN,CDH20,NFIA,CLDN11,NEFL,NRG1,LINGO2,CRYAB,RELN,LDLRAD4,MBP,TNR,PHLPP1,CLU,SH3GL3,ALCAM,ZSWIM6,CHST11,DLG1,B2M,MEF2A,QDPR,APLP1,GRID2,EDIL3,MAP4K4,DLC1,FUT8,CHRM3,FOXN3,DOCK10,FRYL,DSCAM,YWHAH,DCC,SHTN1,PTK2,CAMK2B,ACTB,MBNL1,GPM6B,TJP1,FAIM2,PRKC…	In_3/3_up		GO:CC	axon	GO:0030424	2.18476e-06	5.6606	658	32	10	18956	CALM1,HSP90AA1,SNAP25,MAP1B,CCK,APP,STMN2,NRCAM,UCHL1,GPM6A	Ex_3/3_down
GO:BP	movement of cell or subcellular component	GO:0006928	9.10947e-07	6.04051	2301	172	50	18017	TF,ARHGAP24,DOCK8,LAMA2,APOE,GAB1,DOCK5,PTPRK,ARHGAP21,GPC5,NEFL,NRG1,TMSB10,PDE4B,RELN,LDLRAD4,TNR,ALCAM,CACNA2D1,ZSWIM6,DLG1,ELMO1,CTNNA3,MAP4K4,DLC1,FUT8,DOCK10,DSCAM,DCC,SHTN1,PTK2,CAMK2B,ACTB,TJP1,ATP8A1,UNC5C,ERBB4,CACNB2,DOCK4,THY1,SSH2,HDAC9,FMNL2,BCAS3,TMEFF2,PPP3CA,SGK1,ROBO1,DYNLL1,NDRG4	In_3/3_up		GO:CC	cell junction	GO:0030054	7.89674e-06	5.10255	2058	32	15	18956	CALM1,RTN4,SNAP25,AHI1,MAP1B,CCK,ATP1B1,CLASP2,APP,PLCB1,NRXN3,NRCAM,GPHN,YWHAH,GPM6A	Ex_3/3_down
GO:BP	regulation of cellular component organization	GO:0051128	9.10947e-07	6.04051	2450	172	52	18017	LINGO1,SPP1,TF,ENC1,ARHGAP24,CBLN2,C10ORF90,APOE,GRIN1,ABCA2,PIP4K2A,HIP1,NEFL,NRG1,LINGO2,TMSB10,CRYAB,RELN,LDLRAD4,TNR,CLU,SH3GL3,ZSWIM6,DLG1,B2M,IQCJ-SCHIP1,GRID2,MAP4K4,DLC1,DSCAM,YWHAH,DCC,SHTN1,PTK2,CAMK2B,DNAJC6,PRNP,GPM6B,TJP1,ATP8A1,PRKCB,FCHSD2,ASIC2,THY1,SSH2,BCAS3,TMEFF2,PPP3CA,SGK1,ROBO1,CSMD3,NDRG4	In_3/3_up		GO:CC	cytosol	GO:0005829	3.43599e-05	4.46395	5223	32	22	18956	CALM1,HSP90AA1,STMN1,PEBP1,SNAP25,FTH1,DYNLL1,AHI1,MAP1B,CHN1,TMSB4X,KALRN,VSNL1,CLASP2,APP,CKB,PLCB1,UCHL1,GPHN,YWHAH,RGS7,MAPK10	Ex_3/3_down
GO:BP	regulation of cell morphogenesis	GO:0022604	1.38569e-06	5.85833	506	172	21	18017	LINGO1,SPP1,APOE,GRIN1,DOCK5,NEFL,RELN,TNR,ZSWIM6,DLG1,DLC1,DSCAM,YWHAH,DCC,SHTN1,PTK2,CAMK2B,THY1,FMNL2,PPP3CA,ROBO1	In_3/3_up		GO:CC	synapse	GO:0045202	0.000105999	3.9747	1293	32	11	18956	CALM1,RTN4,SNAP25,MAP1B,CCK,APP,PLCB1,NRXN3,NRCAM,GPHN,GPM6A	Ex_3/3_down
GO:BP	modulation of chemical synaptic transmission	GO:0050804	1.75453e-06	5.75584	420	172	19	18017	LAMA2,SLC1A3,APOE,GRIN1,GRM3,NRGN,RELN,TNR,GRID2,YWHAH,DCC,PLCL1,CAMK2B,PRNP,GRM7,PRKCB,CACNB2,PPP3CA,DGKB	In_3/3_up		GO:CC	main axon	GO:0044304	0.000108965	3.96271	69	32	4	18956	MAP1B,CCK,APP,NRCAM	Ex_3/3_down
GO:BP	regulation of trans-synaptic signaling	GO:0099177	1.78283e-06	5.74889	421	172	19	18017	LAMA2,SLC1A3,APOE,GRIN1,GRM3,NRGN,RELN,TNR,GRID2,YWHAH,DCC,PLCL1,CAMK2B,PRNP,GRM7,PRKCB,CACNB2,PPP3CA,DGKB	In_3/3_up		GO:CC	postsynapse	GO:0098794	0.000896183	3.0476	591	32	7	18956	RTN4,SNAP25,MAP1B,APP,PLCB1,GPHN,GPM6A	Ex_3/3_down
GO:BP	multicellular organismal process	GO:0032501	2.31738e-06	5.635	7992	172	112	18017	SLC26A3,DHFR,LINGO1,SPP1,TF,ENC1,ARHGAP24,DOCK8,LAMA2,PLP1,PTGDS,TSHZ2,SLC1A3,CBLN2,CNP,APOE,GRIN1,GAB1,MOBP,ADGRV1,ABCA2,DOCK5,PIP4K2A,NRGN,SLC1A2,PTPRK,MAN2A1,CLMN,NFIA,CLDN11,NEFL,POLR2F,NRG1,LINGO2,ITPR2,PDE4B,CRYAB,RELN,LDLRAD4,MBP,TNR,PDE1C,PHLPP1,CLU,SH3GL3,LHFPL3,ZBTB20,ALCAM,CACNA2D1,ZSWIM6,CHST11,DLG1,B2M,SLC44A1,MEF2A,QDPR,APLP1,GRID2,EDIL3,CTNNA3,MAP4K4,DLC1,FUT8,CHRM3,CACNA2D3,FOXN3,…	In_3/3_up		GO:CC	dendritic tree	GO:0097447	0.00117232	2.93095	629	32	7	18956	HSP90AA1,MAP1B,CCK,APP,CKB,GPHN,GPM6A	Ex_3/3_down
GO:BP	regulation of axonogenesis	GO:0050770	2.5777e-06	5.58877	189	172	13	18017	LINGO1,SPP1,APOE,GRIN1,NEFL,TNR,ZSWIM6,DSCAM,DCC,SHTN1,PTK2,THY1,ROBO1	In_3/3_up		GO:CC	dendrite	GO:0030425	0.00117232	2.93095	627	32	7	18956	HSP90AA1,MAP1B,CCK,APP,CKB,GPHN,GPM6A	Ex_3/3_down
GO:BP	negative regulation of cell projection organization	GO:0031345	2.6883e-06	5.57052	190	172	13	18017	LINGO1,SPP1,ARHGAP24,APOE,TNR,B2M,MAP4K4,YWHAH,DCC,PTK2,PRNP,THY1,PPP3CA	In_3/3_up		GO:CC	microtubule	GO:0005874	0.00123553	2.90815	436	32	6	18956	CALM1,STMN1,TUBA1B,DYNLL1,MAP1B,CLASP2	Ex_3/3_down
GO:BP	regulation of transport	GO:0051049	3.05551e-06	5.51492	1887	172	43	18017	SPP1,TF,APOE,GRIN1,KCNH8,ABCA2,SLC1A2,HIP1,NEFL,NRG1,ITPR2,PDE4B,CRYAB,RELN,CLU,SH3GL3,CACNA2D1,DLG1,B2M,MEF2A,MAP4K4,CHRM3,CACNA2D3,YWHAH,CAMK2B,ACTB,DNAJC6,PRNP,GPM6B,GRM7,ATP8A1,PRKCB,ASIC2,CACNB2,NKAIN2,THY1,HDAC9,KCNQ5,BCAS3,PPP3CA,SGK1,CADM1,NDRG4	In_3/3_up		GO:CC	perikaryon	GO:0043204	0.00214077	2.66943	159	32	4	18956	MAP1B,CCK,APP,MAPK10	Ex_3/3_down
GO:BP	axonogenesis	GO:0007409	3.30964e-06	5.48022	488	172	20	18017	LINGO1,SPP1,LAMA2,CNP,APOE,GRIN1,GAB1,NEFL,RELN,TNR,ALCAM,ZSWIM6,DSCAM,DCC,SHTN1,PTK2,ACTB,UNC5C,THY1,ROBO1	In_3/3_up		GO:CC	presynapse	GO:0098793	0.00240624	2.61866	502	32	6	18956	CALM1,SNAP25,CCK,APP,NRXN3,GPM6A	Ex_3/3_down
GO:BP	regulation of neuron differentiation	GO:0045664	3.31338e-06	5.47973	693	172	24	18017	LINGO1,SPP1,ENC1,APOE,GRIN1,NEFL,RELN,TNR,SH3GL3,ZSWIM6,B2M,GRID2,MAP4K4,DSCAM,YWHAH,DCC,SHTN1,PTK2,CAMK2B,THY1,PPP3CA,ROBO1,CSMD3,NDRG4	In_3/3_up		GO:CC	cytoskeleton	GO:0005856	0.0028064	2.55185	2291	32	12	18956	CALM1,STMN1,SNAP25,TUBA1B,DYNLL1,AHI1,MAP1B,TMSB4X,KALRN,CLASP2,APP,GPHN	Ex_3/3_down
GO:BP	negative regulation of cellular component organization	GO:0051129	3.47725e-06	5.45876	750	172	25	18017	LINGO1,SPP1,ARHGAP24,APOE,ABCA2,TMSB10,CRYAB,LDLRAD4,TNR,CLU,SH3GL3,B2M,IQCJ-SCHIP1,MAP4K4,DLC1,YWHAH,DCC,PTK2,PRNP,TJP1,THY1,SSH2,BCAS3,TMEFF2,PPP3CA	In_3/3_up		GO:CC	vesicle	GO:0031982	0.0039445	2.40401	4036	32	16	18956	CALM1,HSP90AA1,STMN1,PEBP1,SNAP25,FTH1,DYNLL1,TMSB4X,ATP1B1,KALRN,APP,CKB,PLCB1,STMN2,YWHAH,GPM6A	Ex_3/3_down
GO:BP	regulation of neurogenesis	GO:0050767	3.78995e-06	5.42137	867	172	27	18017	LINGO1,SPP1,ENC1,APOE,GRIN1,MAN2A1,NEFL,NRG1,RELN,TNR,SH3GL3,ZSWIM6,B2M,GRID2,MAP4K4,DSCAM,YWHAH,DCC,SHTN1,PTK2,CAMK2B,ERBB4,THY1,PPP3CA,ROBO1,CSMD3,NDRG4	In_3/3_up		GO:CC	axon initial segment	GO:0043194	0.00404505	2.39308	16	32	2	18956	CCK,NRCAM	Ex_3/3_down
GO:BP	developmental process	GO:0032502	5.21012e-06	5.28315	6676	172	98	18017	SLC26A3,DHFR,LINGO1,SPP1,TF,ENC1,ARHGAP24,LAMA2,PLP1,TSHZ2,SLC1A3,CBLN2,CNP,APOE,GRIN1,GAB1,MOBP,ADGRV1,ABCA2,DOCK5,PIP4K2A,NRGN,SLC1A2,PTPRK,HIP1,MAN2A1,CLMN,CDH20,NFIA,CLDN11,NEFL,POLR2F,NRG1,LINGO2,CRYAB,RELN,LDLRAD4,MBP,TNR,PHLPP1,CLU,SH3GL3,ALCAM,ZSWIM6,CHST11,DLG1,B2M,MEF2A,QDPR,APLP1,GRID2,EDIL3,MAP4K4,DLC1,FUT8,CHRM3,FOXN3,DOCK10,FRYL,DSCAM,YWHAH,DCC,SHTN1,PTK2,CAMK2B,ACTB,MBNL1,PRNP,GPM6…	In_3/3_up		GO:CC	extracellular exosome	GO:0070062	0.00598774	2.22274	2143	32	11	18956	HSP90AA1,STMN1,PEBP1,FTH1,ATP1B1,KALRN,APP,CKB,PLCB1,YWHAH,GPM6A	Ex_3/3_down
GO:BP	cell migration	GO:0016477	5.40176e-06	5.26746	1651	172	39	18017	ARHGAP24,DOCK8,LAMA2,APOE,GAB1,DOCK5,PTPRK,GPC5,NRG1,TMSB10,PDE4B,RELN,LDLRAD4,TNR,ZSWIM6,ELMO1,MAP4K4,DLC1,FUT8,DOCK10,DCC,SHTN1,PTK2,CAMK2B,TJP1,ATP8A1,UNC5C,ERBB4,DOCK4,THY1,SSH2,HDAC9,FMNL2,BCAS3,TMEFF2,PPP3CA,SGK1,ROBO1,NDRG4	In_3/3_up		GO:CC	extracellular vesicle	GO:1903561	0.00836481	2.07754	2244	32	11	18956	HSP90AA1,STMN1,PEBP1,FTH1,ATP1B1,KALRN,APP,CKB,PLCB1,YWHAH,GPM6A	Ex_3/3_down
GO:BP	central nervous system development	GO:0007417	5.49901e-06	5.25972	1065	172	30	18017	PLP1,CNP,GRIN1,ABCA2,NRGN,SLC1A2,NEFL,NRG1,RELN,MBP,TNR,CLU,SH3GL3,ZSWIM6,B2M,GRID2,DLC1,YWHAH,DCC,PTK2,ACTB,FAIM2,UNC5C,ERBB4,PSAP,ASIC2,PPP3CA,ROBO1,DYNLL1,NDRG4	In_3/3_up		GO:CC	extracellular organelle	GO:0043230	0.00836481	2.07754	2249	32	11	18956	HSP90AA1,STMN1,PEBP1,FTH1,ATP1B1,KALRN,APP,CKB,PLCB1,YWHAH,GPM6A	Ex_3/3_down
GO:BP	regulation of cell development	GO:0060284	5.62618e-06	5.24979	1006	172	29	18017	LINGO1,SPP1,ENC1,APOE,GRIN1,DOCK5,MAN2A1,NEFL,NRG1,RELN,TNR,SH3GL3,ZSWIM6,B2M,GRID2,MAP4K4,DSCAM,YWHAH,DCC,SHTN1,PTK2,CAMK2B,ERBB4,THY1,HDAC9,PPP3CA,ROBO1,CSMD3,NDRG4	In_3/3_up		KEGG	Insulin secretion	KEGG:04911	0.00759284	2.1196	86	20	4	7963	SNAP25,CCK,ATP1B1,PLCB1	Ex_3/3_down
GO:BP	netrin-activated signaling pathway	GO:0038007	5.67078e-06	5.24636	13	172	5	18017	DSCAM,DCC,SHTN1,PTK2,UNC5C	In_3/3_up		HPA	cerebral cortex; neuropil[‚â•Medium]	HPA:0100212	2.00898e-05	4.69703	2596	25	19	10719	RTN4,STMN1,SNAP25,FTH1,TUBA1B,MAP1B,TMSB4X,ATP1B1,KALRN,RTN1,CKB,PLCB1,NRXN3,NRCAM,UCHL1,GPHN,RGS7,MAPK10,GPM6A	Ex_3/3_down
GO:BP	locomotion	GO:0040011	6.29493e-06	5.20101	2020	172	44	18017	TF,ARHGAP24,DOCK8,LAMA2,APOE,GAB1,DOCK5,PTPRK,GPC5,NEFL,NRG1,TMSB10,PDE4B,RELN,LDLRAD4,TNR,ALCAM,ZSWIM6,ELMO1,MAP4K4,DLC1,FUT8,DOCK10,DSCAM,DCC,SHTN1,PTK2,CAMK2B,ACTB,TJP1,ATP8A1,UNC5C,ERBB4,DOCK4,THY1,SSH2,HDAC9,FMNL2,BCAS3,TMEFF2,PPP3CA,SGK1,ROBO1,NDRG4	In_3/3_up		GO:MF	kainate selective glutamate receptor activity	GO:0015277	0.00634214	2.19776	5	30	2	18602	GRIK2,GRIK1	In_3/3_down
GO:BP	regulation of multicellular organismal process	GO:0051239	7.40497e-06	5.13048	3441	172	62	18017	LINGO1,SPP1,TF,ENC1,LAMA2,PTGDS,CBLN2,APOE,GRIN1,GAB1,ADGRV1,DOCK5,MAN2A1,NEFL,POLR2F,NRG1,LINGO2,ITPR2,PDE4B,RELN,LDLRAD4,MBP,TNR,PHLPP1,CLU,SH3GL3,ZBTB20,CACNA2D1,ZSWIM6,DLG1,B2M,MEF2A,GRID2,CTNNA3,MAP4K4,CHRM3,CACNA2D3,DSCAM,YWHAH,DCC,SHTN1,PTK2,PLCL1,CAMK2B,PRNP,GPM6B,TJP1,PRKCB,ERBB4,ASIC2,CACNB2,DOCK4,THY1,HDAC9,BCAS3,PKM,PPP3CA,SGK1,CADM1,ROBO1,CSMD3,NDRG4	In_3/3_up		GO:MF	nitric-oxide synthase regulator activity	GO:0030235	0.0088523	2.05294	8	30	2	18602	CALM1,HSP90AA1	In_3/3_down
GO:BP	positive regulation of multicellular organismal process	GO:0051240	7.75441e-06	5.11045	1894	172	42	18017	SPP1,TF,ENC1,CBLN2,APOE,GRIN1,GAB1,ADGRV1,DOCK5,MAN2A1,NEFL,POLR2F,NRG1,LINGO2,PDE4B,RELN,MBP,TNR,CLU,SH3GL3,ZBTB20,B2M,MEF2A,GRID2,MAP4K4,CHRM3,DSCAM,SHTN1,PTK2,CAMK2B,GPM6B,TJP1,PRKCB,ERBB4,ASIC2,HDAC9,BCAS3,PKM,PPP3CA,CADM1,ROBO1,NDRG4	In_3/3_up		GO:BP	nervous system development	GO:0007399	3.83396e-06	5.41635	2483	29	18	18017	RBFOX1,AHI1,CALM1,NRXN3,AUTS2,HSP90AA1,MAGI2,RORA,FGF12,FGF14,DAB1,SYT1,RTN4,MDGA2,CNTNAP2,GRIK1,CTNND2,ADGRB3	In_3/3_down
GO:BP	localization of cell	GO:0051674	7.75441e-06	5.11045	1823	172	41	18017	TF,ARHGAP24,DOCK8,LAMA2,APOE,GAB1,DOCK5,PTPRK,GPC5,NRG1,TMSB10,PDE4B,RELN,LDLRAD4,TNR,ZSWIM6,ELMO1,MAP4K4,DLC1,FUT8,DOCK10,DCC,SHTN1,PTK2,CAMK2B,ACTB,TJP1,ATP8A1,UNC5C,ERBB4,DOCK4,THY1,SSH2,HDAC9,FMNL2,BCAS3,TMEFF2,PPP3CA,SGK1,ROBO1,NDRG4	In_3/3_up		GO:BP	neuron differentiation	GO:0030182	8.44071e-05	4.07362	1437	29	13	18017	AHI1,NRXN3,AUTS2,HSP90AA1,MAGI2,RORA,DAB1,SYT1,RTN4,MDGA2,CNTNAP2,CTNND2,ADGRB3	In_3/3_down
GO:BP	cell motility	GO:0048870	7.75441e-06	5.11045	1823	172	41	18017	TF,ARHGAP24,DOCK8,LAMA2,APOE,GAB1,DOCK5,PTPRK,GPC5,NRG1,TMSB10,PDE4B,RELN,LDLRAD4,TNR,ZSWIM6,ELMO1,MAP4K4,DLC1,FUT8,DOCK10,DCC,SHTN1,PTK2,CAMK2B,ACTB,TJP1,ATP8A1,UNC5C,ERBB4,DOCK4,THY1,SSH2,HDAC9,FMNL2,BCAS3,TMEFF2,PPP3CA,SGK1,ROBO1,NDRG4	In_3/3_up		GO:BP	anterograde trans-synaptic signaling	GO:0098916	0.000108825	3.96327	694	29	9	18017	DLGAP1,CALM1,NRXN3,FGF12,FGF14,DLG2,SYT1,GRIK2,GRIK1	In_3/3_down
GO:BP	circulatory system process	GO:0003013	1.46518e-05	4.83411	649	172	22	18017	SLC1A3,APOE,ABCA2,DOCK5,SLC1A2,ITPR2,PDE4B,CACNA2D1,DLG1,SLC44A1,MEF2A,CTNNA3,CHRM3,CACNA2D3,SLCO3A1,TJP1,ATP8A1,ASIC2,CACNB2,DOCK4,SGCZ,SGK1	In_3/3_up		GO:BP	regulation of synaptic vesicle cycle	GO:0098693	0.000108825	3.96327	95	29	5	18017	CALM1,NRXN3,MAGI2,FGF14,SYT1	In_3/3_down
GO:BP	negative regulation of neuron projection development	GO:0010977	1.71713e-05	4.7652	156	172	11	18017	LINGO1,SPP1,APOE,TNR,B2M,MAP4K4,YWHAH,DCC,PTK2,THY1,PPP3CA	In_3/3_up		GO:BP	trans-synaptic signaling	GO:0099537	0.000108825	3.96327	702	29	9	18017	DLGAP1,CALM1,NRXN3,FGF12,FGF14,DLG2,SYT1,GRIK2,GRIK1	In_3/3_down
GO:BP	regulation of biological quality	GO:0065008	1.78e-05	4.74958	4133	172	69	18017	SLC26A3,SPP1,TF,DOCK8,LAMA2,SLC1A3,CBLN2,C10ORF90,CNP,APOE,GRIN1,KCNH8,ADGRV1,ABCA2,DOCK5,NRGN,ARHGAP21,HIP1,TMEM165,NEFL,LINGO2,ITPR2,TMSB10,PDE4B,CRYAB,RELN,MBP,TNR,CLU,ZBTB20,CACNA2D1,DLG1,B2M,GRID2,CTNNA3,MAP4K4,DLC1,CHRM3,DOCK10,DSCAM,YWHAH,DCC,SHTN1,PTK2,PLCL1,CAMK2B,ACTB,SLC9A9,PRNP,GPM6B,TJP1,ATP8A1,PRKCB,TMTC2,ERBB4,FCHSD2,ASIC2,PCDH15,CACNB2,DOCK4,THY1,SSH2,HDAC9,FMNL2,SGCZ,PPP3CA,SGK1,…	In_3/3_up		GO:BP	localization within membrane	GO:0051668	0.000108825	3.96327	97	29	5	18017	ATP1B1,MAGI2,DLG2,GPHN,GRIK2	In_3/3_down
GO:BP	regulation of cell junction assembly	GO:1901888	2.33215e-05	4.63224	197	172	12	18017	CBLN2,GRIN1,LINGO2,GRID2,MAP4K4,DLC1,PTK2,GPM6B,TJP1,ASIC2,THY1,BCAS3	In_3/3_up		GO:BP	plasma membrane bounded cell projection morphogenesis	GO:0120039	0.000108825	3.96327	692	29	9	18017	NRXN3,AUTS2,HSP90AA1,DAB1,SYT1,RTN4,CNTNAP2,CTNND2,ADGRB3	In_3/3_down
GO:BP	regulation of ion transport	GO:0043269	2.36944e-05	4.62535	726	172	23	18017	TF,APOE,GRIN1,KCNH8,NEFL,PDE4B,RELN,CACNA2D1,DLG1,B2M,CHRM3,CACNA2D3,YWHAH,CAMK2B,PRNP,GPM6B,GRM7,ATP8A1,ASIC2,CACNB2,NKAIN2,THY1,KCNQ5	In_3/3_up		GO:BP	neuron development	GO:0048666	0.000108825	3.96327	1167	29	11	18017	AHI1,NRXN3,AUTS2,HSP90AA1,MAGI2,DAB1,SYT1,RTN4,CNTNAP2,CTNND2,ADGRB3	In_3/3_down
GO:BP	brain development	GO:0007420	2.3764e-05	4.62408	784	172	24	18017	PLP1,CNP,GRIN1,NRGN,SLC1A2,NEFL,NRG1,RELN,MBP,TNR,ZSWIM6,B2M,GRID2,DLC1,YWHAH,ACTB,FAIM2,UNC5C,ERBB4,PSAP,PPP3CA,ROBO1,DYNLL1,NDRG4	In_3/3_up		GO:BP	signaling	GO:0023052	0.000108825	3.96327	6814	29	24	18017	AHI1,SPARCL1,DLGAP1,CALM1,ATP1B1,NRXN3,AUTS2,HSP90AA1,MAGI2,RORA,FGF12,TMSB4X,FGF14,ANKS1B,DLG2,DAB1,SYT1,RTN4,PEBP1,CNTNAP2,GRIK2,GRIK1,CTNND2,ADGRB3	In_3/3_down
GO:BP	ion transport	GO:0006811	4.09364e-05	4.38789	1730	172	38	18017	SLC26A3,TF,SLC5A11,SLC1A3,APOE,GRIN1,KCNH8,SLC1A2,TMEM165,NEFL,ITPR2,PDE4B,RELN,CACNA2D1,DLG1,B2M,SLC44A1,GRID2,CHRM3,CACNA2D3,YWHAH,SLCO3A1,CAMK2B,SLC9A9,PRNP,GPM6B,GRM7,ATP8A1,PRKCB,PSAP,ASIC2,CACNB2,NKAIN2,THY1,KCNQ5,PPP3CA,SGK1,FTL	In_3/3_up		GO:BP	neuron projection morphogenesis	GO:0048812	0.000108825	3.96327	678	29	9	18017	NRXN3,AUTS2,HSP90AA1,DAB1,SYT1,RTN4,CNTNAP2,CTNND2,ADGRB3	In_3/3_down
GO:BP	cation transport	GO:0006812	5.24645e-05	4.28013	1197	172	30	18017	TF,SLC5A11,SLC1A3,GRIN1,KCNH8,TMEM165,NEFL,ITPR2,PDE4B,RELN,CACNA2D1,DLG1,B2M,SLC44A1,CACNA2D3,YWHAH,CAMK2B,SLC9A9,PRNP,GPM6B,ATP8A1,PRKCB,ASIC2,CACNB2,NKAIN2,THY1,KCNQ5,PPP3CA,SGK1,FTL	In_3/3_up		GO:BP	cell communication	GO:0007154	0.000108825	3.96327	6828	29	24	18017	AHI1,SPARCL1,DLGAP1,CALM1,ATP1B1,NRXN3,AUTS2,HSP90AA1,MAGI2,RORA,FGF12,TMSB4X,FGF14,ANKS1B,DLG2,DAB1,SYT1,RTN4,PEBP1,CNTNAP2,GRIK2,GRIK1,CTNND2,ADGRB3	In_3/3_down
GO:BP	head development	GO:0060322	6.14363e-05	4.21157	829	172	24	18017	PLP1,CNP,GRIN1,NRGN,SLC1A2,NEFL,NRG1,RELN,MBP,TNR,ZSWIM6,B2M,GRID2,DLC1,YWHAH,ACTB,FAIM2,UNC5C,ERBB4,PSAP,PPP3CA,ROBO1,DYNLL1,NDRG4	In_3/3_up		GO:BP	generation of neurons	GO:0048699	0.000108825	3.96327	1605	29	13	18017	AHI1,NRXN3,AUTS2,HSP90AA1,MAGI2,RORA,DAB1,SYT1,RTN4,MDGA2,CNTNAP2,CTNND2,ADGRB3	In_3/3_down
GO:BP	metal ion transport	GO:0030001	9.33837e-05	4.02973	911	172	25	18017	TF,SLC5A11,SLC1A3,GRIN1,KCNH8,TMEM165,ITPR2,PDE4B,CACNA2D1,DLG1,B2M,CACNA2D3,YWHAH,CAMK2B,SLC9A9,PRNP,PRKCB,ASIC2,CACNB2,NKAIN2,THY1,KCNQ5,PPP3CA,SGK1,FTL	In_3/3_up		GO:BP	chemical synaptic transmission	GO:0007268	0.000108825	3.96327	694	29	9	18017	DLGAP1,CALM1,NRXN3,FGF12,FGF14,DLG2,SYT1,GRIK2,GRIK1	In_3/3_down
GO:BP	cellular component organization	GO:0016043	0.000104715	3.97999	6499	172	92	18017	DHFR,LINGO1,SPP1,TF,ENC1,ARHGAP24,LAMA2,PLP1,CBLN2,C10ORF90,CNP,APOE,GRIN1,GAB1,ADGRV1,ABCA2,PIP4K2A,SLC1A2,PTPRK,ARHGAP21,HIP1,MAN2A1,CLMN,CDH20,TMEM165,NFIA,NCKAP5,CLDN11,NEFL,NRG1,LINGO2,TMSB10,CRYAB,RELN,LDLRAD4,MBP,TNR,CLU,SH3GL3,ALCAM,FBXL7,ZSWIM6,DLG1,B2M,MEF2A,ELMO1,IQCJ-SCHIP1,GRID2,MAP4K4,DLC1,DOCK10,FRYL,PEX5L,DSCAM,YWHAH,DCC,SHTN1,PTK2,CAMK2B,ACTB,DNAJC6,PRNP,GPM6B,TJP1,ATP8A1,PRKCB,U…	In_3/3_up		GO:BP	cell projection morphogenesis	GO:0048858	0.000108825	3.96327	696	29	9	18017	NRXN3,AUTS2,HSP90AA1,DAB1,SYT1,RTN4,CNTNAP2,CTNND2,ADGRB3	In_3/3_down
GO:BP	small GTPase mediated signal transduction	GO:0007264	0.000107041	3.97045	515	172	18	18017	RASGEF1B,ARHGAP24,DOCK8,ARAP2,APOE,DOCK5,ARHGAP21,NRG1,RELN,PSD3,ELMO1,MAP4K4,DLC1,DOCK10,SHTN1,DOCK4,ARHGAP26,ROBO1	In_3/3_up		GO:BP	neurogenesis	GO:0022008	0.000108825	3.96327	1710	29	13	18017	AHI1,NRXN3,AUTS2,HSP90AA1,MAGI2,RORA,DAB1,SYT1,RTN4,MDGA2,CNTNAP2,CTNND2,ADGRB3	In_3/3_down
GO:BP	regulation of system process	GO:0044057	0.000107041	3.97045	624	172	20	18017	APOE,GRIN1,DOCK5,ITPR2,PDE4B,RELN,TNR,CACNA2D1,DLG1,MEF2A,CTNNA3,CHRM3,CACNA2D3,PTK2,CAMK2B,ASIC2,CACNB2,DOCK4,PPP3CA,SGK1	In_3/3_up		GO:BP	cell part morphogenesis	GO:0032990	0.000120246	3.91993	716	29	9	18017	NRXN3,AUTS2,HSP90AA1,DAB1,SYT1,RTN4,CNTNAP2,CTNND2,ADGRB3	In_3/3_down
GO:BP	localization	GO:0051179	0.000118186	3.92744	6920	172	96	18017	SLC26A3,SPP1,TF,SLC5A11,ARHGAP24,DOCK8,LAMA2,PTGDS,TMEM144,SLC1A3,CNP,APOE,GRIN1,GAB1,KCNH8,ADGRV1,ABCA2,DOCK5,SLC1A2,PTPRK,ARHGAP21,HIP1,CLMN,TMEM165,GPC5,NEFL,NRG1,ITPR2,TMSB10,PDE4B,CRYAB,RELN,LDLRAD4,TNR,CLU,SH3GL3,CACNA2D1,ZSWIM6,CHST11,DLG1,B2M,SLC44A1,MEF2A,ELMO1,APLP1,GRID2,CTNNA3,MAP4K4,DLC1,FUT8,CHRM3,CACNA2D3,DOCK10,PEX5L,DSCAM,YWHAH,DCC,SHTN1,SLCO3A1,AGAP1,PTK2,CAMK2B,ACTB,SLC9A9,DNAJ…	In_3/3_up		GO:BP	regulation of signaling	GO:0023051	0.000123212	3.90935	3699	29	18	18017	CALM1,ATP1B1,NRXN3,AUTS2,HSP90AA1,MAGI2,RORA,FGF12,TMSB4X,FGF14,DLG2,DAB1,SYT1,RTN4,PEBP1,GRIK2,GRIK1,CTNND2	In_3/3_down
GO:BP	regulation of cellular component biogenesis	GO:0044087	0.000118186	3.92744	989	172	26	18017	ARHGAP24,CBLN2,C10ORF90,APOE,GRIN1,ABCA2,PIP4K2A,NRG1,LINGO2,TMSB10,CRYAB,LDLRAD4,CLU,DLG1,GRID2,MAP4K4,DLC1,PTK2,GPM6B,TJP1,FCHSD2,ASIC2,THY1,SSH2,BCAS3,TMEFF2	In_3/3_up		GO:BP	synaptic signaling	GO:0099536	0.000123212	3.90935	724	29	9	18017	DLGAP1,CALM1,NRXN3,FGF12,FGF14,DLG2,SYT1,GRIK2,GRIK1	In_3/3_down
GO:BP	actin filament-based process	GO:0030029	0.000140748	3.85156	813	172	23	18017	TF,GAB1,HIP1,TMSB10,PDE4B,CACNA2D1,DLG1,MEF2A,ELMO1,CTNNA3,DLC1,SHTN1,ACTB,GPM6B,TJP1,FCHSD2,PCDH15,CACNB2,ARHGAP26,SSH2,FMNL2,BCAS3,TMEFF2	In_3/3_up		GO:BP	receptor clustering	GO:0043113	0.000177243	3.75143	57	29	4	18017	MAGI2,DLG2,GPHN,GRIK2	In_3/3_down
GO:BP	positive regulation of molecular function	GO:0044093	0.000146077	3.83542	1833	172	38	18017	DHFR,TF,ARHGAP24,DOCK8,ARAP2,APOE,GRIN1,ST18,DOCK5,ARHGAP21,HIP1,NRG1,RELN,MBP,CLU,CACNA2D1,DLG1,B2M,MAP4K4,DLC1,DOCK10,SLCO3A1,AGAP1,PTK2,PLCL1,PRNP,PRKCB,ERBB4,PSAP,CACNB2,DOCK4,THY1,ARHGAP26,BCAS3,PPP3CA,SGK1,ROBO1,DYNLL1	In_3/3_up		GO:BP	neuron projection development	GO:0031175	0.000220131	3.65732	1030	29	10	18017	NRXN3,AUTS2,HSP90AA1,MAGI2,DAB1,SYT1,RTN4,CNTNAP2,CTNND2,ADGRB3	In_3/3_down
GO:BP	substantia nigra development	GO:0021762	0.000163432	3.78666	44	172	6	18017	PLP1,CNP,MBP,YWHAH,ACTB,DYNLL1	In_3/3_up		GO:BP	cellular component morphogenesis	GO:0032989	0.000259052	3.58661	812	29	9	18017	NRXN3,AUTS2,HSP90AA1,DAB1,SYT1,RTN4,CNTNAP2,CTNND2,ADGRB3	In_3/3_down
GO:BP	regulation of transmembrane transport	GO:0034762	0.000165049	3.78239	589	172	19	18017	GRIN1,KCNH8,SLC1A2,NEFL,PDE4B,RELN,CACNA2D1,DLG1,MEF2A,CHRM3,CACNA2D3,YWHAH,ACTB,PRNP,PRKCB,ASIC2,CACNB2,THY1,KCNQ5	In_3/3_up		GO:BP	central nervous system development	GO:0007417	0.000265177	3.57646	1065	29	10	18017	AHI1,CALM1,HSP90AA1,RORA,DAB1,SYT1,RTN4,MDGA2,CNTNAP2,GRIK1	In_3/3_down
GO:BP	system process	GO:0003008	0.000168347	3.77379	2303	172	44	18017	SLC26A3,SLC1A3,APOE,GRIN1,ADGRV1,ABCA2,DOCK5,NRGN,SLC1A2,NEFL,ITPR2,PDE4B,CRYAB,RELN,MBP,TNR,PDE1C,LHFPL3,CACNA2D1,DLG1,B2M,SLC44A1,MEF2A,GRID2,CTNNA3,CHRM3,CACNA2D3,SLCO3A1,PTK2,CAMK2B,PRNP,GRM7,TJP1,ATP8A1,NCAM2,PSAP,ASIC2,PCDH15,CACNB2,DOCK4,SGCZ,PPP3CA,SGK1,NDRG4	In_3/3_up		GO:BP	regulation of ion transmembrane transporter activity	GO:0032412	0.000265177	3.57646	268	29	6	18017	CALM1,ATP1B1,FGF12,TMSB4X,FGF14,DLG2	In_3/3_down
GO:BP	negative regulation of cell morphogenesis involved in differentiation	GO:0010771	0.000193268	3.71384	98	172	8	18017	LINGO1,SPP1,TNR,YWHAH,DCC,PTK2,THY1,PPP3CA	In_3/3_up		GO:BP	regulation of transmembrane transporter activity	GO:0022898	0.000320312	3.49443	279	29	6	18017	CALM1,ATP1B1,FGF12,TMSB4X,FGF14,DLG2	In_3/3_down
GO:BP	signaling	GO:0023052	0.000214041	3.6695	6814	172	94	18017	RASGEF1B,MTRNR2L8,MTRNR2L12,SPP1,TF,ARHGAP24,DOCK8,LAMA2,PLP1,ARAP2,SLC1A3,APBB1IP,CBLN2,CNP,APOE,GRIN1,GAB1,GRM3,ST18,ADGRV1,DOCK5,PIP4K2A,NRGN,SLC1A2,RNF220,PTPRK,ARHGAP21,HIP1,MAML2,GPC5,NEFL,POLR2F,NRG1,ITPR2,PDE1A,PDE4B,CRYAB,RELN,LDLRAD4,MBP,TNR,PDE1C,PHLPP1,CLU,SH3GL3,ALCAM,PSD3,CACNA2D1,CHST11,DLG1,B2M,MEF2A,ELMO1,APLP1,GRID2,CTNNA3,MAP4K4,DLC1,FUT8,CHRM3,CACNA2D3,DOCK10,PEX5L,DSCAM,YWHAH…	In_3/3_up		GO:BP	positive regulation of ion transport	GO:0043270	0.000391567	3.40719	291	29	6	18017	CALM1,ATP1B1,FGF12,TMSB4X,FGF14,SYT1	In_3/3_down
GO:BP	regulation of neuron migration	GO:2001222	0.000228827	3.64049	47	172	6	18017	NRG1,RELN,ZSWIM6,SHTN1,CAMK2B,ERBB4	In_3/3_up		GO:BP	regulation of transporter activity	GO:0032409	0.000399294	3.39871	294	29	6	18017	CALM1,ATP1B1,FGF12,TMSB4X,FGF14,DLG2	In_3/3_down
GO:BP	cell-cell signaling	GO:0007267	0.000245957	3.60914	1806	172	37	18017	SPP1,LAMA2,PLP1,SLC1A3,CBLN2,CNP,APOE,GRIN1,GRM3,NRGN,SLC1A2,RNF220,GPC5,ITPR2,RELN,MBP,TNR,CACNA2D1,DLG1,GRID2,MAP4K4,CHRM3,YWHAH,DCC,PLCL1,CAMK2B,PRNP,GRM7,PRKCB,FCHSD2,ASIC2,CACNB2,THY1,HDAC9,PPP3CA,CADM1,DGKB	In_3/3_up		GO:BP	regulation of cell communication	GO:0010646	0.000420913	3.37581	3659	29	17	18017	CALM1,NRXN3,AUTS2,HSP90AA1,MAGI2,RORA,FGF12,TMSB4X,FGF14,DLG2,DAB1,SYT1,RTN4,PEBP1,GRIK2,GRIK1,CTNND2	In_3/3_down
GO:BP	glutamate receptor signaling pathway	GO:0007215	0.000267835	3.57213	103	172	8	18017	GRIN1,GRM3,NEFL,RELN,DLG1,GRID2,PRNP,GRM7	In_3/3_up		GO:BP	synaptic vesicle cycle	GO:0099504	0.000506199	3.29568	177	29	5	18017	CALM1,NRXN3,MAGI2,FGF14,SYT1	In_3/3_down
GO:BP	behavior	GO:0007610	0.000279776	3.55319	615	172	19	18017	PTGDS,SLC1A3,CNP,APOE,GRIN1,ABCA2,NRGN,SLC1A2,NRG1,RELN,TNR,B2M,DSCAM,PRNP,ATP8A1,PSAP,PCDH15,SGK1,NDRG4	In_3/3_up		GO:BP	regulation of cation channel activity	GO:2001257	0.000633022	3.19858	187	29	5	18017	CALM1,FGF12,TMSB4X,FGF14,DLG2	In_3/3_down
GO:BP	cell differentiation	GO:0030154	0.000279776	3.55319	4388	172	68	18017	SLC26A3,DHFR,LINGO1,SPP1,TF,ENC1,ARHGAP24,LAMA2,PLP1,SLC1A3,CNP,APOE,GRIN1,GAB1,ADGRV1,ABCA2,DOCK5,PIP4K2A,PTPRK,HIP1,MAN2A1,CLMN,NEFL,NRG1,RELN,LDLRAD4,TNR,CLU,SH3GL3,ALCAM,ZSWIM6,CHST11,B2M,MEF2A,GRID2,MAP4K4,DOCK10,FRYL,DSCAM,YWHAH,DCC,SHTN1,PTK2,CAMK2B,ACTB,MBNL1,GPM6B,TJP1,FAIM2,PRKCB,UNC5C,ERBB4,NCAM2,PSAP,PCDH15,THY1,HDAC9,TTLL7,SGCZ,TMEFF2,PPP3CA,QKI,NTM,SGK1,CADM1,ROBO1,CSMD3,NDRG4	In_3/3_up		GO:BP	vesicle-mediated transport in synapse	GO:0099003	0.000633022	3.19858	188	29	5	18017	CALM1,NRXN3,MAGI2,FGF14,SYT1	In_3/3_down
GO:BP	negative regulation of neurogenesis	GO:0050768	0.000285377	3.54458	303	172	13	18017	LINGO1,SPP1,APOE,NRG1,TNR,B2M,MAP4K4,YWHAH,DCC,PTK2,ERBB4,THY1,PPP3CA	In_3/3_up		GO:BP	plasma membrane bounded cell projection organization	GO:0120036	0.000887519	3.05182	1567	29	11	18017	AHI1,NRXN3,AUTS2,HSP90AA1,MAGI2,DAB1,SYT1,RTN4,CNTNAP2,CTNND2,ADGRB3	In_3/3_down
GO:BP	cellular component organization or biogenesis	GO:0071840	0.000327268	3.4851	6686	172	92	18017	DHFR,LINGO1,SPP1,TF,ENC1,ARHGAP24,LAMA2,PLP1,CBLN2,C10ORF90,CNP,APOE,GRIN1,GAB1,ADGRV1,ABCA2,PIP4K2A,SLC1A2,PTPRK,ARHGAP21,HIP1,MAN2A1,CLMN,CDH20,TMEM165,NFIA,NCKAP5,CLDN11,NEFL,NRG1,LINGO2,TMSB10,CRYAB,RELN,LDLRAD4,MBP,TNR,CLU,SH3GL3,ALCAM,FBXL7,ZSWIM6,DLG1,B2M,MEF2A,ELMO1,IQCJ-SCHIP1,GRID2,MAP4K4,DLC1,DOCK10,FRYL,PEX5L,DSCAM,YWHAH,DCC,SHTN1,PTK2,CAMK2B,ACTB,DNAJC6,PRNP,GPM6B,TJP1,ATP8A1,PRKCB,U…	In_3/3_up		GO:BP	multicellular organismal signaling	GO:0035637	0.000923161	3.03472	206	29	5	18017	CALM1,ATP1B1,FGF12,CNTNAP2,GRIK2	In_3/3_down
GO:BP	negative regulation of amyloid fibril formation	GO:1905907	0.00033158	3.47941	5	172	3	18017	APOE,CRYAB,CLU	In_3/3_up		GO:BP	cellular localization	GO:0051641	0.00094328	3.02536	3487	29	16	18017	AHI1,CALM1,ATP1B1,NRXN3,HSP90AA1,MAGI2,TMSB4X,FGF14,DLG2,DAB1,FAM155A,SYT1,RTN4,GPHN,CNTNAP2,GRIK2	In_3/3_down
GO:BP	axon ensheathment	GO:0008366	0.000366866	3.43549	143	172	9	18017	PLP1,ABCA2,CLDN11,NRG1,MBP,CLU,DLG1,PSAP,QKI	In_3/3_up		GO:BP	regulation of cation transmembrane transport	GO:1904062	0.00094328	3.02536	357	29	6	18017	CALM1,ATP1B1,FGF12,TMSB4X,FGF14,DLG2	In_3/3_down
GO:BP	ensheathment of neurons	GO:0007272	0.000366866	3.43549	143	172	9	18017	PLP1,ABCA2,CLDN11,NRG1,MBP,CLU,DLG1,PSAP,QKI	In_3/3_up		GO:BP	cell projection organization	GO:0030030	0.00100397	2.99828	1608	29	11	18017	AHI1,NRXN3,AUTS2,HSP90AA1,MAGI2,DAB1,SYT1,RTN4,CNTNAP2,CTNND2,ADGRB3	In_3/3_down
GO:BP	cyclic nucleotide catabolic process	GO:0009214	0.000384375	3.41524	15	172	4	18017	CNP,PDE1A,PDE4B,PDE8A	In_3/3_up		GO:BP	positive regulation of ion transmembrane transporter activity	GO:0032414	0.00124352	2.90535	109	29	4	18017	CALM1,ATP1B1,TMSB4X,FGF14	In_3/3_down
GO:BP	transmembrane transport	GO:0055085	0.000403681	3.39396	1632	172	34	18017	SLC26A3,SLC5A11,TMEM144,SLC1A3,GRIN1,KCNH8,ABCA2,SLC1A2,TMEM165,NEFL,ITPR2,PDE4B,RELN,CLU,CACNA2D1,DLG1,SLC44A1,MEF2A,GRID2,CHRM3,CACNA2D3,PEX5L,YWHAH,SLCO3A1,ACTB,SLC9A9,PRNP,ATP8A1,PRKCB,ASIC2,CACNB2,THY1,KCNQ5,SGK1	In_3/3_up		GO:BP	cell morphogenesis	GO:0000902	0.00124571	2.90458	1058	29	9	18017	NRXN3,AUTS2,HSP90AA1,DAB1,SYT1,RTN4,CNTNAP2,CTNND2,ADGRB3	In_3/3_down
GO:BP	cell communication	GO:0007154	0.000408011	3.38933	6828	172	93	18017	RASGEF1B,MTRNR2L8,MTRNR2L12,SPP1,TF,ARHGAP24,DOCK8,LAMA2,PLP1,ARAP2,SLC1A3,APBB1IP,CBLN2,CNP,APOE,GRIN1,GAB1,GRM3,ST18,ADGRV1,DOCK5,PIP4K2A,NRGN,SLC1A2,RNF220,PTPRK,ARHGAP21,HIP1,MAML2,GPC5,NEFL,POLR2F,NRG1,ITPR2,PDE1A,PDE4B,CRYAB,RELN,LDLRAD4,MBP,TNR,PDE1C,PHLPP1,CLU,SH3GL3,ALCAM,PSD3,CACNA2D1,CHST11,DLG1,B2M,MEF2A,ELMO1,APLP1,GRID2,CTNNA3,MAP4K4,DLC1,FUT8,CHRM3,DOCK10,PEX5L,DSCAM,YWHAH,DCC,SHTN…	In_3/3_up		GO:BP	system development	GO:0048731	0.00142726	2.8455	5096	29	19	18017	RBFOX1,AHI1,CALM1,NRXN3,AUTS2,HSP90AA1,MAGI2,RORA,FGF12,KAZN,FGF14,DAB1,SYT1,RTN4,MDGA2,CNTNAP2,GRIK1,CTNND2,ADGRB3	In_3/3_down
GO:BP	vascular process in circulatory system	GO:0003018	0.000408011	3.38933	269	172	12	18017	SLC1A3,APOE,ABCA2,DOCK5,SLC1A2,SLC44A1,CHRM3,SLCO3A1,TJP1,ATP8A1,ASIC2,DOCK4	In_3/3_up		GO:BP	positive regulation of calcium ion transmembrane transporter activity	GO:1901021	0.00142726	2.8455	39	29	3	18017	CALM1,ATP1B1,FGF14	In_3/3_down
GO:BP	cell-cell adhesion	GO:0098609	0.000438357	3.35817	884	172	23	18017	DOCK8,ADGRV1,CDH20,CLDN11,MBP,TNR,ALCAM,DLG1,GRID2,CTNNA3,DSCAM,PTK2,ACTB,PRNP,PCDH7,TJP1,NCAM2,CDH12,PCDH15,THY1,PCDH9,CADM1,ROBO1	In_3/3_up		GO:BP	positive regulation of transporter activity	GO:0032411	0.00147823	2.83026	117	29	4	18017	CALM1,ATP1B1,TMSB4X,FGF14	In_3/3_down
GO:BP	regulation of cell communication	GO:0010646	0.000439125	3.35741	3659	172	59	18017	MTRNR2L8,MTRNR2L12,SPP1,TF,ARHGAP24,LAMA2,ARAP2,SLC1A3,APOE,GRIN1,GAB1,GRM3,ST18,ADGRV1,PIP4K2A,NRGN,RNF220,ARHGAP21,HIP1,MAML2,GPC5,NEFL,NRG1,ITPR2,RELN,LDLRAD4,TNR,PHLPP1,CLU,PSD3,CHST11,DLG1,APLP1,GRID2,MAP4K4,DLC1,PEX5L,YWHAH,DCC,PTK2,PLCL1,CAMK2B,PDE8A,PRNP,GRM7,FAIM2,PRKCB,ERBB4,PSAP,CACNB2,THY1,ARHGAP26,OTUD7A,HDAC9,PPP3CA,CADM1,DGKB,ROBO1,NDRG4	In_3/3_up		GO:BP	developmental growth involved in morphogenesis	GO:0060560	0.00156005	2.80686	242	29	5	18017	AUTS2,HSP90AA1,MAGI2,SYT1,RTN4	In_3/3_down
GO:BP	negative regulation of neuron differentiation	GO:0045665	0.000463236	3.3342	229	172	11	18017	LINGO1,SPP1,APOE,TNR,B2M,MAP4K4,YWHAH,DCC,PTK2,THY1,PPP3CA	In_3/3_up		GO:BP	behavior	GO:0007610	0.00157922	2.80156	615	29	7	18017	AHI1,NRXN3,FGF12,DAB1,CNTNAP2,GRIK2,ADGRB3	In_3/3_down
GO:BP	cellular developmental process	GO:0048869	0.000466471	3.33118	4468	172	68	18017	SLC26A3,DHFR,LINGO1,SPP1,TF,ENC1,ARHGAP24,LAMA2,PLP1,SLC1A3,CNP,APOE,GRIN1,GAB1,ADGRV1,ABCA2,DOCK5,PIP4K2A,PTPRK,HIP1,MAN2A1,CLMN,NEFL,NRG1,RELN,LDLRAD4,TNR,CLU,SH3GL3,ALCAM,ZSWIM6,CHST11,B2M,MEF2A,GRID2,MAP4K4,DOCK10,FRYL,DSCAM,YWHAH,DCC,SHTN1,PTK2,CAMK2B,ACTB,MBNL1,GPM6B,TJP1,FAIM2,PRKCB,UNC5C,ERBB4,NCAM2,PSAP,PCDH15,THY1,HDAC9,TTLL7,SGCZ,TMEFF2,PPP3CA,QKI,NTM,SGK1,CADM1,ROBO1,CSMD3,NDRG4	In_3/3_up		GO:BP	cell morphogenesis involved in neuron differentiation	GO:0048667	0.00157922	2.80156	615	29	7	18017	NRXN3,AUTS2,HSP90AA1,DAB1,RTN4,CTNND2,ADGRB3	In_3/3_down
GO:BP	negative regulation of neuron projection regeneration	GO:0070571	0.000469931	3.32797	16	172	4	18017	SPP1,TNR,MAP4K4,THY1	In_3/3_up		GO:BP	cell surface receptor signaling pathway	GO:0007166	0.00157922	2.80156	3250	29	15	18017	AHI1,CALM1,HSP90AA1,MAGI2,RORA,FGF12,TMSB4X,ANKS1B,DLG2,DAB1,RTN4,GRIK2,GRIK1,CTNND2,ADGRB3	In_3/3_down
GO:BP	cell-cell adhesion via plasma-membrane adhesion molecules	GO:0098742	0.000475734	3.32264	275	172	12	18017	CDH20,CLDN11,MBP,ALCAM,GRID2,DSCAM,PCDH7,CDH12,PCDH15,PCDH9,CADM1,ROBO1	In_3/3_up		GO:BP	signal transduction	GO:0007165	0.00157922	2.80156	6291	29	21	18017	AHI1,SPARCL1,CALM1,ATP1B1,NRXN3,AUTS2,HSP90AA1,MAGI2,RORA,FGF12,TMSB4X,FGF14,ANKS1B,DLG2,DAB1,RTN4,PEBP1,GRIK2,GRIK1,CTNND2,ADGRB3	In_3/3_down
GO:BP	regulation of multicellular organismal development	GO:2000026	0.000478151	3.32044	2262	172	42	18017	LINGO1,SPP1,ENC1,LAMA2,CBLN2,APOE,GRIN1,GAB1,ADGRV1,MAN2A1,NEFL,NRG1,LINGO2,RELN,LDLRAD4,MBP,TNR,PHLPP1,SH3GL3,ZSWIM6,DLG1,B2M,GRID2,MAP4K4,DSCAM,YWHAH,DCC,SHTN1,PTK2,CAMK2B,GPM6B,TJP1,PRKCB,ERBB4,ASIC2,THY1,HDAC9,PKM,PPP3CA,ROBO1,CSMD3,NDRG4	In_3/3_up		GO:BP	synapse organization	GO:0050808	0.0016287	2.78816	417	29	6	18017	NRXN3,MAGI2,DLG2,GPHN,CTNND2,ADGRB3	In_3/3_down
GO:BP	positive regulation of cellular component organization	GO:0051130	0.000486757	3.31269	1226	172	28	18017	TF,ENC1,CBLN2,APOE,PIP4K2A,HIP1,NEFL,NRG1,LINGO2,RELN,CLU,DLG1,B2M,GRID2,MAP4K4,DSCAM,YWHAH,SHTN1,CAMK2B,ATP8A1,PRKCB,FCHSD2,ASIC2,THY1,BCAS3,PPP3CA,ROBO1,NDRG4	In_3/3_up		GO:BP	modulation of chemical synaptic transmission	GO:0050804	0.00164612	2.78354	420	29	6	18017	CALM1,NRXN3,FGF14,SYT1,GRIK2,GRIK1	In_3/3_down
GO:BP	focal adhesion assembly	GO:0048041	0.000529536	3.2761	84	172	7	18017	PTPRK,MAP4K4,DLC1,PTK2,GPM6B,THY1,BCAS3	In_3/3_up		GO:BP	regulation of trans-synaptic signaling	GO:0099177	0.00164612	2.78354	421	29	6	18017	CALM1,NRXN3,FGF14,SYT1,GRIK2,GRIK1	In_3/3_down
GO:BP	negative regulation of nervous system development	GO:0051961	0.000555575	3.25526	328	172	13	18017	LINGO1,SPP1,APOE,NRG1,TNR,B2M,MAP4K4,YWHAH,DCC,PTK2,ERBB4,THY1,PPP3CA	In_3/3_up		GO:BP	protein localization to membrane	GO:0072657	0.0020289	2.69274	649	29	7	18017	CALM1,ATP1B1,HSP90AA1,MAGI2,DLG2,GPHN,GRIK2	In_3/3_down
GO:BP	postsynaptic modulation of chemical synaptic transmission	GO:0099170	0.000557647	3.25364	6	172	3	18017	NRGN,DCC,PPP3CA	In_3/3_up		GO:BP	cell-cell signaling	GO:0007267	0.00208012	2.68191	1806	29	11	18017	DLGAP1,CALM1,NRXN3,MAGI2,FGF12,FGF14,DLG2,SYT1,GRIK2,GRIK1,CTNND2	In_3/3_down
GO:BP	regulation of signaling	GO:0023051	0.000562941	3.24954	3699	172	59	18017	MTRNR2L8,MTRNR2L12,SPP1,TF,ARHGAP24,LAMA2,ARAP2,SLC1A3,APOE,GRIN1,GAB1,GRM3,ST18,ADGRV1,PIP4K2A,NRGN,RNF220,ARHGAP21,HIP1,MAML2,GPC5,NEFL,NRG1,ITPR2,RELN,LDLRAD4,TNR,PHLPP1,CLU,PSD3,CHST11,DLG1,APLP1,GRID2,MAP4K4,DLC1,PEX5L,YWHAH,DCC,PTK2,PLCL1,CAMK2B,PDE8A,PRNP,GRM7,FAIM2,PRKCB,ERBB4,PSAP,CACNB2,THY1,ARHGAP26,OTUD7A,HDAC9,PPP3CA,CADM1,DGKB,ROBO1,NDRG4	In_3/3_up		GO:BP	ion transmembrane transport	GO:0034220	0.00211791	2.67409	1179	29	9	18017	CALM1,ATP1B1,FGF12,TMSB4X,FGF14,DLG2,FAM155A,GRIK2,GRIK1	In_3/3_down
GO:BP	postsynapse organization	GO:0099173	0.000595772	3.22492	155	172	9	18017	APOE,NEFL,RELN,DLG1,GRID2,DOCK10,CAMK2B,ACTB,PRNP	In_3/3_up		GO:BP	receptor localization to synapse	GO:0097120	0.0022443	2.64892	50	29	3	18017	ANKS1B,DLG2,GPHN	In_3/3_down
GO:BP	transport across blood-brain barrier	GO:0150104	0.000637716	3.19537	87	172	7	18017	SLC1A3,APOE,ABCA2,SLC1A2,SLC44A1,SLCO3A1,ATP8A1	In_3/3_up		GO:BP	adult behavior	GO:0030534	0.00237613	2.62413	142	29	4	18017	NRXN3,FGF12,DAB1,CNTNAP2	In_3/3_down
GO:BP	vascular transport	GO:0010232	0.000681336	3.16664	88	172	7	18017	SLC1A3,APOE,ABCA2,SLC1A2,SLC44A1,SLCO3A1,ATP8A1	In_3/3_up		GO:BP	membrane organization	GO:0061024	0.00281463	2.55058	948	29	8	18017	CALM1,ATP1B1,HSP90AA1,MAGI2,SYT1,RTN4,GPHN,CNTNAP2	In_3/3_down
GO:BP	sensory perception of sound	GO:0007605	0.000704812	3.15193	159	172	9	18017	SLC1A3,ADGRV1,MBP,LHFPL3,GRM7,TJP1,PSAP,ASIC2,PCDH15	In_3/3_up		GO:BP	positive regulation of cation transmembrane transport	GO:1904064	0.00290609	2.53669	151	29	4	18017	CALM1,ATP1B1,TMSB4X,FGF14	In_3/3_down
GO:BP	long-term memory	GO:0007616	0.000704812	3.15193	36	172	5	18017	APOE,GRIN1,RELN,PRNP,SGK1	In_3/3_up		GO:BP	positive regulation of transport	GO:0051050	0.00298583	2.52494	961	29	8	18017	AHI1,CALM1,ATP1B1,MAGI2,FGF12,TMSB4X,FGF14,SYT1	In_3/3_down
GO:BP	neuron projection regeneration	GO:0031102	0.000781253	3.10721	61	172	6	18017	DHFR,SPP1,NEFL,TNR,MAP4K4,THY1	In_3/3_up		GO:BP	postsynapse organization	GO:0099173	0.00310269	2.50826	155	29	4	18017	MAGI2,DLG2,GPHN,CTNND2	In_3/3_down
GO:BP	regulation of transporter activity	GO:0032409	0.000821079	3.08562	294	172	12	18017	GRIN1,NEFL,PDE4B,RELN,CACNA2D1,DLG1,CHRM3,YWHAH,ACTB,PRNP,CACNB2,SGK1	In_3/3_up		GO:BP	regulation of ion transmembrane transport	GO:0034765	0.00340742	2.46757	498	29	6	18017	CALM1,ATP1B1,FGF12,TMSB4X,FGF14,DLG2	In_3/3_down
GO:BP	amyloid fibril formation	GO:1990000	0.00085631	3.06737	19	172	4	18017	APOE,CRYAB,CLU,B2M	In_3/3_up		GO:BP	regulation of ion transport	GO:0043269	0.00340742	2.46757	726	29	7	18017	CALM1,ATP1B1,FGF12,TMSB4X,FGF14,DLG2,SYT1	In_3/3_down
GO:BP	regulation of focal adhesion assembly	GO:0051893	0.00090788	3.04197	63	172	6	18017	MAP4K4,DLC1,PTK2,GPM6B,THY1,BCAS3	In_3/3_up		GO:BP	anatomical structure development	GO:0048856	0.00363112	2.43996	6143	29	20	18017	RBFOX1,AHI1,SPARCL1,CALM1,NRXN3,AUTS2,HSP90AA1,MAGI2,RORA,FGF12,KAZN,FGF14,DAB1,SYT1,RTN4,MDGA2,CNTNAP2,GRIK1,CTNND2,ADGRB3	In_3/3_down
GO:BP	dendrite development	GO:0016358	0.00090788	3.04197	251	172	11	18017	APOE,GRIN1,RELN,MEF2A,DOCK10,DSCAM,YWHAH,DCC,CAMK2B,PPP3CA,CSMD3	In_3/3_up		GO:BP	positive regulation of ion transmembrane transport	GO:0034767	0.00363112	2.43996	165	29	4	18017	CALM1,ATP1B1,TMSB4X,FGF14	In_3/3_down
GO:BP	regulation of cell-substrate junction assembly	GO:0090109	0.00090788	3.04197	63	172	6	18017	MAP4K4,DLC1,PTK2,GPM6B,THY1,BCAS3	In_3/3_up		GO:BP	multicellular organismal process	GO:0032501	0.00363112	2.43996	7992	29	23	18017	RBFOX1,AHI1,CALM1,ATP1B1,NRXN3,AUTS2,HSP90AA1,MAGI2,RORA,FGF12,TMSB4X,KAZN,FGF14,DLG2,DAB1,SYT1,RTN4,MDGA2,CNTNAP2,GRIK2,GRIK1,CTNND2,ADGRB3	In_3/3_down
GO:BP	regulation of molecular function	GO:0065009	0.000954604	3.02018	3084	172	51	18017	DHFR,MTRNR2L8,MTRNR2L12,TF,ARHGAP24,DOCK8,ARAP2,APOE,GRIN1,GRM3,ST18,ADGRV1,ABCA2,DOCK5,ARHGAP21,HIP1,NEFL,NRG1,PDE4B,CRYAB,RELN,MBP,CLU,CACNA2D1,DLG1,B2M,MAP4K4,DLC1,CHRM3,DOCK10,YWHAH,SLCO3A1,AGAP1,PTK2,PLCL1,ACTB,PRNP,GRM7,PRKCB,ERBB4,PSAP,CACNB2,DOCK4,THY1,ARHGAP26,HDAC9,BCAS3,PPP3CA,SGK1,ROBO1,DYNLL1	In_3/3_up		GO:BP	regulation of synaptic vesicle exocytosis	GO:2000300	0.00385428	2.41406	64	29	3	18017	CALM1,NRXN3,SYT1	In_3/3_down
GO:BP	neural nucleus development	GO:0048857	0.000972578	3.01208	64	172	6	18017	PLP1,CNP,MBP,YWHAH,ACTB,DYNLL1	In_3/3_up		GO:BP	cellular protein localization	GO:0034613	0.00385428	2.41406	1985	29	11	18017	AHI1,CALM1,ATP1B1,HSP90AA1,MAGI2,TMSB4X,DLG2,RTN4,GPHN,CNTNAP2,GRIK2	In_3/3_down
GO:BP	negative regulation of cell development	GO:0010721	0.000976441	3.01035	351	172	13	18017	LINGO1,SPP1,APOE,NRG1,TNR,B2M,MAP4K4,YWHAH,DCC,PTK2,ERBB4,THY1,PPP3CA	In_3/3_up		GO:BP	cellular macromolecule localization	GO:0070727	0.00392877	2.40574	1996	29	11	18017	AHI1,CALM1,ATP1B1,HSP90AA1,MAGI2,TMSB4X,DLG2,RTN4,GPHN,CNTNAP2,GRIK2	In_3/3_down
GO:BP	locomotory behavior	GO:0007626	0.000976441	3.01035	209	172	10	18017	CNP,APOE,GRIN1,ABCA2,NRG1,RELN,TNR,DSCAM,PSAP,PCDH15	In_3/3_up		GO:BP	multicellular organism development	GO:0007275	0.00392877	2.40574	5638	29	19	18017	RBFOX1,AHI1,CALM1,NRXN3,AUTS2,HSP90AA1,MAGI2,RORA,FGF12,KAZN,FGF14,DAB1,SYT1,RTN4,MDGA2,CNTNAP2,GRIK1,CTNND2,ADGRB3	In_3/3_down
GO:BP	regulation of anatomical structure morphogenesis	GO:0022603	0.00100588	2.99745	1218	172	27	18017	LINGO1,SPP1,APOE,GRIN1,GAB1,DOCK5,NEFL,RELN,MBP,TNR,ZSWIM6,DLG1,DLC1,DSCAM,YWHAH,DCC,SHTN1,PTK2,CAMK2B,TJP1,PRKCB,THY1,HDAC9,FMNL2,PKM,PPP3CA,ROBO1	In_3/3_up		GO:BP	cell morphogenesis involved in differentiation	GO:0000904	0.00406136	2.39133	764	29	7	18017	NRXN3,AUTS2,HSP90AA1,DAB1,RTN4,CTNND2,ADGRB3	In_3/3_down
GO:BP	regulation of blood circulation	GO:1903522	0.0011116	2.95405	306	172	12	18017	DOCK5,ITPR2,PDE4B,CACNA2D1,DLG1,MEF2A,CTNNA3,CHRM3,CACNA2D3,ASIC2,CACNB2,DOCK4	In_3/3_up		GO:BP	neuron projection extension	GO:1990138	0.00406136	2.39133	174	29	4	18017	AUTS2,HSP90AA1,SYT1,RTN4	In_3/3_down
GO:BP	intracellular signal transduction	GO:0035556	0.0011116	2.95405	2854	172	48	18017	RASGEF1B,TF,ARHGAP24,DOCK8,ARAP2,APOE,GRIN1,GAB1,ADGRV1,DOCK5,PIP4K2A,ARHGAP21,HIP1,NEFL,NRG1,ITPR2,CRYAB,RELN,MBP,PHLPP1,CLU,PSD3,DLG1,MEF2A,ELMO1,APLP1,MAP4K4,DLC1,CHRM3,DOCK10,PEX5L,SHTN1,PTK2,PLCL1,PDE8A,PRNP,TJP1,PRKCB,ERBB4,PSAP,DOCK4,ARHGAP26,OTUD7A,PPP3CA,SGK1,DGKB,ROBO1,NDRG4	In_3/3_up		GO:BP	brain development	GO:0007420	0.00459608	2.33761	784	29	7	18017	AHI1,CALM1,RORA,DAB1,SYT1,RTN4,CNTNAP2	In_3/3_down
GO:BP	regulation of synapse organization	GO:0050807	0.00114887	2.93973	214	172	10	18017	CBLN2,APOE,GRIN1,LINGO2,RELN,GRID2,PTK2,CAMK2B,PRNP,ASIC2	In_3/3_up		GO:BP	detection of calcium ion	GO:0005513	0.00459608	2.33761	13	29	2	18017	CALM1,SYT1	In_3/3_down
GO:BP	positive regulation of synaptic transmission	GO:0050806	0.00116062	2.93531	172	172	9	18017	LAMA2,SLC1A3,APOE,GRIN1,NRGN,RELN,TNR,PRNP,CACNB2	In_3/3_up		GO:BP	positive regulation of calcium ion transmembrane transport	GO:1904427	0.00459608	2.33761	72	29	3	18017	CALM1,ATP1B1,FGF14	In_3/3_down
GO:BP	regulation of cell-substrate junction organization	GO:0150116	0.0011883	2.92507	67	172	6	18017	MAP4K4,DLC1,PTK2,GPM6B,THY1,BCAS3	In_3/3_up		GO:BP	regulation of synaptic transmission, glutamatergic	GO:0051966	0.00459608	2.33761	72	29	3	18017	SYT1,GRIK2,GRIK1	In_3/3_down
GO:BP	positive regulation of transport	GO:0051050	0.00122677	2.91124	961	172	23	18017	SPP1,TF,APOE,GRIN1,SLC1A2,HIP1,RELN,CLU,CACNA2D1,DLG1,B2M,MEF2A,YWHAH,ACTB,PRNP,ATP8A1,PRKCB,CACNB2,THY1,BCAS3,PPP3CA,SGK1,CADM1	In_3/3_up		GO:BP	intracellular signal transduction	GO:0035556	0.00459608	2.33761	2854	29	13	18017	CALM1,ATP1B1,AUTS2,HSP90AA1,MAGI2,RORA,TMSB4X,DLG2,DAB1,RTN4,PEBP1,GRIK2,ADGRB3	In_3/3_down
GO:BP	regulation of amyloid fibril formation	GO:1905906	0.00126585	2.89762	8	172	3	18017	APOE,CRYAB,CLU	In_3/3_up		GO:BP	regulation of vesicle-mediated transport	GO:0060627	0.00459608	2.33761	545	29	6	18017	AHI1,CALM1,NRXN3,MAGI2,FGF14,SYT1	In_3/3_down
GO:BP	cell-substrate junction assembly	GO:0007044	0.00131996	2.87944	100	172	7	18017	PTPRK,MAP4K4,DLC1,PTK2,GPM6B,THY1,BCAS3	In_3/3_up		GO:BP	synaptic vesicle recycling	GO:0036465	0.00459608	2.33761	71	29	3	18017	CALM1,FGF14,SYT1	In_3/3_down
GO:BP	positive regulation of hydrolase activity	GO:0051345	0.00139468	2.85553	775	172	20	18017	ARHGAP24,DOCK8,ARAP2,GRIN1,ST18,DOCK5,ARHGAP21,HIP1,MBP,MAP4K4,DLC1,DOCK10,AGAP1,PSAP,DOCK4,THY1,ARHGAP26,BCAS3,ROBO1,DYNLL1	In_3/3_up		GO:BP	transmission of nerve impulse	GO:0019226	0.00459608	2.33761	72	29	3	18017	FGF12,CNTNAP2,GRIK2	In_3/3_down
GO:BP	actin cytoskeleton organization	GO:0030036	0.00139468	2.85553	712	172	19	18017	TF,GAB1,HIP1,TMSB10,DLG1,MEF2A,ELMO1,DLC1,SHTN1,ACTB,GPM6B,TJP1,FCHSD2,PCDH15,ARHGAP26,SSH2,FMNL2,BCAS3,TMEFF2	In_3/3_up		GO:BP	localization	GO:0051179	0.00459608	2.33761	6920	29	21	18017	RBFOX1,AHI1,CALM1,ATP1B1,NRXN3,AUTS2,HSP90AA1,MAGI2,FGF12,TMSB4X,FGF14,ANKS1B,DLG2,DAB1,FAM155A,SYT1,RTN4,GPHN,CNTNAP2,GRIK2,GRIK1	In_3/3_down
GO:BP	negative regulation of axonogenesis	GO:0050771	0.00145899	2.83595	70	172	6	18017	LINGO1,SPP1,TNR,DCC,PTK2,THY1	In_3/3_up		GO:BP	ion transport	GO:0006811	0.00503605	2.29791	1730	29	10	18017	CALM1,ATP1B1,FGF12,TMSB4X,FGF14,DLG2,FAM155A,SYT1,GRIK2,GRIK1	In_3/3_down
GO:BP	regulation of receptor-mediated endocytosis	GO:0048259	0.00154776	2.8103	103	172	7	18017	TF,ABCA2,HIP1,CLU,SH3GL3,B2M,DNAJC6	In_3/3_up		GO:BP	positive regulation of cation channel activity	GO:2001259	0.00515166	2.28805	76	29	3	18017	CALM1,TMSB4X,FGF14	In_3/3_down
GO:BP	sensory perception of mechanical stimulus	GO:0050954	0.00154776	2.8103	180	172	9	18017	SLC1A3,ADGRV1,MBP,LHFPL3,GRM7,TJP1,PSAP,ASIC2,PCDH15	In_3/3_up		GO:BP	protein localization to synapse	GO:0035418	0.00549336	2.26016	78	29	3	18017	ANKS1B,DLG2,GPHN	In_3/3_down
GO:BP	positive regulation of catalytic activity	GO:0043085	0.00157448	2.80286	1475	172	30	18017	DHFR,TF,ARHGAP24,DOCK8,ARAP2,APOE,GRIN1,ST18,DOCK5,ARHGAP21,HIP1,NRG1,RELN,MBP,CLU,DLG1,MAP4K4,DLC1,DOCK10,AGAP1,PTK2,PRNP,ERBB4,PSAP,DOCK4,THY1,ARHGAP26,BCAS3,ROBO1,DYNLL1	In_3/3_up		GO:BP	head development	GO:0060322	0.00563256	2.24929	829	29	7	18017	AHI1,CALM1,RORA,DAB1,SYT1,RTN4,CNTNAP2	In_3/3_down
GO:BP	regulation of synapse structure or activity	GO:0050803	0.00160507	2.79451	225	172	10	18017	CBLN2,APOE,GRIN1,LINGO2,RELN,GRID2,PTK2,CAMK2B,PRNP,ASIC2	In_3/3_up		GO:BP	regulation of high voltage-gated calcium channel activity	GO:1901841	0.00598694	2.2228	16	29	2	18017	CALM1,FGF14	In_3/3_down
GO:BP	myelination	GO:0042552	0.00162173	2.79002	141	172	8	18017	PLP1,ABCA2,NRG1,MBP,CLU,DLG1,PSAP,QKI	In_3/3_up		GO:BP	regulation of transmembrane transport	GO:0034762	0.00598694	2.2228	589	29	6	18017	CALM1,ATP1B1,FGF12,TMSB4X,FGF14,DLG2	In_3/3_down
GO:BP	synapse assembly	GO:0007416	0.00163601	2.78621	182	172	9	18017	CBLN2,GRIN1,NRG1,LINGO2,GRID2,DSCAM,PTK2,ERBB4,ASIC2	In_3/3_up		GO:BP	maintenance of synapse structure	GO:0099558	0.00666719	2.17606	17	29	2	18017	DLG2,ADGRB3	In_3/3_down
GO:BP	cytoskeleton organization	GO:0007010	0.00163601	2.78621	1407	172	29	18017	TF,C10ORF90,CNP,APOE,GAB1,HIP1,NCKAP5,NEFL,TMSB10,CRYAB,DLG1,MEF2A,ELMO1,IQCJ-SCHIP1,DLC1,SHTN1,PTK2,ACTB,GPM6B,TJP1,FCHSD2,PCDH15,THY1,ARHGAP26,SSH2,FMNL2,TTLL7,BCAS3,TMEFF2	In_3/3_up		GO:BP	cellular response to stimulus	GO:0051716	0.00701245	2.15413	7777	29	22	18017	AHI1,SPARCL1,CALM1,ATP1B1,NRXN3,AUTS2,HSP90AA1,MAGI2,RORA,FGF12,TMSB4X,FGF14,ANKS1B,DLG2,DAB1,SYT1,RTN4,PEBP1,GRIK2,GRIK1,CTNND2,ADGRB3	In_3/3_down
GO:BP	cell-substrate junction organization	GO:0150115	0.00166846	2.77769	105	172	7	18017	PTPRK,MAP4K4,DLC1,PTK2,GPM6B,THY1,BCAS3	In_3/3_up		GO:BP	positive regulation of transmembrane transport	GO:0034764	0.0073281	2.13501	216	29	4	18017	CALM1,ATP1B1,TMSB4X,FGF14	In_3/3_down
GO:BP	regulation of vascular associated smooth muscle contraction	GO:0003056	0.00170829	2.76744	9	172	3	18017	DOCK5,CHRM3,DOCK4	In_3/3_up		GO:BP	regulation of calcium ion transmembrane transporter activity	GO:1901019	0.00795396	2.09942	91	29	3	18017	CALM1,ATP1B1,FGF14	In_3/3_down
GO:BP	supramolecular fiber organization	GO:0097435	0.00170829	2.76744	727	172	19	18017	TF,APOE,HIP1,NCKAP5,NEFL,TMSB10,CRYAB,CLU,DLG1,B2M,MEF2A,ELMO1,DLC1,SHTN1,TJP1,FCHSD2,PCDH15,SSH2,TMEFF2	In_3/3_up		GO:BP	cell development	GO:0048468	0.0081115	2.0909	2237	29	11	18017	AHI1,NRXN3,AUTS2,HSP90AA1,MAGI2,DAB1,SYT1,RTN4,CNTNAP2,CTNND2,ADGRB3	In_3/3_down
GO:BP	positive regulation of locomotion	GO:0040017	0.00176913	2.75224	606	172	17	18017	TF,DOCK8,GAB1,DOCK5,RELN,MAP4K4,DSCAM,SHTN1,PTK2,TJP1,ATP8A1,DOCK4,THY1,SSH2,HDAC9,BCAS3,PPP3CA	In_3/3_up		GO:BP	cation transmembrane transport	GO:0098655	0.0081115	2.0909	894	29	7	18017	CALM1,ATP1B1,FGF12,TMSB4X,FGF14,DLG2,FAM155A	In_3/3_down
GO:BP	regulation of transmembrane transporter activity	GO:0022898	0.00192469	2.71564	279	172	11	18017	GRIN1,NEFL,PDE4B,RELN,CACNA2D1,DLG1,CHRM3,YWHAH,ACTB,PRNP,CACNB2	In_3/3_up		GO:BP	regulation of neurotransmitter secretion	GO:0046928	0.00819521	2.08644	93	29	3	18017	CALM1,NRXN3,SYT1	In_3/3_down
GO:BP	positive regulation of cellular component movement	GO:0051272	0.00193001	2.71444	611	172	17	18017	TF,DOCK8,GAB1,DOCK5,RELN,MAP4K4,DSCAM,SHTN1,PTK2,TJP1,ATP8A1,DOCK4,THY1,SSH2,HDAC9,BCAS3,PPP3CA	In_3/3_up		GO:BP	cation transport	GO:0006812	0.0083035	2.08074	1197	29	8	18017	CALM1,ATP1B1,FGF12,TMSB4X,FGF14,DLG2,FAM155A,SYT1	In_3/3_down
GO:BP	biological regulation	GO:0065007	0.00211946	2.67377	12697	172	143	18017	RASGEF1B,SLC26A3,DHFR,MTRNR2L8,MTRNR2L12,LINGO1,SPP1,TF,ENC1,ARHGAP24,DOCK8,LAMA2,PLP1,PTGDS,TSHZ2,ARAP2,SLC1A3,APBB1IP,CNDP1,CBLN2,C10ORF90,CNP,APOE,GRIN1,GAB1,KCNH8,GRM3,ST18,ADGRV1,ABCA2,DOCK5,PIP4K2A,NRGN,SLC1A2,RNF220,CREB5,PTPRK,ARHGAP21,HIP1,MAN2A1,CLMN,TMEM165,NFIA,MAML2,GPC5,NEFL,POLR2F,NRG1,LINGO2,ITPR2,TMSB10,PDE1A,ZNF91,PDE4B,CRYAB,RELN,LDLRAD4,MBP,TNR,PDE1C,PHLPP1,CLU,SH3GL3,ZBTB20,A…	In_3/3_up		GO:BP	regulation of transport	GO:0051049	0.00866887	2.06204	1887	29	10	18017	AHI1,CALM1,ATP1B1,NRXN3,MAGI2,FGF12,TMSB4X,FGF14,DLG2,SYT1	In_3/3_down
GO:BP	regulation of ion transmembrane transport	GO:0034765	0.00213437	2.67073	498	172	15	18017	GRIN1,KCNH8,NEFL,PDE4B,RELN,CACNA2D1,DLG1,CHRM3,CACNA2D3,YWHAH,PRNP,ASIC2,CACNB2,THY1,KCNQ5	In_3/3_up		GO:BP	developmental process	GO:0032502	0.0086706	2.06195	6676	29	20	18017	RBFOX1,AHI1,SPARCL1,CALM1,NRXN3,AUTS2,HSP90AA1,MAGI2,RORA,FGF12,KAZN,FGF14,DAB1,SYT1,RTN4,MDGA2,CNTNAP2,GRIK1,CTNND2,ADGRB3	In_3/3_down
GO:BP	axon guidance	GO:0007411	0.00232191	2.63415	286	172	11	18017	LAMA2,GAB1,RELN,TNR,ALCAM,ZSWIM6,DSCAM,DCC,PTK2,UNC5C,ROBO1	In_3/3_up		GO:BP	synaptic transmission, glutamatergic	GO:0035249	0.00887672	2.05175	97	29	3	18017	SYT1,GRIK2,GRIK1	In_3/3_down
GO:BP	dendrite morphogenesis	GO:0048813	0.00232191	2.63415	150	172	8	18017	GRIN1,RELN,MEF2A,DOCK10,DSCAM,YWHAH,CAMK2B,PPP3CA	In_3/3_up		GO:BP	positive regulation of phosphoprotein phosphatase activity	GO:0032516	0.00897216	2.0471	21	29	2	18017	CALM1,MAGI2	In_3/3_down
GO:BP	neuromuscular process	GO:0050905	0.00235149	2.62866	112	172	7	18017	SLC1A3,GRIN1,NEFL,TNR,GRID2,PSAP,PCDH15	In_3/3_up		GO:BP	vocalization behavior	GO:0071625	0.00897216	2.0471	21	29	2	18017	NRXN3,CNTNAP2	In_3/3_down
GO:BP	neuron projection guidance	GO:0097485	0.00236445	2.62627	287	172	11	18017	LAMA2,GAB1,RELN,TNR,ALCAM,ZSWIM6,DSCAM,DCC,PTK2,UNC5C,ROBO1	In_3/3_up		GO:BP	developmental cell growth	GO:0048588	0.00982153	2.00782	241	29	4	18017	AUTS2,HSP90AA1,SYT1,RTN4	In_3/3_down
GO:BP	blood circulation	GO:0008015	0.00246085	2.60892	565	172	16	18017	APOE,DOCK5,ITPR2,PDE4B,CACNA2D1,DLG1,MEF2A,CTNNA3,CHRM3,CACNA2D3,TJP1,ASIC2,CACNB2,DOCK4,SGCZ,SGK1	In_3/3_up		GO:CC	cell junction	GO:0030054	1.87676e-09	8.72659	2058	30	19	18956	AHI1,DLGAP1,CALM1,ATP1B1,NRXN3,MAGI2,FGF12,KAZN,ANKS1B,DLG2,DAB1,SYT1,RTN4,GPHN,CNTNAP2,GRIK2,GRIK1,CTNND2,ADGRB3	In_3/3_down
GO:BP	regulation of synaptic plasticity	GO:0048167	0.00262168	2.58142	196	172	9	18017	APOE,GRIN1,NRGN,RELN,TNR,GRID2,YWHAH,CAMK2B,PRNP	In_3/3_up		GO:CC	synapse	GO:0045202	2.2093e-08	7.65575	1293	30	15	18956	DLGAP1,CALM1,NRXN3,MAGI2,FGF12,ANKS1B,DLG2,DAB1,SYT1,RTN4,GPHN,GRIK2,GRIK1,CTNND2,ADGRB3	In_3/3_down
GO:BP	regulation of dendrite development	GO:0050773	0.00307672	2.51191	157	172	8	18017	APOE,GRIN1,RELN,YWHAH,DCC,CAMK2B,PPP3CA,CSMD3	In_3/3_up		GO:CC	postsynaptic density	GO:0014069	4.12082e-08	7.38502	305	30	9	18956	DLGAP1,MAGI2,ANKS1B,DLG2,DAB1,RTN4,GPHN,GRIK2,CTNND2	In_3/3_down
GO:BP	central nervous system neuron differentiation	GO:0021953	0.00323352	2.49032	202	172	9	18017	ZSWIM6,B2M,GRID2,DCC,PTK2,FAIM2,ERBB4,PSAP,ROBO1	In_3/3_up		GO:CC	postsynapse	GO:0098794	4.12082e-08	7.38502	591	30	11	18956	DLGAP1,MAGI2,ANKS1B,DLG2,DAB1,RTN4,GPHN,GRIK2,GRIK1,CTNND2,ADGRB3	In_3/3_down
GO:BP	regulation of developmental process	GO:0050793	0.00323352	2.49032	2833	172	46	18017	LINGO1,SPP1,ENC1,LAMA2,CBLN2,APOE,GRIN1,GAB1,ADGRV1,DOCK5,MAN2A1,NEFL,NRG1,LINGO2,RELN,LDLRAD4,MBP,TNR,PHLPP1,SH3GL3,ZSWIM6,DLG1,B2M,MEF2A,GRID2,MAP4K4,DLC1,DSCAM,YWHAH,DCC,SHTN1,PTK2,CAMK2B,GPM6B,TJP1,PRKCB,ERBB4,ASIC2,THY1,HDAC9,FMNL2,PKM,PPP3CA,ROBO1,CSMD3,NDRG4	In_3/3_up		GO:CC	asymmetric synapse	GO:0032279	4.12082e-08	7.38502	311	30	9	18956	DLGAP1,MAGI2,ANKS1B,DLG2,DAB1,RTN4,GPHN,GRIK2,CTNND2	In_3/3_down
GO:BP	apoptotic process	GO:0006915	0.003238	2.48972	2013	172	36	18017	MTRNR2L8,MTRNR2L12,SLC5A11,DOCK8,APOE,GRIN1,ST18,HIP1,NEFL,PDE1A,CRYAB,PRUNE2,PHLPP1,CLU,CHST11,MEF2A,ELMO1,APLP1,GRID2,MAP4K4,DLC1,YWHAH,DCC,PTK2,PRNP,FAIM2,PRKCB,UNC5C,PTMA,TRIM2,ERBB4,ASIC2,SGK1,CADM1,ROBO1,DYNLL1	In_3/3_up		GO:CC	postsynaptic specialization	GO:0099572	4.82705e-08	7.31632	328	30	9	18956	DLGAP1,MAGI2,ANKS1B,DLG2,DAB1,RTN4,GPHN,GRIK2,CTNND2	In_3/3_down
GO:BP	forebrain development	GO:0030900	0.00341168	2.46703	408	172	13	18017	CNP,GRIN1,NRGN,SLC1A2,NEFL,NRG1,RELN,TNR,ZSWIM6,B2M,DLC1,ERBB4,ROBO1	In_3/3_up		GO:CC	neuron to neuron synapse	GO:0098984	4.82705e-08	7.31632	329	30	9	18956	DLGAP1,MAGI2,ANKS1B,DLG2,DAB1,RTN4,GPHN,GRIK2,CTNND2	In_3/3_down
GO:BP	negative regulation of supramolecular fiber organization	GO:1902904	0.00341168	2.46703	160	172	8	18017	APOE,TMSB10,CRYAB,CLU,DLC1,TJP1,SSH2,TMEFF2	In_3/3_up		GO:CC	somatodendritic compartment	GO:0036477	1.54315e-05	4.81159	873	30	10	18956	HSP90AA1,MAGI2,ANKS1B,DLG2,DAB1,RTN4,GPHN,CNTNAP2,GRIK2,CTNND2	In_3/3_down
GO:BP	positive regulation of GTPase activity	GO:0043547	0.00347389	2.45918	409	172	13	18017	ARHGAP24,DOCK8,ARAP2,DOCK5,ARHGAP21,MAP4K4,DLC1,DOCK10,AGAP1,DOCK4,THY1,ARHGAP26,BCAS3	In_3/3_up		GO:CC	cell projection	GO:0042995	1.54315e-05	4.81159	2353	30	15	18956	AHI1,CALM1,ATP1B1,AUTS2,HSP90AA1,MAGI2,ANKS1B,DLG2,DAB1,SYT1,RTN4,GPHN,CNTNAP2,GRIK2,CTNND2	In_3/3_down
GO:BP	positive regulation of cell motility	GO:2000147	0.00389694	2.40928	591	172	16	18017	TF,DOCK8,GAB1,DOCK5,RELN,MAP4K4,SHTN1,PTK2,TJP1,ATP8A1,DOCK4,THY1,SSH2,HDAC9,BCAS3,PPP3CA	In_3/3_up		GO:CC	neuron projection	GO:0043005	1.54315e-05	4.81159	1396	30	12	18956	CALM1,AUTS2,HSP90AA1,MAGI2,ANKS1B,DLG2,DAB1,SYT1,GPHN,CNTNAP2,GRIK2,CTNND2	In_3/3_down
GO:BP	regeneration	GO:0031099	0.00400489	2.39741	209	172	9	18017	DHFR,SPP1,NEFL,TNR,MAP4K4,ERBB4,THY1,PKM,PPP3CA	In_3/3_up		GO:CC	plasma membrane bounded cell projection	GO:0120025	5.74086e-05	4.24102	2256	30	14	18956	AHI1,CALM1,ATP1B1,AUTS2,HSP90AA1,MAGI2,ANKS1B,DLG2,DAB1,SYT1,GPHN,CNTNAP2,GRIK2,CTNND2	In_3/3_down
GO:BP	regulation of endocytosis	GO:0030100	0.00400489	2.39741	209	172	9	18017	TF,APOE,ABCA2,HIP1,CLU,SH3GL3,B2M,DNAJC6,PPP3CA	In_3/3_up		GO:CC	neuronal cell body	GO:0043025	0.000336079	3.47356	535	30	7	18956	HSP90AA1,DLG2,DAB1,RTN4,CNTNAP2,GRIK2,CTNND2	In_3/3_down
GO:BP	regulation of anatomical structure size	GO:0090066	0.00404576	2.393	533	172	15	18017	SPP1,APOE,DOCK5,NEFL,TMSB10,TNR,DLG1,CHRM3,DSCAM,DCC,SHTN1,FCHSD2,ASIC2,DOCK4,SSH2	In_3/3_up		GO:CC	potassium channel complex	GO:0034705	0.000351339	3.45427	100	30	4	18956	CALM1,DLG2,CNTNAP2,GRIK2	In_3/3_down
GO:BP	neuromuscular process controlling balance	GO:0050885	0.00450696	2.34612	57	172	5	18017	SLC1A3,NEFL,TNR,PSAP,PCDH15	In_3/3_up		GO:CC	cell body	GO:0044297	0.000661782	3.17928	609	30	7	18956	HSP90AA1,DLG2,DAB1,RTN4,CNTNAP2,GRIK2,CTNND2	In_3/3_down
GO:BP	regulation of muscle system process	GO:0090257	0.00462953	2.33446	262	172	10	18017	DOCK5,PDE4B,DLG1,MEF2A,CTNNA3,CHRM3,PTK2,CAMK2B,DOCK4,PPP3CA	In_3/3_up		GO:CC	dendritic tree	GO:0097447	0.000711283	3.14796	629	30	7	18956	HSP90AA1,MAGI2,ANKS1B,GPHN,CNTNAP2,GRIK2,CTNND2	In_3/3_down
GO:BP	cell death	GO:0008219	0.00466585	2.33107	2300	172	39	18017	MTRNR2L8,MTRNR2L12,SLC5A11,DOCK8,APOE,GRIN1,ST18,HIP1,NEFL,PDE1A,CRYAB,PRUNE2,PHLPP1,CLU,CHST11,MEF2A,ELMO1,APLP1,GRID2,MAP4K4,DLC1,YWHAH,DCC,PTK2,PDE8A,PRNP,FAIM2,PRKCB,UNC5C,PTMA,TRIM2,ERBB4,PSAP,ASIC2,PKM,SGK1,CADM1,ROBO1,DYNLL1	In_3/3_up		GO:CC	dendrite	GO:0030425	0.000711283	3.14796	627	30	7	18956	HSP90AA1,MAGI2,ANKS1B,GPHN,CNTNAP2,GRIK2,CTNND2	In_3/3_down
GO:BP	homophilic cell adhesion via plasma membrane adhesion molecules	GO:0007156	0.00466705	2.33096	169	172	8	18017	CDH20,DSCAM,PCDH7,CDH12,PCDH15,PCDH9,CADM1,ROBO1	In_3/3_up		GO:CC	axon	GO:0030424	0.000890746	3.05025	658	30	7	18956	CALM1,AUTS2,HSP90AA1,DLG2,SYT1,CNTNAP2,GRIK2	In_3/3_down
GO:BP	neuron migration	GO:0001764	0.00466705	2.33096	169	172	8	18017	NRG1,RELN,ZSWIM6,DCC,SHTN1,PTK2,CAMK2B,ERBB4	In_3/3_up		GO:CC	cell-cell junction	GO:0005911	0.00146965	2.83278	502	30	6	18956	AHI1,ATP1B1,MAGI2,KAZN,CNTNAP2,CTNND2	In_3/3_down
GO:BP	regulation of GTPase activity	GO:0043087	0.00486301	2.31309	484	172	14	18017	ARHGAP24,DOCK8,ARAP2,DOCK5,ARHGAP21,MAP4K4,DLC1,DOCK10,AGAP1,PTK2,DOCK4,THY1,ARHGAP26,BCAS3	In_3/3_up		GO:CC	perikaryon	GO:0043204	0.00146965	2.83278	159	30	4	18956	DLG2,CNTNAP2,GRIK2,CTNND2	In_3/3_down
GO:BP	response to wounding	GO:0009611	0.00512565	2.29025	672	172	17	18017	DHFR,SPP1,ARHGAP24,DOCK8,SLC1A3,APOE,SLC1A2,NEFL,NRG1,ITPR2,TNR,PTK2,ACTB,PRKCB,TMEFF2,PPP3CA,DGKB	In_3/3_up		GO:CC	juxtaparanode region of axon	GO:0044224	0.00146965	2.83278	10	30	2	18956	DLG2,CNTNAP2	In_3/3_down
GO:BP	regulation of cell adhesion	GO:0030155	0.0052054	2.28355	738	172	18	18017	DOCK8,LAMA2,APBB1IP,DOCK5,MBP,TNR,DLG1,EDIL3,MAP4K4,DLC1,DSCAM,PTK2,PRNP,GPM6B,TJP1,THY1,BCAS3,PPP3CA	In_3/3_up		GO:CC	transmembrane transporter complex	GO:1902495	0.00166702	2.77806	322	30	5	18956	CALM1,ATP1B1,DLG2,CNTNAP2,GRIK2	In_3/3_down
GO:BP	regulation of ion transmembrane transporter activity	GO:0032412	0.00533494	2.27287	268	172	10	18017	GRIN1,NEFL,PDE4B,RELN,CACNA2D1,DLG1,CHRM3,YWHAH,PRNP,CACNB2	In_3/3_up		GO:CC	plasma membrane	GO:0005886	0.00170581	2.76807	5655	30	19	18956	DLGAP1,CALM1,ATP1B1,NRXN3,HSP90AA1,MAGI2,KAZN,ANKS1B,DLG2,FAM155A,SYT1,RTN4,MDGA2,GPHN,CNTNAP2,GRIK2,GRIK1,CTNND2,ADGRB3	In_3/3_down
GO:BP	midbrain development	GO:0030901	0.00536909	2.2701	93	172	6	18017	PLP1,CNP,MBP,YWHAH,ACTB,DYNLL1	In_3/3_up		GO:CC	transporter complex	GO:1990351	0.00170693	2.76778	330	30	5	18956	CALM1,ATP1B1,DLG2,CNTNAP2,GRIK2	In_3/3_down
GO:BP	positive regulation of low-density lipoprotein particle receptor catabolic process	GO:0032805	0.00536909	2.2701	3	172	2	18017	APOE,ABCA2	In_3/3_up		GO:CC	cell periphery	GO:0071944	0.00209103	2.67964	5768	30	19	18956	DLGAP1,CALM1,ATP1B1,NRXN3,HSP90AA1,MAGI2,KAZN,ANKS1B,DLG2,FAM155A,SYT1,RTN4,MDGA2,GPHN,CNTNAP2,GRIK2,GRIK1,CTNND2,ADGRB3	In_3/3_down
GO:BP	negative regulation of vascular associated smooth muscle contraction	GO:1904694	0.00536909	2.2701	3	172	2	18017	DOCK5,DOCK4	In_3/3_up		GO:CC	synaptic membrane	GO:0097060	0.00229328	2.63954	358	30	5	18956	DLG2,SYT1,GPHN,GRIK2,GRIK1	In_3/3_down
GO:BP	programmed cell death	GO:0012501	0.00536909	2.2701	2158	172	37	18017	MTRNR2L8,MTRNR2L12,SLC5A11,DOCK8,APOE,GRIN1,ST18,HIP1,NEFL,PDE1A,CRYAB,PRUNE2,PHLPP1,CLU,CHST11,MEF2A,ELMO1,APLP1,GRID2,MAP4K4,DLC1,YWHAH,DCC,PTK2,PRNP,FAIM2,PRKCB,UNC5C,PTMA,TRIM2,ERBB4,ASIC2,PKM,SGK1,CADM1,ROBO1,DYNLL1	In_3/3_up		GO:CC	voltage-gated potassium channel complex	GO:0008076	0.00374103	2.42701	90	30	3	18956	CALM1,DLG2,CNTNAP2	In_3/3_down
GO:BP	telencephalon development	GO:0021537	0.00536909	2.2701	269	172	10	18017	GRIN1,NRGN,SLC1A2,NEFL,NRG1,RELN,TNR,ZSWIM6,ERBB4,ROBO1	In_3/3_up		GO:CC	cation channel complex	GO:0034703	0.00391002	2.40782	225	30	4	18956	CALM1,DLG2,CNTNAP2,GRIK2	In_3/3_down
GO:BP	regulation of amyloid-beta formation	GO:1902003	0.00536909	2.2701	33	172	4	18017	APOE,ABCA2,CLU,PRNP	In_3/3_up		GO:CC	postsynaptic membrane	GO:0045211	0.0058306	2.23429	255	30	4	18956	DLG2,GPHN,GRIK2,GRIK1	In_3/3_down
GO:BP	learning or memory	GO:0007611	0.00544915	2.26367	270	172	10	18017	APOE,GRIN1,NRGN,RELN,TNR,B2M,PRNP,ATP8A1,SGK1,NDRG4	In_3/3_up		GO:CC	exocytic vesicle membrane	GO:0099501	0.0058306	2.23429	110	30	3	18956	CALM1,DLG2,SYT1	In_3/3_down
GO:BP	negative regulation of amyloid-beta formation	GO:1902430	0.00566411	2.24687	14	172	3	18017	APOE,CLU,PRNP	In_3/3_up		GO:CC	synaptic vesicle membrane	GO:0030672	0.0058306	2.23429	110	30	3	18956	CALM1,DLG2,SYT1	In_3/3_down
GO:BP	regulation of small GTPase mediated signal transduction	GO:0051056	0.00566826	2.24655	324	172	11	18017	ARHGAP24,ARAP2,APOE,ARHGAP21,NRG1,RELN,PSD3,MAP4K4,DLC1,ARHGAP26,ROBO1	In_3/3_up		GO:CC	presynapse	GO:0098793	0.0086203	2.06448	502	30	5	18956	CALM1,NRXN3,DLG2,SYT1,GRIK2	In_3/3_down
GO:BP	regulation of neuron projection regeneration	GO:0070570	0.00578728	2.23753	34	172	4	18017	SPP1,TNR,MAP4K4,THY1	In_3/3_up		GO:CC	ion channel complex	GO:0034702	0.00966807	2.01466	300	30	4	18956	CALM1,DLG2,CNTNAP2,GRIK2	In_3/3_down
GO:BP	maintenance of blood-brain barrier	GO:0035633	0.00643973	2.19113	35	172	4	18017	LAMA2,MBP,ACTB,TJP1	In_3/3_up		REAC	Ionotropic activity of kainate receptors	REAC:R-HSA-451306	0.000150858	3.82143	10	24	3	10627	CALM1,GRIK2,GRIK1	In_3/3_down
GO:BP	synaptic transmission, glutamatergic	GO:0035249	0.00643973	2.19113	97	172	6	18017	GRIN1,GRM3,RELN,TNR,GRID2,GRM7	In_3/3_up		REAC	Activation of Ca-permeable Kainate Receptor	REAC:R-HSA-451308	0.000150858	3.82143	10	24	3	10627	CALM1,GRIK2,GRIK1	In_3/3_down
GO:BP	ion transmembrane transport	GO:0034220	0.00681799	2.16634	1179	172	24	18017	SLC26A3,SLC1A3,GRIN1,KCNH8,SLC1A2,TMEM165,NEFL,ITPR2,PDE4B,RELN,CACNA2D1,DLG1,GRID2,CHRM3,CACNA2D3,YWHAH,SLC9A9,PRNP,ATP8A1,ASIC2,CACNB2,THY1,KCNQ5,SGK1	In_3/3_up		REAC	Activation of Na-permeable kainate receptors	REAC:R-HSA-451307	0.000408988	3.38829	2	24	2	10627	GRIK2,GRIK1	In_3/3_down
GO:BP	cellular component maintenance	GO:0043954	0.00689559	2.16143	64	172	5	18017	CBLN2,APOE,DLG1,PRNP,TJP1	In_3/3_up		REAC	Neurexins and neuroligins	REAC:R-HSA-6794361	0.000426337	3.37025	56	24	4	10627	DLGAP1,NRXN3,DLG2,SYT1	In_3/3_down
GO:BP	positive regulation of cell migration	GO:0030335	0.00708071	2.14992	569	172	15	18017	DOCK8,GAB1,DOCK5,RELN,MAP4K4,SHTN1,PTK2,TJP1,ATP8A1,DOCK4,THY1,SSH2,HDAC9,BCAS3,PPP3CA	In_3/3_up		REAC	Neuronal System	REAC:R-HSA-112316	0.000942608	3.02567	399	24	7	10627	DLGAP1,CALM1,NRXN3,DLG2,SYT1,GRIK2,GRIK1	In_3/3_down
GO:BP	positive regulation of nervous system development	GO:0051962	0.00708071	2.14992	569	172	15	18017	ENC1,CBLN2,APOE,MAN2A1,NEFL,LINGO2,RELN,SH3GL3,GRID2,DSCAM,SHTN1,CAMK2B,ASIC2,ROBO1,NDRG4	In_3/3_up		REAC	Uptake and actions of bacterial toxins	REAC:R-HSA-5339562	0.000942608	3.02567	25	24	3	10627	CALM1,HSP90AA1,SYT1	In_3/3_down
GO:BP	regulation of glutamate receptor signaling pathway	GO:1900449	0.00730025	2.13666	65	172	5	18017	GRIN1,NEFL,RELN,DLG1,PRNP	In_3/3_up		REAC	Protein-protein interactions at synapses	REAC:R-HSA-6794362	0.00123871	2.90703	86	24	4	10627	DLGAP1,NRXN3,DLG2,SYT1	In_3/3_down
GO:BP	regulation of cellular process	GO:0050794	0.00757481	2.12063	11418	172	130	18017	RASGEF1B,DHFR,MTRNR2L8,MTRNR2L12,LINGO1,SPP1,TF,ENC1,ARHGAP24,DOCK8,LAMA2,TSHZ2,ARAP2,SLC1A3,APBB1IP,CNDP1,CBLN2,C10ORF90,APOE,GRIN1,GAB1,KCNH8,GRM3,ST18,ADGRV1,ABCA2,DOCK5,PIP4K2A,NRGN,SLC1A2,RNF220,CREB5,PTPRK,ARHGAP21,HIP1,MAN2A1,CLMN,NFIA,MAML2,GPC5,NEFL,POLR2F,NRG1,LINGO2,ITPR2,TMSB10,PDE1A,ZNF91,PDE4B,CRYAB,RELN,LDLRAD4,MBP,TNR,PDE1C,PHLPP1,CLU,SH3GL3,ZBTB20,ALCAM,PSD3,FBXL7,CACNA2D1,ZSWIM6…	In_3/3_up		REAC	Activation of kainate receptors upon glutamate binding	REAC:R-HSA-451326	0.00123871	2.90703	30	24	3	10627	CALM1,GRIK2,GRIK1	In_3/3_down
GO:BP	regulation of synapse assembly	GO:0051963	0.00768402	2.11441	101	172	6	18017	CBLN2,GRIN1,LINGO2,GRID2,PTK2,ASIC2	In_3/3_up		REAC	Phase 0 - rapid depolarisation	REAC:R-HSA-5576892	0.00284425	2.54603	41	24	3	10627	CALM1,FGF12,FGF14	In_3/3_down
GO:BP	regulation of NMDA receptor activity	GO:2000310	0.00768402	2.11441	37	172	4	18017	GRIN1,NEFL,RELN,DLG1	In_3/3_up		REAC	Tetrahydrobiopterin (BH4) synthesis, recycling, salvage and regulation	REAC:R-HSA-1474151	0.00494066	2.30622	10	24	2	10627	CALM1,HSP90AA1	In_3/3_down
GO:BP	regulation of high voltage-gated calcium channel activity	GO:1901841	0.0080367	2.09492	16	172	3	18017	PDE4B,CACNA2D1,CACNB2	In_3/3_up		REAC	Transmission across Chemical Synapses	REAC:R-HSA-112315	0.00494066	2.30622	258	24	5	10627	CALM1,DLG2,SYT1,GRIK2,GRIK1	In_3/3_down
GO:BP	adherens junction organization	GO:0034332	0.00819765	2.08631	67	172	5	18017	CDH20,ACTB,TJP1,CDH12,CADM1	In_3/3_up		REAC	Cardiac conduction	REAC:R-HSA-5576891	0.00494066	2.30622	136	24	4	10627	CALM1,ATP1B1,FGF12,FGF14	In_3/3_down
GO:BP	positive regulation of endocytosis	GO:0045807	0.00840843	2.07529	103	172	6	18017	TF,APOE,HIP1,CLU,B2M,PPP3CA	In_3/3_up		REAC	eNOS activation	REAC:R-HSA-203615	0.0051269	2.29015	11	24	2	10627	CALM1,HSP90AA1	In_3/3_down
GO:BP	positive regulation of cell junction assembly	GO:1901890	0.00881023	2.05501	104	172	6	18017	CBLN2,LINGO2,GRID2,MAP4K4,ASIC2,THY1	In_3/3_up		REAC	Metabolism of nitric oxide: NOS3 activation and regulation	REAC:R-HSA-202131	0.00903857	2.0439	15	24	2	10627	CALM1,HSP90AA1	In_3/3_down
GO:BP	amyloid-beta formation	GO:0034205	0.00916651	2.0378	39	172	4	18017	APOE,ABCA2,CLU,PRNP	In_3/3_up		WP	Splicing factor NOVA regulated synaptic proteins	WP:WP4148	0.00654613	2.18402	42	21	3	7474	DAB1,GPHN,GRIK2	In_3/3_down
GO:BP	negative regulation of amyloid precursor protein catabolic process	GO:1902992	0.00945536	2.02432	17	172	3	18017	APOE,CLU,PRNP	In_3/3_up		WP	Disruption of postsynaptic signalling by CNV	WP:WP4875	0.00654613	2.18402	34	21	3	7474	DLGAP1,NRXN3,DLG2	In_3/3_down
GO:BP	D-aspartate import across plasma membrane	GO:0070779	0.00949639	2.02244	4	172	2	18017	SLC1A3,SLC1A2	In_3/3_up		HP	Involuntary movements	HP:0004305	0.00109903	2.95899	893	13	11	4322	AHI1,AUTS2,RORA,FGF12,FGF14,DAB1,SYT1,GPHN,CNTNAP2,GRIK2,CTNND2	In_3/3_down
GO:BP	D-aspartate transport	GO:0070777	0.00949639	2.02244	4	172	2	18017	SLC1A3,SLC1A2	In_3/3_up		GO:MF	diamine N-acetyltransferase activity	GO:0004145	0.0072565	2.13927	3	3	1	18602	SAT1	Mic_3/3_down
GO:BP	positive regulation of amyloid fibril formation	GO:1905908	0.00949639	2.02244	4	172	2	18017	APOE,CLU	In_3/3_up		GO:MF	polyamine binding	GO:0019808	0.0072565	2.13927	3	3	1	18602	SAT1	Mic_3/3_down
GO:BP	amyloid precursor protein metabolic process	GO:0042982	0.00965735	2.01514	70	172	5	18017	APOE,ABCA2,CLU,DLG1,PRNP	In_3/3_up		GO:MF	spermidine binding	GO:0019809	0.0072565	2.13927	2	3	1	18602	SAT1	Mic_3/3_down
GO:BP	regulation of metal ion transport	GO:0010959	0.00967002	2.01457	407	172	12	18017	TF,GRIN1,PDE4B,CACNA2D1,DLG1,B2M,YWHAH,CAMK2B,PRNP,CACNB2,NKAIN2,THY1	In_3/3_up		REAC	Interconversion of polyamines	REAC:R-HSA-351200	0.00263467	2.57927	2	2	1	10627	SAT1	Mic_3/3_down
GO:BP	response to oxygen-containing compound	GO:1901700	0.00973004	2.01189	1755	172	31	18017	SLC26A3,DHFR,SPP1,CNP,APOE,GRIN1,GAB1,ABCA2,SLC1A2,PTPRK,NEFL,ITPR2,PDE4B,CRYAB,CLU,ZBTB20,CACNA2D1,QDPR,APLP1,MAP4K4,CHRM3,PTK2,ACTB,PDE8A,PRNP,TJP1,PRKCB,PSAP,HDAC9,PKM,PPP3CA	In_3/3_up		WP	Nucleotide Metabolism	WP:WP404	0.00635537	2.19686	19	1	1	7474	SAT1	Mic_3/3_down
GO:BP	regulation of amyloid precursor protein catabolic process	GO:1902991	0.00973004	2.01189	40	172	4	18017	APOE,ABCA2,CLU,PRNP	In_3/3_up		WP	NOTCH1 regulation of human endothelial cell calcification	WP:WP3413	0.00635537	2.19686	18	1	1	7474	SAT1	Mic_3/3_down
GO:BP	protein localization to cell junction	GO:1902414	0.00977076	2.01007	107	172	6	18017	GRIN1,RELN,DLG1,ACTB,TJP1,ASIC2	In_3/3_up		WP	Ferroptosis	WP:WP4313	0.00891981	2.04964	40	1	1	7474	SAT1	Mic_3/3_down
GO:CC	cell junction	GO:0030054	3.83741e-18	17.416	2058	175	66	18956	ARHGAP24,LAMA2,PLP1,SLC1A3,APBB1IP,CBLN2,CNP,APOE,GRIN1,GAB1,GRM3,ADGRV1,NRGN,SLC1A2,PTPRK,ARHGAP21,HIP1,CDH20,NFIA,CLDN11,NEFL,NRG1,FRMD4B,PDE4B,CRYAB,MBP,TNR,CLU,SH3GL3,ALCAM,PSD3,DLG1,B2M,PDZD2,GRID2,CTNNA3,MAP4K4,DLC1,CHRM3,DOCK10,DSCAM,YWHAH,DCC,PTK2,CAMK2B,ACTB,DNAJC6,PRNP,GRM7,TJP1,FAIM2,PRKCB,UNC5C,ERBB4,FCHSD2,ASIC2,CDH12,PCDH15,CACNB2,THY1,ARHGAP26,PCDH9,PPP3CA,QKI,CADM1,DGKB	In_3/3_up		GO:MF	3',5'-cyclic-nucleotide phosphodiesterase activity	GO:0004114	0.00435454	2.36106	27	40	3	18602	PDE4B,PDE8A,PDE1A	Oli_3/3_down
GO:CC	synapse	GO:0045202	9.52857e-13	12.021	1293	175	45	18956	LAMA2,PLP1,SLC1A3,CBLN2,CNP,APOE,GRIN1,GRM3,ADGRV1,NRGN,SLC1A2,HIP1,NEFL,NRG1,PDE4B,CRYAB,MBP,TNR,CLU,SH3GL3,PSD3,DLG1,GRID2,CHRM3,DOCK10,DSCAM,DCC,PTK2,CAMK2B,ACTB,DNAJC6,PRNP,GRM7,FAIM2,PRKCB,UNC5C,ERBB4,FCHSD2,ASIC2,PCDH15,CACNB2,PPP3CA,QKI,CADM1,DGKB	In_3/3_up		GO:MF	cyclic-nucleotide phosphodiesterase activity	GO:0004112	0.00435454	2.36106	29	40	3	18602	PDE4B,PDE8A,PDE1A	Oli_3/3_down
GO:CC	cell projection	GO:0042995	7.23257e-12	11.1407	2353	175	60	18956	SLC26A3,SPP1,ARHGAP24,DOCK8,LAMA2,SLC1A3,APBB1IP,CNP,APOE,GRIN1,GRM3,ADGRV1,NRGN,SLC1A2,PTPRK,CLDN11,NEFL,NRG1,FRMD4B,PDE4B,CRYAB,RELN,MBP,PDE1C,CLU,ALCAM,PSD3,ZSWIM6,DLG1,QDPR,IQCJ-SCHIP1,GRID2,CTNNA3,DLC1,CHRM3,DOCK10,DSCAM,DCC,SHTN1,PTK2,CAMK2B,ACTB,PRNP,GRM7,TJP1,PRKCB,UNC5C,NCAM2,FCHSD2,ASIC2,PCDH15,DOCK4,THY1,PCDH9,TTLL7,PKM,PPP3CA,ROBO1,DYNLL1,NDRG4	In_3/3_up		GO:BP	purine-containing compound catabolic process	GO:0072523	0.00192617	2.71531	53	41	4	18017	PDE4B,PDE8A,PDE1A,DPYD	Oli_3/3_down
GO:CC	neuron projection	GO:0043005	7.57249e-12	11.1208	1396	175	45	18956	LAMA2,SLC1A3,APOE,GRIN1,GRM3,ADGRV1,NRGN,SLC1A2,PTPRK,CLDN11,NEFL,NRG1,PDE4B,CRYAB,RELN,MBP,CLU,ALCAM,ZSWIM6,DLG1,QDPR,IQCJ-SCHIP1,GRID2,CHRM3,DOCK10,DSCAM,DCC,SHTN1,PTK2,CAMK2B,ACTB,PRNP,GRM7,PRKCB,UNC5C,NCAM2,FCHSD2,ASIC2,PCDH15,DOCK4,THY1,PCDH9,TTLL7,PPP3CA,ROBO1	In_3/3_up		GO:BP	regulation of actin filament-based process	GO:0032970	0.00192617	2.71531	414	41	8	18017	PDE4B,ANK2,SSH2,LIMCH1,DLC1,TMEFF2,TJP1,CTNNA3	Oli_3/3_down
GO:CC	plasma membrane bounded cell projection	GO:0120025	3.65913e-11	10.4366	2256	175	57	18956	SLC26A3,DOCK8,LAMA2,SLC1A3,APBB1IP,CNP,APOE,GRIN1,GRM3,ADGRV1,NRGN,SLC1A2,PTPRK,CLDN11,NEFL,NRG1,FRMD4B,PDE4B,CRYAB,RELN,MBP,PDE1C,CLU,ALCAM,PSD3,ZSWIM6,DLG1,QDPR,IQCJ-SCHIP1,GRID2,CTNNA3,DLC1,CHRM3,DOCK10,DSCAM,DCC,SHTN1,PTK2,CAMK2B,ACTB,PRNP,GRM7,PRKCB,UNC5C,NCAM2,FCHSD2,ASIC2,PCDH15,DOCK4,THY1,PCDH9,TTLL7,PKM,PPP3CA,ROBO1,DYNLL1,NDRG4	In_3/3_up		GO:BP	cyclic nucleotide catabolic process	GO:0009214	0.00192617	2.71531	15	41	3	18017	PDE4B,PDE8A,PDE1A	Oli_3/3_down
GO:CC	axon	GO:0030424	3.11837e-08	7.50607	658	175	26	18956	GRIN1,GRM3,NRGN,SLC1A2,PTPRK,CLDN11,NEFL,NRG1,CRYAB,MBP,ALCAM,DLG1,IQCJ-SCHIP1,CHRM3,DSCAM,DCC,SHTN1,ACTB,PRNP,GRM7,PRKCB,UNC5C,NCAM2,THY1,PCDH9,ROBO1	In_3/3_up		GO:BP	regulation of localization	GO:0032879	0.00192617	2.71531	2913	41	19	18017	PDE4B,KCNH8,ANK2,SH3GL3,FRMD5,DMD,SSH2,DLG2,SYT1,LDLRAD4,GRIA2,ATP8A1,LIMCH1,DLC1,SNAP25,TMEFF2,AKAP6,TJP1,CTNNA3	Oli_3/3_down
GO:CC	cell periphery	GO:0071944	5.0948e-08	7.29287	5768	175	92	18956	SLC26A3,LINGO1,TF,SLC5A11,DOCK8,LAMA2,PLP1,SLC1A3,APBB1IP,C10ORF90,CNP,APOE,GRIN1,KCNH8,GRM3,MOBP,ADGRV1,ABCA2,DOCK5,PIP4K2A,NRGN,SLC1A2,PTPRK,ARHGAP21,HIP1,CDH20,GPC5,CLDN11,NRG1,ITPR2,PDE4B,CRYAB,RELN,MBP,PHLPP1,CLU,LHFPL3,ALCAM,PSD3,CACNA2D1,DLG1,B2M,SLC44A1,ELMO1,APLP1,GRID2,DLC1,CHRM3,CACNA2D3,FRYL,DSCAM,YWHAH,DCC,SLCO3A1,PTK2,PLCL1,ACTB,SLC9A9,PRNP,GPM6B,GRM7,PCDH7,TJP1,ATP8A1,FAIM2,PRKCB,U…	In_3/3_up		GO:BP	regulation of cation channel activity	GO:2001257	0.00192617	2.71531	187	41	6	18017	PDE4B,ANK2,DMD,DLG2,GRIA2,AKAP6	Oli_3/3_down
GO:CC	somatodendritic compartment	GO:0036477	1.14336e-07	6.94182	873	175	29	18956	ENC1,LAMA2,SLC1A3,APOE,GRIN1,GRM3,NRGN,PTPRK,PDE1A,PDE4B,CRYAB,RELN,MBP,PDE1C,CLU,ALCAM,GRID2,CHRM3,DOCK10,DSCAM,SHTN1,PTK2,PRNP,GRM7,UNC5C,ASIC2,THY1,TTLL7,PPP3CA	In_3/3_up		GO:BP	actin filament-based process	GO:0030029	0.00200498	2.69789	813	41	10	18017	PDE4B,ANK2,FRMD5,DMD,SSH2,LIMCH1,DLC1,TMEFF2,TJP1,CTNNA3	Oli_3/3_down
GO:CC	postsynapse	GO:0098794	3.14169e-07	6.50284	591	175	23	18956	LAMA2,GRIN1,GRM3,NRGN,HIP1,PDE4B,CRYAB,SH3GL3,PSD3,DLG1,GRID2,CHRM3,DOCK10,DCC,PTK2,DNAJC6,PRNP,GRM7,FAIM2,ERBB4,ASIC2,PPP3CA,DGKB	In_3/3_up		GO:BP	cation transport	GO:0006812	0.00200498	2.69789	1197	41	12	18017	SLC5A11,PDE4B,KCNH8,ANK2,TMEM165,DMD,DLG2,SYT1,GRIA2,ATP8A1,SNAP25,AKAP6	Oli_3/3_down
GO:CC	plasma membrane	GO:0005886	4.81387e-07	6.31751	5655	175	88	18956	SLC26A3,LINGO1,TF,SLC5A11,DOCK8,LAMA2,PLP1,SLC1A3,APBB1IP,C10ORF90,CNP,APOE,GRIN1,KCNH8,GRM3,ADGRV1,ABCA2,DOCK5,PIP4K2A,NRGN,SLC1A2,PTPRK,ARHGAP21,HIP1,CDH20,GPC5,CLDN11,NRG1,ITPR2,PDE4B,CRYAB,RELN,MBP,PHLPP1,LHFPL3,ALCAM,PSD3,CACNA2D1,DLG1,B2M,SLC44A1,ELMO1,APLP1,GRID2,DLC1,CHRM3,CACNA2D3,DSCAM,YWHAH,DCC,SLCO3A1,PTK2,PLCL1,ACTB,SLC9A9,PRNP,GPM6B,GRM7,PCDH7,TJP1,ATP8A1,FAIM2,PRKCB,UNC5C,ERBB4,NCA…	In_3/3_up		GO:BP	actin-mediated cell contraction	GO:0070252	0.00200498	2.69789	123	41	5	18017	PDE4B,ANK2,DMD,LIMCH1,CTNNA3	Oli_3/3_down
GO:CC	dendrite	GO:0030425	7.51861e-07	6.12386	627	175	23	18956	LAMA2,APOE,GRIN1,GRM3,NRGN,PTPRK,PDE4B,CRYAB,RELN,CLU,ALCAM,GRID2,CHRM3,DOCK10,DSCAM,PTK2,PRNP,GRM7,UNC5C,ASIC2,THY1,TTLL7,PPP3CA	In_3/3_up		GO:BP	nucleotide catabolic process	GO:0009166	0.00273734	2.56267	67	41	4	18017	PDE4B,PDE8A,PDE1A,FHIT	Oli_3/3_down
GO:CC	dendritic tree	GO:0097447	7.51861e-07	6.12386	629	175	23	18956	LAMA2,APOE,GRIN1,GRM3,NRGN,PTPRK,PDE4B,CRYAB,RELN,CLU,ALCAM,GRID2,CHRM3,DOCK10,DSCAM,PTK2,PRNP,GRM7,UNC5C,ASIC2,THY1,TTLL7,PPP3CA	In_3/3_up		GO:BP	cation transmembrane transport	GO:0098655	0.00311849	2.50606	894	41	10	18017	PDE4B,KCNH8,ANK2,TMEM165,DMD,DLG2,GRIA2,ATP8A1,SNAP25,AKAP6	Oli_3/3_down
GO:CC	glutamatergic synapse	GO:0098978	1.98715e-05	4.70177	248	175	13	18956	CBLN2,APOE,GRIN1,NRGN,HIP1,TNR,SH3GL3,DLG1,GRID2,CHRM3,ACTB,ERBB4,PPP3CA	In_3/3_up		GO:BP	actin filament-based movement	GO:0030048	0.00311849	2.50606	153	41	5	18017	PDE4B,ANK2,DMD,LIMCH1,CTNNA3	Oli_3/3_down
GO:CC	dendritic spine	GO:0043197	2.01728e-05	4.69523	172	175	11	18956	LAMA2,GRIN1,GRM3,NRGN,PDE4B,CRYAB,GRID2,DOCK10,PTK2,ASIC2,PPP3CA	In_3/3_up		GO:BP	nucleoside phosphate catabolic process	GO:1901292	0.00311849	2.50606	73	41	4	18017	PDE4B,PDE8A,PDE1A,FHIT	Oli_3/3_down
GO:CC	neuron spine	GO:0044309	2.23631e-05	4.65047	175	175	11	18956	LAMA2,GRIN1,GRM3,NRGN,PDE4B,CRYAB,GRID2,DOCK10,PTK2,ASIC2,PPP3CA	In_3/3_up		GO:BP	regulation of ion transport	GO:0043269	0.003283	2.48373	726	41	9	18017	PDE4B,KCNH8,ANK2,DMD,DLG2,SYT1,GRIA2,ATP8A1,AKAP6	Oli_3/3_down
GO:CC	anchoring junction	GO:0070161	2.58408e-05	4.58769	840	175	24	18956	ARHGAP24,APBB1IP,GAB1,PTPRK,CDH20,CLDN11,FRMD4B,ALCAM,DLG1,B2M,PDZD2,CTNNA3,MAP4K4,DLC1,YWHAH,PTK2,ACTB,TJP1,CDH12,THY1,ARHGAP26,PCDH9,PPP3CA,CADM1	In_3/3_up		GO:BP	regulation of ion transmembrane transporter activity	GO:0032412	0.003283	2.48373	268	41	6	18017	PDE4B,ANK2,DMD,DLG2,GRIA2,AKAP6	Oli_3/3_down
GO:CC	asymmetric synapse	GO:0032279	3.41772e-05	4.46626	311	175	14	18956	GRIN1,GRM3,NRGN,PDE4B,CRYAB,SH3GL3,PSD3,DLG1,CHRM3,DCC,DNAJC6,PRNP,GRM7,ERBB4	In_3/3_up		GO:BP	regulation of cellular component movement	GO:0051270	0.00352145	2.45328	1142	41	11	18017	PDE4B,ANK2,FRMD5,SSH2,LDLRAD4,ATP8A1,LIMCH1,DLC1,TMEFF2,TJP1,CTNNA3	Oli_3/3_down
GO:CC	neuron to neuron synapse	GO:0098984	6.24832e-05	4.20424	329	175	14	18956	GRIN1,GRM3,NRGN,PDE4B,CRYAB,SH3GL3,PSD3,DLG1,CHRM3,DCC,DNAJC6,PRNP,GRM7,ERBB4	In_3/3_up		GO:BP	regulation of transmembrane transporter activity	GO:0022898	0.00354768	2.45006	279	41	6	18017	PDE4B,ANK2,DMD,DLG2,GRIA2,AKAP6	Oli_3/3_down
GO:CC	postsynaptic membrane	GO:0045211	0.000115083	3.93899	255	175	12	18956	GRIN1,GRM3,NRGN,HIP1,DLG1,GRID2,CHRM3,DCC,GRM7,FAIM2,ERBB4,DGKB	In_3/3_up		GO:BP	regulation of cardiac muscle contraction	GO:0055117	0.00354768	2.45006	84	41	4	18017	PDE4B,ANK2,DMD,CTNNA3	Oli_3/3_down
GO:CC	postsynaptic density	GO:0014069	0.000128251	3.89194	305	175	13	18956	GRIN1,GRM3,NRGN,PDE4B,CRYAB,SH3GL3,PSD3,DLG1,CHRM3,DCC,DNAJC6,PRNP,ERBB4	In_3/3_up		GO:BP	ion transmembrane transport	GO:0034220	0.00356609	2.44781	1179	41	11	18017	PDE4B,KCNH8,ANK2,TMEM165,DMD,DLG2,GRIA2,ATP8A1,ANO4,SNAP25,AKAP6	Oli_3/3_down
GO:CC	cell leading edge	GO:0031252	0.000237772	3.62384	427	175	15	18956	DOCK8,APBB1IP,ADGRV1,SLC1A2,PTPRK,FRMD4B,PSD3,CTNNA3,DLC1,SHTN1,PTK2,ACTB,UNC5C,THY1,BCAS3	In_3/3_up		GO:BP	regulation of transporter activity	GO:0032409	0.00356609	2.44781	294	41	6	18017	PDE4B,ANK2,DMD,DLG2,GRIA2,AKAP6	Oli_3/3_down
GO:CC	postsynaptic specialization	GO:0099572	0.000254379	3.59452	328	175	13	18956	GRIN1,GRM3,NRGN,PDE4B,CRYAB,SH3GL3,PSD3,DLG1,CHRM3,DCC,DNAJC6,PRNP,ERBB4	In_3/3_up		GO:BP	cell junction maintenance	GO:0034331	0.00356609	2.44781	34	41	3	18017	DLG2,TJP1,ADGRB3	Oli_3/3_down
GO:CC	cell-cell junction	GO:0005911	0.00036514	3.43754	502	175	16	18956	ARHGAP24,GAB1,PTPRK,CDH20,CLDN11,FRMD4B,DLG1,PDZD2,CTNNA3,YWHAH,ACTB,TJP1,CDH12,PCDH9,PPP3CA,CADM1	In_3/3_up		GO:BP	regulation of release of sequestered calcium ion into cytosol by sarcoplasmic reticulum	GO:0010880	0.00356609	2.44781	32	41	3	18017	ANK2,DMD,AKAP6	Oli_3/3_down
GO:CC	plasma membrane region	GO:0098590	0.000365326	3.43732	1213	175	27	18956	SLC26A3,TF,DOCK8,SLC1A3,GRIN1,GRM3,ADGRV1,NRGN,SLC1A2,HIP1,CRYAB,PSD3,DLG1,GRID2,DLC1,CHRM3,DCC,PTK2,GRM7,TJP1,FAIM2,ERBB4,FCHSD2,THY1,CADM1,DGKB,NDRG4	In_3/3_up		GO:BP	negative regulation of actin filament bundle assembly	GO:0032232	0.00356609	2.44781	34	41	3	18017	DLC1,TMEFF2,TJP1	Oli_3/3_down
GO:CC	synaptic membrane	GO:0097060	0.000561171	3.25091	358	175	13	18956	GRIN1,GRM3,NRGN,HIP1,CRYAB,DLG1,GRID2,CHRM3,DCC,GRM7,FAIM2,ERBB4,DGKB	In_3/3_up		GO:BP	regulation of stress fiber assembly	GO:0051492	0.00356609	2.44781	94	41	4	18017	LIMCH1,DLC1,TMEFF2,TJP1	Oli_3/3_down
GO:CC	adherens junction	GO:0005912	0.000617713	3.20921	173	175	9	18956	ARHGAP24,PTPRK,CDH20,FRMD4B,DLG1,CTNNA3,ACTB,TJP1,CDH12	In_3/3_up		GO:BP	ribonucleotide catabolic process	GO:0009261	0.00356609	2.44781	33	41	3	18017	PDE4B,PDE8A,PDE1A	Oli_3/3_down
GO:CC	neuronal cell body	GO:0043025	0.000671827	3.17274	535	175	16	18956	ENC1,SLC1A3,APOE,NRGN,PTPRK,PDE1A,CRYAB,MBP,PDE1C,ALCAM,DSCAM,SHTN1,UNC5C,ASIC2,THY1,TTLL7	In_3/3_up		GO:BP	purine ribonucleotide catabolic process	GO:0009154	0.00356609	2.44781	32	41	3	18017	PDE4B,PDE8A,PDE1A	Oli_3/3_down
GO:CC	cell body	GO:0044297	0.000871344	3.05981	609	175	17	18956	ENC1,SLC1A3,APOE,NRGN,SLC1A2,PTPRK,PDE1A,CRYAB,MBP,PDE1C,ALCAM,DSCAM,SHTN1,UNC5C,ASIC2,THY1,TTLL7	In_3/3_up		GO:BP	regulation of calcium ion transmembrane transporter activity	GO:1901019	0.00356609	2.44781	91	41	4	18017	PDE4B,ANK2,DMD,AKAP6	Oli_3/3_down
GO:CC	presynapse	GO:0098793	0.00111245	2.95372	502	175	15	18956	GRIN1,GRM3,SLC1A2,HIP1,NEFL,PDE4B,SH3GL3,CHRM3,ACTB,DNAJC6,PRNP,GRM7,PRKCB,ERBB4,CACNB2	In_3/3_up		GO:BP	negative regulation of stress fiber assembly	GO:0051497	0.00356609	2.44781	31	41	3	18017	DLC1,TMEFF2,TJP1	Oli_3/3_down
GO:CC	Schaffer collateral - CA1 synapse	GO:0098685	0.00125295	2.90207	48	175	5	18956	NEFL,TNR,DCC,PPP3CA,DGKB	In_3/3_up		GO:BP	regulation of striated muscle contraction	GO:0006942	0.00390141	2.40878	99	41	4	18017	PDE4B,ANK2,DMD,CTNNA3	Oli_3/3_down
GO:CC	stereocilium	GO:0032420	0.00233837	2.63109	55	175	5	18956	ADGRV1,ZSWIM6,FCHSD2,PCDH15,DOCK4	In_3/3_up		GO:BP	release of sequestered calcium ion into cytosol by sarcoplasmic reticulum	GO:0014808	0.00390141	2.40878	36	41	3	18017	ANK2,DMD,AKAP6	Oli_3/3_down
GO:CC	stereocilium bundle	GO:0032421	0.003705	2.43121	61	175	5	18956	ADGRV1,ZSWIM6,FCHSD2,PCDH15,DOCK4	In_3/3_up		GO:BP	ion transport	GO:0006811	0.00390141	2.40878	1730	41	13	18017	SLC5A11,PDE4B,KCNH8,ANK2,TMEM165,DMD,DLG2,SYT1,GRIA2,ATP8A1,ANO4,SNAP25,AKAP6	Oli_3/3_down
GO:CC	integral component of postsynaptic density membrane	GO:0099061	0.00425678	2.37092	35	175	4	18956	GRIN1,CHRM3,DCC,ERBB4	In_3/3_up		GO:BP	release of sequestered calcium ion into cytosol by endoplasmic reticulum	GO:1903514	0.00390355	2.40854	37	41	3	18017	ANK2,DMD,AKAP6	Oli_3/3_down
GO:CC	synaptic cleft	GO:0043083	0.00553752	2.25669	16	175	3	18956	LAMA2,APOE,GRIN1	In_3/3_up		GO:BP	regulation of cell junction assembly	GO:1901888	0.00390355	2.40854	197	41	5	18017	PTPRD,LIMCH1,DLC1,TJP1,ADGRB3	Oli_3/3_down
GO:CC	intrinsic component of postsynaptic density membrane	GO:0099146	0.00553752	2.25669	38	175	4	18956	GRIN1,CHRM3,DCC,ERBB4	In_3/3_up		GO:BP	regulation of actomyosin structure organization	GO:0110020	0.00433165	2.36335	105	41	4	18017	LIMCH1,DLC1,TMEFF2,TJP1	Oli_3/3_down
GO:CC	basal part of cell	GO:0045178	0.00570431	2.2438	69	175	5	18956	TF,SLC1A3,CLDN11,CHRM3,ERBB4	In_3/3_up		GO:BP	actomyosin structure organization	GO:0031032	0.00433165	2.36335	204	41	5	18017	FRMD5,LIMCH1,DLC1,TMEFF2,TJP1	Oli_3/3_down
GO:CC	main axon	GO:0044304	0.00570431	2.2438	69	175	5	18956	SLC1A2,MBP,DLG1,IQCJ-SCHIP1,THY1	In_3/3_up		GO:BP	regulation of actin filament bundle assembly	GO:0032231	0.00434965	2.36155	107	41	4	18017	LIMCH1,DLC1,TMEFF2,TJP1	Oli_3/3_down
GO:CC	extracellular matrix	GO:0031012	0.00724995	2.13967	553	175	14	18956	LINGO1,LAMA2,APOE,GPC5,LINGO2,RELN,TNR,CLU,DLG1,APLP1,EDIL3,PSAP,PKM,TMEFF2	In_3/3_up		GO:BP	contractile actin filament bundle assembly	GO:0030038	0.00434965	2.36155	109	41	4	18017	LIMCH1,DLC1,TMEFF2,TJP1	Oli_3/3_down
GO:CC	neuromuscular junction	GO:0031594	0.00724995	2.13967	74	175	5	18956	LAMA2,NEFL,NRG1,DLG1,FCHSD2	In_3/3_up		GO:BP	cyclic nucleotide metabolic process	GO:0009187	0.00434965	2.36155	41	41	3	18017	PDE4B,PDE8A,PDE1A	Oli_3/3_down
GO:CC	membrane	GO:0016020	0.00724995	2.13967	9802	175	112	18956	SLC26A3,LINGO1,TF,SLC5A11,DOCK8,LAMA2,PLP1,PTGDS,TMEM144,SLC1A3,APBB1IP,HS3ST4,C10ORF90,CNP,APOE,GRIN1,KCNH8,GRM3,ST6GAL1,ADGRV1,FKBP5,ABCA2,DOCK5,PIP4K2A,NRGN,SLC1A2,PLXDC2,PTPRK,ARHGAP21,HIP1,MAN2A1,CLMN,CDH20,TMEM165,GPC5,CLDN11,NRG1,LINGO2,ITPR2,PDE4B,CRYAB,RELN,LDLRAD4,PRUNE2,MBP,TNR,PHLPP1,CLU,SH3GL3,LHFPL3,ALCAM,PSD3,CACNA2D1,DIP2B,CHST11,DLG1,B2M,SLC44A1,ELMO1,APLP1,GRID2,DLC1,FUT8,CHRM3,…	In_3/3_up		GO:BP	nucleobase-containing small molecule biosynthetic process	GO:0034404	0.00434965	2.36155	108	41	4	18017	PDE4B,PDE8A,PDE1A,FHIT	Oli_3/3_down
GO:CC	plasma membrane protein complex	GO:0098797	0.00724995	2.13967	686	175	16	18956	TF,APBB1IP,GRIN1,ABCA2,CDH20,PDE4B,ALCAM,CACNA2D1,DLG1,B2M,GRID2,CACNA2D3,CDH12,CACNB2,KCNQ5,SGCZ	In_3/3_up		GO:BP	stress fiber assembly	GO:0043149	0.00434965	2.36155	109	41	4	18017	LIMCH1,DLC1,TMEFF2,TJP1	Oli_3/3_down
GO:CC	cell-cell contact zone	GO:0044291	0.00724995	2.13967	75	175	5	18956	DLG1,CTNNA3,YWHAH,TJP1,PCDH9	In_3/3_up		GO:BP	regulation of ion transmembrane transport	GO:0034765	0.00454216	2.34274	498	41	7	18017	PDE4B,KCNH8,ANK2,DMD,DLG2,GRIA2,AKAP6	Oli_3/3_down
GO:CC	distal axon	GO:0150034	0.00724995	2.13967	308	175	10	18956	GRIN1,NEFL,CHRM3,DSCAM,SHTN1,PRNP,PRKCB,UNC5C,THY1,PCDH9	In_3/3_up		GO:BP	sarcoplasmic reticulum calcium ion transport	GO:0070296	0.00466112	2.33151	43	41	3	18017	ANK2,DMD,AKAP6	Oli_3/3_down
GO:CC	voltage-gated calcium channel complex	GO:0005891	0.00775956	2.11016	44	175	4	18956	PDE4B,CACNA2D1,CACNA2D3,CACNB2	In_3/3_up		GO:BP	regulation of cardiac muscle cell contraction	GO:0086004	0.00466112	2.33151	43	41	3	18017	PDE4B,ANK2,CTNNA3	Oli_3/3_down
GO:CC	postsynaptic density membrane	GO:0098839	0.00777097	2.10952	77	175	5	18956	GRIN1,DLG1,CHRM3,DCC,ERBB4	In_3/3_up		GO:BP	purine nucleotide catabolic process	GO:0006195	0.00510061	2.29238	45	41	3	18017	PDE4B,PDE8A,PDE1A	Oli_3/3_down
GO:CC	cytoplasm	GO:0005737	0.00970318	2.01309	11817	175	129	18956	RASGEF1B,DHFR,MTRNR2L8,MTRNR2L12,ARPP21,SPP1,TF,ENC1,ARHGAP24,DOCK8,PTGDS,ARAP2,SLC1A3,APBB1IP,CNDP1,HS3ST4,C10ORF90,CNP,ADARB2,APOE,GRIN1,GAB1,ST6GAL1,MOBP,ADGRV1,FKBP5,ABCA2,DOCK5,DPYD,PIP4K2A,NRGN,RNF220,ARHGAP21,HIP1,MAN2A1,CLMN,TMEM165,GPC5,CLDN11,NEFL,POLR2F,NRG1,ITPR2,TMSB10,FRMD4B,PDE1A,PDE4B,CRYAB,RELN,LDLRAD4,PRUNE2,PDE1C,PHLPP1,CLU,SH3GL3,ZBTB20,FBXL7,CACNA2D1,DIP2B,CHST11,DLG1,B2M,SLC…	In_3/3_up		GO:BP	regulation of cation transmembrane transport	GO:1904062	0.00510061	2.29238	357	41	6	18017	PDE4B,ANK2,DMD,DLG2,GRIA2,AKAP6	Oli_3/3_down
KEGG	Glutamatergic synapse	KEGG:04724	0.00916029	2.03809	114	92	8	7963	SLC1A3,GRIN1,GRM3,SLC1A2,ITPR2,GRM7,PRKCB,PPP3CA	In_3/3_up		GO:BP	regulation of actin filament-based movement	GO:1903115	0.00604914	2.21831	48	41	3	18017	PDE4B,ANK2,CTNNA3	Oli_3/3_down
REAC	Long-term potentiation	REAC:R-HSA-9620244	3.54807e-05	4.45001	21	112	6	10627	GRIN1,NRGN,NEFL,NRG1,DLG1,CAMK2B	In_3/3_up		GO:BP	transmembrane transport	GO:0055085	0.00643991	2.19112	1632	41	12	18017	SLC5A11,PDE4B,KCNH8,ANK2,TMEM165,DMD,DLG2,GRIA2,ATP8A1,ANO4,SNAP25,AKAP6	Oli_3/3_down
REAC	Ras activation upon Ca2+ influx through NMDA receptor	REAC:R-HSA-442982	0.00772067	2.11234	18	112	4	10627	GRIN1,NEFL,DLG1,CAMK2B	In_3/3_up		GO:BP	cAMP catabolic process	GO:0006198	0.00738806	2.13147	10	41	2	18017	PDE4B,PDE8A	Oli_3/3_down
REAC	Negative regulation of NMDA receptor-mediated neuronal transmission	REAC:R-HSA-9617324	0.00772067	2.11234	20	112	4	10627	GRIN1,NEFL,DLG1,CAMK2B	In_3/3_up		GO:BP	action potential	GO:0001508	0.00910637	2.04065	140	41	4	18017	ANK2,DMD,AKAP6,CTNNA3	Oli_3/3_down
REAC	Unblocking of NMDA receptors, glutamate binding and activation	REAC:R-HSA-438066	0.00772067	2.11234	20	112	4	10627	GRIN1,NEFL,DLG1,CAMK2B	In_3/3_up		GO:BP	cardiac muscle contraction	GO:0060048	0.00947786	2.02329	143	41	4	18017	PDE4B,ANK2,DMD,CTNNA3	Oli_3/3_down
HPA	hippocampus; glial cells[‚â•Medium]	HPA:0250122	0.000302466	3.51932	1944	112	42	10719	LINGO1,PTGDS,SLC1A3,APBB1IP,CNP,APOE,GAB1,KCNH8,FKBP5,PIP4K2A,NRGN,SLC1A2,HIP1,TMEM165,NFIA,GPC5,CLDN11,POLR2F,PDE1A,CRYAB,LDLRAD4,MBP,ZBTB20,DIP2B,QDPR,APLP1,IQCJ-SCHIP1,EDIL3,FUT8,KLHL32,DOCK10,PEX5L,DSCAM,SHTN1,PDE8A,PTMA,TRIM2,PSAP,FMNL2,QKI,SGK1,FTL	In_3/3_up		GO:BP	regulation of muscle system process	GO:0090257	0.00947786	2.02329	262	41	5	18017	PDE4B,ANK2,DMD,AKAP6,CTNNA3	Oli_3/3_down
HPA	hippocampus	HPA:0250000	0.000660608	3.18006	6687	112	92	10719	LINGO1,ARHGAP24,DOCK8,PLP1,PTGDS,SLC1A3,APBB1IP,CNDP1,CNP,APOE,GRIN1,GAB1,KCNH8,FKBP5,ABCA2,DOCK5,PIP4K2A,NRGN,SLC1A2,PLXDC2,ARHGAP21,HIP1,MAN2A1,TMEM165,NFIA,MAML2,GPC5,CLDN11,NEFL,POLR2F,LINGO2,PDE1A,CRYAB,LDLRAD4,MBP,CLU,ZBTB20,ALCAM,PSD3,CACNA2D1,DIP2B,CHST11,DLG1,B2M,MEF2A,QDPR,APLP1,IQCJ-SCHIP1,EDIL3,CTNNA3,FUT8,CHRM3,FOXN3,KLHL32,DOCK10,PEX5L,DSCAM,AK5,DCC,SHTN1,PTK2,PLCL1,CAMK2B,MBNL1,SLC…	In_3/3_up		GO:BP	organophosphate catabolic process	GO:0046434	0.00954185	2.02037	144	41	4	18017	PDE4B,PDE8A,PDE1A,FHIT	Oli_3/3_down
HPA	cerebral cortex; neuropil[‚â•Low]	HPA:0100211	0.00405465	2.39205	4939	112	72	10719	LINGO1,ARHGAP24,DOCK8,PLP1,PTGDS,SLC1A3,CNDP1,CNP,APOE,GAB1,MOBP,NRGN,SLC1A2,PLXDC2,ARHGAP21,HIP1,CLMN,TMEM165,MAML2,GPC5,CLDN11,NEFL,LINGO2,PDE1A,CRYAB,LDLRAD4,MBP,TNR,CLU,SH3GL3,ALCAM,PSD3,CACNA2D1,DIP2B,DLG1,APLP1,IQCJ-SCHIP1,EDIL3,FUT8,FOXN3,DOCK10,FRYL,PEX5L,DSCAM,AK5,DCC,PTK2,PLCL1,CAMK2B,DNAJC6,PDE8A,PRNP,GPM6B,ATP8A1,FAIM2,PRKCB,PTMA,TRIM2,NCAM2,ASIC2,CACNB2,SAT1,THY1,ARHGAP26,IDS,KCNQ5,T…	In_3/3_up		GO:BP	regulation of transmembrane transport	GO:0034762	0.00977979	2.00967	589	41	7	18017	PDE4B,KCNH8,ANK2,DMD,DLG2,GRIA2,AKAP6	Oli_3/3_down
HPA	cerebral cortex; neuropil[‚â•Medium]	HPA:0100212	0.00405465	2.39205	2596	112	46	10719	ARHGAP24,PLP1,SLC1A3,CNP,GAB1,MOBP,NRGN,SLC1A2,PLXDC2,ARHGAP21,HIP1,GPC5,CLDN11,NEFL,LINGO2,CRYAB,MBP,TNR,CLU,SH3GL3,ALCAM,PSD3,DIP2B,DLG1,APLP1,IQCJ-SCHIP1,EDIL3,PEX5L,DCC,PLCL1,CAMK2B,DNAJC6,PRNP,GPM6B,ATP8A1,FAIM2,PRKCB,PTMA,ASIC2,CACNB2,SAT1,THY1,PPP3CA,NTM,CADM1,FTL	In_3/3_up		GO:BP	cell adhesion	GO:0007155	0.0098434	2.00685	1475	41	11	18017	PCDH9,FRMD5,PTPRD,DMD,DLG2,CNTNAP2,LIMCH1,DLC1,TMEFF2,TJP1,CTNNA3	Oli_3/3_down
HPA	cerebral cortex	HPA:0100000	0.00405465	2.39205	7951	112	100	10719	LINGO1,ARPP21,ARHGAP24,DOCK8,LAMA2,PLP1,PTGDS,ARAP2,SLC1A3,CNDP1,CNP,APOE,GRIN1,GAB1,KCNH8,MOBP,FKBP5,ABCA2,PIP4K2A,NRGN,SLC1A2,PLXDC2,ARHGAP21,HIP1,MAN2A1,CLMN,TMEM165,NFIA,MAML2,GPC5,CLDN11,NEFL,POLR2F,LINGO2,PDE1A,CRYAB,LDLRAD4,MBP,TNR,CLU,SH3GL3,ZBTB20,ALCAM,PSD3,CACNA2D1,DIP2B,CHST11,DLG1,B2M,MEF2A,QDPR,APLP1,IQCJ-SCHIP1,EDIL3,FUT8,CHRM3,FOXN3,KLHL32,DOCK10,FRYL,PEX5L,DSCAM,AK5,DCC,SHTN1,PTK…	In_3/3_up		GO:CC	cell junction	GO:0030054	2.1268e-05	4.67227	2058	41	18	18956	PDE4B,FRMD4B,PCDH9,ANK2,SH3GL3,FRMD5,PTPRD,DMD,DLG2,SYT1,GRIA2,CNTNAP2,DLC1,SNAP25,AKAP6,TJP1,CTNNA3,ADGRB3	Oli_3/3_down
HPA	cerebral cortex; neuropil[High]	HPA:0100213	0.00405465	2.39205	403	112	14	10719	PLP1,SLC1A3,CNP,SLC1A2,HIP1,GPC5,NEFL,IQCJ-SCHIP1,GPM6B,FAIM2,PTMA,ASIC2,PPP3CA,CADM1	In_3/3_up		GO:CC	cell-cell contact zone	GO:0044291	8.57491e-05	4.06677	75	41	5	18956	PCDH9,ANK2,AKAP6,TJP1,CTNNA3	Oli_3/3_down
HPA	hippocampus; glial cells[‚â•Low]	HPA:0250121	0.00506274	2.29561	4049	112	62	10719	LINGO1,ARHGAP24,PTGDS,SLC1A3,APBB1IP,CNDP1,CNP,APOE,GAB1,KCNH8,FKBP5,DOCK5,PIP4K2A,NRGN,SLC1A2,PLXDC2,HIP1,MAN2A1,TMEM165,NFIA,GPC5,CLDN11,POLR2F,LINGO2,PDE1A,CRYAB,LDLRAD4,MBP,ZBTB20,ALCAM,CACNA2D1,DIP2B,B2M,QDPR,APLP1,IQCJ-SCHIP1,EDIL3,CTNNA3,FUT8,FOXN3,KLHL32,DOCK10,PEX5L,DSCAM,SHTN1,PLCL1,MBNL1,PDE8A,PTMA,TRIM2,ERBB4,PSAP,RALYL,ASIC2,FMNL2,BCAS3,TMEFF2,PPP3CA,QKI,NTM,SGK1,FTL	In_3/3_up		GO:CC	intercalated disc	GO:0014704	0.000476091	3.32231	52	41	4	18956	ANK2,AKAP6,TJP1,CTNNA3	Oli_3/3_down
REAC	Scavenging by Class A Receptors	REAC:R-HSA-3000480	0.000444733	3.3519	19	3	2	10627	APOE,FTL	Mic_3/3_up		GO:CC	cell-cell junction	GO:0005911	0.000509819	3.29258	502	41	8	18956	FRMD4B,PCDH9,ANK2,FRMD5,CNTNAP2,AKAP6,TJP1,CTNNA3	Oli_3/3_down
REAC	Binding and Uptake of Ligands by Scavenger Receptors	REAC:R-HSA-2173782	0.00488916	2.31077	97	3	2	10627	APOE,FTL	Mic_3/3_up		GO:CC	cation channel complex	GO:0034703	0.000509819	3.29258	225	41	6	18956	PDE4B,DLG2,GRIA2,CNTNAP2,SNAP25,AKAP6	Oli_3/3_down
REAC	Post-translational protein phosphorylation	REAC:R-HSA-8957275	0.00488916	2.31077	107	3	2	10627	SPP1,APOE	Mic_3/3_up		GO:CC	anchoring junction	GO:0070161	0.000509819	3.29258	840	41	10	18956	FRMD4B,PCDH9,ANK2,FRMD5,DMD,CNTNAP2,DLC1,AKAP6,TJP1,CTNNA3	Oli_3/3_down
REAC	Regulation of Insulin-like Growth Factor (IGF) transport and uptake by Insulin-like Growth Factor Binding Proteins (IGFBPs)	REAC:R-HSA-381426	0.00492568	2.30753	124	3	2	10627	SPP1,APOE	Mic_3/3_up		GO:CC	postsynapse	GO:0098794	0.00141411	2.84952	591	41	8	18956	PDE4B,ANK2,SH3GL3,DMD,DLG2,GRIA2,SNAP25,ADGRB3	Oli_3/3_down
GO:BP	nervous system development	GO:0007399	0.00170827	2.76744	2483	26	14	18017	TTLL7,LINGO1,SPP1,PLP1,ERBB4,NCAM2,MAN2A1,QKI,NTM,APLP1,LAMA2,KIRREL3,CNP,GPM6B	Oli_3/3_up		GO:CC	ion channel complex	GO:0034702	0.00150807	2.82158	300	41	6	18956	PDE4B,DLG2,GRIA2,CNTNAP2,SNAP25,AKAP6	Oli_3/3_down
GO:BP	cell development	GO:0048468	0.00182792	2.73804	2237	26	13	18017	LINGO1,SPP1,PLP1,ERBB4,SLC26A3,NCAM2,MAN2A1,QKI,NTM,LAMA2,KIRREL3,CNP,GPM6B	Oli_3/3_up		GO:CC	whole membrane	GO:0098805	0.00150807	2.82158	1731	41	13	18956	PPP2R2B,ANK2,SH3GL3,TMEM165,DMD,DLG2,SYT1,LDLRAD4,GRIA2,ATP8A1,DLC1,SNAP25,AKAP6	Oli_3/3_down
GO:BP	generation of neurons	GO:0048699	0.00208204	2.68151	1605	26	11	18017	LINGO1,SPP1,PLP1,ERBB4,NCAM2,MAN2A1,NTM,LAMA2,KIRREL3,CNP,GPM6B	Oli_3/3_up		GO:CC	transmembrane transporter complex	GO:1902495	0.00188664	2.72431	322	41	6	18956	PDE4B,DLG2,GRIA2,CNTNAP2,SNAP25,AKAP6	Oli_3/3_down
GO:BP	neurogenesis	GO:0022008	0.00288124	2.54042	1710	26	11	18017	LINGO1,SPP1,PLP1,ERBB4,NCAM2,MAN2A1,NTM,LAMA2,KIRREL3,CNP,GPM6B	Oli_3/3_up		GO:CC	transporter complex	GO:1990351	0.00196434	2.70678	330	41	6	18956	PDE4B,DLG2,GRIA2,CNTNAP2,SNAP25,AKAP6	Oli_3/3_down
GO:BP	neuron differentiation	GO:0030182	0.00344265	2.46311	1437	26	10	18017	LINGO1,SPP1,PLP1,ERBB4,NCAM2,NTM,LAMA2,KIRREL3,CNP,GPM6B	Oli_3/3_up		GO:CC	synaptic vesicle	GO:0008021	0.00212078	2.6735	209	41	5	18956	PDE4B,DMD,DLG2,SYT1,SNAP25	Oli_3/3_down
GO:BP	neuron development	GO:0048666	0.00389966	2.40897	1167	26	9	18017	LINGO1,SPP1,PLP1,NCAM2,NTM,LAMA2,KIRREL3,CNP,GPM6B	Oli_3/3_up		GO:CC	chromaffin granule membrane	GO:0042584	0.00221145	2.65532	7	41	2	18956	SYT1,ATP8A1	Oli_3/3_down
GO:BP	multicellular organism development	GO:0007275	0.00735398	2.13348	5638	26	18	18017	TTLL7,LINGO1,QDPR,SPP1,PLP1,ERBB4,NCAM2,MAN2A1,QKI,NTM,APLP1,LAMA2,KIRREL3,CNP,TF,EDIL3,GPM6B,N4BP2L2	Oli_3/3_up		GO:CC	excitatory synapse	GO:0060076	0.00235455	2.62809	44	41	3	18956	PDE4B,SYT1,GRIA2	Oli_3/3_down
GO:BP	axon development	GO:0061564	0.00735398	2.13348	533	26	6	18017	LINGO1,SPP1,PLP1,NCAM2,LAMA2,CNP	Oli_3/3_up		GO:CC	synaptic membrane	GO:0097060	0.00235455	2.62809	358	41	6	18956	ANK2,DMD,DLG2,SYT1,GRIA2,SNAP25	Oli_3/3_down
GO:BP	anatomical structure development	GO:0048856	0.00735398	2.13348	6143	26	19	18017	TTLL7,LINGO1,QDPR,SPP1,PLP1,ERBB4,SLC26A3,NCAM2,MAN2A1,QKI,NTM,APLP1,LAMA2,KIRREL3,CNP,TF,EDIL3,GPM6B,N4BP2L2	Oli_3/3_up		GO:CC	exocytic vesicle	GO:0070382	0.00239436	2.62081	228	41	5	18956	PDE4B,DMD,DLG2,SYT1,SNAP25	Oli_3/3_down
GO:BP	system development	GO:0048731	0.00735398	2.13348	5096	26	17	18017	TTLL7,LINGO1,QDPR,SPP1,PLP1,ERBB4,NCAM2,MAN2A1,QKI,NTM,APLP1,LAMA2,KIRREL3,CNP,TF,GPM6B,N4BP2L2	Oli_3/3_up		GO:CC	plasma membrane region	GO:0098590	0.00322903	2.49093	1213	41	10	18956	ANK2,DMD,DLG2,SYT1,GRIA2,CNTNAP2,DLC1,SNAP25,AKAP6,TJP1	Oli_3/3_down
GO:BP	cell differentiation	GO:0030154	0.00735398	2.13348	4388	26	16	18017	TTLL7,LINGO1,SPP1,PLP1,ERBB4,SLC26A3,NCAM2,MAN2A1,QKI,NTM,LAMA2,KIRREL3,CNP,TF,GPM6B,N4BP2L2	Oli_3/3_up		GO:CC	chromaffin granule	GO:0042583	0.00322903	2.49093	10	41	2	18956	SYT1,ATP8A1	Oli_3/3_down
GO:BP	neuron projection development	GO:0031175	0.00735398	2.13348	1030	26	8	18017	LINGO1,SPP1,PLP1,NCAM2,LAMA2,KIRREL3,CNP,GPM6B	Oli_3/3_up		GO:CC	juxtaparanode region of axon	GO:0044224	0.00322903	2.49093	10	41	2	18956	DLG2,CNTNAP2	Oli_3/3_down
GO:BP	cellular developmental process	GO:0048869	0.00735398	2.13348	4468	26	16	18017	TTLL7,LINGO1,SPP1,PLP1,ERBB4,SLC26A3,NCAM2,MAN2A1,QKI,NTM,LAMA2,KIRREL3,CNP,TF,GPM6B,N4BP2L2	Oli_3/3_up		GO:CC	synapse	GO:0045202	0.00506861	2.29511	1293	41	10	18956	PDE4B,ANK2,SH3GL3,PTPRD,DMD,DLG2,SYT1,GRIA2,SNAP25,ADGRB3	Oli_3/3_down
GO:BP	neural nucleus development	GO:0048857	0.00788579	2.10315	64	26	3	18017	PLP1,KIRREL3,CNP	Oli_3/3_up		GO:CC	asymmetric synapse	GO:0032279	0.00697893	2.15621	311	41	5	18956	PDE4B,SH3GL3,DMD,DLG2,GRIA2	Oli_3/3_down
KEGG	Mineral absorption	KEGG:04978	0.00147473	2.83129	59	10	3	7963	SLC26A3,TF,FTH1	Oli_3/3_up		GO:CC	adherens junction	GO:0005912	0.00697893	2.15621	173	41	4	18956	FRMD4B,FRMD5,TJP1,CTNNA3	Oli_3/3_down
WP	Glial Cell Differentiation	WP:WP2276	0.00252445	2.59783	8	11	2	7474	PLP1,CNP	Oli_3/3_up		GO:CC	postsynaptic density	GO:0014069	0.00697893	2.15621	305	41	5	18956	PDE4B,SH3GL3,DMD,DLG2,GRIA2	Oli_3/3_down
WP	Iron metabolism in placenta	WP:WP2007	0.0029657	2.52787	12	11	2	7474	TF,FTH1	Oli_3/3_up		GO:CC	postsynaptic specialization	GO:0099572	0.00796381	2.09888	328	41	5	18956	PDE4B,SH3GL3,DMD,DLG2,GRIA2	Oli_3/3_down
												GO:CC	neuron to neuron synapse	GO:0098984	0.00796381	2.09888	329	41	5	18956	PDE4B,SH3GL3,DMD,DLG2,GRIA2	Oli_3/3_down
												GO:CC	presynapse	GO:0098793	0.00796381	2.09888	502	41	6	18956	PDE4B,SH3GL3,DMD,DLG2,SYT1,SNAP25	Oli_3/3_down
												GO:CC	cytoskeleton	GO:0005856	0.00822422	2.08491	2291	41	13	18956	PPP2R2B,PDE4B,FRMD4B,ANK2,MOBP,FRMD5,DMD,SSH2,LIMCH1,DLC1,SNAP25,TJP1,CTNNA3	Oli_3/3_down
												GO:CC	costamere	GO:0043034	0.00822422	2.08491	19	41	2	18956	ANK2,DMD	Oli_3/3_down
												GO:CC	cell projection	GO:0042995	0.00977835	2.00973	2353	41	13	18956	PDE4B,FRMD4B,PCDH9,ANK2,DMD,DLG2,SYT1,GRIA2,CNTNAP2,DLC1,SNAP25,TJP1,CTNNA3	Oli_3/3_down
												GO:CC	voltage-gated potassium channel complex	GO:0008076	0.00977835	2.00973	90	41	3	18956	DLG2,CNTNAP2,SNAP25	Oli_3/3_down
												WP	G Protein Signaling Pathways	WP:WP35	0.00945845	2.02418	94	24	4	7474	PDE4B,PDE8A,PDE1A,AKAP6	Oli_3/3_down

## Sheet: Supplementary Table 7
Supplementary Table 7: Enriched disease pathways in APOE3/4 cells in the Prefrontal cortex
source	term_name	term_id	adjusted_p_value	negative_log10_of_adjusted_p_value	term_size	query_size	intersection_size	effective_domain_size	intersections	group		source	term_name	term_id	adjusted_p_value	negative_log10_of_adjusted_p_value	term_size	query_size	intersection_size	effective_domain_size	intersections	group
GO:CC	cell junction	GO:0030054	9.3374e-06	5.02977	2058	25	14	18956	CLU,DST,PNISR,DLG2,DTNA,CTNND2,DLC1,PSD3,CDH20,AHI1,NRCAM,DLGAP1,ARHGAP26,CACNB2	Ast_3/4_up		GO:MF	glutamate receptor activity	GO:0008066	0.00690683	2.16072	27	47	3	18602	GRM3,GRIK1,GRIN1	Ast_3/4_down
GO:CC	synapse	GO:0045202	0.00258153	2.58812	1293	25	9	18956	CLU,PNISR,DLG2,DTNA,CTNND2,PSD3,NRCAM,DLGAP1,CACNB2	Ast_3/4_up		GO:MF	very-low-density lipoprotein particle receptor binding	GO:0070326	0.00690683	2.16072	4	47	2	18602	APOE,RELN	Ast_3/4_down
GO:CC	plasma membrane bounded cell projection	GO:0120025	0.00440059	2.35649	2256	25	11	18956	CLU,DST,DLG2,CKB,MAPK10,DTNA,CTNND2,DLC1,PSD3,AHI1,NRCAM	Ast_3/4_up		GO:MF	calcium channel regulator activity	GO:0005246	0.0226217	1.64548	47	47	3	18602	GRM3,NRXN1,PRKCB	Ast_3/4_down
GO:CC	cell projection	GO:0042995	0.00488049	2.31154	2353	25	11	18956	CLU,DST,DLG2,CKB,MAPK10,DTNA,CTNND2,DLC1,PSD3,AHI1,NRCAM	Ast_3/4_up		GO:MF	structural constituent of myelin sheath	GO:0019911	0.0226217	1.64548	10	47	2	18602	MOBP,PLP1	Ast_3/4_down
GO:BP	nervous system development	GO:0007399	4.6191e-10	9.33544	2483	155	58	18017	ADGRV1,ERBB4,ASTN2,DLC1,CLDN11,B2M,PCDH15,LSAMP,DOCK10,PLP1,RELN,NRG1,ZNF536,APOE,DCC,SPP1,LAMA2,SPOCK1,LINGO1,MOBP,SLC1A3,CLMN,SGK1,DHFR,QKI,ABCA2,GRIK1,CLU,CNP,CNTN5,ASIC2,SLC1A2,ALCAM,GRIN1,MACROD2,SHTN1,LRRC4C,ROBO2,MBP,UNC5C,ZEB2,MAN2A1,GRID2,PTPRK,FRYL,SH3GL3,RORA,TNR,AGBL4,NCAM1,OPCML,ROBO1,TCF12,MACF1,NFIA,MEF2A,MAP4K4,CNTN1	Ex_3/4_up		GO:MF	transporter activity	GO:0005215	0.0456418	1.34064	1230	47	10	18602	APOE,PITPNC1,TMEM144,SLC1A2,KCNH8,GRIK1,ANO4,FAM155A,SLCO3A1,GRIN1	Ast_3/4_down
GO:BP	neurogenesis	GO:0022008	1.07939e-09	8.96682	1710	155	46	18017	ADGRV1,ERBB4,ASTN2,B2M,PCDH15,DOCK10,PLP1,RELN,NRG1,ZNF536,APOE,DCC,SPP1,LAMA2,SPOCK1,LINGO1,SLC1A3,CLMN,SGK1,DHFR,ABCA2,CLU,CNP,ALCAM,GRIN1,SHTN1,LRRC4C,ROBO2,UNC5C,ZEB2,MAN2A1,GRID2,PTPRK,FRYL,SH3GL3,RORA,TNR,AGBL4,NCAM1,OPCML,ROBO1,TCF12,MACF1,MEF2A,MAP4K4,CNTN1	Ex_3/4_up		GO:MF	signaling receptor binding	GO:0005102	0.0456418	1.34064	1674	47	12	18602	APOE,PLCL1,EDIL3,SPP1,HIP1,MTRNR2L12,RELN,TF,NRXN1,GRIN1,FGF14,PRKCB	Ast_3/4_down
GO:BP	neuron differentiation	GO:0030182	1.07939e-09	8.96682	1437	155	42	18017	ADGRV1,ERBB4,B2M,PCDH15,DOCK10,PLP1,RELN,NRG1,ZNF536,APOE,DCC,SPP1,LAMA2,SPOCK1,LINGO1,SLC1A3,CLMN,SGK1,DHFR,CNP,ALCAM,GRIN1,SHTN1,LRRC4C,ROBO2,UNC5C,ZEB2,GRID2,PTPRK,FRYL,SH3GL3,RORA,TNR,AGBL4,NCAM1,OPCML,ROBO1,TCF12,MACF1,MEF2A,MAP4K4,CNTN1	Ex_3/4_up		GO:MF	ionotropic glutamate receptor activity	GO:0004970	0.0484143	1.31503	19	47	2	18602	GRIK1,GRIN1	Ast_3/4_down
GO:BP	generation of neurons	GO:0048699	1.56916e-09	8.80433	1605	155	44	18017	ADGRV1,ERBB4,ASTN2,B2M,PCDH15,DOCK10,PLP1,RELN,NRG1,ZNF536,APOE,DCC,SPP1,LAMA2,SPOCK1,LINGO1,SLC1A3,CLMN,SGK1,DHFR,CNP,ALCAM,GRIN1,SHTN1,LRRC4C,ROBO2,UNC5C,ZEB2,MAN2A1,GRID2,PTPRK,FRYL,SH3GL3,RORA,TNR,AGBL4,NCAM1,OPCML,ROBO1,TCF12,MACF1,MEF2A,MAP4K4,CNTN1	Ex_3/4_up		GO:BP	chemical synaptic transmission	GO:0007268	1.38817e-05	4.85756	694	48	13	18017	APOE,PLCL1,CNP,GRM3,SLC1A2,RELN,GRIK1,PLP1,NRXN1,GRIN1,STXBP5L,FGF14,PRKCB	Ast_3/4_down
GO:BP	cell development	GO:0048468	3.68722e-09	8.4333	2237	155	52	18017	ADGRV1,SGCZ,ERBB4,SLC26A3,B2M,PCDH15,CHST11,DOCK10,PLP1,RELN,NRG1,ZNF536,APOE,DCC,SPP1,LAMA2,SPOCK1,LINGO1,DOCK5,SLC1A3,CLMN,SGK1,DHFR,QKI,ABCA2,CLU,CNP,PIP4K2A,ALCAM,GRIN1,TMEFF2,SHTN1,LRRC4C,ROBO2,UNC5C,ZEB2,MAN2A1,GRID2,PTPRK,FRYL,SH3GL3,TJP1,TNR,AGBL4,NCAM1,OPCML,ROBO1,TCF12,MACF1,MEF2A,MAP4K4,CNTN1	Ex_3/4_up		GO:BP	trans-synaptic signaling	GO:0099537	1.38817e-05	4.85756	702	48	13	18017	APOE,PLCL1,CNP,GRM3,SLC1A2,RELN,GRIK1,PLP1,NRXN1,GRIN1,STXBP5L,FGF14,PRKCB	Ast_3/4_down
GO:BP	neuron development	GO:0048666	6.6269e-09	8.17869	1167	155	36	18017	ADGRV1,B2M,PCDH15,DOCK10,PLP1,RELN,APOE,DCC,SPP1,LAMA2,SPOCK1,LINGO1,SLC1A3,CLMN,SGK1,DHFR,CNP,ALCAM,GRIN1,SHTN1,LRRC4C,ROBO2,UNC5C,ZEB2,GRID2,PTPRK,FRYL,TNR,AGBL4,NCAM1,OPCML,ROBO1,MACF1,MEF2A,MAP4K4,CNTN1	Ex_3/4_up		GO:BP	anterograde trans-synaptic signaling	GO:0098916	1.38817e-05	4.85756	694	48	13	18017	APOE,PLCL1,CNP,GRM3,SLC1A2,RELN,GRIK1,PLP1,NRXN1,GRIN1,STXBP5L,FGF14,PRKCB	Ast_3/4_down
GO:BP	neuron projection development	GO:0031175	1.80709e-08	7.74302	1030	155	33	18017	ADGRV1,B2M,PCDH15,DOCK10,PLP1,RELN,APOE,DCC,SPP1,LAMA2,SPOCK1,LINGO1,CLMN,SGK1,DHFR,CNP,ALCAM,GRIN1,SHTN1,LRRC4C,ROBO2,UNC5C,ZEB2,GRID2,PTPRK,FRYL,TNR,NCAM1,ROBO1,MACF1,MEF2A,MAP4K4,CNTN1	Ex_3/4_up		GO:BP	synaptic signaling	GO:0099536	1.49771e-05	4.82457	724	48	13	18017	APOE,PLCL1,CNP,GRM3,SLC1A2,RELN,GRIK1,PLP1,NRXN1,GRIN1,STXBP5L,FGF14,PRKCB	Ast_3/4_down
GO:BP	cell morphogenesis	GO:0000902	6.09505e-07	6.21502	1058	155	31	18017	DLC1,PCDH15,DOCK10,RELN,NRG1,APOE,DCC,SPP1,LAMA2,LINGO1,DOCK5,SLC1A3,SGK1,CDH20,CLU,CNP,ALCAM,GRIN1,TMEFF2,SHTN1,LRRC4C,ROBO2,UNC5C,ZEB2,FRYL,TNR,NCAM1,ROBO1,MACF1,MEF2A,MAP4K4	Ex_3/4_up		GO:BP	regulation of trans-synaptic signaling	GO:0099177	3.83276e-05	4.41649	421	48	10	18017	APOE,PLCL1,GRM3,RELN,GRIK1,NRXN1,GRIN1,STXBP5L,FGF14,PRKCB	Ast_3/4_down
GO:BP	cell morphogenesis involved in neuron differentiation	GO:0048667	5.45637e-06	5.2631	615	155	22	18017	PCDH15,DOCK10,RELN,APOE,DCC,SPP1,LAMA2,LINGO1,SLC1A3,CNP,ALCAM,GRIN1,SHTN1,LRRC4C,ROBO2,UNC5C,ZEB2,TNR,NCAM1,ROBO1,MACF1,MEF2A	Ex_3/4_up		GO:BP	modulation of chemical synaptic transmission	GO:0050804	3.83276e-05	4.41649	420	48	10	18017	APOE,PLCL1,GRM3,RELN,GRIK1,NRXN1,GRIN1,STXBP5L,FGF14,PRKCB	Ast_3/4_down
GO:BP	cell adhesion	GO:0007155	8.32007e-06	5.07987	1475	155	35	18017	ADGRV1,CTNNA3,ASTN2,DLC1,CLDN11,PCDH15,LSAMP,RELN,DOCK8,APBB1IP,SPP1,LAMA2,SPOCK1,DOCK5,CDH20,BCAS3,CNTN5,EDIL3,ALCAM,TMEFF2,LRRC4C,ROBO2,MBP,GRID2,PTPRK,TJP1,TNR,NCAM1,OPCML,ROBO1,PDZD2,MACF1,DST,MAP4K4,CNTN1	Ex_3/4_up		GO:BP	NMDA glutamate receptor clustering	GO:0097114	4.50093e-05	4.3467	5	48	3	18017	APOE,RELN,NRXN1	Ast_3/4_down
GO:BP	system development	GO:0048731	8.32007e-06	5.07987	5096	155	76	18017	ADGRV1,SGCZ,ERBB4,ASTN2,DLC1,CLDN11,B2M,PCDH15,SAT1,TF,CHST11,LSAMP,DOCK10,ARHGAP24,PLP1,RELN,NRG1,ZNF536,APOE,DCC,SPP1,LAMA2,SPOCK1,LINGO1,MOBP,KAZN,SLC1A3,CLMN,SGK1,FOXN3,DHFR,CRYAB,QKI,ABCA2,GRIK1,PHLPP1,CLU,CNP,BCAS3,CNTN5,ASIC2,SLC1A2,PIP4K2A,WWOX,ALCAM,GRIN1,TMEFF2,MACROD2,SHTN1,LRRC4C,ROBO2,MBP,QDPR,UNC5C,ZEB2,MAN2A1,RYR2,KIAA1217,GRID2,PTPRK,FRYL,SH3GL3,TJP1,RORA,TNR,AGBL4,NCAM1,OPCML,ROB…	Ex_3/4_up		GO:BP	neurotransmitter-gated ion channel clustering	GO:0072578	0.00125295	2.90207	14	48	3	18017	APOE,RELN,NRXN1	Ast_3/4_down
GO:BP	axon development	GO:0061564	8.32007e-06	5.07987	533	155	20	18017	PLP1,RELN,APOE,DCC,SPP1,LAMA2,LINGO1,DHFR,CNP,ALCAM,GRIN1,SHTN1,LRRC4C,ROBO2,UNC5C,ZEB2,TNR,NCAM1,ROBO1,MACF1	Ex_3/4_up		GO:BP	synaptic transmission, glutamatergic	GO:0035249	0.00125295	2.90207	97	48	5	18017	GRM3,RELN,GRIK1,NRXN1,GRIN1	Ast_3/4_down
GO:BP	biological adhesion	GO:0022610	8.32007e-06	5.07987	1482	155	35	18017	ADGRV1,CTNNA3,ASTN2,DLC1,CLDN11,PCDH15,LSAMP,RELN,DOCK8,APBB1IP,SPP1,LAMA2,SPOCK1,DOCK5,CDH20,BCAS3,CNTN5,EDIL3,ALCAM,TMEFF2,LRRC4C,ROBO2,MBP,GRID2,PTPRK,TJP1,TNR,NCAM1,OPCML,ROBO1,PDZD2,MACF1,DST,MAP4K4,CNTN1	Ex_3/4_up		GO:BP	glutamate receptor signaling pathway	GO:0007215	0.00138995	2.857	103	48	5	18017	GRM3,RELN,GRIK1,NRXN1,GRIN1	Ast_3/4_down
GO:BP	cell morphogenesis involved in differentiation	GO:0000904	8.75702e-06	5.05764	764	155	24	18017	PCDH15,DOCK10,RELN,APOE,DCC,SPP1,LAMA2,LINGO1,DOCK5,SLC1A3,CNP,ALCAM,GRIN1,TMEFF2,SHTN1,LRRC4C,ROBO2,UNC5C,ZEB2,TNR,NCAM1,ROBO1,MACF1,MEF2A	Ex_3/4_up		GO:BP	nervous system development	GO:0007399	0.0014045	2.85248	2483	48	19	18017	APOE,MOBP,SPP1,CNP,SLC1A2,ZNF536,MAN2A1,GAB1,RELN,GRIK1,DOCK10,TCF12,CLMN,PLP1,NRXN1,CSMD3,GRIN1,FGF14,LRFN5	Ast_3/4_down
GO:BP	neuron projection morphogenesis	GO:0048812	1.78364e-05	4.74869	678	155	22	18017	DOCK10,RELN,APOE,DCC,SPP1,LAMA2,LINGO1,SGK1,CNP,ALCAM,GRIN1,SHTN1,LRRC4C,ROBO2,UNC5C,ZEB2,TNR,NCAM1,ROBO1,MACF1,MEF2A,MAP4K4	Ex_3/4_up		GO:BP	cell-cell signaling	GO:0007267	0.00554896	2.25579	1806	48	15	18017	APOE,PLCL1,SPP1,CNP,GRM3,SLC1A2,RELN,GRIK1,PLP1,NRXN1,VSNL1,GRIN1,STXBP5L,FGF14,PRKCB	Ast_3/4_down
GO:BP	regulation of axonogenesis	GO:0050770	1.78364e-05	4.74869	189	155	12	18017	APOE,DCC,SPP1,LINGO1,GRIN1,SHTN1,LRRC4C,ROBO2,ZEB2,TNR,ROBO1,MACF1	Ex_3/4_up		GO:BP	regulation of postsynaptic membrane potential	GO:0060078	0.00554896	2.25579	147	48	5	18017	RELN,GRIK1,NRXN1,GRIN1,FGF14	Ast_3/4_down
GO:BP	plasma membrane bounded cell projection morphogenesis	GO:0120039	2.18117e-05	4.66131	692	155	22	18017	DOCK10,RELN,APOE,DCC,SPP1,LAMA2,LINGO1,SGK1,CNP,ALCAM,GRIN1,SHTN1,LRRC4C,ROBO2,UNC5C,ZEB2,TNR,NCAM1,ROBO1,MACF1,MEF2A,MAP4K4	Ex_3/4_up		GO:BP	regulation of synaptic transmission, glutamatergic	GO:0051966	0.00554896	2.25579	72	48	4	18017	GRM3,RELN,GRIK1,NRXN1	Ast_3/4_down
GO:BP	plasma membrane bounded cell projection organization	GO:0120036	2.18117e-05	4.66131	1567	155	35	18017	ADGRV1,B2M,PCDH15,DOCK10,ARHGAP24,PLP1,RELN,APOE,DCC,SPP1,LAMA2,SPOCK1,LINGO1,CLMN,SGK1,DHFR,CNP,BCAS3,ALCAM,GRIN1,SHTN1,LRRC4C,ROBO2,UNC5C,ZEB2,GRID2,PTPRK,FRYL,TNR,NCAM1,ROBO1,MACF1,MEF2A,MAP4K4,CNTN1	Ex_3/4_up		GO:BP	generation of neurons	GO:0048699	0.00589294	2.22967	1605	48	14	18017	APOE,SPP1,CNP,ZNF536,MAN2A1,GAB1,RELN,DOCK10,TCF12,CLMN,PLP1,NRXN1,CSMD3,GRIN1	Ast_3/4_down
GO:BP	cell projection morphogenesis	GO:0048858	2.28296e-05	4.6415	696	155	22	18017	DOCK10,RELN,APOE,DCC,SPP1,LAMA2,LINGO1,SGK1,CNP,ALCAM,GRIN1,SHTN1,LRRC4C,ROBO2,UNC5C,ZEB2,TNR,NCAM1,ROBO1,MACF1,MEF2A,MAP4K4	Ex_3/4_up		GO:BP	positive regulation of excitatory postsynaptic potential	GO:2000463	0.00617892	2.20909	28	48	3	18017	RELN,NRXN1,GRIN1	Ast_3/4_down
GO:BP	cell junction organization	GO:0034330	2.57747e-05	4.58881	703	155	22	18017	ERBB4,DLC1,CLDN11,DOCK10,RELN,NRG1,APOE,CDH20,BCAS3,CNTN5,ASIC2,GRIN1,LRRC4C,ROBO2,GRID2,PTPRK,TJP1,TNR,MACF1,DST,NFIA,MAP4K4	Ex_3/4_up		GO:BP	neuron projection development	GO:0031175	0.00677714	2.16895	1030	48	11	18017	APOE,SPP1,CNP,GAB1,RELN,DOCK10,CLMN,PLP1,NRXN1,CSMD3,GRIN1	Ast_3/4_down
GO:BP	cell projection organization	GO:0030030	3.10347e-05	4.50815	1608	155	35	18017	ADGRV1,B2M,PCDH15,DOCK10,ARHGAP24,PLP1,RELN,APOE,DCC,SPP1,LAMA2,SPOCK1,LINGO1,CLMN,SGK1,DHFR,CNP,BCAS3,ALCAM,GRIN1,SHTN1,LRRC4C,ROBO2,UNC5C,ZEB2,GRID2,PTPRK,FRYL,TNR,NCAM1,ROBO1,MACF1,MEF2A,MAP4K4,CNTN1	Ex_3/4_up		GO:BP	neuron differentiation	GO:0030182	0.0067773	2.16894	1437	48	13	18017	APOE,SPP1,CNP,ZNF536,GAB1,RELN,DOCK10,TCF12,CLMN,PLP1,NRXN1,CSMD3,GRIN1	Ast_3/4_down
GO:BP	axonogenesis	GO:0007409	3.10347e-05	4.50815	488	155	18	18017	RELN,APOE,DCC,SPP1,LAMA2,LINGO1,CNP,ALCAM,GRIN1,SHTN1,LRRC4C,ROBO2,UNC5C,ZEB2,TNR,NCAM1,ROBO1,MACF1	Ex_3/4_up		GO:BP	axon development	GO:0061564	0.00694454	2.15836	533	48	8	18017	APOE,SPP1,CNP,GAB1,RELN,PLP1,NRXN1,GRIN1	Ast_3/4_down
GO:BP	cell part morphogenesis	GO:0032990	3.10347e-05	4.50815	716	155	22	18017	DOCK10,RELN,APOE,DCC,SPP1,LAMA2,LINGO1,SGK1,CNP,ALCAM,GRIN1,SHTN1,LRRC4C,ROBO2,UNC5C,ZEB2,TNR,NCAM1,ROBO1,MACF1,MEF2A,MAP4K4	Ex_3/4_up		GO:BP	neurogenesis	GO:0022008	0.00882729	2.05417	1710	48	14	18017	APOE,SPP1,CNP,ZNF536,MAN2A1,GAB1,RELN,DOCK10,TCF12,CLMN,PLP1,NRXN1,CSMD3,GRIN1	Ast_3/4_down
GO:BP	multicellular organism development	GO:0007275	3.34216e-05	4.47597	5638	155	79	18017	TSHZ2,ADGRV1,SGCZ,ERBB4,ASTN2,DLC1,CLDN11,B2M,PCDH15,SAT1,TF,CHST11,LSAMP,DOCK10,ARHGAP24,PLP1,RELN,NRG1,ZNF536,APOE,DCC,SPP1,LAMA2,SPOCK1,LINGO1,MOBP,KAZN,SLC1A3,CLMN,SGK1,FOXN3,DHFR,CRYAB,QKI,ABCA2,GRIK1,PHLPP1,CLU,CNP,BCAS3,CNTN5,ASIC2,SLC1A2,EDIL3,PIP4K2A,WWOX,ALCAM,GRIN1,TMEFF2,MACROD2,SHTN1,LRRC4C,ROBO2,MBP,QDPR,UNC5C,ZEB2,MAN2A1,RYR2,FUT8,KIAA1217,GRID2,PTPRK,FRYL,SH3GL3,TJP1,RORA,TNR,AGBL…	Ex_3/4_up		GO:BP	synapse organization	GO:0050808	0.00909718	2.04109	417	48	7	18017	APOE,RELN,DOCK10,LRRTM4,NRXN1,GRIN1,LRFN5	Ast_3/4_down
GO:BP	central nervous system development	GO:0007417	4.86489e-05	4.31293	1065	155	27	18017	ERBB4,DLC1,B2M,PLP1,RELN,NRG1,DCC,SPOCK1,ABCA2,GRIK1,CLU,CNP,ASIC2,SLC1A2,GRIN1,MACROD2,ROBO2,MBP,UNC5C,ZEB2,GRID2,SH3GL3,RORA,TNR,AGBL4,ROBO1,CNTN1	Ex_3/4_up		GO:BP	ion transport	GO:0006811	0.00909718	2.04109	1730	48	14	18017	APOE,PITPNC1,SLC1A2,KCNH8,RELN,TF,GRIK1,ANO4,FAM155A,SLCO3A1,NRXN1,GRIN1,FGF14,PRKCB	Ast_3/4_down
GO:BP	regulation of neurogenesis	GO:0050767	4.86489e-05	4.31293	867	155	24	18017	ERBB4,B2M,RELN,NRG1,ZNF536,APOE,DCC,SPP1,SPOCK1,LINGO1,GRIN1,SHTN1,LRRC4C,ROBO2,ZEB2,MAN2A1,GRID2,SH3GL3,TNR,ROBO1,TCF12,MACF1,MAP4K4,CNTN1	Ex_3/4_up		GO:BP	long-term memory	GO:0007616	0.00922909	2.03484	36	48	3	18017	APOE,RELN,GRIN1	Ast_3/4_down
GO:BP	cellular component morphogenesis	GO:0032989	5.45626e-05	4.2631	812	155	23	18017	DOCK10,RELN,APOE,DCC,SPP1,LAMA2,LINGO1,SGK1,ABCA2,CNP,ALCAM,GRIN1,SHTN1,LRRC4C,ROBO2,UNC5C,ZEB2,TNR,NCAM1,ROBO1,MACF1,MEF2A,MAP4K4	Ex_3/4_up		GO:BP	regulation of NMDA receptor activity	GO:2000310	0.00960696	2.01741	37	48	3	18017	RELN,NRXN1,GRIN1	Ast_3/4_down
GO:BP	anatomical structure development	GO:0048856	5.45626e-05	4.2631	6143	155	83	18017	TSHZ2,ADGRV1,SGCZ,ERBB4,ASTN2,SLC26A3,DLC1,CLDN11,B2M,PCDH15,SAT1,TF,CHST11,LSAMP,DOCK10,ARHGAP24,PLP1,RELN,NRG1,ZNF536,APOE,DCC,SPP1,LAMA2,SPOCK1,LINGO1,DOCK5,MOBP,KAZN,SLC1A3,CLMN,SGK1,FOXN3,DHFR,CRYAB,QKI,ABCA2,CDH20,GRIK1,PHLPP1,CLU,CNP,BCAS3,CNTN5,ASIC2,SLC1A2,EDIL3,PIP4K2A,WWOX,ALCAM,GRIN1,TMEFF2,MACROD2,SHTN1,LRRC4C,ROBO2,MBP,QDPR,UNC5C,ZEB2,MAN2A1,RYR2,FUT8,KIAA1217,GRID2,PTPRK,FRYL,SH3GL…	Ex_3/4_up		GO:BP	postsynaptic membrane organization	GO:0001941	0.0116616	1.93324	40	48	3	18017	APOE,RELN,NRXN1	Ast_3/4_down
GO:BP	chemical synaptic transmission	GO:0007268	5.55611e-05	4.25523	694	155	21	18017	PLP1,RELN,APOE,DCC,LAMA2,FCHSD2,SLC1A3,GRIK1,CNP,KCNQ3,ASIC2,SLC1A2,GRIN1,LRRC4C,MBP,STXBP5L,SLC24A2,GRID2,PLCL1,TNR,GRM3	Ex_3/4_up		GO:BP	positive regulation of molecular function	GO:0044093	0.0124937	1.90331	1833	48	14	18017	APOE,PLCL1,ST18,HIP1,RELN,TF,DOCK10,DOCK8,SLCO3A1,NRXN1,GRIN1,STXBP5L,FGF14,PRKCB	Ast_3/4_down
GO:BP	anterograde trans-synaptic signaling	GO:0098916	5.55611e-05	4.25523	694	155	21	18017	PLP1,RELN,APOE,DCC,LAMA2,FCHSD2,SLC1A3,GRIK1,CNP,KCNQ3,ASIC2,SLC1A2,GRIN1,LRRC4C,MBP,STXBP5L,SLC24A2,GRID2,PLCL1,TNR,GRM3	Ex_3/4_up		GO:BP	regulation of nervous system development	GO:0051960	0.0124937	1.90331	978	48	10	18017	APOE,SPP1,ZNF536,MAN2A1,RELN,TCF12,NRXN1,CSMD3,GRIN1,LRFN5	Ast_3/4_down
GO:BP	regulation of neuron differentiation	GO:0045664	5.55611e-05	4.25523	693	155	21	18017	B2M,RELN,ZNF536,APOE,DCC,SPP1,SPOCK1,LINGO1,GRIN1,SHTN1,LRRC4C,ROBO2,ZEB2,GRID2,SH3GL3,TNR,ROBO1,TCF12,MACF1,MAP4K4,CNTN1	Ex_3/4_up		GO:BP	cell morphogenesis involved in neuron differentiation	GO:0048667	0.0124937	1.90331	615	48	8	18017	APOE,SPP1,CNP,GAB1,RELN,DOCK10,NRXN1,GRIN1	Ast_3/4_down
GO:BP	regulation of cell morphogenesis involved in differentiation	GO:0010769	5.55611e-05	4.25523	313	155	14	18017	RELN,APOE,DCC,SPP1,LINGO1,DOCK5,GRIN1,SHTN1,LRRC4C,ROBO2,ZEB2,TNR,ROBO1,MACF1	Ex_3/4_up		GO:BP	positive regulation of transport	GO:0051050	0.0124937	1.90331	961	48	10	18017	APOE,SPP1,HIP1,SLC1A2,RELN,TF,VSNL1,GRIN1,FGF14,PRKCB	Ast_3/4_down
GO:BP	trans-synaptic signaling	GO:0099537	6.41374e-05	4.19289	702	155	21	18017	PLP1,RELN,APOE,DCC,LAMA2,FCHSD2,SLC1A3,GRIK1,CNP,KCNQ3,ASIC2,SLC1A2,GRIN1,LRRC4C,MBP,STXBP5L,SLC24A2,GRID2,PLCL1,TNR,GRM3	Ex_3/4_up		GO:BP	neuron development	GO:0048666	0.0124937	1.90331	1167	48	11	18017	APOE,SPP1,CNP,GAB1,RELN,DOCK10,CLMN,PLP1,NRXN1,CSMD3,GRIN1	Ast_3/4_down
GO:BP	regulation of neuron projection development	GO:0010975	6.60685e-05	4.18001	528	155	18	18017	B2M,RELN,APOE,DCC,SPP1,SPOCK1,LINGO1,GRIN1,SHTN1,LRRC4C,ROBO2,ZEB2,GRID2,TNR,ROBO1,MACF1,MAP4K4,CNTN1	Ex_3/4_up		GO:BP	positive regulation of synapse maturation	GO:0090129	0.013364	1.87406	9	48	2	18017	RELN,NRXN1	Ast_3/4_down
GO:BP	regulation of nervous system development	GO:0051960	8.75612e-05	4.05769	978	155	25	18017	ERBB4,B2M,RELN,NRG1,ZNF536,APOE,DCC,SPP1,SPOCK1,LINGO1,ASIC2,GRIN1,SHTN1,LRRC4C,ROBO2,ZEB2,MAN2A1,GRID2,SH3GL3,TNR,ROBO1,TCF12,MACF1,MAP4K4,CNTN1	Ex_3/4_up		GO:BP	postsynaptic density protein 95 clustering	GO:0097119	0.013364	1.87406	9	48	2	18017	RELN,NRXN1	Ast_3/4_down
GO:BP	synaptic signaling	GO:0099536	9.66028e-05	4.01501	724	155	21	18017	PLP1,RELN,APOE,DCC,LAMA2,FCHSD2,SLC1A3,GRIK1,CNP,KCNQ3,ASIC2,SLC1A2,GRIN1,LRRC4C,MBP,STXBP5L,SLC24A2,GRID2,PLCL1,TNR,GRM3	Ex_3/4_up		GO:BP	regulation of synapse organization	GO:0050807	0.013364	1.87406	214	48	5	18017	APOE,RELN,NRXN1,GRIN1,LRFN5	Ast_3/4_down
GO:BP	cell junction assembly	GO:0034329	9.82454e-05	4.00769	435	155	16	18017	ERBB4,DLC1,CLDN11,NRG1,CDH20,BCAS3,CNTN5,ASIC2,GRIN1,ROBO2,GRID2,PTPRK,TJP1,MACF1,DST,MAP4K4	Ex_3/4_up		GO:BP	modulation of excitatory postsynaptic potential	GO:0098815	0.013364	1.87406	46	48	3	18017	RELN,NRXN1,GRIN1	Ast_3/4_down
GO:BP	regulation of cell development	GO:0060284	0.000134501	3.87127	1006	155	25	18017	ERBB4,B2M,RELN,NRG1,ZNF536,APOE,DCC,SPP1,SPOCK1,LINGO1,DOCK5,GRIN1,SHTN1,LRRC4C,ROBO2,ZEB2,MAN2A1,GRID2,SH3GL3,TNR,ROBO1,TCF12,MACF1,MAP4K4,CNTN1	Ex_3/4_up		GO:BP	axonogenesis	GO:0007409	0.0146806	1.83326	488	48	7	18017	APOE,SPP1,CNP,GAB1,RELN,NRXN1,GRIN1	Ast_3/4_down
GO:BP	anatomical structure morphogenesis	GO:0009653	0.000139716	3.85475	2849	155	48	18017	ERBB4,ASTN2,DLC1,PCDH15,SAT1,CHST11,DOCK10,ARHGAP24,RELN,NRG1,APOE,DCC,SPP1,LAMA2,LINGO1,DOCK5,SLC1A3,SGK1,FOXN3,CRYAB,QKI,ABCA2,CDH20,CLU,CNP,BCAS3,WWOX,ALCAM,GRIN1,TMEFF2,SHTN1,LRRC4C,ROBO2,MBP,UNC5C,ZEB2,MAN2A1,RYR2,GRID2,FRYL,TJP1,RORA,TNR,NCAM1,ROBO1,MACF1,MEF2A,MAP4K4	Ex_3/4_up		GO:BP	regulation of synapse structure or activity	GO:0050803	0.0159028	1.79853	225	48	5	18017	APOE,RELN,NRXN1,GRIN1,LRFN5	Ast_3/4_down
GO:BP	regulation of plasma membrane bounded cell projection organization	GO:0120035	0.000234877	3.62916	707	155	20	18017	B2M,ARHGAP24,RELN,APOE,DCC,SPP1,SPOCK1,LINGO1,BCAS3,GRIN1,SHTN1,LRRC4C,ROBO2,ZEB2,GRID2,TNR,ROBO1,MACF1,MAP4K4,CNTN1	Ex_3/4_up		GO:BP	neuron projection morphogenesis	GO:0048812	0.0184951	1.73294	678	48	8	18017	APOE,SPP1,CNP,GAB1,RELN,DOCK10,NRXN1,GRIN1	Ast_3/4_down
GO:BP	regulation of cell projection organization	GO:0031344	0.000283099	3.54806	717	155	20	18017	B2M,ARHGAP24,RELN,APOE,DCC,SPP1,SPOCK1,LINGO1,BCAS3,GRIN1,SHTN1,LRRC4C,ROBO2,ZEB2,GRID2,TNR,ROBO1,MACF1,MAP4K4,CNTN1	Ex_3/4_up		GO:BP	plasma membrane bounded cell projection morphogenesis	GO:0120039	0.0206377	1.68534	692	48	8	18017	APOE,SPP1,CNP,GAB1,RELN,DOCK10,NRXN1,GRIN1	Ast_3/4_down
GO:BP	developmental process	GO:0032502	0.000357781	3.44638	6676	155	85	18017	TSHZ2,ADGRV1,SGCZ,ERBB4,ASTN2,SLC26A3,DLC1,CLDN11,B2M,PCDH15,SAT1,TF,CHST11,HIP1,LSAMP,DOCK10,ARHGAP24,POLR2F,PLP1,RELN,NRG1,ZNF536,APOE,DCC,SPP1,LAMA2,SPOCK1,LINGO1,DOCK5,MOBP,KAZN,SLC1A3,CLMN,SGK1,FOXN3,DHFR,CRYAB,QKI,ABCA2,CDH20,GRIK1,PHLPP1,CLU,CNP,BCAS3,CNTN5,ASIC2,SLC1A2,EDIL3,PIP4K2A,WWOX,ALCAM,GRIN1,TMEFF2,MACROD2,SHTN1,LRRC4C,ROBO2,MBP,QDPR,UNC5C,ZEB2,MAN2A1,RYR2,FUT8,KIAA1217,GRID2,PTPR…	Ex_3/4_up		GO:BP	cell projection morphogenesis	GO:0048858	0.0208941	1.67998	696	48	8	18017	APOE,SPP1,CNP,GAB1,RELN,DOCK10,NRXN1,GRIN1	Ast_3/4_down
GO:BP	negative regulation of amyloid fibril formation	GO:1905907	0.000465374	3.3322	5	155	3	18017	APOE,CRYAB,CLU	Ex_3/4_up		GO:BP	receptor clustering	GO:0043113	0.0209103	1.67964	57	48	3	18017	APOE,RELN,NRXN1	Ast_3/4_down
GO:BP	negative regulation of cellular component organization	GO:0051129	0.000515426	3.28783	750	155	20	18017	DLC1,B2M,ARHGAP24,APOE,DCC,SPP1,SPOCK1,LINGO1,CRYAB,ABCA2,CLU,BCAS3,TMEFF2,ROBO2,SSH2,SH3GL3,TJP1,TNR,IQCJ-SCHIP1,MAP4K4	Ex_3/4_up		GO:BP	cell development	GO:0048468	0.0210167	1.67744	2237	48	15	18017	APOE,SPP1,CNP,ZNF536,MAN2A1,GAB1,RELN,PIP4K2A,DOCK10,TCF12,CLMN,PLP1,NRXN1,CSMD3,GRIN1	Ast_3/4_down
GO:BP	central nervous system neuron differentiation	GO:0021953	0.00072536	3.13945	202	155	10	18017	ERBB4,B2M,DCC,SPOCK1,ROBO2,ZEB2,GRID2,RORA,AGBL4,ROBO1	Ex_3/4_up		GO:BP	adult behavior	GO:0030534	0.022167	1.65429	142	48	4	18017	CNP,SLC1A2,NRXN1,GRIN1	Ast_3/4_down
GO:BP	modulation of chemical synaptic transmission	GO:0050804	0.00116297	2.93443	420	155	14	18017	RELN,APOE,DCC,LAMA2,SLC1A3,GRIK1,GRIN1,LRRC4C,STXBP5L,SLC24A2,GRID2,PLCL1,TNR,GRM3	Ex_3/4_up		GO:BP	cell part morphogenesis	GO:0032990	0.022167	1.65429	716	48	8	18017	APOE,SPP1,CNP,GAB1,RELN,DOCK10,NRXN1,GRIN1	Ast_3/4_down
GO:BP	regulation of trans-synaptic signaling	GO:0099177	0.00116873	2.93229	421	155	14	18017	RELN,APOE,DCC,LAMA2,SLC1A3,GRIK1,GRIN1,LRRC4C,STXBP5L,SLC24A2,GRID2,PLCL1,TNR,GRM3	Ex_3/4_up		GO:BP	dendrite development	GO:0016358	0.022167	1.65429	251	48	5	18017	APOE,RELN,DOCK10,CSMD3,GRIN1	Ast_3/4_down
GO:BP	amyloid fibril formation	GO:1990000	0.00124853	2.9036	19	155	4	18017	B2M,APOE,CRYAB,CLU	Ex_3/4_up		GO:BP	regulation of vesicle-mediated transport	GO:0060627	0.022167	1.65429	545	48	7	18017	APOE,HIP1,TF,VSNL1,STXBP5L,FGF14,PRKCB	Ast_3/4_down
GO:BP	negative regulation of nervous system development	GO:0051961	0.00182091	2.73971	328	155	12	18017	ERBB4,B2M,NRG1,ZNF536,APOE,DCC,SPP1,SPOCK1,LINGO1,ROBO2,TNR,MAP4K4	Ex_3/4_up		GO:BP	regulation of cell communication	GO:0010646	0.0234292	1.63024	3659	48	20	18017	APOE,PLCL1,PHLPP1,ST18,SPP1,HIP1,GRM3,MTRNR2L12,ZNF536,GAB1,RELN,TF,GRIK1,PIP4K2A,NRXN1,VSNL1,GRIN1,STXBP5L,FGF14,PRKCB	Ast_3/4_down
GO:BP	regulation of cell morphogenesis	GO:0022604	0.00207942	2.68206	506	155	15	18017	DLC1,RELN,APOE,DCC,SPP1,LINGO1,DOCK5,GRIN1,SHTN1,LRRC4C,ROBO2,ZEB2,TNR,ROBO1,MACF1	Ex_3/4_up		GO:BP	regulation of synapse maturation	GO:0090128	0.0234952	1.62902	14	48	2	18017	RELN,NRXN1	Ast_3/4_down
GO:BP	regulation of amyloid fibril formation	GO:1905906	0.00215589	2.66637	8	155	3	18017	APOE,CRYAB,CLU	Ex_3/4_up		GO:BP	prepulse inhibition	GO:0060134	0.0249411	1.60308	15	48	2	18017	NRXN1,GRIN1	Ast_3/4_down
GO:BP	regulation of localization	GO:0032879	0.00243159	2.61411	2913	155	45	18017	GPC5,CTNNA3,ERBB4,ASTN2,DLC1,B2M,TF,HIP1,DOCK10,KCNH8,RELN,NRG1,DOCK8,APOE,ITPR2,SPP1,LAMA2,DOCK5,SPOCK3,SGK1,CRYAB,ABCA2,CLU,KCNQ3,BCAS3,ASIC2,SLC1A2,GRIN1,TMEFF2,SHTN1,SSH2,UNC5C,RYR2,STXBP5L,PTPRK,SH3GL3,TJP1,ROBO1,FRMD4A,CACNA2D3,MACF1,MEF2A,NKAIN2,MAP4K4,CNTN1	Ex_3/4_up		GO:BP	regulation of signaling	GO:0023051	0.0249411	1.60308	3699	48	20	18017	APOE,PLCL1,PHLPP1,ST18,SPP1,HIP1,GRM3,MTRNR2L12,ZNF536,GAB1,RELN,TF,GRIK1,PIP4K2A,NRXN1,VSNL1,GRIN1,STXBP5L,FGF14,PRKCB	Ast_3/4_down
GO:BP	negative regulation of cell projection organization	GO:0031345	0.00244478	2.61176	190	155	9	18017	B2M,ARHGAP24,APOE,DCC,SPP1,SPOCK1,LINGO1,TNR,MAP4K4	Ex_3/4_up		GO:BP	positive regulation of nervous system process	GO:0031646	0.0249411	1.60308	65	48	3	18017	RELN,NRXN1,GRIN1	Ast_3/4_down
GO:BP	regulation of cellular component movement	GO:0051270	0.00254317	2.59463	1142	155	24	18017	CTNNA3,ERBB4,DLC1,TF,DOCK10,RELN,NRG1,DOCK8,APOE,LAMA2,DOCK5,SPOCK3,SGK1,BCAS3,TMEFF2,SHTN1,SSH2,UNC5C,RYR2,PTPRK,TJP1,ROBO1,MACF1,MAP4K4	Ex_3/4_up		GO:BP	regulation of glutamate receptor signaling pathway	GO:1900449	0.0249411	1.60308	65	48	3	18017	RELN,NRXN1,GRIN1	Ast_3/4_down
GO:BP	brain development	GO:0007420	0.00265077	2.57663	784	155	19	18017	ERBB4,DLC1,B2M,PLP1,RELN,NRG1,CNP,SLC1A2,GRIN1,MACROD2,ROBO2,MBP,UNC5C,ZEB2,GRID2,RORA,TNR,ROBO1,CNTN1	Ex_3/4_up		GO:BP	postsynapse organization	GO:0099173	0.0261754	1.58211	155	48	4	18017	APOE,RELN,DOCK10,NRXN1	Ast_3/4_down
GO:BP	cell differentiation	GO:0030154	0.00280183	2.55256	4388	155	60	18017	ADGRV1,SGCZ,ERBB4,ASTN2,SLC26A3,B2M,PCDH15,TF,CHST11,HIP1,DOCK10,ARHGAP24,PLP1,RELN,NRG1,ZNF536,APOE,DCC,SPP1,LAMA2,SPOCK1,LINGO1,DOCK5,KAZN,SLC1A3,CLMN,SGK1,DHFR,QKI,ABCA2,CLU,CNP,PIP4K2A,WWOX,ALCAM,GRIN1,TMEFF2,SHTN1,LRRC4C,ROBO2,UNC5C,ZEB2,MAN2A1,GRID2,PTPRK,FRYL,SH3GL3,TJP1,RORA,TNR,AGBL4,NCAM1,OPCML,ROBO1,TCF12,MACF1,MEF2A,N4BP2L2,MAP4K4,CNTN1	Ex_3/4_up		GO:BP	membrane organization	GO:0061024	0.0262668	1.58059	948	48	9	18017	APOE,PITPNC1,CNP,HIP1,RELN,TF,ANO4,NRXN1,PRKCB	Ast_3/4_down
GO:BP	regulation of cell junction assembly	GO:1901888	0.00301259	2.52106	197	155	9	18017	DLC1,BCAS3,ASIC2,GRIN1,ROBO2,GRID2,TJP1,MACF1,MAP4K4	Ex_3/4_up		GO:BP	regulation of dendrite development	GO:0050773	0.0264426	1.5777	157	48	4	18017	APOE,RELN,CSMD3,GRIN1	Ast_3/4_down
GO:BP	multicellular organismal process	GO:0032501	0.00329492	2.48216	7992	155	93	18017	TSHZ2,ADGRV1,SGCZ,CTNNA3,ERBB4,ASTN2,SLC26A3,DLC1,CLDN11,B2M,PCDH15,SAT1,TF,CHST11,LSAMP,DOCK10,LHFPL3,ARHGAP24,POLR2F,PLP1,RELN,NRG1,ZNF536,ZBTB20,DOCK8,APOE,DCC,ITPR2,SPP1,PTGDS,LAMA2,SPOCK1,LINGO1,DOCK5,MOBP,KAZN,SLC1A3,CLMN,SGK1,FOXN3,DHFR,CRYAB,QKI,ABCA2,GRIK1,PHLPP1,CLU,CNP,PDE1C,BCAS3,CNTN5,ASIC2,SLCO3A1,SLC1A2,EDIL3,PIP4K2A,WWOX,ALCAM,GRIN1,TMEFF2,MACROD2,SHTN1,LRRC4C,ROBO2,MBP,QDPR,UNC5C…	Ex_3/4_up		GO:BP	regulation of behavior	GO:0050795	0.0272727	1.56427	70	48	3	18017	APOE,RELN,NRXN1	Ast_3/4_down
GO:BP	negative regulation of neuron projection development	GO:0010977	0.00329492	2.48216	156	155	8	18017	B2M,APOE,DCC,SPP1,SPOCK1,LINGO1,TNR,MAP4K4	Ex_3/4_up		GO:BP	cell morphogenesis involved in differentiation	GO:0000904	0.0272727	1.56427	764	48	8	18017	APOE,SPP1,CNP,GAB1,RELN,DOCK10,NRXN1,GRIN1	Ast_3/4_down
GO:BP	regulation of locomotion	GO:0040012	0.00329492	2.48216	1094	155	23	18017	ERBB4,DLC1,TF,DOCK10,RELN,NRG1,DOCK8,APOE,LAMA2,DOCK5,SPOCK3,SGK1,BCAS3,TMEFF2,SHTN1,ROBO2,SSH2,UNC5C,PTPRK,TJP1,ROBO1,MACF1,MAP4K4	Ex_3/4_up		GO:BP	regulation of transmembrane transport	GO:0034762	0.0276666	1.55804	589	48	7	18017	SLC1A2,KCNH8,RELN,NRXN1,GRIN1,FGF14,PRKCB	Ast_3/4_down
GO:BP	positive regulation of multicellular organismal process	GO:0051240	0.00329492	2.48216	1894	155	33	18017	ADGRV1,ERBB4,B2M,TF,POLR2F,RELN,NRG1,ZBTB20,APOE,SPP1,DOCK5,CLU,BCAS3,ASIC2,GRIN1,SHTN1,ROBO2,MBP,ZEB2,MAN2A1,RYR2,GRID2,SH3GL3,TJP1,RORA,TNR,ROBO1,TCF12,MACF1,MEF2A,N4BP2L2,MAP4K4,CNTN1	Ex_3/4_up		GO:BP	transmembrane transport	GO:0055085	0.0284729	1.54557	1632	48	12	18017	TMEM144,SLC1A2,KCNH8,RELN,GRIK1,ANO4,FAM155A,SLCO3A1,NRXN1,GRIN1,FGF14,PRKCB	Ast_3/4_down
GO:BP	negative regulation of neurogenesis	GO:0050768	0.00336031	2.47362	303	155	11	18017	ERBB4,B2M,NRG1,ZNF536,APOE,DCC,SPP1,SPOCK1,LINGO1,TNR,MAP4K4	Ex_3/4_up		GO:BP	regulation of signaling receptor activity	GO:0010469	0.0284729	1.54557	164	48	4	18017	MTRNR2L12,RELN,NRXN1,GRIN1	Ast_3/4_down
GO:BP	synapse organization	GO:0050808	0.00341293	2.46687	417	155	13	18017	ERBB4,DOCK10,RELN,NRG1,APOE,CNTN5,ASIC2,GRIN1,LRRC4C,ROBO2,GRID2,TNR,NFIA	Ex_3/4_up		GO:BP	regulation of neurotransmitter receptor activity	GO:0099601	0.0294292	1.53122	74	48	3	18017	RELN,NRXN1,GRIN1	Ast_3/4_down
GO:BP	sensory perception of sound	GO:0007605	0.00359153	2.44472	159	155	8	18017	ADGRV1,PCDH15,LHFPL3,SLC1A3,CNTN5,ASIC2,MBP,TJP1	Ex_3/4_up		GO:BP	regulation of transport	GO:0051049	0.0294292	1.53122	1887	48	13	18017	APOE,SPP1,HIP1,SLC1A2,KCNH8,RELN,TF,NRXN1,VSNL1,GRIN1,STXBP5L,FGF14,PRKCB	Ast_3/4_down
GO:BP	negative regulation of negative chemotaxis	GO:0050925	0.00367124	2.43519	2	155	2	18017	ROBO2,ROBO1	Ex_3/4_up		GO:BP	system development	GO:0048731	0.0317206	1.49866	5096	48	24	18017	APOE,PHLPP1,MOBP,SPP1,CNP,SLC1A2,ZNF536,MAN2A1,GAB1,RELN,TF,GRIK1,PIP4K2A,DOCK10,TCF12,QDPR,CLMN,PLP1,NRXN1,CSMD3,GRIN1,FGF14,LRFN5,PRKCB	Ast_3/4_down
GO:BP	cellular developmental process	GO:0048869	0.00413111	2.38393	4468	155	60	18017	ADGRV1,SGCZ,ERBB4,ASTN2,SLC26A3,B2M,PCDH15,TF,CHST11,HIP1,DOCK10,ARHGAP24,PLP1,RELN,NRG1,ZNF536,APOE,DCC,SPP1,LAMA2,SPOCK1,LINGO1,DOCK5,KAZN,SLC1A3,CLMN,SGK1,DHFR,QKI,ABCA2,CLU,CNP,PIP4K2A,WWOX,ALCAM,GRIN1,TMEFF2,SHTN1,LRRC4C,ROBO2,UNC5C,ZEB2,MAN2A1,GRID2,PTPRK,FRYL,SH3GL3,TJP1,RORA,TNR,AGBL4,NCAM1,OPCML,ROBO1,TCF12,MACF1,MEF2A,N4BP2L2,MAP4K4,CNTN1	Ex_3/4_up		GO:BP	regulation of biological quality	GO:0065008	0.0317206	1.49866	4133	48	21	18017	APOE,PLCL1,C10ORF90,SPP1,CNP,HIP1,KCNH8,RELN,TF,GRIK1,DOCK10,ANO4,DOCK8,FAM155A,NRXN1,VSNL1,GRIN1,STXBP5L,FGF14,LRFN5,PRKCB	Ast_3/4_down
GO:BP	locomotion	GO:0040011	0.00430948	2.36558	2020	155	34	18017	GPC5,ERBB4,ASTN2,DLC1,TF,DOCK10,ARHGAP24,RELN,NRG1,DOCK8,APOE,DCC,LAMA2,SPOCK1,DOCK5,SPOCK3,SGK1,BCAS3,ALCAM,TMEFF2,SHTN1,ROBO2,SSH2,UNC5C,ZEB2,FUT8,PTPRK,TJP1,TNR,NCAM1,ROBO1,MACF1,DST,MAP4K4	Ex_3/4_up		GO:BP	positive regulation of synaptic transmission	GO:0050806	0.0317206	1.49866	172	48	4	18017	APOE,RELN,NRXN1,GRIN1	Ast_3/4_down
GO:BP	head development	GO:0060322	0.00449836	2.34695	829	155	19	18017	ERBB4,DLC1,B2M,PLP1,RELN,NRG1,CNP,SLC1A2,GRIN1,MACROD2,ROBO2,MBP,UNC5C,ZEB2,GRID2,RORA,TNR,ROBO1,CNTN1	Ex_3/4_up		GO:BP	protein localization to synapse	GO:0035418	0.0317206	1.49866	78	48	3	18017	RELN,NRXN1,GRIN1	Ast_3/4_down
GO:BP	regulation of cell motility	GO:2000145	0.00462128	2.33524	1052	155	22	18017	ERBB4,DLC1,TF,DOCK10,RELN,NRG1,DOCK8,APOE,LAMA2,DOCK5,SPOCK3,SGK1,BCAS3,TMEFF2,SHTN1,SSH2,UNC5C,PTPRK,TJP1,ROBO1,MACF1,MAP4K4	Ex_3/4_up		GO:BP	regulation of membrane potential	GO:0042391	0.0317206	1.49866	449	48	6	18017	KCNH8,RELN,GRIK1,NRXN1,GRIN1,FGF14	Ast_3/4_down
GO:BP	movement of cell or subcellular component	GO:0006928	0.00487227	2.31227	2301	155	37	18017	GPC5,CTNNA3,ERBB4,ASTN2,DLC1,TF,DOCK10,ARHGAP24,RELN,NRG1,DOCK8,APOE,DCC,LAMA2,SPOCK1,DOCK5,SPOCK3,SGK1,BCAS3,ALCAM,TMEFF2,SHTN1,ROBO2,SSH2,UNC5C,ZEB2,RYR2,FUT8,PTPRK,TJP1,TNR,AGBL4,NCAM1,ROBO1,MACF1,DST,MAP4K4	Ex_3/4_up		GO:BP	positive regulation of bone remodeling	GO:0046852	0.0321442	1.4929	20	48	2	18017	SPP1,TF	Ast_3/4_down
GO:BP	olfactory bulb interneuron differentiation	GO:0021889	0.0059316	2.22683	12	155	3	18017	ERBB4,ROBO2,ROBO1	Ex_3/4_up		GO:BP	cell communication	GO:0007154	0.0321442	1.4929	6828	48	29	18017	APOE,PITPNC1,PLCL1,PHLPP1,ST18,SPP1,PDE1C,CNP,HIP1,GRM3,SLC1A2,MTRNR2L12,ZNF536,GAB1,RELN,TF,GRIK1,PIP4K2A,DOCK10,APBB1IP,DOCK8,PLP1,NRXN1,SNTG1,VSNL1,GRIN1,STXBP5L,FGF14,PRKCB	Ast_3/4_down
GO:BP	signaling	GO:0023052	0.00712912	2.14696	6814	155	81	18017	RASGEF1B,ADGRV1,GPC5,CTNNA3,ERBB4,DLC1,MTRNR2L8,MTRNR2L12,B2M,TF,CHST11,HIP1,DOCK10,MAML2,ARHGAP24,POLR2F,PLP1,RELN,NRG1,ZNF536,ST18,DOCK8,APOE,APBB1IP,DCC,ITPR2,SPP1,LAMA2,FCHSD2,DOCK5,SLC1A3,SGK1,CRYAB,PDE8A,GRIK1,PHLPP1,CLU,CNP,PDE1C,KCNQ3,ASIC2,PDE1A,RNF220,SLC1A2,FHIT,PITPNC1,PIP4K2A,WWOX,ALCAM,GRIN1,SHTN1,LRRC4C,MAPK10,ROBO2,MBP,UNC5C,ZEB2,RYR2,STXBP5L,FUT8,SLC24A2,GRID2,PLCL1,PTPRK,SH3GL3,…	Ex_3/4_up		GO:BP	positive regulation of bone resorption	GO:0045780	0.0321442	1.4929	20	48	2	18017	SPP1,TF	Ast_3/4_down
GO:BP	negative regulation of neuron differentiation	GO:0045665	0.00712912	2.14696	229	155	9	18017	B2M,ZNF536,APOE,DCC,SPP1,SPOCK1,LINGO1,TNR,MAP4K4	Ex_3/4_up		GO:BP	cellular component morphogenesis	GO:0032989	0.0321442	1.4929	812	48	8	18017	APOE,SPP1,CNP,GAB1,RELN,DOCK10,NRXN1,GRIN1	Ast_3/4_down
GO:BP	sensory perception of mechanical stimulus	GO:0050954	0.00712912	2.14696	180	155	8	18017	ADGRV1,PCDH15,LHFPL3,SLC1A3,CNTN5,ASIC2,MBP,TJP1	Ex_3/4_up		GO:BP	synaptic vesicle cycle	GO:0099504	0.0321442	1.4929	177	48	4	18017	NRXN1,STXBP5L,FGF14,PRKCB	Ast_3/4_down
GO:BP	cell motility	GO:0048870	0.00712912	2.14696	1823	155	31	18017	GPC5,ERBB4,ASTN2,DLC1,TF,DOCK10,ARHGAP24,RELN,NRG1,DOCK8,APOE,DCC,LAMA2,SPOCK1,DOCK5,SPOCK3,SGK1,BCAS3,TMEFF2,SHTN1,SSH2,UNC5C,ZEB2,FUT8,PTPRK,TJP1,TNR,ROBO1,MACF1,DST,MAP4K4	Ex_3/4_up		GO:BP	synaptic membrane adhesion	GO:0099560	0.0344958	1.46223	21	48	2	18017	NRXN1,LRFN5	Ast_3/4_down
GO:BP	localization of cell	GO:0051674	0.00712912	2.14696	1823	155	31	18017	GPC5,ERBB4,ASTN2,DLC1,TF,DOCK10,ARHGAP24,RELN,NRG1,DOCK8,APOE,DCC,LAMA2,SPOCK1,DOCK5,SPOCK3,SGK1,BCAS3,TMEFF2,SHTN1,SSH2,UNC5C,ZEB2,FUT8,PTPRK,TJP1,TNR,ROBO1,MACF1,DST,MAP4K4	Ex_3/4_up		GO:BP	dendritic spine organization	GO:0097061	0.0344958	1.46223	83	48	3	18017	APOE,RELN,DOCK10	Ast_3/4_down
GO:BP	netrin-activated signaling pathway	GO:0038007	0.00712912	2.14696	13	155	3	18017	DCC,SHTN1,UNC5C	Ex_3/4_up		GO:BP	regulation of cation channel activity	GO:2001257	0.0368653	1.43338	187	48	4	18017	RELN,NRXN1,GRIN1,FGF14	Ast_3/4_down
GO:BP	cell communication	GO:0007154	0.00760862	2.11869	6828	155	81	18017	RASGEF1B,ADGRV1,GPC5,CTNNA3,ERBB4,DLC1,MTRNR2L8,MTRNR2L12,B2M,TF,CHST11,SNTG1,HIP1,DOCK10,MAML2,ARHGAP24,POLR2F,PLP1,RELN,NRG1,ZNF536,ST18,DOCK8,APOE,APBB1IP,DCC,ITPR2,SPP1,LAMA2,FCHSD2,DOCK5,SLC1A3,SGK1,CRYAB,PDE8A,GRIK1,PHLPP1,CLU,CNP,PDE1C,KCNQ3,ASIC2,PDE1A,RNF220,SLC1A2,FHIT,PITPNC1,PIP4K2A,WWOX,ALCAM,GRIN1,SHTN1,LRRC4C,MAPK10,ROBO2,MBP,UNC5C,ZEB2,RYR2,STXBP5L,FUT8,SLC24A2,GRID2,PLCL1,PTPRK,S…	Ex_3/4_up		GO:BP	vesicle-mediated transport in synapse	GO:0099003	0.0370924	1.43072	188	48	4	18017	NRXN1,STXBP5L,FGF14,PRKCB	Ast_3/4_down
GO:BP	synaptic transmission, glutamatergic	GO:0035249	0.00783916	2.10573	97	155	6	18017	RELN,GRIK1,GRIN1,GRID2,TNR,GRM3	Ex_3/4_up		GO:BP	transport across blood-brain barrier	GO:0150104	0.0376985	1.42368	87	48	3	18017	APOE,SLC1A2,SLCO3A1	Ast_3/4_down
GO:BP	forebrain development	GO:0030900	0.00878813	2.0561	408	155	12	18017	ERBB4,DLC1,B2M,RELN,NRG1,CNP,SLC1A2,GRIN1,ROBO2,ZEB2,TNR,ROBO1	Ex_3/4_up		GO:BP	phosphatidylinositol-mediated signaling	GO:0048015	0.0379576	1.4207	191	48	4	18017	PLCL1,GAB1,RELN,PIP4K2A	Ast_3/4_down
GO:BP	positive regulation of low-density lipoprotein particle receptor catabolic process	GO:0032805	0.00878813	2.0561	3	155	2	18017	APOE,ABCA2	Ex_3/4_up		GO:BP	vascular transport	GO:0010232	0.0379576	1.4207	88	48	3	18017	APOE,SLC1A2,SLCO3A1	Ast_3/4_down
GO:BP	cell-substrate junction assembly	GO:0007044	0.00892008	2.04963	100	155	6	18017	DLC1,BCAS3,PTPRK,MACF1,DST,MAP4K4	Ex_3/4_up		GO:BP	positive regulation of lipid transport across blood-brain barrier	GO:1903002	0.0385977	1.41344	1	48	1	18017	APOE	Ast_3/4_down
GO:BP	negative regulation of cell development	GO:0010721	0.00912826	2.03961	351	155	11	18017	ERBB4,B2M,NRG1,ZNF536,APOE,DCC,SPP1,SPOCK1,LINGO1,TNR,MAP4K4	Ex_3/4_up		GO:BP	regulation of motor neuron migration	GO:1905483	0.0385977	1.41344	1	48	1	18017	RELN	Ast_3/4_down
GO:BP	ensheathment of neurons	GO:0007272	0.00914566	2.03878	143	155	7	18017	CLDN11,PLP1,NRG1,QKI,ABCA2,CLU,MBP	Ex_3/4_up		GO:BP	regulation of lipid transport across blood-brain barrier	GO:1903000	0.0385977	1.41344	1	48	1	18017	APOE	Ast_3/4_down
GO:BP	axon ensheathment	GO:0008366	0.00914566	2.03878	143	155	7	18017	CLDN11,PLP1,NRG1,QKI,ABCA2,CLU,MBP	Ex_3/4_up		GO:BP	positive regulation of lateral motor column neuron migration	GO:1902078	0.0385977	1.41344	1	48	1	18017	RELN	Ast_3/4_down
GO:BP	long-term memory	GO:0007616	0.00945161	2.02449	36	155	4	18017	RELN,APOE,SGK1,GRIN1	Ex_3/4_up		GO:BP	regulation of heparan sulfate binding	GO:1905853	0.0385977	1.41344	1	48	1	18017	APOE	Ast_3/4_down
GO:BP	cyclic nucleotide catabolic process	GO:0009214	0.00976156	2.01048	15	155	3	18017	PDE8A,CNP,PDE1A	Ex_3/4_up		GO:BP	regulation of AMPA receptor activity	GO:2000311	0.0385977	1.41344	26	48	2	18017	RELN,NRXN1	Ast_3/4_down
GO:BP	regulation of receptor-mediated endocytosis	GO:0048259	0.00976156	2.01048	103	155	6	18017	B2M,TF,HIP1,ABCA2,CLU,SH3GL3	Ex_3/4_up		GO:BP	positive regulation of heparan sulfate binding	GO:1905855	0.0385977	1.41344	1	48	1	18017	APOE	Ast_3/4_down
GO:CC	cell junction	GO:0030054	1.61181e-10	9.79269	2058	159	51	18956	ADGRV1,CTNNA3,ERBB4,DLC1,CLDN11,B2M,PCDH15,FRMD4B,HIP1,DOCK10,ARHGAP24,PLP1,NRG1,APOE,APBB1IP,DCC,LAMA2,SPOCK1,FCHSD2,KAZN,SLC1A3,CRYAB,QKI,CDH20,GRIK1,CLU,CNP,KCNQ3,CNTN5,ASIC2,SLC1A2,ALCAM,GRIN1,LRRC4C,MBP,UNC5C,STXBP5L,GRID2,PTPRK,PNISR,SH3GL3,TJP1,TNR,PDZD2,FRMD4A,MACF1,DST,NFIA,GRM3,MAP4K4,CNTN1	Ex_3/4_up		GO:BP	regulation of heparan sulfate proteoglycan binding	GO:1905858	0.0385977	1.41344	1	48	1	18017	APOE	Ast_3/4_down
GO:CC	cell projection	GO:0042995	4.52968e-07	6.34393	2353	159	48	18956	ADGRV1,CTNNA3,SLC26A3,DLC1,CLDN11,PCDH15,FRMD4B,SNTG1,DOCK10,ARHGAP24,RELN,NRG1,DOCK8,APOE,APBB1IP,DCC,SPP1,LAMA2,SPOCK1,FCHSD2,SLC1A3,CRYAB,CLU,CNP,PDE1C,KCNQ3,ASIC2,SLC1A2,WWOX,ALCAM,GRIN1,SHTN1,MAPK10,ROBO2,MBP,QDPR,UNC5C,MAP7,GRID2,PTPRK,TJP1,AGBL4,NCAM1,ROBO1,MACF1,DST,GRM3,IQCJ-SCHIP1	Ex_3/4_up		GO:BP	regulation of cellular response to very-low-density lipoprotein particle stimulus	GO:1905890	0.0385977	1.41344	1	48	1	18017	APOE	Ast_3/4_down
GO:CC	synapse	GO:0045202	1.01632e-06	5.99297	1293	159	33	18956	ADGRV1,ERBB4,PCDH15,HIP1,DOCK10,PLP1,NRG1,APOE,DCC,LAMA2,SPOCK1,FCHSD2,SLC1A3,CRYAB,QKI,GRIK1,CLU,CNP,KCNQ3,CNTN5,ASIC2,SLC1A2,GRIN1,LRRC4C,MBP,UNC5C,STXBP5L,GRID2,PNISR,SH3GL3,TNR,GRM3,CNTN1	Ex_3/4_up		GO:BP	positive regulation of motor neuron migration	GO:1905485	0.0385977	1.41344	1	48	1	18017	RELN	Ast_3/4_down
GO:CC	neuron projection	GO:0043005	1.38685e-06	5.85797	1396	159	34	18956	ADGRV1,CLDN11,PCDH15,DOCK10,RELN,NRG1,APOE,DCC,LAMA2,SPOCK1,FCHSD2,SLC1A3,CRYAB,CLU,KCNQ3,ASIC2,SLC1A2,ALCAM,GRIN1,SHTN1,MAPK10,ROBO2,MBP,QDPR,UNC5C,MAP7,GRID2,PTPRK,AGBL4,NCAM1,ROBO1,DST,GRM3,IQCJ-SCHIP1	Ex_3/4_up		GO:BP	positive regulation of heparan sulfate proteoglycan binding	GO:1905860	0.0385977	1.41344	1	48	1	18017	APOE	Ast_3/4_down
GO:CC	plasma membrane bounded cell projection	GO:0120025	1.39549e-06	5.85527	2256	159	45	18956	ADGRV1,CTNNA3,SLC26A3,DLC1,CLDN11,PCDH15,FRMD4B,SNTG1,DOCK10,RELN,NRG1,DOCK8,APOE,APBB1IP,DCC,LAMA2,SPOCK1,FCHSD2,SLC1A3,CRYAB,CLU,CNP,PDE1C,KCNQ3,ASIC2,SLC1A2,WWOX,ALCAM,GRIN1,SHTN1,MAPK10,ROBO2,MBP,QDPR,UNC5C,MAP7,GRID2,PTPRK,AGBL4,NCAM1,ROBO1,MACF1,DST,GRM3,IQCJ-SCHIP1	Ex_3/4_up		GO:BP	regulation of synapse assembly	GO:0051963	0.0385977	1.41344	101	48	3	18017	NRXN1,GRIN1,LRFN5	Ast_3/4_down
GO:CC	cell periphery	GO:0071944	3.38187e-06	5.47084	5768	159	81	18956	ADGRV1,SGCZ,GPC5,ERBB4,ASTN2,SLC26A3,DLC1,CLDN11,B2M,PCDH15,TF,SLC5A11,SNTG1,HIP1,LSAMP,LHFPL3,PLP1,KCNH8,RELN,NRG1,DOCK8,APOE,APBB1IP,DCC,ITPR2,C10ORF90,LAMA2,LINGO1,FCHSD2,DOCK5,ANO4,MOBP,KAZN,SLC9A9,SLC1A3,SGK1,CRYAB,ABCA2,CDH20,GRIK1,PHLPP1,CLU,CNP,KCNQ3,BCAS3,CNTN5,ASIC2,SLCO3A1,SLC1A2,FHIT,PIP4K2A,WWOX,ALCAM,GRIN1,TMEFF2,LRRC4C,MAPK10,ROBO2,MBP,UNC5C,MAP7,ENOX1,RYR2,STXBP5L,SLC24A2,GRID2,PL…	Ex_3/4_up		GO:BP	positive regulation of transport across blood-brain barrier	GO:0150201	0.0385977	1.41344	1	48	1	18017	APOE	Ast_3/4_down
GO:CC	axon	GO:0030424	4.05583e-05	4.39192	658	159	20	18956	CLDN11,NRG1,DCC,SPOCK1,CRYAB,KCNQ3,SLC1A2,ALCAM,GRIN1,SHTN1,ROBO2,MBP,UNC5C,MAP7,PTPRK,AGBL4,ROBO1,DST,GRM3,IQCJ-SCHIP1	Ex_3/4_up		GO:BP	regulation of lateral motor column neuron migration	GO:1902076	0.0385977	1.41344	1	48	1	18017	RELN	Ast_3/4_down
GO:CC	plasma membrane	GO:0005886	0.0001526	3.81645	5655	159	75	18956	ADGRV1,SGCZ,GPC5,ERBB4,SLC26A3,DLC1,CLDN11,B2M,PCDH15,TF,SLC5A11,SNTG1,HIP1,LSAMP,LHFPL3,PLP1,KCNH8,RELN,NRG1,DOCK8,APOE,APBB1IP,DCC,ITPR2,C10ORF90,LAMA2,LINGO1,FCHSD2,DOCK5,ANO4,KAZN,SLC9A9,SLC1A3,SGK1,CRYAB,ABCA2,CDH20,GRIK1,PHLPP1,CNP,KCNQ3,CNTN5,ASIC2,SLCO3A1,SLC1A2,FHIT,PIP4K2A,WWOX,ALCAM,GRIN1,TMEFF2,LRRC4C,MAPK10,ROBO2,MBP,UNC5C,MAP7,ENOX1,RYR2,STXBP5L,SLC24A2,GRID2,PLCL1,PTPRK,PNISR,TJP1,…	Ex_3/4_up		GO:BP	regulation of collateral sprouting of intact axon in response to injury	GO:0048683	0.0385977	1.41344	1	48	1	18017	SPP1	Ast_3/4_down
GO:CC	cell leading edge	GO:0031252	0.000152666	3.81626	427	159	15	18956	ADGRV1,CTNNA3,DLC1,FRMD4B,SNTG1,DOCK8,APBB1IP,BCAS3,SLC1A2,SHTN1,ROBO2,UNC5C,PTPRK,MACF1,DST	Ex_3/4_up		GO:BP	collateral sprouting of intact axon in response to injury	GO:0048673	0.0385977	1.41344	1	48	1	18017	SPP1	Ast_3/4_down
GO:CC	main axon	GO:0044304	0.00104604	2.98045	69	159	6	18956	SPOCK1,KCNQ3,SLC1A2,ROBO2,MBP,IQCJ-SCHIP1	Ex_3/4_up		GO:BP	regulation of synaptic plasticity	GO:0048167	0.0385977	1.41344	196	48	4	18017	APOE,RELN,GRIN1,FGF14	Ast_3/4_down
GO:CC	somatodendritic compartment	GO:0036477	0.00169619	2.77052	873	159	20	18956	ASTN2,DOCK10,RELN,APOE,LAMA2,SLC1A3,CRYAB,CLU,PDE1C,ASIC2,PDE1A,ALCAM,GRIN1,SHTN1,MAPK10,MBP,UNC5C,GRID2,PTPRK,GRM3	Ex_3/4_up		GO:BP	inositol lipid-mediated signaling	GO:0048017	0.0385977	1.41344	195	48	4	18017	PLCL1,GAB1,RELN,PIP4K2A	Ast_3/4_down
GO:CC	plasma membrane region	GO:0098590	0.00265967	2.57517	1213	159	24	18956	ADGRV1,ERBB4,SLC26A3,DLC1,TF,SNTG1,HIP1,DOCK8,DCC,FCHSD2,SLC1A3,CRYAB,GRIK1,SLC1A2,GRIN1,LRRC4C,ROBO2,MAP7,GRID2,TJP1,MACF1,DST,GRM3,CNTN1	Ex_3/4_up		GO:BP	positive regulation of endocytosis	GO:0045807	0.0385977	1.41344	103	48	3	18017	APOE,HIP1,TF	Ast_3/4_down
GO:CC	leading edge membrane	GO:0031256	0.00413576	2.38344	177	159	8	18956	ADGRV1,DLC1,SNTG1,DOCK8,SLC1A2,ROBO2,PTPRK,MACF1	Ex_3/4_up		GO:BP	regulation of neuron differentiation	GO:0045664	0.0385977	1.41344	693	48	7	18017	APOE,SPP1,ZNF536,RELN,TCF12,CSMD3,GRIN1	Ast_3/4_down
GO:CC	postsynapse	GO:0098794	0.00423158	2.3735	591	159	15	18956	ERBB4,HIP1,DOCK10,DCC,LAMA2,SPOCK1,CRYAB,GRIK1,ASIC2,GRIN1,LRRC4C,GRID2,SH3GL3,GRM3,CNTN1	Ex_3/4_up		GO:BP	regulation of neurogenesis	GO:0050767	0.0385977	1.41344	867	48	8	18017	APOE,SPP1,ZNF536,MAN2A1,RELN,TCF12,CSMD3,GRIN1	Ast_3/4_down
GO:CC	cell surface	GO:0009986	0.00650673	2.18664	910	159	19	18956	ADGRV1,GPC5,B2M,TF,SLC1A3,CRYAB,CLU,KCNQ3,SLC1A2,ALCAM,GRIN1,ROBO2,MBP,UNC5C,ENOX1,PTPRK,TNR,NCAM1,ROBO1	Ex_3/4_up		GO:BP	ionotropic glutamate receptor signaling pathway	GO:0035235	0.0385977	1.41344	25	48	2	18017	GRIK1,GRIN1	Ast_3/4_down
GO:CC	synaptic cleft	GO:0043083	0.00730973	2.1361	16	159	3	18956	APOE,LAMA2,GRIN1	Ex_3/4_up		GO:BP	regulation of localization	GO:0032879	0.0385977	1.41344	2913	48	16	18017	APOE,SPP1,HIP1,SLC1A2,KCNH8,GAB1,RELN,TF,DOCK10,DOCK8,NRXN1,VSNL1,GRIN1,STXBP5L,FGF14,PRKCB	Ast_3/4_down
GO:CC	basal part of cell	GO:0045178	0.00730973	2.1361	69	159	5	18956	ERBB4,CLDN11,TF,SLC1A3,DST	Ex_3/4_up		GO:BP	propylene metabolic process	GO:0018964	0.0385977	1.41344	1	48	1	18017	GRIN1	Ast_3/4_down
GO:CC	postsynaptic membrane	GO:0045211	0.00730973	2.1361	255	159	9	18956	ERBB4,HIP1,DCC,GRIK1,GRIN1,LRRC4C,GRID2,GRM3,CNTN1	Ex_3/4_up		GO:BP	phospholipid transport	GO:0015914	0.0385977	1.41344	90	48	3	18017	APOE,PITPNC1,ANO4	Ast_3/4_down
GO:CC	neuromuscular junction	GO:0031594	0.00883272	2.05391	74	159	5	18956	NRG1,LAMA2,SPOCK1,FCHSD2,STXBP5L	Ex_3/4_up		GO:BP	locomotory behavior	GO:0007626	0.0385977	1.41344	209	48	4	18017	APOE,CNP,RELN,GRIN1	Ast_3/4_down
WP	MECP2 and Associated Rett Syndrome	WP:WP3584	0.00562637	2.24977	72	73	6	7474	FKBP5,SGK1,CNP,GRIN1,MBP,FUT8	Ex_3/4_up		GO:BP	multicellular organism development	GO:0007275	0.0385977	1.41344	5638	48	25	18017	APOE,PHLPP1,MOBP,EDIL3,SPP1,CNP,SLC1A2,ZNF536,MAN2A1,GAB1,RELN,TF,GRIK1,PIP4K2A,DOCK10,TCF12,QDPR,CLMN,PLP1,NRXN1,CSMD3,GRIN1,FGF14,LRFN5,PRKCB	Ast_3/4_down
WP	Glial Cell Differentiation	WP:WP2276	0.00562637	2.24977	8	73	3	7474	PLP1,CNP,MBP	Ex_3/4_up		GO:BP	steroid catabolic process	GO:0006706	0.0385977	1.41344	27	48	2	18017	APOE,SPP1	Ast_3/4_down
HPA	hippocampus; glial cells[‚â•Medium]	HPA:0250122	0.000251393	3.59965	1944	99	38	10719	GPC5,CLDN11,HIP1,FKBP5,DOCK10,POLR2F,KCNH8,ZBTB20,APOE,APBB1IP,PTGDS,LINGO1,SLC1A3,SGK1,CRYAB,QKI,PDE8A,TMEM165,CNP,PDE1A,SLC1A2,KLHL32,FHIT,EDIL3,PIP4K2A,DIP2B,SHTN1,MBP,QDPR,MAP7,FUT8,PNISR,RORA,NPAS3,PEX5L,TCF12,NFIA,IQCJ-SCHIP1	Ex_3/4_up		GO:BP	startle response	GO:0001964	0.0385977	1.41344	28	48	2	18017	NRXN1,GRIN1	Ast_3/4_down
HPA	cerebral cortex; glial cells[‚â•Medium]	HPA:0100122	0.000251393	3.59965	2603	99	46	10719	GPC5,PLXDC2,CLDN11,HIP1,FKBP5,DOCK10,MAML2,POLR2F,PLP1,KCNH8,ZBTB20,APOE,LINGO1,SLC1A3,SGK1,CRYAB,QKI,PDE8A,ABCA2,TMEM165,CNP,BCAS3,ASIC2,PDE1A,KLHL32,FHIT,EDIL3,PIP4K2A,MACROD2,SHTN1,QDPR,MAP7,ZEB2,FUT8,PLCL1,PNISR,RORA,NPAS3,PEX5L,TCF12,MACF1,NFIA,UBE2E2,MEF2A,N4BP2L2,IQCJ-SCHIP1	Ex_3/4_up		GO:BP	cell junction organization	GO:0034330	0.0385977	1.41344	703	48	7	18017	APOE,RELN,DOCK10,LRRTM4,NRXN1,GRIN1,LRFN5	Ast_3/4_down
HPA	hippocampus; glial cells[‚â•Low]	HPA:0250121	0.000863548	3.06371	4049	99	59	10719	GPC5,CTNNA3,ERBB4,PLXDC2,CLDN11,B2M,HIP1,FKBP5,DOCK10,ARHGAP24,POLR2F,KCNH8,ZBTB20,CNDP1,APOE,APBB1IP,PTGDS,LINGO1,DOCK5,SLC1A3,SGK1,FOXN3,CRYAB,QKI,PDE8A,TMEM165,CNP,BCAS3,CNTN5,ASIC2,PDE1A,SLC1A2,KLHL32,FHIT,EDIL3,PIP4K2A,ALCAM,DIP2B,TMEFF2,MACROD2,SHTN1,MBP,QDPR,MAP7,ZEB2,MAN2A1,FUT8,PLCL1,PNISR,RORA,NPAS3,NCAM1,PEX5L,TCF12,MACF1,NFIA,UBE2E2,N4BP2L2,IQCJ-SCHIP1	Ex_3/4_up		GO:BP	localization within membrane	GO:0051668	0.0385977	1.41344	97	48	3	18017	APOE,RELN,NRXN1	Ast_3/4_down
HPA	hippocampus	HPA:0250000	0.0044424	2.35238	6687	99	80	10719	GPC5,CTNNA3,ERBB4,PLXDC2,CLDN11,B2M,SAT1,CHST11,HIP1,FKBP5,DOCK10,MAML2,ARHGAP24,POLR2F,PLP1,KCNH8,ZBTB20,CNDP1,DOCK8,APOE,APBB1IP,DCC,PTGDS,LINGO1,DOCK5,KAZN,SLC9A9,SLC1A3,SGK1,FOXN3,CRYAB,QKI,PDE8A,ABCA2,TMEM165,CLU,CNP,BCAS3,CNTN5,ASIC2,PDE1A,SLC1A2,KLHL32,FHIT,EDIL3,PIP4K2A,WWOX,ALCAM,GRIN1,DIP2B,TMEFF2,MACROD2,SHTN1,LRRC4C,MAPK10,ROBO2,MBP,QDPR,MAP7,ZEB2,MAN2A1,RYR2,FUT8,IDS,KIAA1217,PLCL1,P…	Ex_3/4_up		GO:BP	negative regulation of collateral sprouting of intact axon in response to injury	GO:0048685	0.0385977	1.41344	1	48	1	18017	SPP1	Ast_3/4_down
GO:MF	cytoskeletal protein binding	GO:0008092	0.000319532	3.49549	983	125	22	18602	CLU,YWHAH,CTNNA3,GAPDH,TMSB10,CLMN,APOE,C10ORF90,STXBP5L,ENC1,AGBL4,CTNNA2,SSH2,CRYAB,SHTN1,BCAS3,MOBP,HIP1,CAMK2B,ACTB,STMN2,DLG1	In_3/4_up		GO:BP	synapse maturation	GO:0060074	0.0385977	1.41344	26	48	2	18017	RELN,NRXN1	Ast_3/4_down
GO:MF	metal ion transmembrane transporter activity	GO:0046873	0.00220669	2.65626	439	125	13	18602	ASIC2,SLC24A2,SLC9A9,SLC5A11,SLC1A3,CACNA2D3,ATP1B1,KCNH8,SLC1A2,ITPR2,GRIN1,CACNA2D1,RYR2	In_3/4_up		GO:BP	plasma membrane bounded cell projection organization	GO:0120036	0.0385977	1.41344	1567	48	11	18017	APOE,SPP1,CNP,GAB1,RELN,DOCK10,CLMN,PLP1,NRXN1,CSMD3,GRIN1	Ast_3/4_down
GO:MF	structural constituent of myelin sheath	GO:0019911	0.00614727	2.21132	10	125	3	18602	PLP1,MBP,MOBP	In_3/4_up		GO:BP	neuron projection organization	GO:0106027	0.0385977	1.41344	91	48	3	18017	APOE,RELN,DOCK10	Ast_3/4_down
GO:MF	inorganic cation transmembrane transporter activity	GO:0022890	0.00884077	2.05351	600	125	13	18602	ASIC2,SLC24A2,SLC9A9,SLC5A11,SLC1A3,CACNA2D3,ATP1B1,KCNH8,SLC1A2,ITPR2,GRIN1,CACNA2D1,RYR2	In_3/4_up		GO:BP	regulation of postsynapse organization	GO:0099175	0.0385977	1.41344	95	48	3	18017	APOE,RELN,NRXN1	Ast_3/4_down
GO:MF	transmembrane transporter activity	GO:0022857	0.00884077	2.05351	1078	125	18	18602	SLC26A3,ASIC2,SLC24A2,TMEM144,SLC9A9,SLC5A11,SLC1A3,CACNA2D3,ATP1B1,ABCA2,KCNH8,SLC1A2,ITPR2,GRIN1,CACNA2D1,SLC44A1,SLCO3A1,RYR2	In_3/4_up		GO:BP	regulation of transport across blood-brain barrier	GO:0150200	0.0385977	1.41344	1	48	1	18017	APOE	Ast_3/4_down
GO:MF	ion channel binding	GO:0044325	0.00884077	2.05351	134	125	6	18602	YWHAH,DPP10,PDE4D,ITPR2,DLG1,RYR2	In_3/4_up		GO:BP	regulation of synaptic vesicle cycle	GO:0098693	0.0385977	1.41344	95	48	3	18017	STXBP5L,FGF14,PRKCB	Ast_3/4_down
GO:MF	active ion transmembrane transporter activity	GO:0022853	0.00884077	2.05351	235	125	8	18602	SLC26A3,SLC24A2,SLC9A9,SLC5A11,SLC1A3,ATP1B1,SLC1A2,SLCO3A1	In_3/4_up		GO:BP	postsynaptic density organization	GO:0097106	0.0385977	1.41344	28	48	2	18017	RELN,NRXN1	Ast_3/4_down
GO:MF	adrenergic receptor binding	GO:0031690	0.00884077	2.05351	20	125	3	18602	UCHL1,APLP1,PDE4D	In_3/4_up		GO:BP	postsynaptic specialization organization	GO:0099084	0.0385977	1.41344	28	48	2	18017	RELN,NRXN1	Ast_3/4_down
GO:MF	structural constituent of postsynapse	GO:0099186	0.00884077	2.05351	13	125	3	18602	NEFL,ACTB,DLG1	In_3/4_up		GO:BP	protein-containing complex assembly involved in synapse maturation	GO:0090126	0.0385977	1.41344	1	48	1	18017	NRXN1	Ast_3/4_down
GO:MF	cation transmembrane transporter activity	GO:0008324	0.00884077	2.05351	646	125	14	18602	ASIC2,SLC24A2,SLC9A9,SLC5A11,SLC1A3,CACNA2D3,ATP1B1,KCNH8,SLC1A2,ITPR2,GRIN1,CACNA2D1,SLC44A1,RYR2	In_3/4_up		GO:BP	intermediate-density lipoprotein particle clearance	GO:0071831	0.0385977	1.41344	1	48	1	18017	APOE	Ast_3/4_down
GO:MF	glutamate:sodium symporter activity	GO:0015501	0.00884077	2.05351	4	125	2	18602	SLC1A3,SLC1A2	In_3/4_up		GO:BP	memory T cell proliferation	GO:0061485	0.0385977	1.41344	1	48	1	18017	DOCK8	Ast_3/4_down
GO:MF	calcium ion transmembrane transporter activity	GO:0015085	0.00884077	2.05351	132	125	6	18602	SLC24A2,CACNA2D3,ITPR2,GRIN1,CACNA2D1,RYR2	In_3/4_up		GO:BP	dendritic spine development	GO:0060996	0.0385977	1.41344	101	48	3	18017	APOE,RELN,DOCK10	Ast_3/4_down
GO:MF	actin binding	GO:0003779	0.00884077	2.05351	437	125	11	18602	YWHAH,CTNNA3,TMSB10,CLMN,ENC1,CTNNA2,SSH2,SHTN1,MOBP,HIP1,CAMK2B	In_3/4_up		GO:BP	cellular response to very-low-density lipoprotein particle stimulus	GO:0090731	0.0385977	1.41344	1	48	1	18017	APOE	Ast_3/4_down
GO:MF	sodium ion transmembrane transporter activity	GO:0015081	0.00884077	2.05351	157	125	7	18602	ASIC2,SLC24A2,SLC9A9,SLC5A11,SLC1A3,ATP1B1,SLC1A2	In_3/4_up		GO:BP	regulation of presynapse assembly	GO:1905606	0.0387326	1.41192	29	48	2	18017	NRXN1,LRFN5	Ast_3/4_down
GO:MF	ion transmembrane transporter activity	GO:0015075	0.00884077	2.05351	885	125	16	18602	SLC26A3,ASIC2,SLC24A2,SLC9A9,SLC5A11,SLC1A3,CACNA2D3,ATP1B1,KCNH8,SLC1A2,ITPR2,GRIN1,CACNA2D1,SLC44A1,SLCO3A1,RYR2	In_3/4_up		GO:BP	cell projection organization	GO:0030030	0.0399941	1.398	1608	48	11	18017	APOE,SPP1,CNP,GAB1,RELN,DOCK10,CLMN,PLP1,NRXN1,CSMD3,GRIN1	Ast_3/4_down
GO:MF	structural constituent of synapse	GO:0098918	0.00884077	2.05351	18	125	3	18602	NEFL,ACTB,DLG1	In_3/4_up		GO:BP	excitatory postsynaptic potential	GO:0060079	0.0399941	1.398	106	48	3	18017	RELN,NRXN1,GRIN1	Ast_3/4_down
GO:MF	high-affinity glutamate transmembrane transporter activity	GO:0005314	0.00884077	2.05351	4	125	2	18602	SLC1A3,SLC1A2	In_3/4_up		GO:BP	regulation of presynapse organization	GO:0099174	0.0403841	1.39379	30	48	2	18017	NRXN1,LRFN5	Ast_3/4_down
GO:MF	calcium channel activity	GO:0005262	0.00884077	2.05351	116	125	6	18602	SLC24A2,CACNA2D3,ITPR2,GRIN1,CACNA2D1,RYR2	In_3/4_up		GO:BP	protein localization to cell junction	GO:1902414	0.0403841	1.39379	107	48	3	18017	RELN,NRXN1,GRIN1	Ast_3/4_down
GO:MF	structural molecule activity	GO:0005198	0.00884077	2.05351	696	125	14	18602	NEFL,TUBA1B,CLDN11,PLP1,MBP,APOE,CTNNA2,LAMA2,CRYAB,MAP7,MOBP,HIP1,ACTB,DLG1	In_3/4_up		GO:BP	regulation of ion transport	GO:0043269	0.0403978	1.39364	726	48	7	18017	APOE,KCNH8,RELN,TF,NRXN1,GRIN1,FGF14	Ast_3/4_down
GO:BP	nervous system development	GO:0007399	2.00098e-07	6.69876	2483	124	46	18017	CLU,LINGO1,NEFL,NRGN,YWHAH,DHFR,ASIC2,UCHL1,PTPRK,CLDN11,ADGRV1,PLP1,CNP,CBLN2,B2M,SPP1,MBP,GAB1,CLMN,APOE,ENC1,ASTN2,SLC1A3,NDRG4,UNC5D,AGBL4,FAIM2,CTNNA2,APLP1,ZSWIM6,LAMA2,DYNLL1,SHTN1,PCDH15,ABCA2,SLC1A2,MOBP,CAMK2B,ACTB,STMN2,NTM,GRIN1,MAN2A1,CKB,DLG1,TNR	In_3/4_up		GO:BP	positive regulation of synaptic transmission, glutamatergic	GO:0051968	0.0419407	1.37736	31	48	2	18017	RELN,NRXN1	Ast_3/4_down
GO:BP	neuron development	GO:0048666	3.29029e-07	6.48277	1167	124	30	18017	LINGO1,NEFL,YWHAH,DHFR,UCHL1,PTPRK,ADGRV1,PLP1,CNP,B2M,SPP1,GAB1,CLMN,APOE,ENC1,SLC1A3,NDRG4,UNC5D,AGBL4,CTNNA2,ZSWIM6,LAMA2,SHTN1,PCDH15,CAMK2B,ACTB,STMN2,NTM,GRIN1,TNR	In_3/4_up		GO:BP	signaling	GO:0023052	0.0419407	1.37736	6814	48	28	18017	APOE,PITPNC1,PLCL1,PHLPP1,ST18,SPP1,PDE1C,CNP,HIP1,GRM3,SLC1A2,MTRNR2L12,ZNF536,GAB1,RELN,TF,GRIK1,PIP4K2A,DOCK10,APBB1IP,DOCK8,PLP1,NRXN1,VSNL1,GRIN1,STXBP5L,FGF14,PRKCB	Ast_3/4_down
GO:BP	neuron projection development	GO:0031175	1.393e-06	5.85605	1030	124	27	18017	LINGO1,NEFL,YWHAH,DHFR,UCHL1,PTPRK,ADGRV1,PLP1,CNP,B2M,SPP1,GAB1,CLMN,APOE,ENC1,NDRG4,UNC5D,CTNNA2,ZSWIM6,LAMA2,SHTN1,PCDH15,CAMK2B,ACTB,STMN2,GRIN1,TNR	In_3/4_up		GO:BP	ion transmembrane transport	GO:0034220	0.0475931	1.32246	1179	48	9	18017	SLC1A2,KCNH8,RELN,GRIK1,ANO4,FAM155A,NRXN1,GRIN1,FGF14	Ast_3/4_down
GO:BP	neurogenesis	GO:0022008	1.71699e-06	5.76523	1710	124	35	18017	CLU,LINGO1,NEFL,YWHAH,DHFR,UCHL1,PTPRK,ADGRV1,PLP1,CNP,B2M,SPP1,GAB1,CLMN,APOE,ENC1,ASTN2,SLC1A3,NDRG4,UNC5D,AGBL4,FAIM2,CTNNA2,ZSWIM6,LAMA2,SHTN1,PCDH15,ABCA2,CAMK2B,ACTB,STMN2,NTM,GRIN1,MAN2A1,TNR	In_3/4_up		GO:BP	chemical synaptic transmission, postsynaptic	GO:0099565	0.0476337	1.32209	115	48	3	18017	RELN,NRXN1,GRIN1	Ast_3/4_down
GO:BP	neuron differentiation	GO:0030182	3.60733e-06	5.44281	1437	124	31	18017	LINGO1,NEFL,YWHAH,DHFR,UCHL1,PTPRK,ADGRV1,PLP1,CNP,B2M,SPP1,GAB1,CLMN,APOE,ENC1,SLC1A3,NDRG4,UNC5D,AGBL4,FAIM2,CTNNA2,ZSWIM6,LAMA2,SHTN1,PCDH15,CAMK2B,ACTB,STMN2,NTM,GRIN1,TNR	In_3/4_up		GO:BP	negative regulation of protein secretion	GO:0050709	0.049626	1.30429	117	48	3	18017	APOE,VSNL1,STXBP5L	Ast_3/4_down
GO:BP	generation of neurons	GO:0048699	3.60733e-06	5.44281	1605	124	33	18017	LINGO1,NEFL,YWHAH,DHFR,UCHL1,PTPRK,ADGRV1,PLP1,CNP,B2M,SPP1,GAB1,CLMN,APOE,ENC1,ASTN2,SLC1A3,NDRG4,UNC5D,AGBL4,FAIM2,CTNNA2,ZSWIM6,LAMA2,SHTN1,PCDH15,CAMK2B,ACTB,STMN2,NTM,GRIN1,MAN2A1,TNR	In_3/4_up		GO:CC	synapse	GO:0045202	0.000769818	3.11361	1293	49	14	18956	APOE,CNP,HIP1,GRM3,SLC1A2,GRIK1,DOCK10,LRRTM4,PLP1,NRXN1,GRIN1,STXBP5L,LRFN5,PRKCB	Ast_3/4_down
GO:BP	regulation of localization	GO:0032879	5.66231e-06	5.24701	2913	124	46	18017	CLU,NEFL,NKAIN2,YWHAH,CTNNA3,ASIC2,GPC5,PTPRK,GAPDH,TMSB10,TF,B2M,SPP1,GAB1,APOE,STXBP5L,DOCK8,ASTN2,NDRG4,CACNA2D3,UNC5D,DOCK5,CTNNA2,ZSWIM6,LAMA2,SSH2,VSNL1,CRYAB,ATP1B1,SHTN1,BCAS3,ABCA2,KCNH8,DPP10,SLC1A2,PDE4D,HIP1,CAMK2B,ACTB,ITPR2,DPP6,GRIN1,CACNA2D1,LDLRAD4,DLG1,RYR2	In_3/4_up		GO:CC	cell junction	GO:0030054	0.00101363	2.99412	2058	49	17	18956	APOE,CNP,HIP1,GRM3,SLC1A2,FRMD4B,GAB1,GRIK1,DOCK10,APBB1IP,LRRTM4,PLP1,NRXN1,GRIN1,STXBP5L,LRFN5,PRKCB	Ast_3/4_down
GO:BP	substantia nigra development	GO:0021762	7.31478e-06	5.1358	44	124	7	18017	YWHAH,PLP1,CNP,MBP,DYNLL1,ACTB,CKB	In_3/4_up		GO:CC	cell periphery	GO:0071944	0.00218408	2.66073	5768	49	29	18956	APOE,PLCL1,PHLPP1,MOBP,C10ORF90,CNP,HIP1,GRM3,SLC1A2,KCNH8,RELN,TF,GRIK1,PIP4K2A,LHFPL3,APBB1IP,LRRTM4,ANO4,DOCK8,FAM155A,PLP1,SLCO3A1,NRXN1,SNTG1,CSMD3,GRIN1,STXBP5L,LRFN5,PRKCB	Ast_3/4_down
GO:BP	cell morphogenesis involved in neuron differentiation	GO:0048667	1.40158e-05	4.85338	615	124	19	18017	LINGO1,NEFL,YWHAH,UCHL1,CNP,SPP1,GAB1,APOE,SLC1A3,UNC5D,CTNNA2,ZSWIM6,LAMA2,SHTN1,PCDH15,CAMK2B,ACTB,GRIN1,TNR	In_3/4_up		GO:CC	synaptic membrane	GO:0097060	0.00218408	2.66073	358	49	7	18956	HIP1,GRM3,GRIK1,LRRTM4,NRXN1,GRIN1,LRFN5	Ast_3/4_down
GO:BP	anterograde trans-synaptic signaling	GO:0098916	1.40158e-05	4.85338	694	124	20	18017	NRGN,YWHAH,ASIC2,PLCL1,SLC24A2,PLP1,CNP,CBLN2,GRM3,MBP,APOE,STXBP5L,SLC1A3,LAMA2,SLC1A2,CAMK2B,GRIN1,DLG1,TNR,DTNA	In_3/4_up		GO:CC	postsynaptic membrane	GO:0045211	0.0023966	2.6204	255	49	6	18956	HIP1,GRM3,GRIK1,LRRTM4,GRIN1,LRFN5	Ast_3/4_down
GO:BP	chemical synaptic transmission	GO:0007268	1.40158e-05	4.85338	694	124	20	18017	NRGN,YWHAH,ASIC2,PLCL1,SLC24A2,PLP1,CNP,CBLN2,GRM3,MBP,APOE,STXBP5L,SLC1A3,LAMA2,SLC1A2,CAMK2B,GRIN1,DLG1,TNR,DTNA	In_3/4_up		GO:CC	plasma membrane	GO:0005886	0.00259369	2.58608	5655	49	28	18956	APOE,PLCL1,PHLPP1,C10ORF90,CNP,HIP1,GRM3,SLC1A2,KCNH8,RELN,TF,GRIK1,PIP4K2A,LHFPL3,APBB1IP,LRRTM4,ANO4,DOCK8,FAM155A,PLP1,SLCO3A1,NRXN1,SNTG1,CSMD3,GRIN1,STXBP5L,LRFN5,PRKCB	Ast_3/4_down
GO:BP	cell morphogenesis involved in differentiation	GO:0000904	1.40158e-05	4.85338	764	124	21	18017	LINGO1,NEFL,YWHAH,UCHL1,CNP,SPP1,GAB1,APOE,SLC1A3,UNC5D,DOCK5,CTNNA2,ZSWIM6,LAMA2,SHTN1,PCDH15,CAMK2B,ACTB,GRIN1,ATRNL1,TNR	In_3/4_up		GO:CC	cell projection	GO:0042995	0.00636249	2.19637	2353	49	16	18956	APOE,SPP1,PDE1C,CNP,GRM3,SLC1A2,FRMD4B,RELN,DOCK10,APBB1IP,QDPR,DOCK8,NRXN1,SNTG1,GRIN1,PRKCB	Ast_3/4_down
GO:BP	cell development	GO:0048468	1.44854e-05	4.83907	2237	124	38	18017	CLU,LINGO1,SLC26A3,NEFL,YWHAH,DHFR,UCHL1,PTPRK,ADGRV1,PLP1,CNP,B2M,SPP1,GAB1,CLMN,APOE,ENC1,SLC1A3,NDRG4,UNC5D,DOCK5,AGBL4,SMYD3,CTNNA2,ZSWIM6,LAMA2,SHTN1,PCDH15,ABCA2,PDE4D,CAMK2B,ACTB,STMN2,NTM,GRIN1,ATRNL1,MAN2A1,TNR	In_3/4_up		GO:CC	plasma membrane region	GO:0098590	0.00669186	2.17445	1213	49	11	18956	HIP1,GRM3,SLC1A2,TF,GRIK1,LRRTM4,DOCK8,NRXN1,SNTG1,GRIN1,LRFN5	Ast_3/4_down
GO:BP	trans-synaptic signaling	GO:0099537	1.44854e-05	4.83907	702	124	20	18017	NRGN,YWHAH,ASIC2,PLCL1,SLC24A2,PLP1,CNP,CBLN2,GRM3,MBP,APOE,STXBP5L,SLC1A3,LAMA2,SLC1A2,CAMK2B,GRIN1,DLG1,TNR,DTNA	In_3/4_up		GO:CC	plasma membrane bounded cell projection	GO:0120025	0.0108433	1.96484	2256	49	15	18956	APOE,PDE1C,CNP,GRM3,SLC1A2,FRMD4B,RELN,DOCK10,APBB1IP,QDPR,DOCK8,NRXN1,SNTG1,GRIN1,PRKCB	Ast_3/4_down
GO:BP	synaptic signaling	GO:0099536	2.23101e-05	4.6515	724	124	20	18017	NRGN,YWHAH,ASIC2,PLCL1,SLC24A2,PLP1,CNP,CBLN2,GRM3,MBP,APOE,STXBP5L,SLC1A3,LAMA2,SLC1A2,CAMK2B,GRIN1,DLG1,TNR,DTNA	In_3/4_up		GO:CC	glutamatergic synapse	GO:0098978	0.0109292	1.96141	248	49	5	18956	APOE,HIP1,NRXN1,GRIN1,LRFN5	Ast_3/4_down
GO:BP	axon development	GO:0061564	2.79343e-05	4.55386	533	124	17	18017	LINGO1,NEFL,DHFR,UCHL1,PLP1,CNP,SPP1,GAB1,APOE,UNC5D,CTNNA2,ZSWIM6,LAMA2,SHTN1,ACTB,GRIN1,TNR	In_3/4_up		GO:CC	synaptic cleft	GO:0043083	0.0159264	1.79788	16	49	2	18956	APOE,GRIN1	Ast_3/4_down
GO:BP	neural nucleus development	GO:0048857	4.98013e-05	4.30276	64	124	7	18017	YWHAH,PLP1,CNP,MBP,DYNLL1,ACTB,CKB	In_3/4_up		GO:CC	postsynapse	GO:0098794	0.0159264	1.79788	591	49	7	18956	HIP1,GRM3,GRIK1,DOCK10,LRRTM4,GRIN1,LRFN5	Ast_3/4_down
GO:BP	plasma membrane bounded cell projection organization	GO:0120036	0.000109393	3.96101	1567	124	29	18017	LINGO1,NEFL,YWHAH,DHFR,UCHL1,PTPRK,ADGRV1,PLP1,CNP,B2M,SPP1,GAB1,CLMN,APOE,ENC1,NDRG4,UNC5D,CTNNA2,ZSWIM6,LAMA2,DYNLL1,SHTN1,BCAS3,PCDH15,CAMK2B,ACTB,STMN2,GRIN1,TNR	In_3/4_up		GO:CC	astrocyte projection	GO:0097449	0.0255159	1.59319	21	49	2	18956	GRM3,SLC1A2	Ast_3/4_down
GO:BP	cell morphogenesis	GO:0000902	0.000126832	3.89677	1058	124	23	18017	CLU,LINGO1,NEFL,YWHAH,UCHL1,CNP,SPP1,GAB1,APOE,SLC1A3,UNC5D,DOCK5,CTNNA2,ZSWIM6,LAMA2,SHTN1,PCDH15,CAMK2B,ACTB,GRIN1,ATRNL1,DLG1,TNR	In_3/4_up		GO:CC	presynapse	GO:0098793	0.0317091	1.49882	502	49	6	18956	HIP1,GRM3,SLC1A2,NRXN1,GRIN1,PRKCB	Ast_3/4_down
GO:BP	metal ion transport	GO:0030001	0.00015395	3.81262	911	124	21	18017	NKAIN2,YWHAH,ASIC2,TF,SLC24A2,SLC9A9,B2M,SLC5A11,SLC1A3,CACNA2D3,ATP1B1,KCNH8,DPP10,PDE4D,CAMK2B,ITPR2,DPP6,GRIN1,CACNA2D1,DLG1,RYR2	In_3/4_up		KEGG	Glutamatergic synapse	KEGG:04724	0.000979892	3.00882	114	21	5	7963	GRM3,SLC1A2,GRIK1,GRIN1,PRKCB	Ast_3/4_down
GO:BP	cell projection organization	GO:0030030	0.000159275	3.79785	1608	124	29	18017	LINGO1,NEFL,YWHAH,DHFR,UCHL1,PTPRK,ADGRV1,PLP1,CNP,B2M,SPP1,GAB1,CLMN,APOE,ENC1,NDRG4,UNC5D,CTNNA2,ZSWIM6,LAMA2,DYNLL1,SHTN1,BCAS3,PCDH15,CAMK2B,ACTB,STMN2,GRIN1,TNR	In_3/4_up		KEGG	Spinocerebellar ataxia	KEGG:05017	0.0240534	1.61882	142	21	4	7963	RELN,GRIN1,FGF14,PRKCB	Ast_3/4_down
GO:BP	axonogenesis	GO:0007409	0.000185048	3.73272	488	124	15	18017	LINGO1,NEFL,UCHL1,CNP,SPP1,GAB1,APOE,UNC5D,CTNNA2,ZSWIM6,LAMA2,SHTN1,ACTB,GRIN1,TNR	In_3/4_up		REAC	Neuronal System	REAC:R-HSA-112316	0.00805542	2.09391	399	26	7	10627	SLC1A2,KCNH8,GRIK1,LRRTM4,NRXN1,GRIN1,PRKCB	Ast_3/4_down
GO:BP	regulation of ion transport	GO:0043269	0.00031652	3.4996	726	124	18	18017	NEFL,NKAIN2,YWHAH,ASIC2,TF,B2M,APOE,CACNA2D3,ATP1B1,KCNH8,DPP10,PDE4D,CAMK2B,DPP6,GRIN1,CACNA2D1,DLG1,RYR2	In_3/4_up		REAC	Neurexins and neuroligins	REAC:R-HSA-6794361	0.0377001	1.42366	56	26	3	10627	LRRTM4,NRXN1,GRIN1	Ast_3/4_down
GO:BP	regulation of transport	GO:0051049	0.000385412	3.41407	1887	124	31	18017	CLU,NEFL,NKAIN2,YWHAH,ASIC2,GAPDH,TF,B2M,SPP1,APOE,STXBP5L,NDRG4,CACNA2D3,VSNL1,CRYAB,ATP1B1,BCAS3,ABCA2,KCNH8,DPP10,SLC1A2,PDE4D,HIP1,CAMK2B,ACTB,ITPR2,DPP6,GRIN1,CACNA2D1,DLG1,RYR2	In_3/4_up		WP	Glial Cell Differentiation	WP:WP2276	0.0181125	1.74202	8	20	2	7474	CNP,PLP1	Ast_3/4_down
GO:BP	negative regulation of amyloid fibril formation	GO:1905907	0.000385412	3.41407	5	124	3	18017	CLU,APOE,CRYAB	In_3/4_up		GO:MF	nitric-oxide synthase regulator activity	GO:0030235	1.49177e-06	5.8263	8	54	4	18602	HSP90AA1,CALM1,CALM3,HSP90AB1	Ex_3/4_down
GO:BP	central nervous system development	GO:0007417	0.000385412	3.41407	1065	124	22	18017	CLU,NEFL,NRGN,YWHAH,ASIC2,PLP1,CNP,B2M,MBP,NDRG4,UNC5D,AGBL4,FAIM2,CTNNA2,ZSWIM6,DYNLL1,ABCA2,SLC1A2,ACTB,GRIN1,CKB,TNR	In_3/4_up		GO:MF	disordered domain specific binding	GO:0097718	0.000383419	3.41633	35	54	4	18602	HSP90AA1,CALM1,CALM3,HSP90AB1	Ex_3/4_down
GO:BP	regulation of neuron projection development	GO:0010975	0.000391058	3.40776	528	124	15	18017	LINGO1,NEFL,YWHAH,B2M,SPP1,APOE,ENC1,NDRG4,CTNNA2,ZSWIM6,SHTN1,CAMK2B,STMN2,GRIN1,TNR	In_3/4_up		GO:MF	cytoskeletal protein binding	GO:0008092	0.000383419	3.41633	983	54	13	18602	HSP90AA1,STMN1,TMSB4X,TMSB10,ENC1,CALM1,CALM3,MAP1B,YWHAH,HSP90AB1,ACTB,PRNP,CLASP2	Ex_3/4_down
GO:BP	midbrain development	GO:0030901	0.000391058	3.40776	93	124	7	18017	YWHAH,PLP1,CNP,MBP,DYNLL1,ACTB,CKB	In_3/4_up		GO:MF	G protein-coupled glutamate receptor binding	GO:0035256	0.000549077	3.26037	13	54	3	18602	CALM1,CALM3,PRNP	Ex_3/4_down
GO:BP	neuron projection morphogenesis	GO:0048812	0.000424034	3.3726	678	124	17	18017	LINGO1,NEFL,YWHAH,UCHL1,CNP,SPP1,GAB1,APOE,UNC5D,CTNNA2,ZSWIM6,LAMA2,SHTN1,CAMK2B,ACTB,GRIN1,TNR	In_3/4_up		GO:MF	MHC class II protein complex binding	GO:0023026	0.000610573	3.21426	16	54	3	18602	HSP90AA1,HSP90AB1,PKM	Ex_3/4_down
GO:BP	regulation of metal ion transport	GO:0010959	0.000476833	3.32163	407	124	13	18017	NKAIN2,YWHAH,TF,B2M,ATP1B1,DPP10,PDE4D,CAMK2B,DPP6,GRIN1,CACNA2D1,DLG1,RYR2	In_3/4_up		GO:MF	nitric-oxide synthase binding	GO:0050998	0.000610573	3.21426	15	54	3	18602	CALM1,CALM3,ACTB	Ex_3/4_down
GO:BP	plasma membrane bounded cell projection morphogenesis	GO:0120039	0.000520219	3.28381	692	124	17	18017	LINGO1,NEFL,YWHAH,UCHL1,CNP,SPP1,GAB1,APOE,UNC5D,CTNNA2,ZSWIM6,LAMA2,SHTN1,CAMK2B,ACTB,GRIN1,TNR	In_3/4_up		GO:MF	enzyme binding	GO:0019899	0.000610573	3.21426	2282	54	19	18602	RTN4,HSP90AA1,TMSB4X,PEBP1,CALM1,CALM3,CKB,PLCB1,YWHAH,HSP90AB1,PPP3CA,NEFL,NTRK2,THY1,ACTB,PRNP,TUBA1B,PSAP,APP	Ex_3/4_down
GO:BP	cell projection morphogenesis	GO:0048858	0.000543831	3.26454	696	124	17	18017	LINGO1,NEFL,YWHAH,UCHL1,CNP,SPP1,GAB1,APOE,UNC5D,CTNNA2,ZSWIM6,LAMA2,SHTN1,CAMK2B,ACTB,GRIN1,TNR	In_3/4_up		GO:MF	structural constituent of synapse	GO:0098918	0.000775286	3.11054	18	54	3	18602	NEFL,PPFIA2,ACTB	Ex_3/4_down
GO:BP	cation transport	GO:0006812	0.000585966	3.23213	1197	124	23	18017	NEFL,NKAIN2,YWHAH,ASIC2,TF,SLC24A2,SLC9A9,B2M,SLC5A11,SLC1A3,CACNA2D3,ATP1B1,KCNH8,DPP10,PDE4D,CAMK2B,ITPR2,DPP6,GRIN1,CACNA2D1,SLC44A1,DLG1,RYR2	In_3/4_up		GO:MF	N-terminal myristoylation domain binding	GO:0031997	0.000932915	3.03016	3	54	2	18602	CALM1,CALM3	Ex_3/4_down
GO:BP	amyloid fibril formation	GO:1990000	0.000688024	3.1624	19	124	4	18017	CLU,B2M,APOE,CRYAB	In_3/4_up		GO:MF	MHC protein complex binding	GO:0023023	0.00119723	2.92182	24	54	3	18602	HSP90AA1,HSP90AB1,PKM	Ex_3/4_down
GO:BP	cell part morphogenesis	GO:0032990	0.000721399	3.14182	716	124	17	18017	LINGO1,NEFL,YWHAH,UCHL1,CNP,SPP1,GAB1,APOE,UNC5D,CTNNA2,ZSWIM6,LAMA2,SHTN1,CAMK2B,ACTB,GRIN1,TNR	In_3/4_up		GO:MF	type 3 metabotropic glutamate receptor binding	GO:0031800	0.00119723	2.92182	4	54	2	18602	CALM1,CALM3	Ex_3/4_down
GO:BP	circulatory system process	GO:0003013	0.000831682	3.08004	649	124	16	18017	CTNNA3,ASIC2,APOE,SLC1A3,CACNA2D3,DOCK5,ATP1B1,ABCA2,SLC1A2,PDE4D,ITPR2,CACNA2D1,SLC44A1,SLCO3A1,DLG1,RYR2	In_3/4_up		GO:MF	AMPA glutamate receptor activity	GO:0004971	0.00119723	2.92182	4	54	2	18602	GRIA4,GRIA2	Ex_3/4_down
GO:BP	cellular component morphogenesis	GO:0032989	0.000886545	3.0523	812	124	18	18017	LINGO1,NEFL,YWHAH,UCHL1,CNP,SPP1,GAB1,APOE,UNC5D,CTNNA2,ZSWIM6,LAMA2,SHTN1,ABCA2,CAMK2B,ACTB,GRIN1,TNR	In_3/4_up		GO:MF	enzyme regulator activity	GO:0030234	0.00119723	2.92182	1056	54	12	18602	HSP90AA1,CHN1,PEBP1,CALM1,CALM3,PLCB1,HSP90AB1,GRM7,THY1,PRNP,PSAP,APP	Ex_3/4_down
GO:BP	regulation of cell morphogenesis involved in differentiation	GO:0010769	0.000886545	3.0523	313	124	11	18017	LINGO1,NEFL,YWHAH,SPP1,APOE,DOCK5,ZSWIM6,SHTN1,CAMK2B,GRIN1,TNR	In_3/4_up		GO:MF	ion channel binding	GO:0044325	0.00119723	2.92182	134	54	5	18602	CALM1,CALM3,YWHAH,HSP90AB1,PRNP	Ex_3/4_down
GO:BP	regulation of nervous system development	GO:0051960	0.000886545	3.0523	978	124	20	18017	LINGO1,NEFL,YWHAH,ASIC2,CBLN2,B2M,SPP1,APOE,ENC1,NDRG4,UNC5D,CTNNA2,ZSWIM6,SHTN1,CAMK2B,STMN2,GRIN1,MAN2A1,DLG1,TNR	In_3/4_up		GO:MF	glutamate receptor activity	GO:0008066	0.001455	2.83714	27	54	3	18602	GRIA4,GRM7,GRIA2	Ex_3/4_down
GO:BP	neuromuscular process	GO:0050905	0.000939802	3.02696	112	124	7	18017	NEFL,UCHL1,SLC1A3,CTNNA2,PCDH15,GRIN1,TNR	In_3/4_up		GO:MF	adenylate cyclase activator activity	GO:0010856	0.0017427	2.75878	5	54	2	18602	CALM1,CALM3	Ex_3/4_down
GO:BP	regulation of transmembrane transport	GO:0034762	0.000967585	3.01431	589	124	15	18017	NEFL,YWHAH,ASIC2,CACNA2D3,ATP1B1,KCNH8,DPP10,SLC1A2,PDE4D,ACTB,DPP6,GRIN1,CACNA2D1,DLG1,RYR2	In_3/4_up		GO:MF	calcium ion binding	GO:0005509	0.00408108	2.38923	719	54	9	18602	CALM1,CALM3,PLCB1,VSNL1,PPP3CA,DGKB,PCDH7,PRNP,TENM2	Ex_3/4_down
GO:BP	regulation of neuron migration	GO:2001222	0.00123609	2.90795	47	124	5	18017	UNC5D,CTNNA2,ZSWIM6,SHTN1,CAMK2B	In_3/4_up		GO:MF	TPR domain binding	GO:0030911	0.00408619	2.38868	8	54	2	18602	HSP90AA1,HSP90AB1	Ex_3/4_down
GO:BP	regulation of amyloid fibril formation	GO:1905906	0.00123609	2.90795	8	124	3	18017	CLU,APOE,CRYAB	In_3/4_up		GO:MF	ATP-dependent protein binding	GO:0043008	0.00408619	2.38868	8	54	2	18602	HSP90AB1,PRNP	Ex_3/4_down
GO:BP	movement of cell or subcellular component	GO:0006928	0.00171454	2.76585	2301	124	33	18017	NEFL,CTNNA3,GPC5,UCHL1,PTPRK,TMSB10,TF,ELMO1,GAB1,APOE,DOCK8,ASTN2,NDRG4,UNC5D,DOCK5,AGBL4,CTNNA2,ZSWIM6,LAMA2,SSH2,DYNLL1,ATP1B1,SHTN1,BCAS3,PDE4D,CAMK2B,ACTB,CACNA2D1,ATRNL1,LDLRAD4,DLG1,TNR,RYR2	In_3/4_up		GO:MF	tau protein binding	GO:0048156	0.00510198	2.29226	45	54	3	18602	HSP90AA1,HSP90AB1,ACTB	Ex_3/4_down
GO:BP	brain development	GO:0007420	0.00180368	2.74384	784	124	17	18017	NEFL,NRGN,YWHAH,PLP1,CNP,B2M,MBP,NDRG4,FAIM2,CTNNA2,ZSWIM6,DYNLL1,SLC1A2,ACTB,GRIN1,CKB,TNR	In_3/4_up		GO:MF	glutamate receptor binding	GO:0035254	0.00552972	2.2573	47	54	3	18602	CALM1,CALM3,PRNP	Ex_3/4_down
GO:BP	regulation of plasma membrane bounded cell projection organization	GO:0120035	0.00186096	2.73026	707	124	16	18017	LINGO1,NEFL,YWHAH,B2M,SPP1,APOE,ENC1,NDRG4,CTNNA2,ZSWIM6,SHTN1,BCAS3,CAMK2B,STMN2,GRIN1,TNR	In_3/4_up		GO:MF	cation channel activity	GO:0005261	0.00688717	2.16196	341	54	6	18602	SNAP25,GRIA4,KCND2,GPM6A,GRIA2,KCNQ5	Ex_3/4_down
GO:BP	transport across blood-brain barrier	GO:0150104	0.00194567	2.71093	87	124	6	18017	APOE,SLC1A3,ABCA2,SLC1A2,SLC44A1,SLCO3A1	In_3/4_up		GO:MF	structural constituent of postsynapse	GO:0099186	0.00857086	2.06698	13	54	2	18602	NEFL,ACTB	Ex_3/4_down
GO:BP	cell-cell signaling	GO:0007267	0.00194567	2.71093	1806	124	28	18017	NRGN,YWHAH,ASIC2,GPC5,GAPDH,PLCL1,SLC24A2,PLP1,CNP,CBLN2,GRM3,RNF220,SPP1,MBP,APOE,STXBP5L,SLC1A3,LAMA2,VSNL1,SLC1A2,CAMK2B,ITPR2,GRIN1,CACNA2D1,DLG1,TNR,DTNA,RYR2	In_3/4_up		GO:MF	protein phosphatase activator activity	GO:0072542	0.00857086	2.06698	13	54	2	18602	CALM1,CALM3	Ex_3/4_down
GO:BP	vascular transport	GO:0010232	0.0019595	2.70785	88	124	6	18017	APOE,SLC1A3,ABCA2,SLC1A2,SLC44A1,SLCO3A1	In_3/4_up		GO:MF	adenylate cyclase binding	GO:0008179	0.00857086	2.06698	13	54	2	18602	CALM1,CALM3	Ex_3/4_down
GO:BP	regulation of cellular component movement	GO:0051270	0.0019595	2.70785	1142	124	21	18017	CTNNA3,PTPRK,TMSB10,TF,GAB1,APOE,DOCK8,NDRG4,UNC5D,DOCK5,CTNNA2,ZSWIM6,LAMA2,SSH2,SHTN1,BCAS3,PDE4D,CAMK2B,LDLRAD4,DLG1,RYR2	In_3/4_up		GO:MF	titin binding	GO:0031432	0.00924143	2.03426	14	54	2	18602	CALM1,CALM3	Ex_3/4_down
GO:BP	modulation of chemical synaptic transmission	GO:0050804	0.0019595	2.70785	420	124	12	18017	NRGN,YWHAH,PLCL1,SLC24A2,GRM3,APOE,STXBP5L,SLC1A3,LAMA2,CAMK2B,GRIN1,TNR	In_3/4_up		GO:MF	amide binding	GO:0033218	0.00924143	2.03426	374	54	6	18602	GRIA4,HSP90AB1,PPP3CA,PRNP,GRIA2,PSAP	Ex_3/4_down
GO:BP	regulation of cell projection organization	GO:0031344	0.0019595	2.70785	717	124	16	18017	LINGO1,NEFL,YWHAH,B2M,SPP1,APOE,ENC1,NDRG4,CTNNA2,ZSWIM6,SHTN1,BCAS3,CAMK2B,STMN2,GRIN1,TNR	In_3/4_up		GO:MF	enzyme activator activity	GO:0008047	0.0094207	2.02592	526	54	7	18602	CHN1,CALM1,CALM3,PLCB1,THY1,PSAP,APP	Ex_3/4_down
GO:BP	regulation of trans-synaptic signaling	GO:0099177	0.00196753	2.70608	421	124	12	18017	NRGN,YWHAH,PLCL1,SLC24A2,GRM3,APOE,STXBP5L,SLC1A3,LAMA2,CAMK2B,GRIN1,TNR	In_3/4_up		GO:MF	anion binding	GO:0043168	0.0098169	2.00803	2870	54	18	18602	NRGN,HSP90AA1,PEBP1,CKB,MAP1B,PLCB1,HSP90AB1,SIK3,GRM7,NTRK2,THY1,DGKB,SEPT7,PKM,ACTB,TUBA1B,PSAP,APP	Ex_3/4_down
GO:BP	supramolecular fiber organization	GO:0097435	0.00212469	2.67271	727	124	16	18017	CLU,NEFL,TMSB10,TF,ELMO1,B2M,APOE,CTNNA2,SSH2,CRYAB,SHTN1,PCDH15,HIP1,NCKAP5,STMN2,DLG1	In_3/4_up		GO:MF	cell adhesion molecule binding	GO:0050839	0.0098169	2.00803	539	54	7	18602	RTN4,HSP90AB1,THY1,SEPT7,PKM,NRXN3,TENM2	Ex_3/4_down
GO:BP	ion transport	GO:0006811	0.00212469	2.67271	1730	124	27	18017	SLC26A3,NEFL,NKAIN2,YWHAH,ASIC2,TF,SLC24A2,SLC9A9,B2M,SLC5A11,APOE,SLC1A3,CACNA2D3,ATP1B1,KCNH8,DPP10,SLC1A2,PDE4D,CAMK2B,ITPR2,DPP6,GRIN1,CACNA2D1,SLC44A1,SLCO3A1,DLG1,RYR2	In_3/4_up		GO:MF	calcium-dependent protein binding	GO:0048306	0.0098169	2.00803	65	54	3	18602	CALM1,CALM3,SNAP25	Ex_3/4_down
GO:BP	transmembrane transport	GO:0055085	0.00212469	2.67271	1632	124	26	18017	CLU,SLC26A3,NEFL,YWHAH,ASIC2,SLC24A2,TMEM144,SLC9A9,SLC5A11,SLC1A3,CACNA2D3,ATP1B1,ABCA2,KCNH8,DPP10,SLC1A2,PDE4D,ACTB,ITPR2,DPP6,GRIN1,CACNA2D1,SLC44A1,SLCO3A1,DLG1,RYR2	In_3/4_up		GO:MF	ion binding	GO:0043167	0.0100237	1.99897	6335	54	30	18602	NRGN,HSP90AA1,CHN1,PEBP1,CALM1,CALM3,CKB,MAP1B,PLCB1,FTH1,VSNL1,HSP90AB1,SIK3,PPP3CA,GRM7,NTRK2,KCND2,THY1,DGKB,SEPT7,PKM,PCDH7,CHRM3,ACTB,NRXN3,PRNP,TENM2,TUBA1B,PSAP,APP	Ex_3/4_down
GO:BP	regulation of ion transmembrane transport	GO:0034765	0.00212469	2.67271	498	124	13	18017	NEFL,YWHAH,ASIC2,CACNA2D3,ATP1B1,KCNH8,DPP10,PDE4D,DPP6,GRIN1,CACNA2D1,DLG1,RYR2	In_3/4_up		GO:MF	phosphatase activator activity	GO:0019211	0.0109068	1.9623	17	54	2	18602	CALM1,CALM3	Ex_3/4_down
GO:BP	cell communication involved in cardiac conduction	GO:0086065	0.00216643	2.66425	56	124	5	18017	CTNNA3,ATP1B1,PDE4D,CACNA2D1,RYR2	In_3/4_up		GO:MF	lamin binding	GO:0005521	0.0109068	1.9623	17	54	2	18602	PLCB1,PRNP	Ex_3/4_down
GO:BP	system development	GO:0048731	0.00226403	2.64512	5096	124	56	18017	CLU,LINGO1,NEFL,NRGN,YWHAH,DHFR,ASIC2,UCHL1,PTPRK,CLDN11,SAT1,ADGRV1,TF,PLP1,KIAA1217,CNP,QDPR,CBLN2,B2M,SPP1,MBP,GAB1,CLMN,APOE,ENC1,ASTN2,SLC1A3,NDRG4,UNC5D,AGBL4,FAIM2,CTNNA2,APLP1,ZSWIM6,LAMA2,DYNLL1,CRYAB,PHLPP1,SHTN1,BCAS3,PCDH15,ABCA2,SLC1A2,MOBP,CAMK2B,ACTB,STMN2,NTM,GRIN1,ATRNL1,MAN2A1,CKB,LDLRAD4,DLG1,TNR,RYR2	In_3/4_up		GO:MF	DNA polymerase binding	GO:0070182	0.0118974	1.92455	18	54	2	18602	HSP90AA1,HSP90AB1	Ex_3/4_down
GO:BP	regulation of axonogenesis	GO:0050770	0.00251548	2.59938	189	124	8	18017	LINGO1,NEFL,SPP1,APOE,ZSWIM6,SHTN1,GRIN1,TNR	In_3/4_up		GO:MF	amyloid-beta binding	GO:0001540	0.0128226	1.89202	76	54	3	18602	GRIA4,PRNP,GRIA2	Ex_3/4_down
GO:BP	regulation of blood circulation	GO:1903522	0.0025593	2.59188	306	124	10	18017	CTNNA3,ASIC2,CACNA2D3,DOCK5,ATP1B1,PDE4D,ITPR2,CACNA2D1,DLG1,RYR2	In_3/4_up		GO:MF	ionotropic glutamate receptor activity	GO:0004970	0.0128226	1.89202	19	54	2	18602	GRIA4,GRIA2	Ex_3/4_down
GO:BP	head development	GO:0060322	0.00263357	2.57946	829	124	17	18017	NEFL,NRGN,YWHAH,PLP1,CNP,B2M,MBP,NDRG4,FAIM2,CTNNA2,ZSWIM6,DYNLL1,SLC1A2,ACTB,GRIN1,CKB,TNR	In_3/4_up		GO:MF	ubiquitin protein ligase binding	GO:0031625	0.0138573	1.85832	292	54	5	18602	RTN4,HSP90AA1,CKB,HSP90AB1,TUBA1B	Ex_3/4_down
GO:BP	negative regulation of cellular component organization	GO:0051129	0.0027537	2.56008	750	124	16	18017	CLU,LINGO1,YWHAH,TMSB10,B2M,SPP1,APOE,IQCJ-SCHIP1,CTNNA2,SSH2,CRYAB,BCAS3,ABCA2,STMN2,LDLRAD4,TNR	In_3/4_up		GO:MF	carbohydrate derivative binding	GO:0097367	0.0138629	1.85815	2277	54	15	18602	HSP90AA1,PEBP1,CKB,HSP90AB1,SIK3,NTRK2,THY1,DGKB,SEPT7,PKM,ACTB,PRNP,TUBA1B,PSAP,APP	Ex_3/4_down
GO:BP	cell adhesion	GO:0007155	0.00285432	2.5445	1475	124	24	18017	CTNNA3,PTPRK,CLDN11,ADGRV1,APBB1IP,SPP1,MBP,DOCK8,ASTN2,UNC5D,DOCK5,CTNNA2,APLP1,LAMA2,ATP1B1,PDZD2,BCAS3,PCDH15,ACTB,NTM,ATRNL1,DLG1,TNR,PCDH9	In_3/4_up		GO:MF	ion channel activity	GO:0005216	0.0138629	1.85815	438	54	6	18602	SNAP25,GRIA4,KCND2,GPM6A,GRIA2,KCNQ5	Ex_3/4_down
GO:BP	system process	GO:0003008	0.00298262	2.5254	2303	124	32	18017	SLC26A3,NEFL,NRGN,CTNNA3,ASIC2,UCHL1,ADGRV1,SLC24A2,B2M,MBP,APOE,SLC1A3,NDRG4,CACNA2D3,DOCK5,CTNNA2,CRYAB,ATP1B1,PCDH15,ABCA2,SLC1A2,PDE4D,CAMK2B,ITPR2,GRIN1,CACNA2D1,SLC44A1,SLCO3A1,DLG1,TNR,DTNA,RYR2	In_3/4_up		GO:MF	peptide binding	GO:0042277	0.015104	1.82091	303	54	5	18602	GRIA4,HSP90AB1,PPP3CA,PRNP,GRIA2	Ex_3/4_down
GO:BP	biological adhesion	GO:0022610	0.00298262	2.5254	1482	124	24	18017	CTNNA3,PTPRK,CLDN11,ADGRV1,APBB1IP,SPP1,MBP,DOCK8,ASTN2,UNC5D,DOCK5,CTNNA2,APLP1,LAMA2,ATP1B1,PDZD2,BCAS3,PCDH15,ACTB,NTM,ATRNL1,DLG1,TNR,PCDH9	In_3/4_up		GO:MF	phospholipid binding	GO:0005543	0.0154767	1.81032	452	54	6	18602	NRGN,PEBP1,MAP1B,PLCB1,THY1,PSAP	Ex_3/4_down
GO:BP	regulation of multicellular organismal process	GO:0051239	0.00310308	2.50821	3441	124	42	18017	CLU,LINGO1,NEFL,YWHAH,CTNNA3,ASIC2,GAPDH,ADGRV1,PLCL1,TF,POLR2F,CBLN2,B2M,SPP1,MBP,GAB1,APOE,ENC1,PTGDS,NDRG4,CACNA2D3,UNC5D,DOCK5,AGBL4,CTNNA2,ZSWIM6,LAMA2,PHLPP1,ATP1B1,SHTN1,BCAS3,PDE4D,CAMK2B,STMN2,ITPR2,GRIN1,CACNA2D1,MAN2A1,LDLRAD4,DLG1,TNR,RYR2	In_3/4_up		GO:MF	ubiquitin-like protein ligase binding	GO:0044389	0.0159109	1.79831	310	54	5	18602	RTN4,HSP90AA1,CKB,HSP90AB1,TUBA1B	Ex_3/4_down
GO:BP	cardiac conduction	GO:0061337	0.00318582	2.49678	147	124	7	18017	CTNNA3,CACNA2D3,ATP1B1,PDE4D,ITPR2,CACNA2D1,RYR2	In_3/4_up		GO:MF	kinase activity	GO:0016301	0.0166829	1.77773	808	54	8	18602	NRGN,CALM1,CALM3,CKB,SIK3,NTRK2,DGKB,PKM	Ex_3/4_down
GO:BP	inorganic cation transmembrane transport	GO:0098662	0.0034797	2.45846	771	124	16	18017	YWHAH,ASIC2,SLC24A2,SLC9A9,SLC1A3,CACNA2D3,ATP1B1,KCNH8,DPP10,PDE4D,ITPR2,DPP6,GRIN1,CACNA2D1,DLG1,RYR2	In_3/4_up		GO:MF	voltage-gated potassium channel activity	GO:0005249	0.017122	1.76644	90	54	3	18602	SNAP25,KCND2,KCNQ5	Ex_3/4_down
GO:BP	cytoskeleton organization	GO:0007010	0.0035611	2.44842	1407	124	23	18017	NEFL,TUBA1B,GAPDH,TMSB10,TF,ELMO1,CNP,GAB1,APOE,C10ORF90,IQCJ-SCHIP1,CTNNA2,SSH2,CRYAB,MAP7,SHTN1,BCAS3,PCDH15,HIP1,ACTB,NCKAP5,STMN2,DLG1	In_3/4_up		GO:MF	ganglioside GP1c binding	GO:1905577	0.0172142	1.76411	1	54	1	18602	PSAP	Ex_3/4_down
GO:BP	regulation of neuron differentiation	GO:0045664	0.0036084	2.44269	693	124	15	18017	LINGO1,NEFL,YWHAH,B2M,SPP1,APOE,ENC1,NDRG4,CTNNA2,ZSWIM6,SHTN1,CAMK2B,STMN2,GRIN1,TNR	In_3/4_up		GO:MF	glycolipid binding	GO:0051861	0.0172142	1.76411	25	54	2	18602	THY1,PSAP	Ex_3/4_down
GO:BP	behavior	GO:0007610	0.00361675	2.44168	615	124	14	18017	NRGN,UCHL1,SLC24A2,CNP,B2M,APOE,SLC1A3,PTGDS,NDRG4,PCDH15,ABCA2,SLC1A2,GRIN1,TNR	In_3/4_up		GO:MF	brain-derived neurotrophic factor-activated receptor activity	GO:0060175	0.0172142	1.76411	1	54	1	18602	NTRK2	Ex_3/4_down
GO:BP	inorganic ion transmembrane transport	GO:0098660	0.00361675	2.44168	862	124	17	18017	SLC26A3,YWHAH,ASIC2,SLC24A2,SLC9A9,SLC1A3,CACNA2D3,ATP1B1,KCNH8,DPP10,PDE4D,ITPR2,DPP6,GRIN1,CACNA2D1,DLG1,RYR2	In_3/4_up		GO:MF	protein folding chaperone	GO:0044183	0.0172142	1.76411	27	54	2	18602	HSP90AA1,HSP90AB1	Ex_3/4_down
GO:BP	multicellular organismal signaling	GO:0035637	0.0037332	2.42792	206	124	8	18017	CTNNA3,CACNA2D3,ATP1B1,PDE4D,ITPR2,CACNA2D1,TNR,RYR2	In_3/4_up		GO:MF	ganglioside GM3 binding	GO:1905575	0.0172142	1.76411	1	54	1	18602	PSAP	Ex_3/4_down
GO:BP	regulation of neurogenesis	GO:0050767	0.00377343	2.42326	867	124	17	18017	LINGO1,NEFL,YWHAH,B2M,SPP1,APOE,ENC1,NDRG4,UNC5D,CTNNA2,ZSWIM6,SHTN1,CAMK2B,STMN2,GRIN1,MAN2A1,TNR	In_3/4_up		GO:MF	calmodulin binding	GO:0005516	0.0172142	1.76411	202	54	4	18602	NRGN,PLCB1,PPP3CA,KCNQ5	Ex_3/4_down
GO:BP	regulation of system process	GO:0044057	0.00403505	2.39415	624	124	14	18017	CTNNA3,ASIC2,APOE,CACNA2D3,DOCK5,ATP1B1,PDE4D,CAMK2B,ITPR2,GRIN1,CACNA2D1,DLG1,TNR,RYR2	In_3/4_up		GO:MF	gated channel activity	GO:0022836	0.0172142	1.76411	341	54	5	18602	SNAP25,GRIA4,KCND2,GRIA2,KCNQ5	Ex_3/4_down
GO:BP	import across plasma membrane	GO:0098739	0.00403505	2.39415	156	124	7	18017	SLC24A2,SLC9A9,SLC1A3,ATP1B1,SLC1A2,CACNA2D1,DLG1	In_3/4_up		GO:MF	passive transmembrane transporter activity	GO:0022803	0.0172142	1.76411	488	54	6	18602	SNAP25,GRIA4,KCND2,GPM6A,GRIA2,KCNQ5	Ex_3/4_down
GO:BP	negative regulation of neuron projection development	GO:0010977	0.00403505	2.39415	156	124	7	18017	LINGO1,YWHAH,B2M,SPP1,APOE,STMN2,TNR	In_3/4_up		GO:MF	identical protein binding	GO:0042802	0.0172142	1.76411	1937	54	13	18602	HSP90AA1,PLCB1,YWHAH,HSP90AB1,NEFL,NTRK2,SEPT7,PKM,ACTB,PRNP,TENM2,PSAP,APP	Ex_3/4_down
GO:BP	negative regulation of supramolecular fiber organization	GO:1902904	0.00466616	2.33104	160	124	7	18017	CLU,TMSB10,APOE,CTNNA2,SSH2,CRYAB,STMN2	In_3/4_up		GO:MF	phosphatidylinositol phospholipase C activity	GO:0004435	0.0172142	1.76411	26	54	2	18602	PLCB1,CHRM3	Ex_3/4_down
GO:BP	cation transmembrane transport	GO:0098655	0.0050228	2.29905	894	124	17	18017	NEFL,YWHAH,ASIC2,SLC24A2,SLC9A9,SLC1A3,CACNA2D3,ATP1B1,KCNH8,DPP10,PDE4D,ITPR2,DPP6,GRIN1,CACNA2D1,DLG1,RYR2	In_3/4_up		GO:MF	channel activity	GO:0015267	0.0172142	1.76411	487	54	6	18602	SNAP25,GRIA4,KCND2,GPM6A,GRIA2,KCNQ5	Ex_3/4_down
GO:BP	axonal transport of mitochondrion	GO:0019896	0.0050228	2.29905	15	124	3	18017	NEFL,UCHL1,AGBL4	In_3/4_up		GO:MF	CTP binding	GO:0002135	0.0172142	1.76411	1	54	1	18602	HSP90AB1	Ex_3/4_down
GO:BP	cyclic nucleotide catabolic process	GO:0009214	0.0050228	2.29905	15	124	3	18017	CNP,PDE1A,PDE4D	In_3/4_up		GO:MF	ganglioside GM2 binding	GO:1905574	0.0172142	1.76411	1	54	1	18602	PSAP	Ex_3/4_down
GO:BP	regulation of transmembrane transporter activity	GO:0022898	0.0050228	2.29905	279	124	9	18017	NEFL,YWHAH,ATP1B1,PDE4D,ACTB,GRIN1,CACNA2D1,DLG1,RYR2	In_3/4_up		GO:MF	structural constituent of presynapse	GO:0099181	0.0172142	1.76411	1	54	1	18602	PPFIA2	Ex_3/4_down
GO:BP	positive regulation of low-density lipoprotein particle receptor catabolic process	GO:0032805	0.00511025	2.29156	3	124	2	18017	APOE,ABCA2	In_3/4_up		GO:MF	phospholipase C activity	GO:0004629	0.0172142	1.76411	28	54	2	18602	PLCB1,CHRM3	Ex_3/4_down
GO:BP	actin filament-based process	GO:0030029	0.00511037	2.29155	813	124	16	18017	CTNNA3,TMSB10,TF,ELMO1,GAB1,CTNNA2,SSH2,SHTN1,BCAS3,PCDH15,PDE4D,HIP1,ACTB,CACNA2D1,DLG1,RYR2	In_3/4_up		GO:MF	protein kinase binding	GO:0019901	0.0172304	1.7637	670	54	7	18602	HSP90AA1,PEBP1,CALM1,CALM3,HSP90AB1,THY1,ACTB	Ex_3/4_down
GO:BP	localization	GO:0051179	0.00511037	2.29155	6920	124	68	18017	CLU,SLC26A3,NEFL,TUBA1B,NKAIN2,YWHAH,CTNNA3,ASIC2,GPC5,UCHL1,PTPRK,GAPDH,ADGRV1,TMSB10,TF,SLC24A2,TMEM144,ELMO1,CNP,SLC9A9,B2M,SPP1,SLC5A11,GAB1,CLMN,APOE,STXBP5L,DOCK8,ASTN2,SLC1A3,PTGDS,NDRG4,CACNA2D3,UNC5D,DOCK5,AGBL4,SMYD3,CTNNA2,APLP1,ZSWIM6,LAMA2,SSH2,DYNLL1,VSNL1,CRYAB,MAP7,ATP1B1,SHTN1,BCAS3,ABCA2,KCNH8,DPP10,SLC1A2,PDE4D,HIP1,CAMK2B,ACTB,ITPR2,DPP6,GRIN1,CACNA2D1,ATRNL1,SLC44A1,SLCO3A1,L…	In_3/4_up		GO:MF	drug binding	GO:0008144	0.0177236	1.75145	102	54	3	18602	HSP90AB1,PPP3CA,CHRM3	Ex_3/4_down
GO:BP	synapse organization	GO:0050808	0.00511037	2.29155	417	124	11	18017	NEFL,ASIC2,CBLN2,APOE,CTNNA2,CAMK2B,ACTB,GRIN1,LRRTM4,DLG1,TNR	In_3/4_up		GO:MF	actin monomer binding	GO:0003785	0.018136	1.74146	30	54	2	18602	TMSB4X,TMSB10	Ex_3/4_down
GO:BP	cardiac muscle cell contraction	GO:0086003	0.0053345	2.27291	74	124	5	18017	CTNNA3,PDE4D,CACNA2D1,DLG1,RYR2	In_3/4_up		GO:MF	structural constituent of cytoskeleton	GO:0005200	0.018136	1.74146	104	54	3	18602	NEFL,ACTB,TUBA1B	Ex_3/4_down
GO:BP	cardiac muscle cell action potential	GO:0086001	0.0053345	2.27291	74	124	5	18017	CTNNA3,ATP1B1,CACNA2D1,DLG1,RYR2	In_3/4_up		GO:MF	phosphatidylinositol 3-kinase binding	GO:0043548	0.0190056	1.72112	31	54	2	18602	CALM1,CALM3	Ex_3/4_down
GO:BP	potassium ion transmembrane transport	GO:0071805	0.0053345	2.27291	223	124	8	18017	SLC24A2,SLC9A9,SLC1A3,ATP1B1,KCNH8,DPP10,DPP6,DLG1	In_3/4_up		GO:MF	neurotransmitter receptor activity	GO:0030594	0.0200686	1.69748	109	54	3	18602	GRIA4,CHRM3,GRIA2	Ex_3/4_down
GO:BP	sodium ion transport	GO:0006814	0.00558244	2.25318	225	124	8	18017	NKAIN2,YWHAH,ASIC2,SLC24A2,SLC9A9,SLC5A11,ATP1B1,DLG1	In_3/4_up		GO:MF	protein domain specific binding	GO:0019904	0.0222482	1.65271	714	54	7	18602	HSP90AA1,CALM1,CALM3,YWHAH,HSP90AB1,NEFL,APP	Ex_3/4_down
GO:BP	import into cell	GO:0098657	0.00563064	2.24944	226	124	8	18017	SLC24A2,SLC9A9,SLC1A3,ATP1B1,SLC1A2,ACTB,CACNA2D1,DLG1	In_3/4_up		GO:MF	voltage-gated ion channel activity involved in regulation of postsynaptic membrane potential	GO:1905030	0.0258602	1.58737	2	54	1	18602	KCND2	Ex_3/4_down
GO:BP	signaling	GO:0023052	0.00563064	2.24944	6814	124	67	18017	CLU,SPARCL1,RASGEF1B,NEFL,NRGN,YWHAH,CTNNA3,ASIC2,PSD3,GPC5,UCHL1,PTPRK,GAPDH,MTRNR2L8,ADGRV1,PLCL1,TF,MTRNR2L12,SLC24A2,PLP1,POLR2F,ELMO1,CNP,OTUD7A,CBLN2,B2M,GRM3,RNF220,APBB1IP,SPP1,MBP,GAB1,MAML2,PDE1A,APOE,STXBP5L,DOCK8,SLC1A3,NDRG4,ST18,CACNA2D3,UNC5D,DOCK5,FAIM2,APLP1,LAMA2,VSNL1,CRYAB,PHLPP1,ATP1B1,SHTN1,SLC1A2,PDE4D,HIP1,CAMK2B,ACTB,ITPR2,ARAP2,FHIT,GRIN1,CACNA2D1,ATRNL1,LDLRAD4,DLG1,TNR…	In_3/4_up		GO:MF	protein serine/threonine kinase activator activity	GO:0043539	0.0258602	1.58737	39	54	2	18602	CALM1,CALM3	Ex_3/4_down
GO:BP	regulation of cell development	GO:0060284	0.00582866	2.23443	1006	124	18	18017	LINGO1,NEFL,YWHAH,B2M,SPP1,APOE,ENC1,NDRG4,UNC5D,DOCK5,CTNNA2,ZSWIM6,SHTN1,CAMK2B,STMN2,GRIN1,MAN2A1,TNR	In_3/4_up		GO:MF	potassium channel activity	GO:0005267	0.0258602	1.58737	125	54	3	18602	SNAP25,KCND2,KCNQ5	Ex_3/4_down
GO:BP	regulation of cation transmembrane transport	GO:1904062	0.00584662	2.2331	357	124	10	18017	NEFL,YWHAH,ATP1B1,DPP10,PDE4D,DPP6,GRIN1,CACNA2D1,DLG1,RYR2	In_3/4_up		GO:MF	ganglioside GM1 binding	GO:1905573	0.0258602	1.58737	2	54	1	18602	PSAP	Ex_3/4_down
GO:BP	retina homeostasis	GO:0001895	0.00597184	2.22389	77	124	5	18017	ADGRV1,TF,B2M,PCDH15,ACTB	In_3/4_up		GO:MF	adenylate cyclase regulator activity	GO:0010854	0.0258602	1.58737	2	54	1	18602	GRM7	Ex_3/4_down
GO:BP	positive regulation of synaptic transmission	GO:0050806	0.00597184	2.22389	172	124	7	18017	NRGN,SLC24A2,APOE,SLC1A3,LAMA2,GRIN1,TNR	In_3/4_up		GO:MF	pyruvate kinase activity	GO:0004743	0.0258602	1.58737	2	54	1	18602	PKM	Ex_3/4_down
GO:BP	regulation of cell morphogenesis	GO:0022604	0.00607518	2.21644	506	124	12	18017	LINGO1,NEFL,YWHAH,SPP1,APOE,DOCK5,ZSWIM6,SHTN1,CAMK2B,GRIN1,DLG1,TNR	In_3/4_up		GO:MF	adenylate cyclase inhibitor activity	GO:0010855	0.0258602	1.58737	2	54	1	18602	GRM7	Ex_3/4_down
GO:BP	regulation of transporter activity	GO:0032409	0.00618121	2.20893	294	124	9	18017	NEFL,YWHAH,ATP1B1,PDE4D,ACTB,GRIN1,CACNA2D1,DLG1,RYR2	In_3/4_up		GO:MF	UTP binding	GO:0002134	0.0258602	1.58737	2	54	1	18602	HSP90AB1	Ex_3/4_down
GO:BP	actin-mediated cell contraction	GO:0070252	0.00634564	2.19752	123	124	6	18017	CTNNA3,SHTN1,PDE4D,CACNA2D1,DLG1,RYR2	In_3/4_up		GO:MF	sulfonylurea receptor binding	GO:0017098	0.0258602	1.58737	2	54	1	18602	HSP90AB1	Ex_3/4_down
GO:BP	regulation of cardiac muscle cell contraction	GO:0086004	0.00649079	2.1877	43	124	4	18017	CTNNA3,PDE4D,DLG1,RYR2	In_3/4_up		GO:MF	kinase binding	GO:0019900	0.026167	1.58225	755	54	7	18602	HSP90AA1,PEBP1,CALM1,CALM3,HSP90AB1,THY1,ACTB	Ex_3/4_down
GO:BP	striated muscle contraction	GO:0006941	0.00722233	2.14132	179	124	7	18017	CTNNA3,ATP1B1,PDE4D,CACNA2D1,DLG1,DTNA,RYR2	In_3/4_up		GO:MF	transferase activity, transferring phosphorus-containing groups	GO:0016772	0.027442	1.56158	964	54	8	18602	NRGN,CALM1,CALM3,CKB,SIK3,NTRK2,DGKB,PKM	Ex_3/4_down
GO:BP	regulation of biological quality	GO:0065008	0.00755929	2.12152	4133	124	46	18017	CLU,SLC26A3,NEFL,NRGN,YWHAH,CTNNA3,ASIC2,GAPDH,ADGRV1,TMSB10,PLCL1,TF,SLC24A2,CNP,SLC9A9,CBLN2,B2M,SPP1,MBP,APOE,C10ORF90,STXBP5L,DOCK8,SLC1A3,DOCK5,CTNNA2,LAMA2,SSH2,VSNL1,CRYAB,ATP1B1,SHTN1,PCDH15,ABCA2,KCNH8,PDE4D,HIP1,CAMK2B,ACTB,ITPR2,GRIN1,CACNA2D1,CKB,DLG1,TNR,RYR2	In_3/4_up		GO:MF	lipid binding	GO:0008289	0.0299237	1.52398	778	54	7	18602	NRGN,PEBP1,MAP1B,PLCB1,THY1,DGKB,PSAP	Ex_3/4_down
GO:BP	D-aspartate import across plasma membrane	GO:0070779	0.00806272	2.09352	4	124	2	18017	SLC1A3,SLC1A2	In_3/4_up		GO:MF	protease binding	GO:0002020	0.0318609	1.49674	138	54	3	18602	NTRK2,PRNP,PSAP	Ex_3/4_down
GO:BP	D-aspartate transport	GO:0070777	0.00806272	2.09352	4	124	2	18017	SLC1A3,SLC1A2	In_3/4_up		GO:MF	inorganic cation transmembrane transporter activity	GO:0022890	0.0319333	1.49576	600	54	6	18602	SNAP25,GRIA4,KCND2,GPM6A,GRIA2,KCNQ5	Ex_3/4_down
GO:BP	positive regulation of amyloid fibril formation	GO:1905908	0.00806272	2.09352	4	124	2	18017	CLU,APOE	In_3/4_up		GO:MF	pyrimidine ribonucleotide binding	GO:0032557	0.0319985	1.49487	3	54	1	18602	HSP90AB1	Ex_3/4_down
GO:BP	regulation of ventricular cardiac muscle cell action potential	GO:0098911	0.00806582	2.09335	19	124	3	18017	CTNNA3,DLG1,RYR2	In_3/4_up		GO:MF	voltage-gated cation channel activity	GO:0022843	0.0319985	1.49487	142	54	3	18602	SNAP25,KCND2,KCNQ5	Ex_3/4_down
GO:BP	regulation of cardiac muscle contraction	GO:0055117	0.00806582	2.09335	84	124	5	18017	CTNNA3,ATP1B1,PDE4D,DLG1,RYR2	In_3/4_up		GO:MF	calcium channel regulator activity	GO:0005246	0.0319985	1.49487	47	54	2	18602	CALM1,NRXN3	Ex_3/4_down
GO:BP	positive regulation of transport	GO:0051050	0.00881617	2.05472	961	124	17	18017	CLU,YWHAH,GAPDH,TF,B2M,SPP1,APOE,VSNL1,ATP1B1,BCAS3,SLC1A2,HIP1,ACTB,GRIN1,CACNA2D1,DLG1,RYR2	In_3/4_up		GO:MF	brain-derived neurotrophic factor binding	GO:0048403	0.0319985	1.49487	3	54	1	18602	NTRK2	Ex_3/4_down
GO:BP	regulation of actin filament-based movement	GO:1903115	0.00909057	2.04141	48	124	4	18017	CTNNA3,PDE4D,DLG1,RYR2	In_3/4_up		GO:MF	ganglioside GT1b binding	GO:1905576	0.0319985	1.49487	3	54	1	18602	PSAP	Ex_3/4_down
GO:BP	potassium ion transport	GO:0006813	0.00909057	2.04141	249	124	8	18017	SLC24A2,SLC9A9,SLC1A3,ATP1B1,KCNH8,DPP10,DPP6,DLG1	In_3/4_up		GO:MF	dATP binding	GO:0032564	0.0319985	1.49487	3	54	1	18602	HSP90AB1	Ex_3/4_down
GO:BP	cell junction organization	GO:0034330	0.00936572	2.02846	703	124	14	18017	NEFL,ASIC2,PTPRK,CLDN11,CBLN2,APOE,CTNNA2,BCAS3,CAMK2B,ACTB,GRIN1,LRRTM4,DLG1,TNR	In_3/4_up		GO:MF	PTB domain binding	GO:0051425	0.0319985	1.49487	3	54	1	18602	APP	Ex_3/4_down
GO:BP	negative regulation of cell projection organization	GO:0031345	0.00936572	2.02846	190	124	7	18017	LINGO1,YWHAH,B2M,SPP1,APOE,STMN2,TNR	In_3/4_up		GO:MF	heparan sulfate 6-O-sulfotransferase activity	GO:0017095	0.0319985	1.49487	3	54	1	18602	HS6ST3	Ex_3/4_down
GO:BP	cell communication	GO:0007154	0.00948493	2.02297	6828	124	66	18017	CLU,SPARCL1,RASGEF1B,NEFL,NRGN,YWHAH,CTNNA3,ASIC2,PSD3,GPC5,UCHL1,PTPRK,GAPDH,MTRNR2L8,ADGRV1,PLCL1,TF,MTRNR2L12,SLC24A2,PLP1,POLR2F,ELMO1,CNP,OTUD7A,CBLN2,B2M,GRM3,RNF220,APBB1IP,SPP1,MBP,GAB1,MAML2,PDE1A,APOE,STXBP5L,DOCK8,SLC1A3,NDRG4,ST18,UNC5D,DOCK5,FAIM2,APLP1,LAMA2,VSNL1,CRYAB,PHLPP1,ATP1B1,SHTN1,SLC1A2,PDE4D,HIP1,CAMK2B,ACTB,ITPR2,ARAP2,FHIT,GRIN1,CACNA2D1,ATRNL1,LDLRAD4,DLG1,TNR,DTNA,RYR2	In_3/4_up		GO:MF	actin binding	GO:0003779	0.0319985	1.49487	437	54	5	18602	TMSB4X,TMSB10,ENC1,MAP1B,YWHAH	Ex_3/4_down
GO:BP	anatomical structure development	GO:0048856	0.00948493	2.02297	6143	124	61	18017	CLU,SPARCL1,LINGO1,SLC26A3,NEFL,NRGN,YWHAH,DHFR,ASIC2,UCHL1,PTPRK,CLDN11,SAT1,ADGRV1,TF,PLP1,KIAA1217,CNP,QDPR,CBLN2,B2M,SPP1,MBP,GAB1,CLMN,APOE,ENC1,ASTN2,SLC1A3,NDRG4,UNC5D,DOCK5,AGBL4,FAIM2,SMYD3,CTNNA2,APLP1,ZSWIM6,LAMA2,DYNLL1,CRYAB,PHLPP1,SHTN1,BCAS3,PCDH15,ABCA2,SLC1A2,MOBP,PDE4D,CAMK2B,ACTB,STMN2,NTM,GRIN1,ATRNL1,MAN2A1,CKB,LDLRAD4,DLG1,TNR,RYR2	In_3/4_up		GO:MF	signaling receptor binding	GO:0005102	0.0319985	1.49487	1674	54	11	18602	CCK,CHN1,CALM1,CALM3,YWHAH,HSP90AB1,THY1,NRXN3,PRNP,PSAP,APP	Ex_3/4_down
GO:BP	monovalent inorganic cation transport	GO:0015672	0.00991523	2.0037	544	124	12	18017	NKAIN2,YWHAH,ASIC2,SLC24A2,SLC9A9,SLC5A11,SLC1A3,ATP1B1,KCNH8,DPP10,DPP6,DLG1	In_3/4_up		GO:MF	structural constituent of postsynaptic intermediate filament cytoskeleton	GO:0099184	0.0319985	1.49487	3	54	1	18602	NEFL	Ex_3/4_down
GO:CC	cell junction	GO:0030054	1.02638e-07	6.98869	2058	127	40	18956	CLU,NEFL,NRGN,YWHAH,CTNNA3,ASIC2,PSD3,PTPRK,CLDN11,ADGRV1,PLP1,CNP,CBLN2,B2M,GRM3,APBB1IP,MBP,PNISR,GAB1,APOE,STXBP5L,SLC1A3,FAIM2,CTNNA2,LAMA2,CRYAB,FRMD4B,ATP1B1,PDZD2,PCDH15,SLC1A2,HIP1,CAMK2B,ACTB,GRIN1,LRRTM4,DLG1,TNR,DTNA,PCDH9	In_3/4_up		GO:MF	channel regulator activity	GO:0016247	0.0325709	1.48717	147	54	3	18602	CALM1,YWHAH,NRXN3	Ex_3/4_down
GO:CC	cell projection	GO:0042995	1.44667e-07	6.83963	2353	127	42	18956	CLU,SLC26A3,NEFL,NRGN,CTNNA3,ASIC2,PSD3,UCHL1,PTPRK,CLDN11,ADGRV1,CNP,QDPR,GRM3,APBB1IP,SPP1,MBP,APOE,DOCK8,SLC1A3,NDRG4,AGBL4,IQCJ-SCHIP1,CTNNA2,ZSWIM6,LAMA2,DYNLL1,CRYAB,FRMD4B,MAP7,ATP1B1,SHTN1,PCDH15,SLC1A2,CAMK2B,ACTB,STMN2,GRIN1,CKB,DLG1,DTNA,PCDH9	In_3/4_up		GO:MF	protein-containing complex binding	GO:0044877	0.0362834	1.44029	1268	54	9	18602	HSP90AA1,MAP1B,HSP90AB1,PPP3CA,NEFL,THY1,PKM,ACTB,PRNP	Ex_3/4_down
GO:CC	plasma membrane bounded cell projection	GO:0120025	1.44667e-07	6.83963	2256	127	41	18956	CLU,SLC26A3,NEFL,NRGN,CTNNA3,ASIC2,PSD3,UCHL1,PTPRK,CLDN11,ADGRV1,CNP,QDPR,GRM3,APBB1IP,MBP,APOE,DOCK8,SLC1A3,NDRG4,AGBL4,IQCJ-SCHIP1,CTNNA2,ZSWIM6,LAMA2,DYNLL1,CRYAB,FRMD4B,MAP7,ATP1B1,SHTN1,PCDH15,SLC1A2,CAMK2B,ACTB,STMN2,GRIN1,CKB,DLG1,DTNA,PCDH9	In_3/4_up		GO:MF	G protein-coupled receptor binding	GO:0001664	0.0362834	1.44029	292	54	4	18602	CALM1,CALM3,PRNP,PSAP	Ex_3/4_down
GO:CC	neuron projection	GO:0043005	2.14483e-07	6.66861	1396	127	31	18956	CLU,NEFL,NRGN,ASIC2,UCHL1,PTPRK,CLDN11,ADGRV1,QDPR,GRM3,MBP,APOE,SLC1A3,AGBL4,IQCJ-SCHIP1,CTNNA2,ZSWIM6,LAMA2,CRYAB,MAP7,SHTN1,PCDH15,SLC1A2,CAMK2B,ACTB,STMN2,GRIN1,CKB,DLG1,DTNA,PCDH9	In_3/4_up		GO:MF	adenyl deoxyribonucleotide binding	GO:0032558	0.0375267	1.42566	4	54	1	18602	HSP90AB1	Ex_3/4_down
GO:CC	cell periphery	GO:0071944	4.29703e-07	6.36683	5768	127	70	18956	CLU,LINGO1,SLC26A3,NRGN,NKAIN2,YWHAH,ASIC2,PSD3,GPC5,UCHL1,PTPRK,CLDN11,GAPDH,ADGRV1,PLCL1,TF,SLC24A2,PLP1,ELMO1,CNP,SLC9A9,B2M,GRM3,APBB1IP,SLC5A11,MBP,PNISR,APOE,C10ORF90,STXBP5L,DOCK8,ASTN2,SLC1A3,NDRG4,CACNA2D3,UNC5D,DOCK5,FAIM2,CTNNA2,APLP1,LAMA2,DYNLL1,CRYAB,PHLPP1,MAP7,ATP1B1,BCAS3,PCDH15,ABCA2,KCNH8,DPP10,SLC1A2,MOBP,PDE4D,HIP1,ACTB,ENOX1,ITPR2,DPP6,FHIT,NTM,GRIN1,CACNA2D1,SLC44A1,SLCO3A1…	In_3/4_up		GO:MF	potassium ion transmembrane transporter activity	GO:0015079	0.0375267	1.42566	162	54	3	18602	SNAP25,KCND2,KCNQ5	Ex_3/4_down
GO:CC	synapse	GO:0045202	4.29703e-07	6.36683	1293	127	29	18956	CLU,NEFL,NRGN,ASIC2,PSD3,ADGRV1,PLP1,CNP,CBLN2,GRM3,MBP,PNISR,APOE,STXBP5L,SLC1A3,FAIM2,CTNNA2,LAMA2,CRYAB,PCDH15,SLC1A2,HIP1,CAMK2B,ACTB,GRIN1,LRRTM4,DLG1,TNR,DTNA	In_3/4_up		GO:MF	neurotrophin receptor activity	GO:0005030	0.0375267	1.42566	4	54	1	18602	NTRK2	Ex_3/4_down
GO:CC	axon	GO:0030424	9.28958e-07	6.032	658	127	20	18956	NEFL,NRGN,UCHL1,PTPRK,CLDN11,GRM3,MBP,AGBL4,IQCJ-SCHIP1,CTNNA2,CRYAB,MAP7,SHTN1,SLC1A2,ACTB,STMN2,GRIN1,DLG1,DTNA,PCDH9	In_3/4_up		GO:MF	structural constituent of postsynaptic actin cytoskeleton	GO:0098973	0.0375267	1.42566	4	54	1	18602	ACTB	Ex_3/4_down
GO:CC	plasma membrane	GO:0005886	7.53162e-06	5.12311	5655	127	66	18956	LINGO1,SLC26A3,NRGN,NKAIN2,YWHAH,ASIC2,PSD3,GPC5,UCHL1,PTPRK,CLDN11,GAPDH,ADGRV1,PLCL1,TF,SLC24A2,PLP1,ELMO1,CNP,SLC9A9,B2M,GRM3,APBB1IP,SLC5A11,MBP,PNISR,APOE,C10ORF90,STXBP5L,DOCK8,SLC1A3,NDRG4,CACNA2D3,UNC5D,DOCK5,FAIM2,CTNNA2,APLP1,LAMA2,DYNLL1,CRYAB,PHLPP1,MAP7,ATP1B1,PCDH15,ABCA2,KCNH8,DPP10,SLC1A2,PDE4D,HIP1,ACTB,ENOX1,ITPR2,DPP6,FHIT,NTM,GRIN1,CACNA2D1,SLC44A1,SLCO3A1,LRRTM4,DLG1,DTNA,RYR…	In_3/4_up		GO:MF	serine binding	GO:0070905	0.0375267	1.42566	4	54	1	18602	GRM7	Ex_3/4_down
GO:CC	cell leading edge	GO:0031252	0.000285018	3.54513	427	127	13	18956	CTNNA3,PSD3,PTPRK,ADGRV1,APBB1IP,DOCK8,CTNNA2,FRMD4B,SHTN1,BCAS3,SLC1A2,ACTB,STMN2	In_3/4_up		GO:MF	ganglioside binding	GO:0035594	0.0375267	1.42566	4	54	1	18602	PSAP	Ex_3/4_down
GO:CC	cell body	GO:0044297	0.000560957	3.25107	609	127	15	18956	NRGN,ASIC2,UCHL1,PTPRK,MBP,PDE1A,APOE,ENC1,ASTN2,SLC1A3,CRYAB,SHTN1,SLC1A2,STMN2,CKB	In_3/4_up		GO:MF	A-type (transient outward) potassium channel activity	GO:0005250	0.0375267	1.42566	4	54	1	18602	KCND2	Ex_3/4_down
GO:CC	neuronal cell body	GO:0043025	0.000560957	3.25107	535	127	14	18956	NRGN,ASIC2,UCHL1,PTPRK,MBP,PDE1A,APOE,ENC1,ASTN2,SLC1A3,CRYAB,SHTN1,STMN2,CKB	In_3/4_up		GO:MF	cation transmembrane transporter activity	GO:0008324	0.0375267	1.42566	646	54	6	18602	SNAP25,GRIA4,KCND2,GPM6A,GRIA2,KCNQ5	Ex_3/4_down
GO:CC	somatodendritic compartment	GO:0036477	0.000751235	3.12422	873	127	18	18956	CLU,NRGN,ASIC2,UCHL1,PTPRK,GRM3,MBP,PDE1A,APOE,ENC1,ASTN2,SLC1A3,LAMA2,CRYAB,SHTN1,STMN2,GRIN1,CKB	In_3/4_up		GO:MF	cupric ion binding	GO:1903135	0.0375267	1.42566	4	54	1	18602	PRNP	Ex_3/4_down
GO:CC	transmembrane transporter complex	GO:1902495	0.00208625	2.68063	322	127	10	18956	CACNA2D3,ATP1B1,ABCA2,DPP10,PDE4D,DPP6,GRIN1,CACNA2D1,DLG1,RYR2	In_3/4_up		GO:MF	group III metabotropic glutamate receptor activity	GO:0001642	0.0375267	1.42566	4	54	1	18602	GRM7	Ex_3/4_down
GO:CC	transporter complex	GO:1990351	0.00237544	2.62426	330	127	10	18956	CACNA2D3,ATP1B1,ABCA2,DPP10,PDE4D,DPP6,GRIN1,CACNA2D1,DLG1,RYR2	In_3/4_up		GO:MF	transmitter-gated channel activity	GO:0022835	0.0416518	1.38037	60	54	2	18602	GRIA4,GRIA2	Ex_3/4_down
GO:CC	cell-cell contact zone	GO:0044291	0.00385937	2.41348	75	127	5	18956	YWHAH,CTNNA3,ATP1B1,DLG1,PCDH9	In_3/4_up		GO:MF	transmitter-gated ion channel activity	GO:0022824	0.0416518	1.38037	60	54	2	18602	GRIA4,GRIA2	Ex_3/4_down
GO:CC	plasma membrane region	GO:0098590	0.00385937	2.41348	1213	127	20	18956	SLC26A3,NRGN,PSD3,ADGRV1,TF,GRM3,DOCK8,SLC1A3,NDRG4,FAIM2,CTNNA2,CRYAB,MAP7,ATP1B1,SLC1A2,PDE4D,HIP1,GRIN1,LRRTM4,DLG1	In_3/4_up		GO:MF	beta-galactosidase activity	GO:0004565	0.0436828	1.35969	5	54	1	18602	PSAP	Ex_3/4_down
GO:CC	synaptic cleft	GO:0043083	0.00385937	2.41348	16	127	3	18956	APOE,LAMA2,GRIN1	In_3/4_up		GO:MF	type 5 metabotropic glutamate receptor binding	GO:0031802	0.0436828	1.35969	5	54	1	18602	PRNP	Ex_3/4_down
GO:CC	cell-cell junction	GO:0005911	0.00385937	2.41348	502	127	12	18956	YWHAH,CTNNA3,PTPRK,CLDN11,GAB1,CTNNA2,FRMD4B,ATP1B1,PDZD2,ACTB,DLG1,PCDH9	In_3/4_up		GO:MF	neuroligin family protein binding	GO:0097109	0.0436828	1.35969	5	54	1	18602	NRXN3	Ex_3/4_down
GO:CC	glutamatergic synapse	GO:0098978	0.00611266	2.21377	248	127	8	18956	NRGN,CBLN2,APOE,HIP1,ACTB,GRIN1,DLG1,TNR	In_3/4_up		GO:MF	purine deoxyribonucleotide binding	GO:0032554	0.0436828	1.35969	5	54	1	18602	HSP90AB1	Ex_3/4_down
GO:CC	sarcolemma	GO:0042383	0.00666751	2.17604	137	127	6	18956	LAMA2,ATP1B1,CACNA2D1,DLG1,DTNA,RYR2	In_3/4_up		GO:MF	calmodulin-dependent protein phosphatase activity	GO:0033192	0.0436828	1.35969	5	54	1	18602	PPP3CA	Ex_3/4_down
GO:CC	postsynaptic membrane	GO:0045211	0.00666751	2.17604	255	127	8	18956	NRGN,GRM3,FAIM2,CTNNA2,HIP1,GRIN1,LRRTM4,DLG1	In_3/4_up		GO:MF	structural molecule activity	GO:0005198	0.0452988	1.34391	696	54	6	18602	MAP1B,NEFL,SEPT7,PPFIA2,ACTB,TUBA1B	Ex_3/4_down
GO:CC	myelin sheath	GO:0043209	0.00737323	2.13234	51	127	4	18956	PLP1,CNP,MBP,DLG1	In_3/4_up		GO:MF	cadherin binding	GO:0045296	0.0456722	1.34035	331	54	4	18602	RTN4,HSP90AB1,SEPT7,PKM	Ex_3/4_down
GO:CC	intercalated disc	GO:0014704	0.00760104	2.11913	52	127	4	18956	YWHAH,CTNNA3,ATP1B1,DLG1	In_3/4_up		GO:MF	endopeptidase inhibitor activity	GO:0004866	0.0456722	1.34035	180	54	3	18602	PEBP1,PRNP,APP	Ex_3/4_down
GO:CC	lamellipodium	GO:0030027	0.00767562	2.11489	202	127	7	18956	CTNNA3,APBB1IP,DOCK8,CTNNA2,SHTN1,ACTB,STMN2	In_3/4_up		GO:MF	purine ribonucleoside triphosphate binding	GO:0035639	0.0462168	1.3352	1850	54	11	18602	HSP90AA1,PEBP1,CKB,HSP90AB1,SIK3,NTRK2,DGKB,SEPT7,PKM,ACTB,TUBA1B	Ex_3/4_down
KEGG	Arrhythmogenic right ventricular cardiomyopathy	KEGG:05412	0.000287356	3.54158	77	61	7	7963	CTNNA3,CACNA2D3,CTNNA2,LAMA2,ACTB,CACNA2D1,RYR2	In_3/4_up		GO:MF	peptidase inhibitor activity	GO:0030414	0.0475796	1.32258	185	54	3	18602	PEBP1,PRNP,APP	Ex_3/4_down
REAC	Long-term potentiation	REAC:R-HSA-9620244	0.000151626	3.81923	21	75	5	10627	NEFL,NRGN,CAMK2B,GRIN1,DLG1	In_3/4_up		GO:MF	protein kinase regulator activity	GO:0019887	0.0475796	1.32258	185	54	3	18602	CALM1,CALM3,HSP90AB1	Ex_3/4_down
REAC	Assembly and cell surface presentation of NMDA receptors	REAC:R-HSA-9609736	0.00127117	2.8958	43	75	5	10627	NEFL,TUBA1B,CAMK2B,GRIN1,DLG1	In_3/4_up		GO:MF	pyrimidine nucleotide binding	GO:0019103	0.0476636	1.32181	6	54	1	18602	HSP90AB1	Ex_3/4_down
REAC	Unblocking of NMDA receptors, glutamate binding and activation	REAC:R-HSA-438066	0.00127117	2.8958	20	75	4	10627	NEFL,CAMK2B,GRIN1,DLG1	In_3/4_up		GO:MF	lipid antigen binding	GO:0030882	0.0476636	1.32181	6	54	1	18602	PSAP	Ex_3/4_down
REAC	Negative regulation of NMDA receptor-mediated neuronal transmission	REAC:R-HSA-9617324	0.00127117	2.8958	20	75	4	10627	NEFL,CAMK2B,GRIN1,DLG1	In_3/4_up		GO:MF	deoxyribonucleotide binding	GO:0032552	0.0476636	1.32181	6	54	1	18602	HSP90AB1	Ex_3/4_down
REAC	Ras activation upon Ca2+ influx through NMDA receptor	REAC:R-HSA-442982	0.00127117	2.8958	18	75	4	10627	NEFL,CAMK2B,GRIN1,DLG1	In_3/4_up		GO:MF	cuprous ion binding	GO:1903136	0.0476636	1.32181	6	54	1	18602	PRNP	Ex_3/4_down
REAC	Post NMDA receptor activation events	REAC:R-HSA-438064	0.00132241	2.87863	76	75	6	10627	NEFL,TUBA1B,NRGN,CAMK2B,GRIN1,DLG1	In_3/4_up		GO:MF	creatine kinase activity	GO:0004111	0.0476636	1.32181	6	54	1	18602	CKB	Ex_3/4_down
REAC	CREB1 phosphorylation through NMDA receptor-mediated activation of RAS signaling	REAC:R-HSA-442742	0.00231133	2.63614	26	75	4	10627	NEFL,CAMK2B,GRIN1,DLG1	In_3/4_up		GO:MF	endopeptidase regulator activity	GO:0061135	0.0479063	1.31961	189	54	3	18602	PEBP1,PRNP,APP	Ex_3/4_down
REAC	Activation of NMDA receptors and postsynaptic events	REAC:R-HSA-442755	0.00245226	2.61043	89	75	6	10627	NEFL,TUBA1B,NRGN,CAMK2B,GRIN1,DLG1	In_3/4_up		GO:MF	aspartic-type endopeptidase inhibitor activity	GO:0019828	0.049854	1.3023	7	54	1	18602	PRNP	Ex_3/4_down
REAC	Transmission across Chemical Synapses	REAC:R-HSA-112315	0.00466983	2.3307	258	75	9	10627	NEFL,TUBA1B,NRGN,SLC1A3,CACNA2D3,SLC1A2,CAMK2B,GRIN1,DLG1	In_3/4_up		GO:MF	galactosidase activity	GO:0015925	0.049854	1.3023	7	54	1	18602	PSAP	Ex_3/4_down
REAC	Neuronal System	REAC:R-HSA-112316	0.00544964	2.26363	399	75	11	10627	NEFL,TUBA1B,NRGN,SLC1A3,CACNA2D3,KCNH8,SLC1A2,CAMK2B,GRIN1,LRRTM4,DLG1	In_3/4_up		GO:MF	adenylate cyclase inhibiting G protein-coupled glutamate receptor activity	GO:0001640	0.049854	1.3023	7	54	1	18602	GRM7	Ex_3/4_down
WP	Arrhythmogenic Right Ventricular Cardiomyopathy	WP:WP2118	0.000520863	3.28328	76	64	7	7474	CTNNA3,CACNA2D3,CTNNA2,LAMA2,ACTB,CACNA2D1,RYR2	In_3/4_up		GO:MF	extracellular ligand-gated ion channel activity	GO:0005230	0.049854	1.3023	75	54	2	18602	GRIA4,GRIA2	Ex_3/4_down
WP	Glial Cell Differentiation	WP:WP2276	0.00255361	2.59285	8	64	3	7474	PLP1,CNP,MBP	In_3/4_up		GO:MF	GPI anchor binding	GO:0034235	0.049854	1.3023	7	54	1	18602	THY1	Ex_3/4_down
WP	Disruption of postsynaptic signalling by CNV	WP:WP4875	0.00978722	2.00934	34	64	4	7474	CAMK2B,GRIN1,DLG1,RYR2	In_3/4_up		GO:MF	kinetochore binding	GO:0043515	0.049854	1.3023	7	54	1	18602	CLASP2	Ex_3/4_down
HPA	hippocampus; glial cells[‚â•Medium]	HPA:0250122	6.39722e-05	4.19401	1944	82	35	10719	LINGO1,TUBA1B,NRGN,GPC5,CLDN11,GAPDH,POLR2F,CNP,KLHL32,QDPR,APBB1IP,MBP,PNISR,GAB1,PDE1A,APOE,SLC1A3,PTGDS,PTMA,IQCJ-SCHIP1,APLP1,CRYAB,MAP7,SHTN1,FKBP5,KCNH8,SLC1A2,DIP2B,PDE4D,HIP1,FHIT,CKB,LDLRAD4,DTNA,LUC7L3	In_3/4_up		GO:MF	voltage-gated ion channel activity	GO:0005244	0.049854	1.3023	199	54	3	18602	SNAP25,KCND2,KCNQ5	Ex_3/4_down
HPA	cerebral cortex; neuropil[‚â•Medium]	HPA:0100212	0.000177284	3.75133	2596	82	40	10719	CLU,NEFL,TUBA1B,NRGN,ASIC2,PSD3,GPC5,UCHL1,CLDN11,SAT1,PLCL1,PLP1,KIAA1217,CNP,PLXDC2,MBP,GAB1,SLC1A3,PTMA,AGBL4,FAIM2,IQCJ-SCHIP1,CTNNA2,APLP1,CRYAB,MAP7,ATP1B1,SLC1A2,MOBP,DIP2B,PDE4D,HIP1,CAMK2B,DPP6,FHIT,NTM,CKB,DLG1,TNR,DTNA	In_3/4_up		GO:MF	thyroid hormone binding	GO:0070324	0.049854	1.3023	7	54	1	18602	PKM	Ex_3/4_down
HPA	cerebral cortex; neuropil[High]	HPA:0100213	0.000202631	3.6933	403	82	14	10719	NEFL,TUBA1B,ASIC2,GPC5,PLP1,CNP,SLC1A3,PTMA,FAIM2,IQCJ-SCHIP1,SLC1A2,HIP1,DPP6,CKB	In_3/4_up		GO:MF	G protein-coupled glutamate receptor activity	GO:0098988	0.049854	1.3023	7	54	1	18602	GRM7	Ex_3/4_down
HPA	cerebral cortex; glial cells[‚â•Medium]	HPA:0100122	0.0058019	2.23643	2603	82	36	10719	LINGO1,TUBA1B,NRGN,ASIC2,GPC5,RALYL,CLDN11,GAPDH,PLCL1,PLP1,POLR2F,CNP,KLHL32,QDPR,PLXDC2,PNISR,GAB1,MAML2,PDE1A,APOE,SLC1A3,IQCJ-SCHIP1,SMYD3,CRYAB,MAP7,SHTN1,BCAS3,ABCA2,FKBP5,KCNH8,PDE4D,HIP1,FHIT,CKB,LDLRAD4,LUC7L3	In_3/4_up		GO:MF	calcium-dependent protein serine/threonine phosphatase activity	GO:0004723	0.049854	1.3023	7	54	1	18602	PPP3CA	Ex_3/4_down
HPA	hippocampus	HPA:0250000	0.00736409	2.13288	6687	82	67	10719	CLU,LINGO1,NEFL,TUBA1B,NRGN,CTNNA3,ASIC2,PSD3,GPC5,UCHL1,RALYL,CLDN11,SAT1,GAPDH,PLCL1,PLP1,POLR2F,KIAA1217,CNP,KLHL32,QDPR,SLC9A9,B2M,PLXDC2,APBB1IP,MBP,PNISR,CNDP1,GAB1,MAML2,PDE1A,APOE,DOCK8,SLC1A3,PTGDS,PTMA,DOCK5,AGBL4,FAIM2,IQCJ-SCHIP1,SMYD3,CTNNA2,APLP1,CRYAB,MAP7,SHTN1,BCAS3,ABCA2,FKBP5,KCNH8,SLC1A2,DIP2B,PDE4D,HIP1,CAMK2B,IDS,FHIT,NTM,GRIN1,CACNA2D1,MAN2A1,CKB,LDLRAD4,DLG1,DTNA,LUC7L3,RY…	In_3/4_up		GO:MF	G protein-coupled acetylcholine receptor activity	GO:0016907	0.049854	1.3023	7	54	1	18602	CHRM3	Ex_3/4_down
KEGG	Apelin signaling pathway	KEGG:04371	0.000118309	3.92698	136	13	5	7963	MEF2C,SPP1,SLC8A1,ITPR2,MEF2A	Mic_3/4_up		GO:MF	purine ribonucleotide binding	GO:0032555	0.049854	1.3023	1916	54	11	18602	HSP90AA1,PEBP1,CKB,HSP90AB1,SIK3,NTRK2,DGKB,SEPT7,PKM,ACTB,TUBA1B	Ex_3/4_down
KEGG	cGMP-PKG signaling pathway	KEGG:04022	0.0041737	2.37948	165	13	4	7963	MEF2C,SLC8A1,ITPR2,MEF2A	Mic_3/4_up		GO:MF	phosphotransferase activity, nitrogenous group as acceptor	GO:0016775	0.049854	1.3023	7	54	1	18602	CKB	Ex_3/4_down
GO:BP	nervous system development	GO:0007399	0.00295358	2.52965	2483	13	9	18017	NTM,KIRREL3,HSP90AA1,TTLL7,LINGO1,GPM6B,ANK3,MBP,NCAM1	Oli_3/4_up		GO:MF	voltage-gated channel activity	GO:0022832	0.0499323	1.30162	200	54	3	18602	SNAP25,KCND2,KCNQ5	Ex_3/4_down
GO:BP	neuron development	GO:0048666	0.00295358	2.52965	1167	13	7	18017	NTM,KIRREL3,HSP90AA1,LINGO1,GPM6B,ANK3,NCAM1	Oli_3/4_up		GO:BP	cell projection organization	GO:0030030	1.4581e-09	8.83621	1608	53	24	18017	CCK,RTN4,HSP90AA1,STMN1,CHN1,ENC1,MAP1B,SNAP25,DYNLL1,YWHAH,HSP90AB1,PPP3CA,NEFL,NTRK2,THY1,SEPT7,PPFIA2,GPM6A,ACTB,NRXN3,PRNP,TENM2,NEGR1,APP	Ex_3/4_down
GO:BP	neuron differentiation	GO:0030182	0.00595009	2.22548	1437	13	7	18017	NTM,KIRREL3,HSP90AA1,LINGO1,GPM6B,ANK3,NCAM1	Oli_3/4_up		GO:BP	neuron projection development	GO:0031175	1.4581e-09	8.83621	1030	53	20	18017	CCK,RTN4,HSP90AA1,STMN1,CHN1,ENC1,MAP1B,SNAP25,YWHAH,HSP90AB1,PPP3CA,NEFL,NTRK2,THY1,PPFIA2,GPM6A,ACTB,NRXN3,NEGR1,APP	Ex_3/4_down
GO:BP	neuron projection development	GO:0031175	0.00613038	2.21251	1030	13	6	18017	KIRREL3,HSP90AA1,LINGO1,GPM6B,ANK3,NCAM1	Oli_3/4_up		GO:BP	synaptic signaling	GO:0099536	1.4581e-09	8.83621	724	53	18	18017	NRGN,CALM1,CALM3,MAP1B,PLCB1,SNAP25,YWHAH,PPP3CA,GRM7,NTRK2,KCND2,DGKB,PPFIA2,CHRM3,NRXN3,PRNP,GRIA2,APP	Ex_3/4_down
GO:BP	cell development	GO:0048468	0.00613038	2.21251	2237	13	8	18017	NTM,KIRREL3,HSP90AA1,PIP4K2A,LINGO1,GPM6B,ANK3,NCAM1	Oli_3/4_up		GO:BP	neuron development	GO:0048666	1.4581e-09	8.83621	1167	53	21	18017	CCK,RTN4,HSP90AA1,STMN1,CHN1,ENC1,MAP1B,SNAP25,YWHAH,HSP90AB1,PPP3CA,NEFL,NTRK2,THY1,PPFIA2,GPM6A,ACTB,NRXN3,TENM2,NEGR1,APP	Ex_3/4_down
GO:BP	generation of neurons	GO:0048699	0.00613038	2.21251	1605	13	7	18017	NTM,KIRREL3,HSP90AA1,LINGO1,GPM6B,ANK3,NCAM1	Oli_3/4_up		GO:BP	plasma membrane bounded cell projection organization	GO:0120036	1.4581e-09	8.83621	1567	53	24	18017	CCK,RTN4,HSP90AA1,STMN1,CHN1,ENC1,MAP1B,SNAP25,DYNLL1,YWHAH,HSP90AB1,PPP3CA,NEFL,NTRK2,THY1,SEPT7,PPFIA2,GPM6A,ACTB,NRXN3,PRNP,TENM2,NEGR1,APP	Ex_3/4_down
GO:BP	neuron projection morphogenesis	GO:0048812	0.0066574	2.1767	678	13	5	18017	KIRREL3,HSP90AA1,LINGO1,ANK3,NCAM1	Oli_3/4_up		GO:BP	anterograde trans-synaptic signaling	GO:0098916	1.4581e-09	8.83621	694	53	17	18017	NRGN,CALM1,CALM3,MAP1B,SNAP25,YWHAH,PPP3CA,GRM7,NTRK2,KCND2,DGKB,PPFIA2,CHRM3,NRXN3,PRNP,GRIA2,APP	Ex_3/4_down
GO:BP	plasma membrane bounded cell projection morphogenesis	GO:0120039	0.0066574	2.1767	692	13	5	18017	KIRREL3,HSP90AA1,LINGO1,ANK3,NCAM1	Oli_3/4_up		GO:BP	plasma membrane bounded cell projection morphogenesis	GO:0120039	1.4581e-09	8.83621	692	53	17	18017	CCK,RTN4,HSP90AA1,STMN1,CHN1,MAP1B,YWHAH,HSP90AB1,PPP3CA,NEFL,NTRK2,THY1,PPFIA2,GPM6A,ACTB,NRXN3,APP	Ex_3/4_down
GO:BP	neurogenesis	GO:0022008	0.0066574	2.1767	1710	13	7	18017	NTM,KIRREL3,HSP90AA1,LINGO1,GPM6B,ANK3,NCAM1	Oli_3/4_up		GO:BP	cell projection morphogenesis	GO:0048858	1.4581e-09	8.83621	696	53	17	18017	CCK,RTN4,HSP90AA1,STMN1,CHN1,MAP1B,YWHAH,HSP90AB1,PPP3CA,NEFL,NTRK2,THY1,PPFIA2,GPM6A,ACTB,NRXN3,APP	Ex_3/4_down
GO:BP	cell projection morphogenesis	GO:0048858	0.0066574	2.1767	696	13	5	18017	KIRREL3,HSP90AA1,LINGO1,ANK3,NCAM1	Oli_3/4_up		GO:BP	chemical synaptic transmission	GO:0007268	1.4581e-09	8.83621	694	53	17	18017	NRGN,CALM1,CALM3,MAP1B,SNAP25,YWHAH,PPP3CA,GRM7,NTRK2,KCND2,DGKB,PPFIA2,CHRM3,NRXN3,PRNP,GRIA2,APP	Ex_3/4_down
GO:BP	cell part morphogenesis	GO:0032990	0.00692319	2.15969	716	13	5	18017	KIRREL3,HSP90AA1,LINGO1,ANK3,NCAM1	Oli_3/4_up		GO:BP	nervous system development	GO:0007399	1.4581e-09	8.83621	2483	53	29	18017	CCK,NRGN,RTN4,HSP90AA1,STMN1,CHN1,ENC1,CALM1,CALM3,CKB,MAP1B,PLCB1,SNAP25,DYNLL1,YWHAH,HSP90AB1,PPP3CA,NEFL,NTRK2,THY1,PPFIA2,GPM6A,CHRM3,ACTB,NRXN3,TENM2,NEGR1,PSAP,APP	Ex_3/4_down
												GO:BP	cellular component morphogenesis	GO:0032989	1.4581e-09	8.83621	812	53	18	18017	CCK,RTN4,HSP90AA1,STMN1,CHN1,MAP1B,YWHAH,HSP90AB1,PPP3CA,NEFL,NTRK2,THY1,PPFIA2,GPM6A,ACTB,NRXN3,CLASP2,APP	Ex_3/4_down
												GO:BP	neuron projection morphogenesis	GO:0048812	1.4581e-09	8.83621	678	53	17	18017	CCK,RTN4,HSP90AA1,STMN1,CHN1,MAP1B,YWHAH,HSP90AB1,PPP3CA,NEFL,NTRK2,THY1,PPFIA2,GPM6A,ACTB,NRXN3,APP	Ex_3/4_down
												GO:BP	trans-synaptic signaling	GO:0099537	1.48969e-09	8.8269	702	53	17	18017	NRGN,CALM1,CALM3,MAP1B,SNAP25,YWHAH,PPP3CA,GRM7,NTRK2,KCND2,DGKB,PPFIA2,CHRM3,NRXN3,PRNP,GRIA2,APP	Ex_3/4_down
												GO:BP	cell morphogenesis involved in neuron differentiation	GO:0048667	1.85623e-09	8.73137	615	53	16	18017	CCK,RTN4,HSP90AA1,STMN1,CHN1,MAP1B,YWHAH,HSP90AB1,PPP3CA,NEFL,NTRK2,THY1,PPFIA2,ACTB,NRXN3,APP	Ex_3/4_down
												GO:BP	regulation of trans-synaptic signaling	GO:0099177	1.85623e-09	8.73137	421	53	14	18017	NRGN,CALM1,CALM3,MAP1B,SNAP25,YWHAH,PPP3CA,GRM7,NTRK2,DGKB,PPFIA2,NRXN3,PRNP,APP	Ex_3/4_down
												GO:BP	cell part morphogenesis	GO:0032990	1.85623e-09	8.73137	716	53	17	18017	CCK,RTN4,HSP90AA1,STMN1,CHN1,MAP1B,YWHAH,HSP90AB1,PPP3CA,NEFL,NTRK2,THY1,PPFIA2,GPM6A,ACTB,NRXN3,APP	Ex_3/4_down
												GO:BP	modulation of chemical synaptic transmission	GO:0050804	1.85623e-09	8.73137	420	53	14	18017	NRGN,CALM1,CALM3,MAP1B,SNAP25,YWHAH,PPP3CA,GRM7,NTRK2,DGKB,PPFIA2,NRXN3,PRNP,APP	Ex_3/4_down
												GO:BP	neuron differentiation	GO:0030182	3.33507e-09	8.4769	1437	53	22	18017	CCK,RTN4,HSP90AA1,STMN1,CHN1,ENC1,MAP1B,SNAP25,YWHAH,HSP90AB1,PPP3CA,NEFL,NTRK2,THY1,PPFIA2,GPM6A,ACTB,NRXN3,TENM2,NEGR1,PSAP,APP	Ex_3/4_down
												GO:BP	cell morphogenesis involved in differentiation	GO:0000904	3.86747e-09	8.41257	764	53	17	18017	CCK,RTN4,HSP90AA1,STMN1,CHN1,MAP1B,YWHAH,HSP90AB1,PPP3CA,NEFL,NTRK2,THY1,PPFIA2,ACTB,NRXN3,ATRNL1,APP	Ex_3/4_down
												GO:BP	cell morphogenesis	GO:0000902	7.47634e-09	8.12631	1058	53	19	18017	CCK,RTN4,HSP90AA1,STMN1,CHN1,MAP1B,YWHAH,HSP90AB1,PPP3CA,NEFL,NTRK2,THY1,SEPT7,PPFIA2,GPM6A,ACTB,NRXN3,ATRNL1,APP	Ex_3/4_down
												GO:BP	regulation of transport	GO:0051049	1.13995e-08	7.94311	1887	53	24	18017	CCK,TMSB4X,CALM1,CALM3,MAP1B,SNAP25,VSNL1,YWHAH,GRIA4,HSP90AB1,PPP3CA,NEFL,GRM7,KCND2,THY1,PPFIA2,CHRM3,ACTB,NRXN3,PRNP,CLASP2,GRIA2,KCNQ5,APP	Ex_3/4_down
												GO:BP	regulation of plasma membrane bounded cell projection organization	GO:0120035	1.13995e-08	7.94311	707	53	16	18017	RTN4,CHN1,ENC1,MAP1B,SNAP25,YWHAH,PPP3CA,NEFL,NTRK2,THY1,SEPT7,PPFIA2,GPM6A,PRNP,TENM2,NEGR1	Ex_3/4_down
												GO:BP	regulation of cell projection organization	GO:0031344	1.34134e-08	7.87246	717	53	16	18017	RTN4,CHN1,ENC1,MAP1B,SNAP25,YWHAH,PPP3CA,NEFL,NTRK2,THY1,SEPT7,PPFIA2,GPM6A,PRNP,TENM2,NEGR1	Ex_3/4_down
												GO:BP	regulation of localization	GO:0032879	1.4118e-08	7.85023	2913	53	29	18017	CCK,RTN4,HSP90AA1,STMN1,TMSB4X,TMSB10,CALM1,CALM3,MAP1B,PLCB1,SNAP25,VSNL1,YWHAH,GRIA4,HSP90AB1,PPP3CA,NEFL,GRM7,KCND2,THY1,PPFIA2,CHRM3,ACTB,NRXN3,PRNP,CLASP2,GRIA2,KCNQ5,APP	Ex_3/4_down
												GO:BP	generation of neurons	GO:0048699	2.06178e-08	7.68576	1605	53	22	18017	CCK,RTN4,HSP90AA1,STMN1,CHN1,ENC1,MAP1B,SNAP25,YWHAH,HSP90AB1,PPP3CA,NEFL,NTRK2,THY1,PPFIA2,GPM6A,ACTB,NRXN3,TENM2,NEGR1,PSAP,APP	Ex_3/4_down
												GO:BP	regulation of transmembrane transporter activity	GO:0022898	4.07608e-08	7.38976	279	53	11	18017	TMSB4X,CALM1,CALM3,YWHAH,GRIA4,NEFL,CHRM3,ACTB,PRNP,GRIA2,APP	Ex_3/4_down
												GO:BP	regulation of cellular component organization	GO:0051128	5.51567e-08	7.2584	2450	53	26	18017	CCK,RTN4,HSP90AA1,STMN1,TMSB4X,CHN1,TMSB10,ENC1,CALM1,CALM3,MAP1B,PLCB1,SNAP25,YWHAH,PPP3CA,NEFL,NTRK2,THY1,SEPT7,PPFIA2,GPM6A,PRNP,TENM2,CLASP2,NEGR1,APP	Ex_3/4_down
												GO:BP	neurogenesis	GO:0022008	6.20208e-08	7.20746	1710	53	22	18017	CCK,RTN4,HSP90AA1,STMN1,CHN1,ENC1,MAP1B,SNAP25,YWHAH,HSP90AB1,PPP3CA,NEFL,NTRK2,THY1,PPFIA2,GPM6A,ACTB,NRXN3,TENM2,NEGR1,PSAP,APP	Ex_3/4_down
												GO:BP	regulation of transporter activity	GO:0032409	6.35901e-08	7.19661	294	53	11	18017	TMSB4X,CALM1,CALM3,YWHAH,GRIA4,NEFL,CHRM3,ACTB,PRNP,GRIA2,APP	Ex_3/4_down
												GO:BP	ion transport	GO:0006811	7.22306e-08	7.14128	1730	53	22	18017	CCK,TMSB4X,CALM1,CALM3,FTH1,SNAP25,YWHAH,GRIA4,PPP3CA,NEFL,GRM7,NTRK2,KCND2,THY1,PPFIA2,GPM6A,CHRM3,PRNP,GRIA2,KCNQ5,PSAP,APP	Ex_3/4_down
												GO:BP	regulation of transmembrane transport	GO:0034762	8.02096e-08	7.09577	589	53	14	18017	TMSB4X,CALM1,CALM3,YWHAH,GRIA4,NEFL,KCND2,THY1,CHRM3,ACTB,PRNP,GRIA2,KCNQ5,APP	Ex_3/4_down
												GO:BP	axonogenesis	GO:0007409	8.64598e-08	7.06319	488	53	13	18017	CCK,RTN4,HSP90AA1,STMN1,CHN1,MAP1B,HSP90AB1,NEFL,NTRK2,THY1,ACTB,NRXN3,APP	Ex_3/4_down
												GO:BP	regulation of ion transmembrane transport	GO:0034765	1.07213e-07	6.96975	498	53	13	18017	TMSB4X,CALM1,CALM3,YWHAH,GRIA4,NEFL,KCND2,THY1,CHRM3,PRNP,GRIA2,KCNQ5,APP	Ex_3/4_down
												GO:BP	regulation of ion transport	GO:0043269	1.12414e-07	6.94918	726	53	15	18017	CCK,TMSB4X,CALM1,CALM3,YWHAH,GRIA4,NEFL,GRM7,KCND2,THY1,CHRM3,PRNP,GRIA2,KCNQ5,APP	Ex_3/4_down
												GO:BP	secretion	GO:0046903	1.32651e-07	6.87729	1625	53	21	18017	CCK,HSP90AA1,TMSB4X,CALM1,CALM3,FTH1,SNAP25,DYNLL1,VSNL1,HSP90AB1,PPP3CA,GRM7,NTRK2,PKM,PPFIA2,PCDH7,CHRM3,NRXN3,CLASP2,PSAP,APP	Ex_3/4_down
												GO:BP	secretion by cell	GO:0032940	1.78044e-07	6.74947	1484	53	20	18017	CCK,HSP90AA1,TMSB4X,CALM1,CALM3,FTH1,SNAP25,DYNLL1,VSNL1,HSP90AB1,PPP3CA,GRM7,NTRK2,PKM,PPFIA2,PCDH7,NRXN3,CLASP2,PSAP,APP	Ex_3/4_down
												GO:BP	substantia nigra development	GO:0021762	2.07879e-07	6.68219	44	53	6	18017	CALM1,CALM3,CKB,DYNLL1,YWHAH,ACTB	Ex_3/4_down
												GO:BP	axon development	GO:0061564	2.11325e-07	6.67505	533	53	13	18017	CCK,RTN4,HSP90AA1,STMN1,CHN1,MAP1B,HSP90AB1,NEFL,NTRK2,THY1,ACTB,NRXN3,APP	Ex_3/4_down
												GO:BP	exocytosis	GO:0006887	2.2232e-07	6.65302	902	53	16	18017	HSP90AA1,TMSB4X,CALM1,CALM3,FTH1,SNAP25,DYNLL1,VSNL1,HSP90AB1,PKM,PPFIA2,PCDH7,NRXN3,CLASP2,PSAP,APP	Ex_3/4_down
												GO:BP	brain development	GO:0007420	2.71693e-07	6.56592	784	53	15	18017	NRGN,RTN4,STMN1,CALM1,CALM3,CKB,PLCB1,DYNLL1,YWHAH,PPP3CA,NEFL,NTRK2,ACTB,PSAP,APP	Ex_3/4_down
												GO:BP	export from cell	GO:0140352	2.84141e-07	6.54647	1537	53	20	18017	CCK,HSP90AA1,TMSB4X,CALM1,CALM3,FTH1,SNAP25,DYNLL1,VSNL1,HSP90AB1,PPP3CA,GRM7,NTRK2,PKM,PPFIA2,PCDH7,NRXN3,CLASP2,PSAP,APP	Ex_3/4_down
												GO:BP	central nervous system development	GO:0007417	2.84141e-07	6.54647	1065	53	17	18017	NRGN,RTN4,HSP90AA1,STMN1,CALM1,CALM3,CKB,PLCB1,DYNLL1,YWHAH,HSP90AB1,PPP3CA,NEFL,NTRK2,ACTB,PSAP,APP	Ex_3/4_down
												GO:BP	regulation of ion transmembrane transporter activity	GO:0032412	2.84141e-07	6.54647	268	53	10	18017	TMSB4X,CALM1,CALM3,YWHAH,GRIA4,NEFL,CHRM3,PRNP,GRIA2,APP	Ex_3/4_down
												GO:BP	head development	GO:0060322	5.24043e-07	6.28063	829	53	15	18017	NRGN,RTN4,STMN1,CALM1,CALM3,CKB,PLCB1,DYNLL1,YWHAH,PPP3CA,NEFL,NTRK2,ACTB,PSAP,APP	Ex_3/4_down
												GO:BP	cell development	GO:0048468	1.0475e-06	5.97985	2237	53	23	18017	CCK,RTN4,HSP90AA1,STMN1,CHN1,ENC1,MAP1B,SNAP25,YWHAH,HSP90AB1,PPP3CA,NEFL,NTRK2,THY1,PPFIA2,GPM6A,ACTB,NRXN3,TENM2,ATRNL1,NEGR1,PSAP,APP	Ex_3/4_down
												GO:BP	glutamate receptor signaling pathway	GO:0007215	1.07559e-06	5.96836	103	53	7	18017	PLCB1,GRIA4,NEFL,GRM7,PRNP,GRIA2,APP	Ex_3/4_down
												GO:BP	neural nucleus development	GO:0048857	1.62737e-06	5.78851	64	53	6	18017	CALM1,CALM3,CKB,DYNLL1,YWHAH,ACTB	Ex_3/4_down
												GO:BP	regulation of neuron projection development	GO:0010975	1.62737e-06	5.78851	528	53	12	18017	RTN4,CHN1,ENC1,MAP1B,SNAP25,YWHAH,PPP3CA,NEFL,NTRK2,THY1,PPFIA2,NEGR1	Ex_3/4_down
												GO:BP	regulation of cell communication	GO:0010646	1.66243e-06	5.77926	3659	53	29	18017	NRGN,RTN4,HSP90AA1,STMN1,TMSB4X,CHN1,PEBP1,CALM1,CALM3,MAP1B,PLCB1,SNAP25,VSNL1,YWHAH,GRIA4,HSP90AB1,SIK3,PPP3CA,NEFL,GRM7,NTRK2,THY1,DGKB,PPFIA2,NRXN3,PRNP,GRIA2,PSAP,APP	Ex_3/4_down
												GO:BP	regulated exocytosis	GO:0045055	1.74293e-06	5.75872	779	53	14	18017	HSP90AA1,TMSB4X,CALM1,CALM3,FTH1,SNAP25,DYNLL1,HSP90AB1,PKM,PPFIA2,PCDH7,NRXN3,PSAP,APP	Ex_3/4_down
												GO:BP	regulation of signaling	GO:0023051	2.0568e-06	5.68681	3699	53	29	18017	NRGN,RTN4,HSP90AA1,STMN1,TMSB4X,CHN1,PEBP1,CALM1,CALM3,MAP1B,PLCB1,SNAP25,VSNL1,YWHAH,GRIA4,HSP90AB1,SIK3,PPP3CA,NEFL,GRM7,NTRK2,THY1,DGKB,PPFIA2,NRXN3,PRNP,GRIA2,PSAP,APP	Ex_3/4_down
												GO:BP	localization	GO:0051179	2.05753e-06	5.68665	6920	53	40	18017	CCK,RTN4,HSP90AA1,STMN1,TMSB4X,TMSB10,CALM1,CALM3,MAP1B,PLCB1,FTH1,SNAP25,DYNLL1,VSNL1,YWHAH,GRIA4,HSP90AB1,PPP3CA,NEFL,GRM7,NTRK2,KCND2,RTN3,THY1,SEPT7,PKM,PPFIA2,PCDH7,GPM6A,CHRM3,ACTB,NRXN3,PRNP,ATRNL1,CLASP2,TUBA1B,GRIA2,KCNQ5,PSAP,APP	Ex_3/4_down
												GO:BP	cell-cell signaling	GO:0007267	3.34923e-06	5.47505	1806	53	20	18017	NRGN,CALM1,CALM3,MAP1B,PLCB1,SNAP25,VSNL1,YWHAH,PPP3CA,GRM7,NTRK2,KCND2,THY1,DGKB,PPFIA2,CHRM3,NRXN3,PRNP,GRIA2,APP	Ex_3/4_down
												GO:BP	regulation of neuron differentiation	GO:0045664	3.34923e-06	5.47505	693	53	13	18017	RTN4,CHN1,ENC1,MAP1B,SNAP25,YWHAH,PPP3CA,NEFL,NTRK2,THY1,PPFIA2,NEGR1,APP	Ex_3/4_down
												GO:BP	regulation of cation transmembrane transport	GO:1904062	3.35529e-06	5.47427	357	53	10	18017	TMSB4X,CALM1,CALM3,YWHAH,GRIA4,NEFL,THY1,PRNP,GRIA2,APP	Ex_3/4_down
												GO:BP	regulation of biological quality	GO:0065008	5.44167e-06	5.26427	4133	53	30	18017	CCK,NRGN,RTN4,HSP90AA1,STMN1,TMSB4X,TMSB10,CALM1,CALM3,CKB,MAP1B,FTH1,SNAP25,VSNL1,YWHAH,HSP90AB1,PPP3CA,NEFL,NTRK2,KCND2,THY1,DGKB,SEPT7,PPFIA2,GPM6A,CHRM3,ACTB,NRXN3,PRNP,APP	Ex_3/4_down
												GO:BP	transport	GO:0006810	7.04647e-06	5.15203	5299	53	34	18017	CCK,HSP90AA1,TMSB4X,CALM1,CALM3,MAP1B,FTH1,SNAP25,DYNLL1,VSNL1,YWHAH,GRIA4,HSP90AB1,PPP3CA,NEFL,GRM7,NTRK2,KCND2,RTN3,THY1,PKM,PPFIA2,PCDH7,GPM6A,CHRM3,ACTB,NRXN3,PRNP,CLASP2,TUBA1B,GRIA2,KCNQ5,PSAP,APP	Ex_3/4_down
												GO:BP	behavior	GO:0007610	7.04647e-06	5.15203	615	53	12	18017	CCK,NRGN,PLCB1,SNAP25,NTRK2,KCND2,NRXN3,PRNP,NEGR1,PSAP,OXR1,APP	Ex_3/4_down
												GO:BP	cation transport	GO:0006812	7.72162e-06	5.11229	1197	53	16	18017	TMSB4X,CALM1,CALM3,FTH1,SNAP25,YWHAH,GRIA4,PPP3CA,NEFL,KCND2,THY1,GPM6A,PRNP,GRIA2,KCNQ5,APP	Ex_3/4_down
												GO:BP	cation transmembrane transport	GO:0098655	7.96576e-06	5.09877	894	53	14	18017	TMSB4X,CALM1,CALM3,SNAP25,YWHAH,GRIA4,NEFL,KCND2,THY1,GPM6A,PRNP,GRIA2,KCNQ5,APP	Ex_3/4_down
												GO:BP	cellular localization	GO:0051641	9.83344e-06	5.00729	3487	53	27	18017	RTN4,HSP90AA1,TMSB4X,TMSB10,CALM1,CALM3,MAP1B,FTH1,SNAP25,DYNLL1,VSNL1,YWHAH,HSP90AB1,PPP3CA,NEFL,THY1,SEPT7,PKM,PPFIA2,PCDH7,ACTB,NRXN3,PRNP,CLASP2,TUBA1B,PSAP,APP	Ex_3/4_down
												GO:BP	positive regulation of cellular component organization	GO:0051130	1.00195e-05	4.99915	1226	53	16	18017	CCK,HSP90AA1,ENC1,MAP1B,PLCB1,YWHAH,PPP3CA,NEFL,NTRK2,THY1,SEPT7,GPM6A,TENM2,CLASP2,NEGR1,APP	Ex_3/4_down
												GO:BP	glutamate secretion	GO:0014047	1.00195e-05	4.99915	47	53	5	18017	CCK,SNAP25,GRM7,NTRK2,PPFIA2	Ex_3/4_down
												GO:BP	regulation of cell morphogenesis involved in differentiation	GO:0010769	1.11543e-05	4.95256	313	53	9	18017	RTN4,CHN1,MAP1B,YWHAH,PPP3CA,NEFL,NTRK2,THY1,PPFIA2	Ex_3/4_down
												GO:BP	midbrain development	GO:0030901	1.14496e-05	4.94121	93	53	6	18017	CALM1,CALM3,CKB,DYNLL1,YWHAH,ACTB	Ex_3/4_down
												GO:BP	establishment of localization	GO:0051234	1.1607e-05	4.93528	5427	53	34	18017	CCK,HSP90AA1,TMSB4X,CALM1,CALM3,MAP1B,FTH1,SNAP25,DYNLL1,VSNL1,YWHAH,GRIA4,HSP90AB1,PPP3CA,NEFL,GRM7,NTRK2,KCND2,RTN3,THY1,PKM,PPFIA2,PCDH7,GPM6A,CHRM3,ACTB,NRXN3,PRNP,CLASP2,TUBA1B,GRIA2,KCNQ5,PSAP,APP	Ex_3/4_down
												GO:BP	synapse organization	GO:0050808	1.16252e-05	4.9346	417	53	10	18017	MAP1B,NEFL,NTRK2,PPFIA2,GPM6A,ACTB,LRRTM4,NRXN3,PRNP,APP	Ex_3/4_down
												GO:BP	cell junction organization	GO:0034330	2.5081e-05	4.60066	703	53	12	18017	MAP1B,NEFL,NTRK2,THY1,PPFIA2,GPM6A,ACTB,LRRTM4,NRXN3,PRNP,CLASP2,APP	Ex_3/4_down
												GO:BP	cellular component assembly	GO:0022607	3.2891e-05	4.48292	2989	53	24	18017	CCK,RTN4,HSP90AA1,STMN1,TMSB4X,TMSB10,MAP1B,SNAP25,DYNLL1,HSP90AB1,NEFL,NTRK2,KCND2,RTN3,THY1,SEPT7,GPM6A,ACTB,NRXN3,PRNP,TENM2,CLASP2,PSAP,APP	Ex_3/4_down
												GO:BP	ion transmembrane transport	GO:0034220	3.2891e-05	4.48292	1179	53	15	18017	TMSB4X,CALM1,CALM3,SNAP25,YWHAH,GRIA4,NEFL,KCND2,THY1,GPM6A,CHRM3,PRNP,GRIA2,KCNQ5,APP	Ex_3/4_down
												GO:BP	regulation of neurogenesis	GO:0050767	3.2891e-05	4.48292	867	53	13	18017	RTN4,CHN1,ENC1,MAP1B,SNAP25,YWHAH,PPP3CA,NEFL,NTRK2,THY1,PPFIA2,NEGR1,APP	Ex_3/4_down
												GO:BP	system development	GO:0048731	3.60943e-05	4.44256	5096	53	32	18017	CCK,NRGN,RTN4,HSP90AA1,STMN1,CHN1,ENC1,CALM1,CALM3,CKB,MAP1B,PLCB1,SNAP25,DYNLL1,YWHAH,HSP90AB1,PPP3CA,NEFL,NTRK2,THY1,PKM,PPFIA2,GPM6A,CHRM3,ACTB,NRXN3,TENM2,ATRNL1,CLASP2,NEGR1,PSAP,APP	Ex_3/4_down
												GO:BP	establishment of localization in cell	GO:0051649	3.6098e-05	4.44252	2779	53	23	18017	HSP90AA1,TMSB4X,CALM1,CALM3,MAP1B,FTH1,SNAP25,DYNLL1,VSNL1,YWHAH,HSP90AB1,PPP3CA,NEFL,THY1,PKM,PPFIA2,PCDH7,NRXN3,PRNP,CLASP2,TUBA1B,PSAP,APP	Ex_3/4_down
												GO:BP	learning or memory	GO:0007611	3.75852e-05	4.42498	270	53	8	18017	CCK,NRGN,PLCB1,SNAP25,NTRK2,NRXN3,PRNP,APP	Ex_3/4_down
												GO:BP	regulation of cation channel activity	GO:2001257	3.90601e-05	4.40827	187	53	7	18017	TMSB4X,CALM1,CALM3,GRIA4,NEFL,GRIA2,APP	Ex_3/4_down
												GO:BP	regulation of glutamate receptor signaling pathway	GO:1900449	4.23447e-05	4.3732	65	53	5	18017	GRIA4,NEFL,PRNP,GRIA2,APP	Ex_3/4_down
												GO:BP	regulation of synaptic plasticity	GO:0048167	5.20874e-05	4.28327	196	53	7	18017	NRGN,MAP1B,SNAP25,YWHAH,NTRK2,PRNP,APP	Ex_3/4_down
												GO:BP	regulation of molecular function	GO:0065009	5.30748e-05	4.27511	3084	53	24	18017	CCK,HSP90AA1,STMN1,TMSB4X,CHN1,PEBP1,CALM1,CALM3,PLCB1,DYNLL1,YWHAH,GRIA4,HSP90AB1,PPP3CA,NEFL,GRM7,NTRK2,THY1,CHRM3,ACTB,PRNP,GRIA2,PSAP,APP	Ex_3/4_down
												GO:BP	regulation of cell morphogenesis	GO:0022604	5.71693e-05	4.24284	506	53	10	18017	RTN4,CHN1,MAP1B,YWHAH,PPP3CA,NEFL,NTRK2,THY1,SEPT7,PPFIA2	Ex_3/4_down
												GO:BP	cellular component organization	GO:0016043	7.28199e-05	4.13775	6499	53	36	18017	CCK,RTN4,HSP90AA1,STMN1,TMSB4X,CHN1,TMSB10,ENC1,CALM1,CALM3,MAP1B,PLCB1,SNAP25,DYNLL1,YWHAH,HSP90AB1,SIK3,PPP3CA,NEFL,NTRK2,KCND2,RTN3,THY1,SEPT7,PPFIA2,GPM6A,ACTB,LRRTM4,NRXN3,PRNP,TENM2,CLASP2,TUBA1B,NEGR1,PSAP,APP	Ex_3/4_down
												GO:BP	acidic amino acid transport	GO:0015800	8.1196e-05	4.09047	75	53	5	18017	CCK,SNAP25,GRM7,NTRK2,PPFIA2	Ex_3/4_down
												GO:BP	regulation of multicellular organismal process	GO:0051239	9.61423e-05	4.01709	3441	53	25	18017	CCK,RTN4,TMSB4X,CHN1,ENC1,CALM1,CALM3,MAP1B,PLCB1,SNAP25,YWHAH,HSP90AB1,PPP3CA,NEFL,NTRK2,KCND2,THY1,SEPT7,PKM,PPFIA2,CHRM3,PRNP,CLASP2,NEGR1,APP	Ex_3/4_down
												GO:BP	multicellular organism development	GO:0007275	9.61423e-05	4.01709	5638	53	33	18017	CCK,NRGN,RTN4,HSP90AA1,STMN1,CHN1,ENC1,CALM1,CALM3,CKB,MAP1B,PLCB1,SNAP25,DYNLL1,YWHAH,HSP90AB1,PPP3CA,NEFL,NTRK2,THY1,SEPT7,PKM,PPFIA2,GPM6A,CHRM3,ACTB,NRXN3,TENM2,ATRNL1,CLASP2,NEGR1,PSAP,APP	Ex_3/4_down
												GO:BP	cognition	GO:0050890	9.72019e-05	4.01233	312	53	8	18017	CCK,NRGN,PLCB1,SNAP25,NTRK2,NRXN3,PRNP,APP	Ex_3/4_down
												GO:BP	regulation of nervous system development	GO:0051960	0.000104785	3.9797	978	53	13	18017	RTN4,CHN1,ENC1,MAP1B,SNAP25,YWHAH,PPP3CA,NEFL,NTRK2,THY1,PPFIA2,NEGR1,APP	Ex_3/4_down
												GO:BP	cellular component biogenesis	GO:0044085	0.000112209	3.94997	3230	53	24	18017	CCK,RTN4,HSP90AA1,STMN1,TMSB4X,TMSB10,MAP1B,SNAP25,DYNLL1,HSP90AB1,NEFL,NTRK2,KCND2,RTN3,THY1,SEPT7,GPM6A,ACTB,NRXN3,PRNP,TENM2,CLASP2,PSAP,APP	Ex_3/4_down
												GO:BP	regulation of cellular component biogenesis	GO:0044087	0.000114424	3.94148	989	53	13	18017	CCK,HSP90AA1,STMN1,TMSB4X,TMSB10,MAP1B,NTRK2,THY1,SEPT7,GPM6A,TENM2,CLASP2,APP	Ex_3/4_down
												GO:BP	regulation of NMDA receptor activity	GO:2000310	0.000114424	3.94148	37	53	4	18017	GRIA4,NEFL,GRIA2,APP	Ex_3/4_down
												GO:BP	regulation of cellular localization	GO:0060341	0.000134804	3.8703	1005	53	13	18017	RTN4,HSP90AA1,CALM1,CALM3,MAP1B,VSNL1,YWHAH,HSP90AB1,THY1,PPFIA2,ACTB,NRXN3,PRNP	Ex_3/4_down
												GO:BP	regulation of cell development	GO:0060284	0.000134804	3.8703	1006	53	13	18017	RTN4,CHN1,ENC1,MAP1B,SNAP25,YWHAH,PPP3CA,NEFL,NTRK2,THY1,PPFIA2,NEGR1,APP	Ex_3/4_down
												GO:BP	cellular component organization or biogenesis	GO:0071840	0.000136951	3.86343	6686	53	36	18017	CCK,RTN4,HSP90AA1,STMN1,TMSB4X,CHN1,TMSB10,ENC1,CALM1,CALM3,MAP1B,PLCB1,SNAP25,DYNLL1,YWHAH,HSP90AB1,SIK3,PPP3CA,NEFL,NTRK2,KCND2,RTN3,THY1,SEPT7,PPFIA2,GPM6A,ACTB,LRRTM4,NRXN3,PRNP,TENM2,CLASP2,TUBA1B,NEGR1,PSAP,APP	Ex_3/4_down
												GO:BP	learning	GO:0007612	0.00015493	3.80986	154	53	6	18017	CCK,NRGN,SNAP25,NTRK2,NRXN3,APP	Ex_3/4_down
												GO:BP	vesicle-mediated transport	GO:0016192	0.00015493	3.80986	2156	53	19	18017	HSP90AA1,TMSB4X,CALM1,CALM3,FTH1,SNAP25,DYNLL1,VSNL1,HSP90AB1,PPP3CA,RTN3,PKM,PPFIA2,PCDH7,ACTB,NRXN3,CLASP2,PSAP,APP	Ex_3/4_down
												GO:BP	anatomical structure morphogenesis	GO:0009653	0.000177748	3.7502	2849	53	22	18017	CCK,RTN4,HSP90AA1,STMN1,CHN1,MAP1B,YWHAH,HSP90AB1,PPP3CA,NEFL,NTRK2,THY1,SEPT7,PKM,PPFIA2,GPM6A,ACTB,NRXN3,ATRNL1,CLASP2,PSAP,APP	Ex_3/4_down
												GO:BP	long-term synaptic potentiation	GO:0060291	0.000180027	3.74466	91	53	5	18017	NRGN,SNAP25,NTRK2,PRNP,APP	Ex_3/4_down
												GO:BP	transmembrane transport	GO:0055085	0.000283237	3.54785	1632	53	16	18017	TMSB4X,CALM1,CALM3,SNAP25,YWHAH,GRIA4,NEFL,KCND2,THY1,GPM6A,CHRM3,ACTB,PRNP,GRIA2,KCNQ5,APP	Ex_3/4_down
												GO:BP	regulation of binding	GO:0051098	0.00029914	3.52413	371	53	8	18017	STMN1,TMSB4X,CALM1,CALM3,HSP90AB1,PPP3CA,ACTB,APP	Ex_3/4_down
												GO:BP	positive regulation of hydrolase activity	GO:0051345	0.000316648	3.49942	775	53	11	18017	CCK,CHN1,CALM1,CALM3,PLCB1,DYNLL1,HSP90AB1,NTRK2,THY1,PSAP,APP	Ex_3/4_down
												GO:BP	dicarboxylic acid transport	GO:0006835	0.000316648	3.49942	103	53	5	18017	CCK,SNAP25,GRM7,NTRK2,PPFIA2	Ex_3/4_down
												GO:BP	phosphorylation	GO:0016310	0.000324067	3.48937	2501	53	20	18017	CCK,NRGN,HSP90AA1,PEBP1,CALM1,CALM3,CKB,PLCB1,DYNLL1,HSP90AB1,SIK3,NEFL,NTRK2,THY1,DGKB,PKM,ACTB,PRNP,PSAP,APP	Ex_3/4_down
												GO:BP	synaptic vesicle exocytosis	GO:0016079	0.00035692	3.44743	106	53	5	18017	CALM1,CALM3,SNAP25,PPFIA2,NRXN3	Ex_3/4_down
												GO:BP	multicellular organismal process	GO:0032501	0.000358458	3.44556	7992	53	39	18017	CCK,NRGN,RTN4,HSP90AA1,STMN1,TMSB4X,CHN1,ENC1,CALM1,CALM3,CKB,MAP1B,PLCB1,SNAP25,DYNLL1,YWHAH,HSP90AB1,PPP3CA,NEFL,GRM7,NTRK2,KCND2,THY1,DGKB,SEPT7,PKM,PPFIA2,GPM6A,CHRM3,ACTB,NRXN3,PRNP,TENM2,ATRNL1,CLASP2,NEGR1,PSAP,OXR1,APP	Ex_3/4_down
												GO:BP	establishment of protein localization to mitochondrial membrane	GO:0090151	0.000358458	3.44556	51	53	4	18017	HSP90AA1,CALM1,CALM3,YWHAH	Ex_3/4_down
												GO:BP	movement of cell or subcellular component	GO:0006928	0.000358692	3.44528	2301	53	19	18017	CCK,RTN4,STMN1,TMSB4X,CHN1,TMSB10,MAP1B,PLCB1,DYNLL1,PPP3CA,NEFL,NTRK2,THY1,GPM6A,ACTB,NRXN3,ATRNL1,CLASP2,APP	Ex_3/4_down
												GO:BP	positive regulation of transport	GO:0051050	0.000405332	3.39219	961	53	12	18017	CCK,TMSB4X,CALM1,CALM3,VSNL1,YWHAH,HSP90AB1,PPP3CA,THY1,ACTB,PRNP,CLASP2	Ex_3/4_down
												GO:BP	regulation of axonogenesis	GO:0050770	0.000434088	3.36242	189	53	6	18017	RTN4,CHN1,MAP1B,NEFL,NTRK2,THY1	Ex_3/4_down
												GO:BP	positive regulation of cell projection organization	GO:0031346	0.000466603	3.33105	400	53	8	18017	ENC1,MAP1B,NEFL,NTRK2,SEPT7,GPM6A,TENM2,NEGR1	Ex_3/4_down
												GO:BP	anatomical structure development	GO:0048856	0.00057309	3.24178	6143	53	33	18017	CCK,NRGN,RTN4,HSP90AA1,STMN1,CHN1,ENC1,CALM1,CALM3,CKB,MAP1B,PLCB1,SNAP25,DYNLL1,YWHAH,HSP90AB1,PPP3CA,NEFL,NTRK2,THY1,SEPT7,PKM,PPFIA2,GPM6A,CHRM3,ACTB,NRXN3,TENM2,ATRNL1,CLASP2,NEGR1,PSAP,APP	Ex_3/4_down
												GO:BP	response to nitrogen compound	GO:1901698	0.00057309	3.24178	1172	53	13	18017	CALM1,CALM3,MAP1B,PLCB1,HSP90AB1,PPP3CA,NEFL,NTRK2,PKM,CHRM3,ACTB,PRNP,APP	Ex_3/4_down
												GO:BP	cytoskeleton-dependent intracellular transport	GO:0030705	0.000604805	3.21838	202	53	6	18017	MAP1B,DYNLL1,NEFL,PPFIA2,TUBA1B,APP	Ex_3/4_down
												GO:BP	protein polymerization	GO:0051258	0.000604805	3.21838	302	53	7	18017	HSP90AA1,STMN1,TMSB4X,TMSB10,MAP1B,NEFL,CLASP2	Ex_3/4_down
												GO:BP	response to oxygen-containing compound	GO:1901700	0.000604805	3.21838	1755	53	16	18017	CALM1,CALM3,MAP1B,PLCB1,VSNL1,HSP90AB1,PPP3CA,NEFL,NTRK2,PKM,CHRM3,ACTB,PRNP,PSAP,OXR1,APP	Ex_3/4_down
												GO:BP	signaling	GO:0023052	0.000620919	3.20696	6814	53	35	18017	CCK,NRGN,RTN4,HSP90AA1,STMN1,TMSB4X,CHN1,PEBP1,CALM1,CALM3,MAP1B,PLCB1,SNAP25,VSNL1,YWHAH,GRIA4,HSP90AB1,SIK3,PPP3CA,NEFL,GRM7,NTRK2,KCND2,THY1,DGKB,PPFIA2,CHRM3,ACTB,NRXN3,PRNP,TENM2,ATRNL1,GRIA2,PSAP,APP	Ex_3/4_down
												GO:BP	regulation of secretion by cell	GO:1903530	0.000645595	3.19004	697	53	10	18017	CCK,CALM1,CALM3,SNAP25,VSNL1,PPP3CA,GRM7,PPFIA2,NRXN3,CLASP2	Ex_3/4_down
												GO:BP	positive regulation of phosphoprotein phosphatase activity	GO:0032516	0.000645595	3.19004	21	53	3	18017	CALM1,CALM3,HSP90AB1	Ex_3/4_down
												GO:BP	cell communication	GO:0007154	0.000645595	3.19004	6828	53	35	18017	CCK,NRGN,RTN4,HSP90AA1,STMN1,TMSB4X,CHN1,PEBP1,CALM1,CALM3,MAP1B,PLCB1,SNAP25,VSNL1,YWHAH,GRIA4,HSP90AB1,SIK3,PPP3CA,NEFL,GRM7,NTRK2,KCND2,THY1,DGKB,PPFIA2,CHRM3,ACTB,NRXN3,PRNP,TENM2,ATRNL1,GRIA2,PSAP,APP	Ex_3/4_down
												GO:BP	response to corticosterone	GO:0051412	0.000645595	3.19004	21	53	3	18017	CALM1,CALM3,NEFL	Ex_3/4_down
												GO:BP	positive regulation of cellular component biogenesis	GO:0044089	0.000659812	3.18058	557	53	9	18017	CCK,HSP90AA1,MAP1B,NTRK2,THY1,SEPT7,GPM6A,TENM2,CLASP2	Ex_3/4_down
												GO:BP	cellular protein localization	GO:0034613	0.000659812	3.18058	1985	53	17	18017	RTN4,HSP90AA1,TMSB4X,TMSB10,CALM1,CALM3,SNAP25,DYNLL1,YWHAH,HSP90AB1,PPP3CA,THY1,SEPT7,ACTB,PRNP,CLASP2,PSAP	Ex_3/4_down
												GO:BP	locomotory behavior	GO:0007626	0.000675653	3.17028	209	53	6	18017	SNAP25,KCND2,NEGR1,PSAP,OXR1,APP	Ex_3/4_down
												GO:BP	cellular macromolecule localization	GO:0070727	0.000697015	3.15676	1996	53	17	18017	RTN4,HSP90AA1,TMSB4X,TMSB10,CALM1,CALM3,SNAP25,DYNLL1,YWHAH,HSP90AB1,PPP3CA,THY1,SEPT7,ACTB,PRNP,CLASP2,PSAP	Ex_3/4_down
												GO:BP	regulation of exocytosis	GO:0017157	0.000701	3.15428	211	53	6	18017	CALM1,CALM3,VSNL1,PPFIA2,NRXN3,CLASP2	Ex_3/4_down
												GO:BP	platelet degranulation	GO:0002576	0.000701775	3.1538	127	53	5	18017	TMSB4X,CALM1,PCDH7,PSAP,APP	Ex_3/4_down
												GO:BP	regulation of synaptic vesicle exocytosis	GO:2000300	0.000730063	3.13664	64	53	4	18017	CALM1,CALM3,PPFIA2,NRXN3	Ex_3/4_down
												GO:BP	cell junction assembly	GO:0034329	0.000730063	3.13664	435	53	8	18017	MAP1B,NTRK2,THY1,GPM6A,ACTB,NRXN3,CLASP2,APP	Ex_3/4_down
												GO:BP	locomotion	GO:0040011	0.000780956	3.10737	2020	53	17	18017	CCK,RTN4,TMSB4X,CHN1,TMSB10,MAP1B,PLCB1,PPP3CA,NEFL,NTRK2,THY1,GPM6A,ACTB,NRXN3,ATRNL1,CLASP2,APP	Ex_3/4_down
												GO:BP	positive regulation of molecular function	GO:0044093	0.000908906	3.04148	1833	53	16	18017	CCK,HSP90AA1,STMN1,TMSB4X,CHN1,CALM1,CALM3,PLCB1,DYNLL1,HSP90AB1,PPP3CA,NTRK2,THY1,PRNP,PSAP,APP	Ex_3/4_down
												GO:BP	maintenance of location in cell	GO:0051651	0.000909966	3.04097	223	53	6	18017	TMSB4X,TMSB10,CALM1,CALM3,FTH1,THY1	Ex_3/4_down
												GO:BP	endoplasmic reticulum tubular network formation	GO:0071787	0.000965065	3.01544	4	53	2	18017	RTN4,RTN3	Ex_3/4_down
												GO:BP	ionotropic glutamate receptor signaling pathway	GO:0035235	0.000996474	3.00153	25	53	3	18017	GRIA4,GRIA2,APP	Ex_3/4_down
												GO:BP	developmental process	GO:0032502	0.00104251	2.98192	6676	53	34	18017	CCK,NRGN,RTN4,HSP90AA1,STMN1,CHN1,ENC1,CALM1,CALM3,CKB,MAP1B,PLCB1,SNAP25,DYNLL1,YWHAH,HSP90AB1,PPP3CA,NEFL,NTRK2,THY1,SEPT7,PKM,PPFIA2,GPM6A,CHRM3,ACTB,NRXN3,PRNP,TENM2,ATRNL1,CLASP2,NEGR1,PSAP,APP	Ex_3/4_down
												GO:BP	negative regulation of cellular component organization	GO:0051129	0.00104251	2.98192	750	53	10	18017	RTN4,STMN1,TMSB4X,TMSB10,MAP1B,YWHAH,PPP3CA,THY1,PRNP,CLASP2	Ex_3/4_down
												GO:BP	metal ion transport	GO:0030001	0.00104251	2.98192	911	53	11	18017	CALM1,CALM3,FTH1,SNAP25,YWHAH,PPP3CA,KCND2,THY1,GPM6A,PRNP,KCNQ5	Ex_3/4_down
												GO:BP	response to organonitrogen compound	GO:0010243	0.0010664	2.97208	1087	53	12	18017	CALM1,CALM3,MAP1B,HSP90AB1,PPP3CA,NEFL,NTRK2,PKM,CHRM3,ACTB,PRNP,APP	Ex_3/4_down
												GO:BP	regulation of secretion	GO:0051046	0.00109805	2.95938	756	53	10	18017	CCK,CALM1,CALM3,SNAP25,VSNL1,PPP3CA,GRM7,PPFIA2,NRXN3,CLASP2	Ex_3/4_down
												GO:BP	positive regulation of catalytic activity	GO:0043085	0.00117857	2.92864	1475	53	14	18017	CCK,HSP90AA1,TMSB4X,CHN1,CALM1,CALM3,PLCB1,DYNLL1,HSP90AB1,NTRK2,THY1,PRNP,PSAP,APP	Ex_3/4_down
												GO:BP	regulation of neurotransmitter receptor activity	GO:0099601	0.00118038	2.92798	74	53	4	18017	GRIA4,NEFL,GRIA2,APP	Ex_3/4_down
												GO:BP	biological adhesion	GO:0022610	0.0012229	2.91261	1482	53	14	18017	HSP90AB1,PPP3CA,THY1,PPFIA2,PCDH7,ACTB,NRXN3,PRNP,CNTNAP5,TENM2,ATRNL1,CLASP2,NEGR1,APP	Ex_3/4_down
												GO:BP	inorganic cation transmembrane transport	GO:0098662	0.00125689	2.9007	771	53	10	18017	TMSB4X,CALM1,CALM3,SNAP25,YWHAH,KCND2,THY1,GPM6A,PRNP,KCNQ5	Ex_3/4_down
												GO:BP	cell activation	GO:0001775	0.00134469	2.87138	1497	53	14	18017	HSP90AA1,PLCB1,FTH1,SNAP25,DYNLL1,HSP90AB1,PPP3CA,THY1,DGKB,PKM,ACTB,PRNP,PSAP,APP	Ex_3/4_down
												GO:BP	regulation of hydrolase activity	GO:0051336	0.00137365	2.86212	1307	53	13	18017	CCK,CHN1,PEBP1,CALM1,CALM3,PLCB1,DYNLL1,HSP90AB1,NTRK2,THY1,PRNP,PSAP,APP	Ex_3/4_down
												GO:BP	positive regulation of peptidyl-threonine phosphorylation	GO:0010800	0.00142726	2.8455	29	53	3	18017	CALM1,CALM3,APP	Ex_3/4_down
												GO:BP	cell differentiation	GO:0030154	0.00142726	2.8455	4388	53	26	18017	CCK,RTN4,HSP90AA1,STMN1,CHN1,ENC1,MAP1B,PLCB1,SNAP25,YWHAH,HSP90AB1,PPP3CA,NEFL,NTRK2,THY1,SEPT7,PPFIA2,GPM6A,ACTB,NRXN3,TENM2,ATRNL1,CLASP2,NEGR1,PSAP,APP	Ex_3/4_down
												GO:BP	positive regulation of cyclic-nucleotide phosphodiesterase activity	GO:0051343	0.00143818	2.84219	5	53	2	18017	CALM1,CALM3	Ex_3/4_down
												GO:BP	regulation of response to stimulus	GO:0048583	0.00146563	2.83397	4399	53	26	18017	CCK,RTN4,HSP90AA1,STMN1,TMSB4X,CHN1,PEBP1,CALM1,CALM3,PLCB1,VSNL1,YWHAH,GRIA4,HSP90AB1,SIK3,PPP3CA,NEFL,NTRK2,THY1,ACTB,PRNP,CLASP2,GRIA2,PSAP,OXR1,APP	Ex_3/4_down
												GO:BP	protein localization to membrane	GO:0072657	0.00174032	2.75937	649	53	9	18017	HSP90AA1,CALM1,CALM3,SNAP25,YWHAH,THY1,ACTB,PRNP,CLASP2	Ex_3/4_down
												GO:BP	negative regulation of supramolecular fiber organization	GO:1902904	0.00176114	2.75421	160	53	5	18017	STMN1,TMSB4X,TMSB10,MAP1B,CLASP2	Ex_3/4_down
												GO:BP	neuron apoptotic process	GO:0051402	0.00176141	2.75414	258	53	6	18017	HSP90AB1,NEFL,NTRK2,PRNP,OXR1,APP	Ex_3/4_down
												GO:BP	amino acid transport	GO:0006865	0.00177729	2.75024	161	53	5	18017	CCK,SNAP25,GRM7,NTRK2,PPFIA2	Ex_3/4_down
												GO:BP	associative learning	GO:0008306	0.00177729	2.75024	84	53	4	18017	CCK,NRGN,SNAP25,APP	Ex_3/4_down
												GO:BP	signal release from synapse	GO:0099643	0.00179395	2.74619	162	53	5	18017	CALM1,CALM3,SNAP25,PPFIA2,NRXN3	Ex_3/4_down
												GO:BP	neurotransmitter secretion	GO:0007269	0.00179395	2.74619	162	53	5	18017	CALM1,CALM3,SNAP25,PPFIA2,NRXN3	Ex_3/4_down
												GO:BP	G2/M transition of mitotic cell cycle	GO:0000086	0.00179395	2.74619	260	53	6	18017	HSP90AA1,CALM1,CALM3,PLCB1,DYNLL1,APP	Ex_3/4_down
												GO:BP	cellular developmental process	GO:0048869	0.00182164	2.73954	4468	53	26	18017	CCK,RTN4,HSP90AA1,STMN1,CHN1,ENC1,MAP1B,PLCB1,SNAP25,YWHAH,HSP90AB1,PPP3CA,NEFL,NTRK2,THY1,SEPT7,PPFIA2,GPM6A,ACTB,NRXN3,TENM2,ATRNL1,CLASP2,NEGR1,PSAP,APP	Ex_3/4_down
												GO:BP	regulation of cell differentiation	GO:0045595	0.00184115	2.73491	1976	53	16	18017	RTN4,CHN1,ENC1,MAP1B,PLCB1,SNAP25,YWHAH,HSP90AB1,PPP3CA,NEFL,NTRK2,THY1,PPFIA2,CLASP2,NEGR1,APP	Ex_3/4_down
												GO:BP	phosphate-containing compound metabolic process	GO:0006796	0.00188759	2.72409	3408	53	22	18017	CCK,NRGN,HSP90AA1,TMSB4X,PEBP1,CALM1,CALM3,CKB,PLCB1,DYNLL1,HSP90AB1,SIK3,PPP3CA,NEFL,NTRK2,THY1,DGKB,PKM,ACTB,PRNP,PSAP,APP	Ex_3/4_down
												GO:BP	regulation of amyloid-beta formation	GO:1902003	0.00191283	2.71832	33	53	3	18017	NTRK2,PRNP,APP	Ex_3/4_down
												GO:BP	response to mineralocorticoid	GO:0051385	0.00191283	2.71832	33	53	3	18017	CALM1,CALM3,NEFL	Ex_3/4_down
												GO:BP	telomerase holoenzyme complex assembly	GO:1905323	0.00193788	2.71267	6	53	2	18017	HSP90AA1,HSP90AB1	Ex_3/4_down
												GO:BP	postsynaptic modulation of chemical synaptic transmission	GO:0099170	0.00193788	2.71267	6	53	2	18017	NRGN,PPP3CA	Ex_3/4_down
												GO:BP	negative regulation of cytoskeleton organization	GO:0051494	0.00196647	2.70631	167	53	5	18017	STMN1,TMSB4X,TMSB10,MAP1B,CLASP2	Ex_3/4_down
												GO:BP	positive regulation of phosphatase activity	GO:0010922	0.00202958	2.69259	34	53	3	18017	CALM1,CALM3,HSP90AB1	Ex_3/4_down
												GO:BP	phosphorus metabolic process	GO:0006793	0.00202958	2.69259	3434	53	22	18017	CCK,NRGN,HSP90AA1,TMSB4X,PEBP1,CALM1,CALM3,CKB,PLCB1,DYNLL1,HSP90AB1,SIK3,PPP3CA,NEFL,NTRK2,THY1,DGKB,PKM,ACTB,PRNP,PSAP,APP	Ex_3/4_down
												GO:BP	regulation of cellular process	GO:0050794	0.0020477	2.68873	11418	53	46	18017	CCK,NRGN,RTN4,HSP90AA1,STMN1,TMSB4X,CHN1,PEBP1,TMSB10,ENC1,CALM1,CALM3,MAP1B,PLCB1,FTH1,SNAP25,DYNLL1,VSNL1,YWHAH,GRIA4,HSP90AB1,SIK3,PPP3CA,NEFL,GRM7,NTRK2,KCND2,THY1,DGKB,SEPT7,PKM,PPFIA2,GPM6A,CHRM3,ACTB,NRXN3,PRNP,TENM2,ATRNL1,CLASP2,NEGR1,GRIA2,KCNQ5,PSAP,OXR1,APP	Ex_3/4_down
												GO:BP	negative regulation of calcium-mediated signaling	GO:0050849	0.00218816	2.65992	35	53	3	18017	CALM1,CALM3,PRNP	Ex_3/4_down
												GO:BP	positive regulation of synaptic transmission	GO:0050806	0.00218989	2.65958	172	53	5	18017	NRGN,SNAP25,NTRK2,PRNP,APP	Ex_3/4_down
												GO:BP	cellular chemical homeostasis	GO:0055082	0.00221223	2.65517	845	53	10	18017	RTN4,CALM1,CALM3,CKB,FTH1,VSNL1,PPP3CA,THY1,PRNP,APP	Ex_3/4_down
												GO:BP	response to stimulus	GO:0050896	0.00221223	2.65517	9430	53	41	18017	CCK,NRGN,RTN4,HSP90AA1,STMN1,TMSB4X,CHN1,PEBP1,CALM1,CALM3,MAP1B,PLCB1,FTH1,SNAP25,DYNLL1,VSNL1,YWHAH,GRIA4,HSP90AB1,SIK3,PPP3CA,NEFL,GRM7,NTRK2,KCND2,THY1,DGKB,PKM,GPM6A,CHRM3,ACTB,NRXN3,PRNP,TENM2,ATRNL1,CLASP2,TUBA1B,GRIA2,PSAP,OXR1,APP	Ex_3/4_down
												GO:BP	positive regulation of response to stimulus	GO:0048584	0.00221223	2.65517	2476	53	18	18017	CCK,RTN4,HSP90AA1,TMSB4X,CALM1,CALM3,PLCB1,VSNL1,YWHAH,HSP90AB1,SIK3,PPP3CA,NTRK2,THY1,ACTB,PRNP,PSAP,APP	Ex_3/4_down
												GO:BP	regulation of protein tyrosine kinase activity	GO:0061097	0.00222147	2.65336	92	53	4	18017	NTRK2,THY1,PRNP,APP	Ex_3/4_down
												GO:BP	response to amphetamine	GO:0001975	0.00226303	2.64531	36	53	3	18017	CALM1,CALM3,PPP3CA	Ex_3/4_down
												GO:BP	regulation of neurotransmitter secretion	GO:0046928	0.00226303	2.64531	93	53	4	18017	CALM1,CALM3,PPFIA2,NRXN3	Ex_3/4_down
												GO:BP	cell cycle G2/M phase transition	GO:0044839	0.00226303	2.64531	278	53	6	18017	HSP90AA1,CALM1,CALM3,PLCB1,DYNLL1,APP	Ex_3/4_down
												GO:BP	developmental growth	GO:0048589	0.00226303	2.64531	687	53	9	18017	RTN4,HSP90AA1,MAP1B,PLCB1,HSP90AB1,PPP3CA,PKM,PSAP,APP	Ex_3/4_down
												GO:BP	positive regulation of binding	GO:0051099	0.00231286	2.63585	176	53	5	18017	STMN1,CALM1,CALM3,HSP90AB1,APP	Ex_3/4_down
												GO:BP	regulation of multicellular organismal development	GO:2000026	0.00232606	2.63338	2262	53	17	18017	RTN4,CHN1,ENC1,MAP1B,PLCB1,SNAP25,YWHAH,PPP3CA,NEFL,NTRK2,THY1,SEPT7,PKM,PPFIA2,CLASP2,NEGR1,APP	Ex_3/4_down
												GO:BP	synaptic vesicle cycle	GO:0099504	0.00234799	2.6293	177	53	5	18017	CALM1,CALM3,SNAP25,PPFIA2,NRXN3	Ex_3/4_down
												GO:BP	regulation of anatomical structure morphogenesis	GO:0022603	0.00237495	2.62434	1218	53	12	18017	RTN4,CHN1,MAP1B,YWHAH,PPP3CA,NEFL,NTRK2,THY1,SEPT7,PKM,PPFIA2,CLASP2	Ex_3/4_down
												GO:BP	regulation of synaptic vesicle cycle	GO:0098693	0.0023882	2.62193	95	53	4	18017	CALM1,CALM3,PPFIA2,NRXN3	Ex_3/4_down
												GO:BP	inorganic ion transmembrane transport	GO:0098660	0.0024339	2.6137	862	53	10	18017	TMSB4X,CALM1,CALM3,SNAP25,YWHAH,KCND2,THY1,GPM6A,PRNP,KCNQ5	Ex_3/4_down
												GO:BP	microtubule-based process	GO:0007017	0.00246649	2.60792	864	53	10	18017	STMN1,CALM1,CALM3,MAP1B,DYNLL1,SIK3,NEFL,CLASP2,TUBA1B,APP	Ex_3/4_down
												GO:BP	Wnt signaling pathway, calcium modulating pathway	GO:0007223	0.00254105	2.59499	38	53	3	18017	CALM1,PLCB1,PPP3CA	Ex_3/4_down
												GO:BP	synapse assembly	GO:0007416	0.00258573	2.58742	182	53	5	18017	MAP1B,NTRK2,GPM6A,NRXN3,APP	Ex_3/4_down
												GO:BP	chemical homeostasis	GO:0048878	0.00260493	2.5842	1235	53	12	18017	CCK,RTN4,STMN1,CALM1,CALM3,CKB,FTH1,VSNL1,PPP3CA,THY1,PRNP,APP	Ex_3/4_down
												GO:BP	negative regulation of cell morphogenesis involved in differentiation	GO:0010771	0.00260493	2.5842	98	53	4	18017	RTN4,YWHAH,PPP3CA,THY1	Ex_3/4_down
												GO:BP	amyloid-beta formation	GO:0034205	0.00268801	2.57057	39	53	3	18017	NTRK2,PRNP,APP	Ex_3/4_down
												GO:BP	cellular response to oxygen-containing compound	GO:1901701	0.00269275	2.5698	1241	53	12	18017	MAP1B,PLCB1,VSNL1,PPP3CA,NTRK2,PKM,CHRM3,ACTB,PRNP,PSAP,OXR1,APP	Ex_3/4_down
												GO:BP	nervous system process	GO:0050877	0.00279009	2.55438	1443	53	13	18017	CCK,NRGN,PLCB1,SNAP25,PPP3CA,NEFL,GRM7,NTRK2,KCND2,NRXN3,PRNP,PSAP,APP	Ex_3/4_down
												GO:BP	negative regulation of microtubule polymerization or depolymerization	GO:0031111	0.00282402	2.54913	40	53	3	18017	STMN1,MAP1B,CLASP2	Ex_3/4_down
												GO:BP	positive regulation of release of sequestered calcium ion into cytosol	GO:0051281	0.00282402	2.54913	40	53	3	18017	CALM1,CALM3,THY1	Ex_3/4_down
												GO:BP	regulation of amyloid precursor protein catabolic process	GO:1902991	0.00282402	2.54913	40	53	3	18017	NTRK2,PRNP,APP	Ex_3/4_down
												GO:BP	vesicle-mediated transport in synapse	GO:0099003	0.00286528	2.54283	188	53	5	18017	CALM1,CALM3,SNAP25,PPFIA2,NRXN3	Ex_3/4_down
												GO:BP	positive regulation of tau-protein kinase activity	GO:1902949	0.00293205	2.53283	8	53	2	18017	HSP90AA1,HSP90AB1	Ex_3/4_down
												GO:BP	cellular response to stimulus	GO:0051716	0.00293205	2.53283	7777	53	36	18017	CCK,NRGN,RTN4,HSP90AA1,STMN1,TMSB4X,CHN1,PEBP1,CALM1,CALM3,MAP1B,PLCB1,VSNL1,YWHAH,GRIA4,HSP90AB1,SIK3,PPP3CA,NEFL,GRM7,NTRK2,KCND2,THY1,DGKB,PKM,CHRM3,ACTB,NRXN3,PRNP,TENM2,ATRNL1,TUBA1B,GRIA2,PSAP,OXR1,APP	Ex_3/4_down
												GO:BP	regulation of phosphate metabolic process	GO:0019220	0.00293205	2.53283	1877	53	15	18017	CCK,HSP90AA1,TMSB4X,PEBP1,CALM1,CALM3,PLCB1,DYNLL1,HSP90AB1,NTRK2,THY1,ACTB,PRNP,PSAP,APP	Ex_3/4_down
												GO:BP	positive regulation of ryanodine-sensitive calcium-release channel activity	GO:0060316	0.00293205	2.53283	8	53	2	18017	CALM1,CALM3	Ex_3/4_down
												GO:BP	negative regulation of cell projection organization	GO:0031345	0.00293205	2.53283	190	53	5	18017	RTN4,YWHAH,PPP3CA,THY1,PRNP	Ex_3/4_down
												GO:BP	regulation of phosphorus metabolic process	GO:0051174	0.00293205	2.53283	1878	53	15	18017	CCK,HSP90AA1,TMSB4X,PEBP1,CALM1,CALM3,PLCB1,DYNLL1,HSP90AB1,NTRK2,THY1,ACTB,PRNP,PSAP,APP	Ex_3/4_down
												GO:BP	feeding behavior	GO:0007631	0.00293205	2.53283	103	53	4	18017	CCK,NTRK2,NEGR1,APP	Ex_3/4_down
												GO:BP	regulation of intracellular signal transduction	GO:1902531	0.00299019	2.5243	1883	53	15	18017	RTN4,HSP90AA1,STMN1,TMSB4X,CHN1,PEBP1,CALM1,CALM3,PLCB1,HSP90AB1,SIK3,NTRK2,PRNP,PSAP,APP	Ex_3/4_down
												GO:BP	regulation of phosphorylation	GO:0042325	0.0030939	2.50949	1675	53	14	18017	CCK,HSP90AA1,PEBP1,CALM1,CALM3,PLCB1,DYNLL1,HSP90AB1,NTRK2,THY1,ACTB,PRNP,PSAP,APP	Ex_3/4_down
												GO:BP	cell adhesion	GO:0007155	0.00320857	2.49369	1475	53	13	18017	PPP3CA,THY1,PPFIA2,PCDH7,ACTB,NRXN3,PRNP,CNTNAP5,TENM2,ATRNL1,CLASP2,NEGR1,APP	Ex_3/4_down
												GO:BP	regulation of calcium ion transport into cytosol	GO:0010522	0.00320857	2.49369	106	53	4	18017	CALM1,CALM3,THY1,PRNP	Ex_3/4_down
												GO:BP	response to inorganic substance	GO:0010035	0.0032643	2.48621	580	53	8	18017	CALM1,CALM3,MAP1B,PPP3CA,NEFL,PRNP,PSAP,APP	Ex_3/4_down
												GO:BP	regulation of neurotransmitter transport	GO:0051588	0.0032935	2.48234	107	53	4	18017	CALM1,CALM3,PPFIA2,NRXN3	Ex_3/4_down
												GO:BP	positive regulation of protein dephosphorylation	GO:0035307	0.00346407	2.46041	44	53	3	18017	CALM1,CALM3,HSP90AB1	Ex_3/4_down
												GO:BP	positive regulation of cell communication	GO:0010647	0.00346407	2.46041	1914	53	15	18017	NRGN,RTN4,HSP90AA1,CALM1,CALM3,PLCB1,SNAP25,VSNL1,YWHAH,HSP90AB1,SIK3,NTRK2,PRNP,PSAP,APP	Ex_3/4_down
												GO:BP	regulation of cell communication by electrical coupling involved in cardiac conduction	GO:1901844	0.00349216	2.45691	9	53	2	18017	CALM1,CALM3	Ex_3/4_down
												GO:BP	intracellular signal transduction	GO:0035556	0.00349216	2.45691	2854	53	19	18017	RTN4,HSP90AA1,STMN1,TMSB4X,CHN1,PEBP1,CALM1,CALM3,PLCB1,HSP90AB1,SIK3,PPP3CA,NEFL,NTRK2,DGKB,CHRM3,PRNP,PSAP,APP	Ex_3/4_down
												GO:BP	positive regulation of signaling	GO:0023056	0.00349216	2.45691	1920	53	15	18017	NRGN,RTN4,HSP90AA1,CALM1,CALM3,PLCB1,SNAP25,VSNL1,YWHAH,HSP90AB1,SIK3,NTRK2,PRNP,PSAP,APP	Ex_3/4_down
												GO:BP	modulation of age-related behavioral decline	GO:0090647	0.00349216	2.45691	9	53	2	18017	PRNP,APP	Ex_3/4_down
												GO:BP	peripheral nervous system axon regeneration	GO:0014012	0.00349216	2.45691	9	53	2	18017	MAP1B,NEFL	Ex_3/4_down
												GO:BP	positive regulation of peptidyl-serine phosphorylation	GO:0033138	0.00364687	2.43808	111	53	4	18017	HSP90AA1,HSP90AB1,NTRK2,APP	Ex_3/4_down
												GO:BP	microtubule cytoskeleton organization	GO:0000226	0.00365353	2.43729	594	53	8	18017	STMN1,CALM1,CALM3,MAP1B,SIK3,NEFL,CLASP2,TUBA1B	Ex_3/4_down
												GO:BP	regulation of protein phosphorylation	GO:0001932	0.00371344	2.43022	1506	53	13	18017	CCK,HSP90AA1,PEBP1,CALM1,CALM3,PLCB1,HSP90AB1,NTRK2,THY1,ACTB,PRNP,PSAP,APP	Ex_3/4_down
												GO:BP	establishment or maintenance of cell polarity	GO:0007163	0.00388417	2.4107	206	53	5	18017	HSP90AA1,MAP1B,HSP90AB1,ACTB,CLASP2	Ex_3/4_down
												GO:BP	regulation of catalytic activity	GO:0050790	0.00391327	2.40746	2402	53	17	18017	CCK,HSP90AA1,TMSB4X,CHN1,PEBP1,CALM1,CALM3,PLCB1,DYNLL1,HSP90AB1,GRM7,NTRK2,THY1,ACTB,PRNP,PSAP,APP	Ex_3/4_down
												GO:BP	microtubule depolymerization	GO:0007019	0.00398388	2.39969	47	53	3	18017	STMN1,MAP1B,CLASP2	Ex_3/4_down
												GO:BP	regulation of peptidyl-threonine phosphorylation	GO:0010799	0.00398388	2.39969	47	53	3	18017	CALM1,CALM3,APP	Ex_3/4_down
												GO:BP	mitotic cell cycle phase transition	GO:0044772	0.00405674	2.39182	606	53	8	18017	HSP90AA1,CALM1,CALM3,PLCB1,DYNLL1,PPP3CA,CLASP2,APP	Ex_3/4_down
												GO:BP	regeneration	GO:0031099	0.00405674	2.39182	209	53	5	18017	MAP1B,PPP3CA,NEFL,THY1,PKM	Ex_3/4_down
												GO:BP	regulation of cyclic-nucleotide phosphodiesterase activity	GO:0051342	0.00413985	2.38302	10	53	2	18017	CALM1,CALM3	Ex_3/4_down
												GO:BP	neuron projection maintenance	GO:1990535	0.00413985	2.38302	10	53	2	18017	PRNP,APP	Ex_3/4_down
												GO:BP	regulation of long-term synaptic potentiation	GO:1900271	0.004146	2.38237	48	53	3	18017	NRGN,PRNP,APP	Ex_3/4_down
												GO:BP	regulation of synapse organization	GO:0050807	0.00444027	2.35259	214	53	5	18017	NTRK2,PPFIA2,GPM6A,PRNP,APP	Ex_3/4_down
												GO:BP	amyloid-beta metabolic process	GO:0050435	0.004617	2.33564	50	53	3	18017	NTRK2,PRNP,APP	Ex_3/4_down
												GO:BP	amyloid precursor protein catabolic process	GO:0042987	0.004617	2.33564	50	53	3	18017	NTRK2,PRNP,APP	Ex_3/4_down
												GO:BP	neurotransmitter transport	GO:0006836	0.00465463	2.33212	217	53	5	18017	CALM1,CALM3,SNAP25,PPFIA2,NRXN3	Ex_3/4_down
												GO:BP	maintenance of location	GO:0051235	0.00465463	2.33212	335	53	6	18017	TMSB4X,TMSB10,CALM1,CALM3,FTH1,THY1	Ex_3/4_down
												GO:BP	response to amine	GO:0014075	0.00477419	2.3211	51	53	3	18017	CALM1,CALM3,PPP3CA	Ex_3/4_down
												GO:BP	cerebral cortex development	GO:0021987	0.00477419	2.3211	122	53	4	18017	RTN4,PLCB1,NEFL,NTRK2	Ex_3/4_down
												GO:BP	regulation of nitric-oxide synthase activity	GO:0050999	0.00477419	2.3211	51	53	3	18017	HSP90AA1,CALM1,CALM3	Ex_3/4_down
												GO:BP	establishment of protein localization to membrane	GO:0090150	0.00477419	2.3211	337	53	6	18017	HSP90AA1,CALM1,CALM3,SNAP25,YWHAH,PRNP	Ex_3/4_down
												GO:BP	negative regulation of ryanodine-sensitive calcium-release channel activity	GO:0060315	0.00481288	2.3176	11	53	2	18017	CALM1,CALM3	Ex_3/4_down
												GO:BP	homeostatic process	GO:0042592	0.00498189	2.30261	2003	53	15	18017	CCK,RTN4,HSP90AA1,STMN1,CALM1,CALM3,CKB,FTH1,VSNL1,HSP90AB1,PPP3CA,THY1,ACTB,PRNP,APP	Ex_3/4_down
												GO:BP	axon extension	GO:0048675	0.00501258	2.29994	124	53	4	18017	RTN4,HSP90AA1,MAP1B,HSP90AB1	Ex_3/4_down
												GO:BP	regulation of neurotransmitter levels	GO:0001505	0.00508719	2.29352	223	53	5	18017	CALM1,CALM3,SNAP25,PPFIA2,NRXN3	Ex_3/4_down
												GO:BP	calcium-mediated signaling	GO:0019722	0.00523186	2.28134	225	53	5	18017	CALM1,CALM3,PPP3CA,CHRM3,PRNP	Ex_3/4_down
												GO:BP	regulation of synapse structure or activity	GO:0050803	0.00523186	2.28134	225	53	5	18017	NTRK2,PPFIA2,GPM6A,PRNP,APP	Ex_3/4_down
												GO:BP	neutrophil degranulation	GO:0043312	0.00523186	2.28134	484	53	7	18017	HSP90AA1,FTH1,SNAP25,DYNLL1,HSP90AB1,PKM,PSAP	Ex_3/4_down
												GO:BP	regulation of neuron apoptotic process	GO:0043523	0.00531625	2.27439	226	53	5	18017	HSP90AB1,NEFL,NTRK2,PRNP,OXR1	Ex_3/4_down
												GO:BP	regulation of signal transduction	GO:0009966	0.00534506	2.27205	3236	53	20	18017	RTN4,HSP90AA1,STMN1,TMSB4X,CHN1,PEBP1,CALM1,CALM3,PLCB1,YWHAH,GRIA4,HSP90AB1,SIK3,NEFL,NTRK2,THY1,PRNP,GRIA2,PSAP,APP	Ex_3/4_down
												GO:BP	neutrophil activation involved in immune response	GO:0002283	0.00535851	2.27096	487	53	7	18017	HSP90AA1,FTH1,SNAP25,DYNLL1,HSP90AB1,PKM,PSAP	Ex_3/4_down
												GO:BP	regulation of protein kinase activity	GO:0045859	0.00537231	2.26984	810	53	9	18017	HSP90AA1,CALM1,CALM3,HSP90AB1,NTRK2,THY1,ACTB,PRNP,APP	Ex_3/4_down
												GO:BP	positive regulation of calcium ion transport into cytosol	GO:0010524	0.00537231	2.26984	54	53	3	18017	CALM1,CALM3,THY1	Ex_3/4_down
												GO:BP	positive regulation of phosphorus metabolic process	GO:0010562	0.00545543	2.26317	1184	53	11	18017	CCK,HSP90AA1,TMSB4X,CALM1,CALM3,PLCB1,HSP90AB1,NTRK2,PRNP,PSAP,APP	Ex_3/4_down
												GO:BP	positive regulation of phosphate metabolic process	GO:0045937	0.00545543	2.26317	1184	53	11	18017	CCK,HSP90AA1,TMSB4X,CALM1,CALM3,PLCB1,HSP90AB1,NTRK2,PRNP,PSAP,APP	Ex_3/4_down
												GO:BP	negative regulation of neuron differentiation	GO:0045665	0.00545543	2.26317	229	53	5	18017	RTN4,YWHAH,PPP3CA,THY1,APP	Ex_3/4_down
												GO:BP	postsynaptic cytoskeleton organization	GO:0099188	0.00545543	2.26317	12	53	2	18017	NEFL,ACTB	Ex_3/4_down
												GO:BP	sequestering of actin monomers	GO:0042989	0.00545543	2.26317	12	53	2	18017	TMSB4X,TMSB10	Ex_3/4_down
												GO:BP	positive regulation of biological process	GO:0048518	0.00546786	2.26218	6416	53	31	18017	CCK,NRGN,RTN4,HSP90AA1,STMN1,TMSB4X,ENC1,CALM1,CALM3,MAP1B,PLCB1,SNAP25,VSNL1,YWHAH,HSP90AB1,SIK3,PPP3CA,NEFL,NTRK2,THY1,SEPT7,PKM,GPM6A,CHRM3,ACTB,PRNP,TENM2,CLASP2,NEGR1,PSAP,APP	Ex_3/4_down
												GO:BP	positive regulation of cellular process	GO:0048522	0.00561184	2.25089	5803	53	29	18017	CCK,NRGN,RTN4,HSP90AA1,STMN1,TMSB4X,ENC1,CALM1,CALM3,MAP1B,PLCB1,SNAP25,VSNL1,YWHAH,HSP90AB1,SIK3,PPP3CA,NEFL,NTRK2,THY1,SEPT7,PKM,GPM6A,PRNP,TENM2,CLASP2,NEGR1,PSAP,APP	Ex_3/4_down
												GO:BP	cell cycle phase transition	GO:0044770	0.00568236	2.24547	651	53	8	18017	HSP90AA1,CALM1,CALM3,PLCB1,DYNLL1,PPP3CA,CLASP2,APP	Ex_3/4_down
												GO:BP	protein phosphorylation	GO:0006468	0.00572311	2.24237	2044	53	15	18017	CCK,HSP90AA1,PEBP1,CALM1,CALM3,PLCB1,HSP90AB1,SIK3,NEFL,NTRK2,THY1,ACTB,PRNP,PSAP,APP	Ex_3/4_down
												GO:BP	localization of cell	GO:0051674	0.005785	2.2377	1823	53	14	18017	CCK,RTN4,TMSB4X,TMSB10,MAP1B,PLCB1,PPP3CA,NTRK2,THY1,GPM6A,ACTB,ATRNL1,CLASP2,APP	Ex_3/4_down
												GO:BP	neutrophil mediated immunity	GO:0002446	0.005785	2.2377	498	53	7	18017	HSP90AA1,FTH1,SNAP25,DYNLL1,HSP90AB1,PKM,PSAP	Ex_3/4_down
												GO:BP	cell motility	GO:0048870	0.005785	2.2377	1823	53	14	18017	CCK,RTN4,TMSB4X,TMSB10,MAP1B,PLCB1,PPP3CA,NTRK2,THY1,GPM6A,ACTB,ATRNL1,CLASP2,APP	Ex_3/4_down
												GO:BP	cellular homeostasis	GO:0019725	0.00579228	2.23715	1006	53	10	18017	RTN4,CALM1,CALM3,CKB,FTH1,VSNL1,PPP3CA,THY1,PRNP,APP	Ex_3/4_down
												GO:BP	regulation of protein polymerization	GO:0032271	0.00579228	2.23715	234	53	5	18017	HSP90AA1,STMN1,TMSB4X,TMSB10,MAP1B	Ex_3/4_down
												GO:BP	neutrophil activation	GO:0042119	0.00585558	2.23243	500	53	7	18017	HSP90AA1,FTH1,SNAP25,DYNLL1,HSP90AB1,PKM,PSAP	Ex_3/4_down
												GO:BP	neuromuscular process controlling balance	GO:0050885	0.00590826	2.22854	57	53	3	18017	NEFL,PSAP,APP	Ex_3/4_down
												GO:BP	detection of calcium ion	GO:0005513	0.00600439	2.22153	13	53	2	18017	CALM1,CALM3	Ex_3/4_down
												GO:BP	cytoskeleton organization	GO:0007010	0.00600439	2.22153	1407	53	12	18017	STMN1,TMSB4X,TMSB10,CALM1,CALM3,MAP1B,SIK3,NEFL,THY1,ACTB,CLASP2,TUBA1B	Ex_3/4_down
												GO:BP	regulation of tau-protein kinase activity	GO:1902947	0.00600439	2.22153	13	53	2	18017	HSP90AA1,HSP90AB1	Ex_3/4_down
												GO:BP	negative regulation of long-term synaptic potentiation	GO:1900272	0.00600439	2.22153	13	53	2	18017	PRNP,APP	Ex_3/4_down
												GO:BP	carboxylic acid transport	GO:0046942	0.00602639	2.21994	362	53	6	18017	CCK,SNAP25,GRM7,NTRK2,PPFIA2,PSAP	Ex_3/4_down
												GO:BP	positive regulation of dephosphorylation	GO:0035306	0.0060779	2.21625	58	53	3	18017	CALM1,CALM3,HSP90AB1	Ex_3/4_down
												GO:BP	granulocyte activation	GO:0036230	0.00609586	2.21496	506	53	7	18017	HSP90AA1,FTH1,SNAP25,DYNLL1,HSP90AB1,PKM,PSAP	Ex_3/4_down
												GO:BP	Fc receptor signaling pathway	GO:0038093	0.00613598	2.21212	239	53	5	18017	HSP90AA1,CALM1,HSP90AB1,PPP3CA,ACTB	Ex_3/4_down
												GO:BP	system process	GO:0003008	0.0061518	2.211	2303	53	16	18017	CCK,NRGN,CALM1,CALM3,PLCB1,SNAP25,PPP3CA,NEFL,GRM7,NTRK2,KCND2,CHRM3,NRXN3,PRNP,PSAP,APP	Ex_3/4_down
												GO:BP	cell cycle process	GO:0022402	0.0061518	2.211	1415	53	12	18017	HSP90AA1,STMN1,CALM1,CALM3,PLCB1,DYNLL1,HSP90AB1,PPP3CA,SEPT7,PRNP,CLASP2,APP	Ex_3/4_down
												GO:BP	organic acid transport	GO:0015849	0.00615335	2.21089	365	53	6	18017	CCK,SNAP25,GRM7,NTRK2,PPFIA2,PSAP	Ex_3/4_down
												GO:BP	immune response-regulating cell surface receptor signaling pathway	GO:0002768	0.00619666	2.20784	509	53	7	18017	HSP90AA1,CALM1,HSP90AB1,PPP3CA,THY1,ACTB,PRNP	Ex_3/4_down
												GO:BP	myeloid leukocyte activation	GO:0002274	0.00621354	2.20666	668	53	8	18017	HSP90AA1,FTH1,SNAP25,DYNLL1,HSP90AB1,PKM,PSAP,APP	Ex_3/4_down
												GO:BP	developmental cell growth	GO:0048588	0.00623204	2.20537	241	53	5	18017	RTN4,HSP90AA1,MAP1B,HSP90AB1,APP	Ex_3/4_down
												GO:BP	immune response-regulating signaling pathway	GO:0002764	0.00632243	2.19912	512	53	7	18017	HSP90AA1,CALM1,HSP90AB1,PPP3CA,THY1,ACTB,PRNP	Ex_3/4_down
												GO:BP	developmental growth involved in morphogenesis	GO:0060560	0.00632243	2.19912	242	53	5	18017	RTN4,HSP90AA1,MAP1B,HSP90AB1,APP	Ex_3/4_down
												GO:BP	neuron death	GO:0070997	0.00655519	2.18341	371	53	6	18017	HSP90AB1,NEFL,NTRK2,PRNP,OXR1,APP	Ex_3/4_down
												GO:BP	cellular copper ion homeostasis	GO:0006878	0.00659381	2.18086	14	53	2	18017	PRNP,APP	Ex_3/4_down
												GO:BP	negative regulation of amyloid-beta formation	GO:1902430	0.00659381	2.18086	14	53	2	18017	NTRK2,PRNP	Ex_3/4_down
												GO:BP	regulation of cell communication by electrical coupling	GO:0010649	0.00659381	2.18086	14	53	2	18017	CALM1,CALM3	Ex_3/4_down
												GO:BP	neuron projection regeneration	GO:0031102	0.00667049	2.17584	61	53	3	18017	MAP1B,NEFL,THY1	Ex_3/4_down
												GO:BP	positive regulation of protein phosphorylation	GO:0001934	0.00676366	2.16982	1039	53	10	18017	CCK,HSP90AA1,CALM1,CALM3,PLCB1,HSP90AB1,NTRK2,PRNP,PSAP,APP	Ex_3/4_down
												GO:BP	establishment of protein localization to mitochondrion	GO:0072655	0.00676366	2.16982	141	53	4	18017	HSP90AA1,CALM1,CALM3,YWHAH	Ex_3/4_down
												GO:BP	cell migration	GO:0016477	0.00676366	2.16982	1651	53	13	18017	CCK,RTN4,TMSB4X,TMSB10,MAP1B,PLCB1,PPP3CA,NTRK2,THY1,GPM6A,ATRNL1,CLASP2,APP	Ex_3/4_down
												GO:BP	regulation of developmental process	GO:0050793	0.0070515	2.15172	2833	53	18	18017	RTN4,CHN1,ENC1,MAP1B,PLCB1,SNAP25,YWHAH,HSP90AB1,PPP3CA,NEFL,NTRK2,THY1,SEPT7,PKM,PPFIA2,CLASP2,NEGR1,APP	Ex_3/4_down
												GO:BP	regulation of biological process	GO:0050789	0.00705506	2.1515	12038	53	46	18017	CCK,NRGN,RTN4,HSP90AA1,STMN1,TMSB4X,CHN1,PEBP1,TMSB10,ENC1,CALM1,CALM3,MAP1B,PLCB1,FTH1,SNAP25,DYNLL1,VSNL1,YWHAH,GRIA4,HSP90AB1,SIK3,PPP3CA,NEFL,GRM7,NTRK2,KCND2,THY1,DGKB,SEPT7,PKM,PPFIA2,GPM6A,CHRM3,ACTB,NRXN3,PRNP,TENM2,ATRNL1,CLASP2,NEGR1,GRIA2,KCNQ5,PSAP,OXR1,APP	Ex_3/4_down
												GO:BP	cell cycle	GO:0007049	0.0070759	2.15022	1882	53	14	18017	HSP90AA1,STMN1,CALM1,CALM3,PLCB1,DYNLL1,HSP90AB1,PPP3CA,SEPT7,ACTB,PRNP,CLASP2,TUBA1B,APP	Ex_3/4_down
												GO:BP	regulation of supramolecular fiber organization	GO:1902903	0.00711819	2.14763	380	53	6	18017	STMN1,TMSB4X,TMSB10,MAP1B,CLASP2,APP	Ex_3/4_down
												GO:BP	dendrite development	GO:0016358	0.00711819	2.14763	251	53	5	18017	MAP1B,YWHAH,PPP3CA,PPFIA2,APP	Ex_3/4_down
												GO:BP	calcium ion transmembrane import into cytosol	GO:0097553	0.0071287	2.14699	144	53	4	18017	CALM1,CALM3,THY1,PRNP	Ex_3/4_down
												GO:BP	protein localization to mitochondrion	GO:0070585	0.0072829	2.1377	145	53	4	18017	HSP90AA1,CALM1,CALM3,YWHAH	Ex_3/4_down
												GO:BP	negative regulation of release of sequestered calcium ion into cytosol	GO:0051280	0.0072829	2.1377	15	53	2	18017	CALM1,CALM3	Ex_3/4_down
												GO:BP	positive regulation of multicellular organismal process	GO:0051240	0.00738278	2.13178	1894	53	14	18017	CCK,RTN4,TMSB4X,ENC1,MAP1B,PLCB1,PPP3CA,NEFL,NTRK2,PKM,CHRM3,CLASP2,NEGR1,APP	Ex_3/4_down
												GO:BP	mitotic cell cycle	GO:0000278	0.00740163	2.13067	1056	53	10	18017	HSP90AA1,STMN1,CALM1,CALM3,PLCB1,DYNLL1,PPP3CA,CLASP2,TUBA1B,APP	Ex_3/4_down
												GO:BP	protein localization	GO:0008104	0.00748524	2.12579	2856	53	18	18017	RTN4,HSP90AA1,TMSB4X,TMSB10,CALM1,CALM3,SNAP25,DYNLL1,VSNL1,YWHAH,HSP90AB1,PPP3CA,THY1,SEPT7,ACTB,PRNP,CLASP2,PSAP	Ex_3/4_down
												GO:BP	regulation of anatomical structure size	GO:0090066	0.00748524	2.12579	533	53	7	18017	RTN4,TMSB4X,TMSB10,MAP1B,HSP90AB1,NEFL,CHRM3	Ex_3/4_down
												GO:BP	protein-containing complex assembly	GO:0065003	0.00749033	2.1255	1677	53	13	18017	CCK,RTN4,HSP90AA1,STMN1,TMSB4X,TMSB10,MAP1B,SNAP25,HSP90AB1,NEFL,KCND2,PRNP,CLASP2	Ex_3/4_down
												GO:BP	regulation of monooxygenase activity	GO:0032768	0.00757247	2.12076	65	53	3	18017	HSP90AA1,CALM1,CALM3	Ex_3/4_down
												GO:BP	regulation of peptidyl-serine phosphorylation	GO:0033135	0.0076326	2.11733	148	53	4	18017	HSP90AA1,HSP90AB1,NTRK2,APP	Ex_3/4_down
												GO:BP	regulation of regulated secretory pathway	GO:1903305	0.0076326	2.11733	148	53	4	18017	CALM1,CALM3,PPFIA2,NRXN3	Ex_3/4_down
												GO:BP	leukocyte degranulation	GO:0043299	0.00766876	2.11527	537	53	7	18017	HSP90AA1,FTH1,SNAP25,DYNLL1,HSP90AB1,PKM,PSAP	Ex_3/4_down
												GO:BP	positive regulation of intracellular signal transduction	GO:1902533	0.00775087	2.11065	1067	53	10	18017	RTN4,HSP90AA1,CALM1,CALM3,PLCB1,HSP90AB1,SIK3,NTRK2,PSAP,APP	Ex_3/4_down
												GO:BP	mitochondrial membrane organization	GO:0007006	0.00775087	2.11065	149	53	4	18017	HSP90AA1,CALM1,CALM3,YWHAH	Ex_3/4_down
												GO:BP	regulation of cellular component size	GO:0032535	0.00775087	2.11065	390	53	6	18017	RTN4,TMSB4X,TMSB10,MAP1B,HSP90AB1,NEFL	Ex_3/4_down
												GO:BP	signal transduction	GO:0007165	0.00791662	2.10146	6291	53	30	18017	CCK,NRGN,RTN4,HSP90AA1,STMN1,TMSB4X,CHN1,PEBP1,CALM1,CALM3,PLCB1,YWHAH,GRIA4,HSP90AB1,SIK3,PPP3CA,NEFL,GRM7,NTRK2,THY1,DGKB,CHRM3,ACTB,NRXN3,PRNP,TENM2,ATRNL1,GRIA2,PSAP,APP	Ex_3/4_down
												GO:BP	negative regulation of dendrite morphogenesis	GO:0050774	0.00791662	2.10146	16	53	2	18017	YWHAH,PPP3CA	Ex_3/4_down
												GO:BP	regulation of high voltage-gated calcium channel activity	GO:1901841	0.00791662	2.10146	16	53	2	18017	CALM1,CALM3	Ex_3/4_down
												GO:BP	positive regulation of cation transmembrane transport	GO:1904064	0.00801085	2.09632	151	53	4	18017	TMSB4X,CALM1,CALM3,THY1	Ex_3/4_down
												GO:BP	regulation of vesicle-mediated transport	GO:0060627	0.00814273	2.08923	545	53	7	18017	CALM1,CALM3,VSNL1,PPP3CA,PPFIA2,NRXN3,CLASP2	Ex_3/4_down
												GO:BP	negative regulation of cellular process	GO:0048523	0.00818133	2.08718	5086	53	26	18017	RTN4,STMN1,TMSB4X,PEBP1,TMSB10,ENC1,CALM1,CALM3,MAP1B,PLCB1,FTH1,DYNLL1,VSNL1,YWHAH,HSP90AB1,PPP3CA,NEFL,GRM7,NTRK2,THY1,PRNP,TENM2,CLASP2,PSAP,OXR1,APP	Ex_3/4_down
												GO:BP	regulation of protein modification process	GO:0031399	0.0082501	2.08354	1927	53	14	18017	CCK,HSP90AA1,PEBP1,CALM1,CALM3,PLCB1,HSP90AB1,NTRK2,THY1,ACTB,PRNP,PSAP,OXR1,APP	Ex_3/4_down
												GO:BP	myeloid cell activation involved in immune response	GO:0002275	0.00832607	2.07956	548	53	7	18017	HSP90AA1,FTH1,SNAP25,DYNLL1,HSP90AB1,PKM,PSAP	Ex_3/4_down
												GO:BP	regulation of peptidyl-tyrosine phosphorylation	GO:0050730	0.00849295	2.07094	266	53	5	18017	CCK,NTRK2,THY1,PRNP,APP	Ex_3/4_down
												GO:BP	cell activation involved in immune response	GO:0002263	0.00857789	2.06662	719	53	8	18017	HSP90AA1,FTH1,SNAP25,DYNLL1,HSP90AB1,PKM,PSAP,APP	Ex_3/4_down
												GO:BP	copper ion homeostasis	GO:0055070	0.00857789	2.06662	17	53	2	18017	PRNP,APP	Ex_3/4_down
												GO:BP	negative regulation of amyloid precursor protein catabolic process	GO:1902992	0.00857789	2.06662	17	53	2	18017	NTRK2,PRNP	Ex_3/4_down
												GO:BP	positive regulation of sequestering of calcium ion	GO:0051284	0.00857789	2.06662	17	53	2	18017	CALM1,CALM3	Ex_3/4_down
												GO:BP	postsynapse organization	GO:0099173	0.00857789	2.06662	155	53	4	18017	NEFL,PPFIA2,ACTB,PRNP	Ex_3/4_down
												GO:BP	regulation of synaptic vesicle endocytosis	GO:1900242	0.00857789	2.06662	17	53	2	18017	CALM1,CALM3	Ex_3/4_down
												GO:BP	regulation of glutamate secretion	GO:0014048	0.00857789	2.06662	17	53	2	18017	CCK,GRM7	Ex_3/4_down
												GO:BP	myeloid leukocyte mediated immunity	GO:0002444	0.00864073	2.06345	555	53	7	18017	HSP90AA1,FTH1,SNAP25,DYNLL1,HSP90AB1,PKM,PSAP	Ex_3/4_down
												GO:BP	negative regulation of neuron projection development	GO:0010977	0.00864073	2.06345	156	53	4	18017	RTN4,YWHAH,PPP3CA,THY1	Ex_3/4_down
												GO:BP	amyloid precursor protein metabolic process	GO:0042982	0.00864073	2.06345	70	53	3	18017	NTRK2,PRNP,APP	Ex_3/4_down
												GO:BP	telencephalon development	GO:0021537	0.00864073	2.06345	269	53	5	18017	NRGN,RTN4,PLCB1,NEFL,NTRK2	Ex_3/4_down
												GO:BP	neural retina development	GO:0003407	0.00897567	2.04693	71	53	3	18017	NTRK2,THY1,GPM6A	Ex_3/4_down
												GO:BP	supramolecular fiber organization	GO:0097435	0.00897687	2.04688	727	53	8	18017	STMN1,TMSB4X,TMSB10,MAP1B,HSP90AB1,NEFL,CLASP2,APP	Ex_3/4_down
												GO:BP	cellular response to nitrogen compound	GO:1901699	0.00897687	2.04688	727	53	8	18017	MAP1B,PLCB1,NTRK2,PKM,CHRM3,ACTB,PRNP,APP	Ex_3/4_down
												GO:BP	mitotic cell cycle process	GO:1903047	0.00901688	2.04494	908	53	9	18017	HSP90AA1,STMN1,CALM1,CALM3,PLCB1,DYNLL1,PPP3CA,CLASP2,APP	Ex_3/4_down
												GO:BP	forebrain development	GO:0030900	0.00902633	2.04449	408	53	6	18017	NRGN,RTN4,PLCB1,NEFL,NTRK2,APP	Ex_3/4_down
												GO:BP	negative regulation of neuron apoptotic process	GO:0043524	0.0090271	2.04445	159	53	4	18017	HSP90AB1,NEFL,NTRK2,OXR1	Ex_3/4_down
												GO:BP	regulation of calcium ion transmembrane transport	GO:1903169	0.0090271	2.04445	159	53	4	18017	CALM1,CALM3,THY1,PRNP	Ex_3/4_down
												GO:BP	positive regulation of calcium ion transmembrane transport	GO:1904427	0.00915007	2.03858	72	53	3	18017	CALM1,CALM3,THY1	Ex_3/4_down
												GO:BP	cellular protein-containing complex assembly	GO:0034622	0.00917426	2.03743	1104	53	10	18017	RTN4,HSP90AA1,STMN1,TMSB4X,TMSB10,MAP1B,SNAP25,HSP90AB1,NEFL,CLASP2	Ex_3/4_down
												GO:BP	endoplasmic reticulum tubular network organization	GO:0071786	0.00922943	2.03483	18	53	2	18017	RTN4,RTN3	Ex_3/4_down
												GO:BP	animal organ development	GO:0048513	0.00933875	2.02971	3731	53	21	18017	NRGN,RTN4,STMN1,CALM1,CALM3,CKB,PLCB1,DYNLL1,YWHAH,HSP90AB1,PPP3CA,NEFL,NTRK2,THY1,PKM,GPM6A,ACTB,ATRNL1,CLASP2,PSAP,APP	Ex_3/4_down
												GO:BP	regulation of kinase activity	GO:0043549	0.00964831	2.01555	920	53	9	18017	HSP90AA1,CALM1,CALM3,HSP90AB1,NTRK2,THY1,ACTB,PRNP,APP	Ex_3/4_down
												GO:BP	positive regulation of phosphorylation	GO:0042327	0.009661	2.01498	1114	53	10	18017	CCK,HSP90AA1,CALM1,CALM3,PLCB1,HSP90AB1,NTRK2,PRNP,PSAP,APP	Ex_3/4_down
												GO:BP	calcium ion transport into cytosol	GO:0060402	0.009661	2.01498	163	53	4	18017	CALM1,CALM3,THY1,PRNP	Ex_3/4_down
												GO:BP	transport along microtubule	GO:0010970	0.009661	2.01498	163	53	4	18017	MAP1B,DYNLL1,NEFL,APP	Ex_3/4_down
												GO:BP	regulation of signaling receptor activity	GO:0010469	0.00985217	2.00647	164	53	4	18017	GRIA4,NEFL,GRIA2,APP	Ex_3/4_down
												GO:BP	establishment of protein localization to organelle	GO:0072594	0.00986073	2.00609	573	53	7	18017	HSP90AA1,CALM1,CALM3,SNAP25,YWHAH,HSP90AB1,PPP3CA	Ex_3/4_down
												GO:BP	positive regulation of ion transmembrane transport	GO:0034767	0.0100164	1.99929	165	53	4	18017	TMSB4X,CALM1,CALM3,THY1	Ex_3/4_down
												GO:BP	G protein-coupled acetylcholine receptor signaling pathway	GO:0007213	0.0100265	1.99885	19	53	2	18017	PLCB1,CHRM3	Ex_3/4_down
												GO:BP	microtubule polymerization	GO:0046785	0.0102947	1.98738	76	53	3	18017	STMN1,MAP1B,CLASP2	Ex_3/4_down
												GO:BP	positive regulation of cation channel activity	GO:2001259	0.0102947	1.98738	76	53	3	18017	TMSB4X,CALM1,CALM3	Ex_3/4_down
												GO:BP	organelle organization	GO:0006996	0.0103307	1.98587	4044	53	22	18017	CCK,RTN4,HSP90AA1,STMN1,TMSB4X,TMSB10,CALM1,CALM3,MAP1B,PLCB1,SNAP25,DYNLL1,YWHAH,HSP90AB1,SIK3,NEFL,RTN3,THY1,SEPT7,ACTB,CLASP2,TUBA1B	Ex_3/4_down
												GO:BP	leukocyte activation	GO:0045321	0.0105363	1.97731	1335	53	11	18017	HSP90AA1,FTH1,SNAP25,DYNLL1,HSP90AB1,PPP3CA,THY1,PKM,PRNP,PSAP,APP	Ex_3/4_down
												GO:BP	biological regulation	GO:0065007	0.0105363	1.97731	12697	53	47	18017	CCK,NRGN,RTN4,HSP90AA1,STMN1,TMSB4X,CHN1,PEBP1,TMSB10,ENC1,CALM1,CALM3,CKB,MAP1B,PLCB1,FTH1,SNAP25,DYNLL1,VSNL1,YWHAH,GRIA4,HSP90AB1,SIK3,PPP3CA,NEFL,GRM7,NTRK2,KCND2,THY1,DGKB,SEPT7,PKM,PPFIA2,GPM6A,CHRM3,ACTB,NRXN3,PRNP,TENM2,ATRNL1,CLASP2,NEGR1,GRIA2,KCNQ5,PSAP,OXR1,APP	Ex_3/4_down
												GO:BP	neuron migration	GO:0001764	0.0107195	1.96983	169	53	4	18017	CCK,MAP1B,NTRK2,GPM6A	Ex_3/4_down
												GO:BP	negative regulation of calcium ion transport into cytosol	GO:0010523	0.0108978	1.96266	20	53	2	18017	CALM1,CALM3	Ex_3/4_down
												GO:BP	cellular response to drug	GO:0035690	0.0109055	1.96236	78	53	3	18017	HSP90AB1,PPP3CA,PRNP	Ex_3/4_down
												GO:BP	positive regulation of ion transport	GO:0043270	0.0112182	1.95008	291	53	5	18017	CCK,TMSB4X,CALM1,CALM3,THY1	Ex_3/4_down
												GO:BP	transmembrane receptor protein tyrosine kinase signaling pathway	GO:0007169	0.0112182	1.95008	762	53	8	18017	RTN4,HSP90AA1,STMN1,CHN1,PLCB1,NTRK2,ACTB,APP	Ex_3/4_down
												GO:BP	negative regulation of binding	GO:0051100	0.011273	1.94796	172	53	4	18017	STMN1,TMSB4X,PPP3CA,ACTB	Ex_3/4_down
												GO:BP	negative regulation of protein polymerization	GO:0032272	0.0115972	1.93565	80	53	3	18017	STMN1,TMSB4X,TMSB10	Ex_3/4_down
												GO:BP	neuron projection extension	GO:1990138	0.0116945	1.93202	174	53	4	18017	RTN4,HSP90AA1,MAP1B,HSP90AB1	Ex_3/4_down
												GO:BP	negative regulation of peptidyl-threonine phosphorylation	GO:0010801	0.0117217	1.93101	21	53	2	18017	CALM1,CALM3	Ex_3/4_down
												GO:BP	G protein-coupled receptor signaling pathway	GO:0007186	0.0117217	1.93101	1358	53	11	18017	CCK,STMN1,CALM1,CALM3,PLCB1,GRM7,DGKB,CHRM3,ATRNL1,PSAP,APP	Ex_3/4_down
												GO:BP	chaperone-mediated protein complex assembly	GO:0051131	0.0117217	1.93101	21	53	2	18017	HSP90AA1,HSP90AB1	Ex_3/4_down
												GO:BP	calcium ion transport	GO:0006816	0.0117764	1.92899	438	53	6	18017	CALM1,CALM3,PPP3CA,THY1,GPM6A,PRNP	Ex_3/4_down
												GO:BP	positive regulation of neuron projection development	GO:0010976	0.0117764	1.92899	296	53	5	18017	ENC1,MAP1B,NEFL,NTRK2,NEGR1	Ex_3/4_down
												GO:BP	cytokinesis	GO:0000910	0.0117764	1.92899	175	53	4	18017	STMN1,CALM1,CALM3,SEPT7	Ex_3/4_down
												GO:BP	positive regulation of nitric-oxide synthase activity	GO:0051000	0.0127282	1.89523	22	53	2	18017	CALM1,CALM3	Ex_3/4_down
												GO:BP	pallium development	GO:0021543	0.0129366	1.88818	180	53	4	18017	RTN4,PLCB1,NEFL,NTRK2	Ex_3/4_down
												GO:BP	negative regulation of neurogenesis	GO:0050768	0.0129366	1.88818	303	53	5	18017	RTN4,YWHAH,PPP3CA,THY1,APP	Ex_3/4_down
												GO:BP	regulation of membrane potential	GO:0042391	0.0131992	1.87945	449	53	6	18017	CCK,YWHAH,PPP3CA,NTRK2,KCND2,APP	Ex_3/4_down
												GO:BP	positive regulation of cellular component movement	GO:0051272	0.0132191	1.8788	611	53	7	18017	RTN4,STMN1,TMSB4X,PPP3CA,THY1,CLASP2,APP	Ex_3/4_down
												GO:BP	regulation of release of sequestered calcium ion into cytosol	GO:0051279	0.0132736	1.87701	85	53	3	18017	CALM1,CALM3,THY1	Ex_3/4_down
												GO:BP	central nervous system neuron development	GO:0021954	0.0132736	1.87701	85	53	3	18017	HSP90AA1,HSP90AB1,NTRK2	Ex_3/4_down
												GO:BP	response to organic cyclic compound	GO:0014070	0.0132736	1.87701	977	53	9	18017	CALM1,CALM3,MAP1B,YWHAH,HSP90AB1,NEFL,CHRM3,ACTB,APP	Ex_3/4_down
												GO:BP	cytosolic calcium ion transport	GO:0060401	0.0134902	1.86998	183	53	4	18017	CALM1,CALM3,THY1,PRNP	Ex_3/4_down
												GO:BP	positive regulation of long-term synaptic potentiation	GO:1900273	0.0135785	1.86715	23	53	2	18017	NRGN,APP	Ex_3/4_down
												GO:BP	regulation of microtubule polymerization or depolymerization	GO:0031110	0.0135809	1.86707	86	53	3	18017	STMN1,MAP1B,CLASP2	Ex_3/4_down
												GO:BP	regulation of protein-containing complex assembly	GO:0043254	0.0137985	1.86017	455	53	6	18017	CCK,HSP90AA1,STMN1,TMSB4X,TMSB10,MAP1B	Ex_3/4_down
												GO:BP	signal release	GO:0023061	0.0137985	1.86017	618	53	7	18017	CALM1,CALM3,SNAP25,VSNL1,PPP3CA,PPFIA2,NRXN3	Ex_3/4_down
												GO:BP	adenylate cyclase-inhibiting G protein-coupled receptor signaling pathway	GO:0007193	0.0139252	1.8562	87	53	3	18017	GRM7,CHRM3,PSAP	Ex_3/4_down
												GO:BP	positive regulation of axonogenesis	GO:0050772	0.0143488	1.84318	88	53	3	18017	MAP1B,NEFL,NTRK2	Ex_3/4_down
												GO:BP	establishment of mitochondrion localization, microtubule-mediated	GO:0034643	0.0143991	1.84167	24	53	2	18017	MAP1B,NEFL	Ex_3/4_down
												GO:BP	regulation of cardiac muscle contraction by regulation of the release of sequestered calcium ion	GO:0010881	0.0143991	1.84167	24	53	2	18017	CALM1,CALM3	Ex_3/4_down
												GO:BP	negative regulation of T cell receptor signaling pathway	GO:0050860	0.0143991	1.84167	24	53	2	18017	THY1,PRNP	Ex_3/4_down
												GO:BP	regulation of system process	GO:0044057	0.0143991	1.84167	624	53	7	18017	CCK,CALM1,CALM3,PPP3CA,KCND2,CHRM3,APP	Ex_3/4_down
												GO:BP	mitochondrion transport along microtubule	GO:0047497	0.0143991	1.84167	24	53	2	18017	MAP1B,NEFL	Ex_3/4_down
												GO:BP	negative regulation of molecular function	GO:0044092	0.0151342	1.82004	1203	53	10	18017	STMN1,TMSB4X,PEBP1,CALM1,CALM3,PPP3CA,THY1,ACTB,PRNP,APP	Ex_3/4_down
												GO:BP	growth	GO:0040007	0.0153992	1.8125	1004	53	9	18017	RTN4,HSP90AA1,MAP1B,PLCB1,HSP90AB1,PPP3CA,PKM,PSAP,APP	Ex_3/4_down
												GO:BP	regulation of synaptic vesicle recycling	GO:1903421	0.0154204	1.8119	25	53	2	18017	CALM1,CALM3	Ex_3/4_down
												GO:BP	neuron projection organization	GO:0106027	0.0154204	1.8119	91	53	3	18017	PPFIA2,PRNP,APP	Ex_3/4_down
												GO:BP	cell communication by electrical coupling involved in cardiac conduction	GO:0086064	0.0154204	1.8119	25	53	2	18017	CALM1,CALM3	Ex_3/4_down
												GO:BP	calcium ion transmembrane transport	GO:0070588	0.0154297	1.81164	320	53	5	18017	CALM1,CALM3,THY1,GPM6A,PRNP	Ex_3/4_down
												GO:BP	regulation of protein localization	GO:0032880	0.0157923	1.80155	1010	53	9	18017	RTN4,HSP90AA1,SNAP25,VSNL1,YWHAH,HSP90AB1,PPP3CA,ACTB,PRNP	Ex_3/4_down
												GO:BP	negative regulation of protein metabolic process	GO:0051248	0.0157923	1.80155	1213	53	10	18017	PEBP1,ENC1,CALM1,CALM3,HSP90AB1,NTRK2,THY1,PRNP,OXR1,APP	Ex_3/4_down
												GO:BP	microtubule-based transport	GO:0099111	0.0158192	1.80082	194	53	4	18017	MAP1B,DYNLL1,NEFL,APP	Ex_3/4_down
												GO:BP	regulation of ryanodine-sensitive calcium-release channel activity	GO:0060314	0.0164202	1.78462	26	53	2	18017	CALM1,CALM3	Ex_3/4_down
												GO:BP	camera-type eye photoreceptor cell differentiation	GO:0060219	0.0164202	1.78462	26	53	2	18017	NTRK2,THY1	Ex_3/4_down
												GO:BP	regulation of cell junction assembly	GO:1901888	0.0165931	1.78007	197	53	4	18017	NTRK2,THY1,CLASP2,APP	Ex_3/4_down
												GO:BP	response to chemical	GO:0042221	0.016733	1.77643	4808	53	24	18017	CCK,HSP90AA1,TMSB4X,CHN1,CALM1,CALM3,MAP1B,PLCB1,VSNL1,YWHAH,HSP90AB1,PPP3CA,NEFL,NTRK2,KCND2,PKM,CHRM3,ACTB,NRXN3,PRNP,TUBA1B,PSAP,OXR1,APP	Ex_3/4_down
												GO:BP	negative regulation of nervous system development	GO:0051961	0.0168191	1.7742	328	53	5	18017	RTN4,YWHAH,PPP3CA,THY1,APP	Ex_3/4_down
												GO:BP	regulation of dendrite morphogenesis	GO:0048814	0.0169426	1.77102	95	53	3	18017	YWHAH,PPP3CA,PPFIA2	Ex_3/4_down
												GO:BP	negative regulation of biological process	GO:0048519	0.0169786	1.7701	5719	53	27	18017	CCK,RTN4,STMN1,TMSB4X,PEBP1,TMSB10,ENC1,CALM1,CALM3,MAP1B,PLCB1,FTH1,DYNLL1,VSNL1,YWHAH,HSP90AB1,PPP3CA,NEFL,GRM7,NTRK2,THY1,PRNP,TENM2,CLASP2,PSAP,OXR1,APP	Ex_3/4_down
												GO:BP	positive regulation of CD24 production	GO:2000560	0.0169786	1.7701	1	53	1	18017	PLCB1	Ex_3/4_down
												GO:BP	central nervous system neuron differentiation	GO:0021953	0.0169786	1.7701	202	53	4	18017	HSP90AA1,HSP90AB1,NTRK2,PSAP	Ex_3/4_down
												GO:BP	activation of meiosis involved in egg activation	GO:0060466	0.0169786	1.7701	1	53	1	18017	PLCB1	Ex_3/4_down
												GO:BP	glucocorticoid catabolic process	GO:0006713	0.0169786	1.7701	1	53	1	18017	YWHAH	Ex_3/4_down
												GO:BP	CD24 biosynthetic process	GO:0035724	0.0169786	1.7701	1	53	1	18017	PLCB1	Ex_3/4_down
												GO:BP	regulation of transferase activity	GO:0051338	0.0169786	1.7701	1029	53	9	18017	HSP90AA1,CALM1,CALM3,HSP90AB1,NTRK2,THY1,ACTB,PRNP,APP	Ex_3/4_down
												GO:BP	cellular response to copper ion	GO:0071280	0.0169786	1.7701	27	53	2	18017	PRNP,APP	Ex_3/4_down
												GO:BP	divalent metal ion transport	GO:0070838	0.0169786	1.7701	483	53	6	18017	CALM1,CALM3,PPP3CA,THY1,GPM6A,PRNP	Ex_3/4_down
												GO:BP	regulation of neuron death	GO:1901214	0.0169786	1.7701	331	53	5	18017	HSP90AB1,NEFL,NTRK2,PRNP,OXR1	Ex_3/4_down
												GO:BP	response to cytochalasin B	GO:1901328	0.0169786	1.7701	1	53	1	18017	ACTB	Ex_3/4_down
												GO:BP	negative regulation of transforming growth factor beta activation	GO:1901389	0.0169786	1.7701	1	53	1	18017	HSP90AB1	Ex_3/4_down
												GO:BP	ion homeostasis	GO:0050801	0.0169786	1.7701	837	53	8	18017	CCK,CALM1,CALM3,CKB,FTH1,THY1,PRNP,APP	Ex_3/4_down
												GO:BP	negative regulation of fear response	GO:1903366	0.0169786	1.7701	1	53	1	18017	CCK	Ex_3/4_down
												GO:BP	regulation of CD24 production	GO:2000559	0.0169786	1.7701	1	53	1	18017	PLCB1	Ex_3/4_down
												GO:BP	negative regulation of behavioral fear response	GO:2000986	0.0169786	1.7701	1	53	1	18017	CCK	Ex_3/4_down
												GO:BP	positive regulation of ERBB3 signaling pathway	GO:1905580	0.0169786	1.7701	1	53	1	18017	RTN4	Ex_3/4_down
												GO:BP	induction of synaptic plasticity by chemical substance	GO:0051915	0.0169786	1.7701	1	53	1	18017	MAP1B	Ex_3/4_down
												GO:BP	cellular response to cytochalasin B	GO:0072749	0.0169786	1.7701	1	53	1	18017	ACTB	Ex_3/4_down
												GO:BP	positive regulation of synaptic plasticity by chemical substance	GO:0051914	0.0169786	1.7701	1	53	1	18017	MAP1B	Ex_3/4_down
												GO:BP	regulation of synaptic plasticity by chemical substance	GO:0051913	0.0169786	1.7701	1	53	1	18017	MAP1B	Ex_3/4_down
												GO:BP	establishment of mitochondrion localization	GO:0051654	0.0169786	1.7701	27	53	2	18017	MAP1B,NEFL	Ex_3/4_down
												GO:BP	positive regulation of norepinephrine uptake	GO:0051623	0.0169786	1.7701	1	53	1	18017	ACTB	Ex_3/4_down
												GO:BP	negative regulation of monocyte extravasation	GO:2000438	0.0169786	1.7701	1	53	1	18017	PLCB1	Ex_3/4_down
												GO:BP	positive regulation of protein autophosphorylation	GO:0031954	0.0169786	1.7701	27	53	2	18017	CALM1,CALM3	Ex_3/4_down
												GO:BP	regulation of ERBB3 signaling pathway	GO:1905578	0.0169786	1.7701	1	53	1	18017	RTN4	Ex_3/4_down
												GO:BP	ganglioside GM1 transport to membrane	GO:1905572	0.0169786	1.7701	1	53	1	18017	PSAP	Ex_3/4_down
												GO:BP	negative regulation of phosphorylation	GO:0042326	0.0172256	1.76382	488	53	6	18017	PEBP1,CALM1,CALM3,DYNLL1,THY1,PRNP	Ex_3/4_down
												GO:BP	response to organic substance	GO:0010033	0.0172278	1.76377	3433	53	19	18017	HSP90AA1,TMSB4X,CALM1,CALM3,MAP1B,PLCB1,VSNL1,YWHAH,HSP90AB1,PPP3CA,NEFL,NTRK2,PKM,CHRM3,ACTB,PRNP,TUBA1B,PSAP,APP	Ex_3/4_down
												GO:BP	organelle localization	GO:0051640	0.0172278	1.76377	658	53	7	18017	HSP90AA1,MAP1B,SNAP25,DYNLL1,NEFL,PPFIA2,CLASP2	Ex_3/4_down
												GO:BP	protein kinase C-activating G protein-coupled receptor signaling pathway	GO:0007205	0.0173526	1.76063	28	53	2	18017	CCK,DGKB	Ex_3/4_down
												GO:BP	negative regulation of dendrite development	GO:2000171	0.0173526	1.76063	28	53	2	18017	YWHAH,PPP3CA	Ex_3/4_down
												GO:BP	divalent inorganic cation transport	GO:0072511	0.0173526	1.76063	490	53	6	18017	CALM1,CALM3,PPP3CA,THY1,GPM6A,PRNP	Ex_3/4_down
												GO:BP	negative regulation of microtubule depolymerization	GO:0007026	0.0173526	1.76063	28	53	2	18017	MAP1B,CLASP2	Ex_3/4_down
												GO:BP	multicellular organismal signaling	GO:0035637	0.0177744	1.7502	206	53	4	18017	CALM1,CALM3,NTRK2,KCND2	Ex_3/4_down
												GO:BP	response to endogenous stimulus	GO:0009719	0.0182273	1.73928	1696	53	12	18017	CALM1,CALM3,MAP1B,YWHAH,HSP90AB1,NEFL,NTRK2,PKM,CHRM3,ACTB,PRNP,APP	Ex_3/4_down
												GO:BP	regulation of cardiac muscle contraction by calcium ion signaling	GO:0010882	0.0184323	1.73442	29	53	2	18017	CALM1,CALM3	Ex_3/4_down
												GO:BP	acetylcholine receptor signaling pathway	GO:0095500	0.0184323	1.73442	29	53	2	18017	PLCB1,CHRM3	Ex_3/4_down
												GO:BP	cellular response to organonitrogen compound	GO:0071417	0.0189537	1.72231	672	53	7	18017	MAP1B,NTRK2,PKM,CHRM3,ACTB,PRNP,APP	Ex_3/4_down
												GO:BP	positive regulation of protein modification process	GO:0031401	0.0191142	1.71864	1265	53	10	18017	CCK,HSP90AA1,CALM1,CALM3,PLCB1,HSP90AB1,NTRK2,PRNP,PSAP,APP	Ex_3/4_down
												GO:BP	regulation of protein binding	GO:0043393	0.0194284	1.71156	212	53	4	18017	STMN1,HSP90AB1,ACTB,APP	Ex_3/4_down
												GO:BP	positive regulation of filopodium assembly	GO:0051491	0.0195327	1.70924	30	53	2	18017	GPM6A,TENM2	Ex_3/4_down
												GO:BP	anion transport	GO:0006820	0.0195656	1.70851	677	53	7	18017	CCK,SNAP25,GRM7,NTRK2,PPFIA2,PRNP,PSAP	Ex_3/4_down
												GO:BP	positive regulation of plasma membrane bounded cell projection assembly	GO:0120034	0.0196575	1.70647	104	53	3	18017	SEPT7,GPM6A,TENM2	Ex_3/4_down
												GO:BP	regulation of calcium-mediated signaling	GO:0050848	0.0196575	1.70647	104	53	3	18017	CALM1,CALM3,PRNP	Ex_3/4_down
												GO:BP	negative regulation of cell development	GO:0010721	0.0201009	1.69678	351	53	5	18017	RTN4,YWHAH,PPP3CA,THY1,APP	Ex_3/4_down
												GO:BP	protein-containing complex subunit organization	GO:0043933	0.0203774	1.69085	1960	53	13	18017	CCK,RTN4,HSP90AA1,STMN1,TMSB4X,TMSB10,MAP1B,SNAP25,HSP90AB1,NEFL,KCND2,PRNP,CLASP2	Ex_3/4_down
												GO:BP	negative regulation of stress fiber assembly	GO:0051497	0.0203774	1.69085	31	53	2	18017	STMN1,CLASP2	Ex_3/4_down
												GO:BP	cellular response to acetylcholine	GO:1905145	0.0203774	1.69085	31	53	2	18017	PLCB1,CHRM3	Ex_3/4_down
												GO:BP	response to acetylcholine	GO:1905144	0.0203774	1.69085	31	53	2	18017	PLCB1,CHRM3	Ex_3/4_down
												GO:BP	positive regulation of monooxygenase activity	GO:0032770	0.0203774	1.69085	31	53	2	18017	CALM1,CALM3	Ex_3/4_down
												GO:BP	positive regulation of transmembrane transport	GO:0034764	0.0203774	1.69085	216	53	4	18017	TMSB4X,CALM1,CALM3,THY1	Ex_3/4_down
												GO:BP	cellular ion homeostasis	GO:0006873	0.0209043	1.67976	688	53	7	18017	CALM1,CALM3,CKB,FTH1,THY1,PRNP,APP	Ex_3/4_down
												GO:BP	cell communication by electrical coupling	GO:0010644	0.0214097	1.66939	32	53	2	18017	CALM1,CALM3	Ex_3/4_down
												GO:BP	negative regulation of antigen receptor-mediated signaling pathway	GO:0050858	0.0214097	1.66939	32	53	2	18017	THY1,PRNP	Ex_3/4_down
												GO:BP	regulation of release of sequestered calcium ion into cytosol by sarcoplasmic reticulum	GO:0010880	0.0214097	1.66939	32	53	2	18017	CALM1,CALM3	Ex_3/4_down
												GO:BP	regulation of microtubule depolymerization	GO:0031114	0.0214097	1.66939	32	53	2	18017	MAP1B,CLASP2	Ex_3/4_down
												GO:BP	macromolecule localization	GO:0033036	0.0214097	1.66939	3246	53	18	18017	RTN4,HSP90AA1,TMSB4X,TMSB10,CALM1,CALM3,SNAP25,DYNLL1,VSNL1,YWHAH,HSP90AB1,PPP3CA,THY1,SEPT7,ACTB,PRNP,CLASP2,PSAP	Ex_3/4_down
												GO:BP	negative regulation of transport	GO:0051051	0.0215186	1.66719	518	53	6	18017	CALM1,CALM3,MAP1B,VSNL1,PPP3CA,GRM7	Ex_3/4_down
												GO:BP	negative regulation of neuron death	GO:1901215	0.0215573	1.66641	221	53	4	18017	HSP90AB1,NEFL,NTRK2,OXR1	Ex_3/4_down
												GO:BP	cell surface receptor signaling pathway	GO:0007166	0.0215573	1.66641	3250	53	18	18017	RTN4,HSP90AA1,STMN1,TMSB4X,CHN1,CALM1,PLCB1,GRIA4,HSP90AB1,PPP3CA,NEFL,GRM7,NTRK2,THY1,ACTB,PRNP,GRIA2,APP	Ex_3/4_down
												GO:BP	positive regulation of ion transmembrane transporter activity	GO:0032414	0.0216002	1.66554	109	53	3	18017	TMSB4X,CALM1,CALM3	Ex_3/4_down
												GO:BP	potassium ion transmembrane transport	GO:0071805	0.0221512	1.6546	223	53	4	18017	SNAP25,KCND2,PRNP,KCNQ5	Ex_3/4_down
												GO:BP	walking behavior	GO:0090659	0.022356	1.65061	33	53	2	18017	PSAP,OXR1	Ex_3/4_down
												GO:BP	cellular response to interleukin-4	GO:0071353	0.022356	1.65061	33	53	2	18017	HSP90AB1,TUBA1B	Ex_3/4_down
												GO:BP	regulation of cellular extravasation	GO:0002691	0.022356	1.65061	33	53	2	18017	PLCB1,THY1	Ex_3/4_down
												GO:BP	neuromuscular process	GO:0050905	0.0230556	1.63722	112	53	3	18017	NEFL,PSAP,APP	Ex_3/4_down
												GO:BP	intracellular transport	GO:0046907	0.0230894	1.63659	1761	53	12	18017	HSP90AA1,MAP1B,DYNLL1,YWHAH,HSP90AB1,PPP3CA,NEFL,PPFIA2,PRNP,TUBA1B,PSAP,APP	Ex_3/4_down
												GO:BP	peptidyl-amino acid modification	GO:0018193	0.0233844	1.63107	1313	53	10	18017	CCK,HSP90AA1,CALM1,CALM3,HSP90AB1,NTRK2,THY1,PRNP,OXR1,APP	Ex_3/4_down
												GO:BP	eye photoreceptor cell development	GO:0042462	0.023406	1.63067	34	53	2	18017	NTRK2,THY1	Ex_3/4_down
												GO:BP	negative regulation of actin filament bundle assembly	GO:0032232	0.023406	1.63067	34	53	2	18017	STMN1,CLASP2	Ex_3/4_down
												GO:BP	postsynaptic signal transduction	GO:0098926	0.023406	1.63067	34	53	2	18017	PLCB1,CHRM3	Ex_3/4_down
												GO:BP	enzyme linked receptor protein signaling pathway	GO:0007167	0.0234145	1.63051	1102	53	9	18017	RTN4,HSP90AA1,STMN1,CHN1,PLCB1,HSP90AB1,NTRK2,ACTB,APP	Ex_3/4_down
												GO:BP	organic anion transport	GO:0015711	0.0237159	1.62496	532	53	6	18017	CCK,SNAP25,GRM7,NTRK2,PPFIA2,PSAP	Ex_3/4_down
												GO:BP	regulation of anion transport	GO:0044070	0.0238147	1.62315	114	53	3	18017	CCK,GRM7,PRNP	Ex_3/4_down
												GO:BP	response to metal ion	GO:0010038	0.0240261	1.61932	372	53	5	18017	CALM1,CALM3,PPP3CA,PRNP,APP	Ex_3/4_down
												GO:BP	regulation of cellular protein metabolic process	GO:0032268	0.0240261	1.61932	2763	53	16	18017	CCK,HSP90AA1,PEBP1,ENC1,CALM1,CALM3,PLCB1,HSP90AB1,NTRK2,THY1,PKM,ACTB,PRNP,PSAP,OXR1,APP	Ex_3/4_down
												GO:BP	regulation of response to stress	GO:0080134	0.0241655	1.6168	1546	53	11	18017	CCK,HSP90AA1,TMSB4X,PLCB1,HSP90AB1,PPP3CA,THY1,CLASP2,PSAP,OXR1,APP	Ex_3/4_down
												GO:BP	regulation of oxidoreductase activity	GO:0051341	0.0241655	1.6168	115	53	3	18017	HSP90AA1,CALM1,CALM3	Ex_3/4_down
												GO:BP	cellular transition metal ion homeostasis	GO:0046916	0.0241655	1.6168	115	53	3	18017	FTH1,PRNP,APP	Ex_3/4_down
												GO:BP	leukocyte activation involved in immune response	GO:0002366	0.0242803	1.61475	715	53	7	18017	HSP90AA1,FTH1,SNAP25,DYNLL1,HSP90AB1,PKM,PSAP	Ex_3/4_down
												GO:BP	protein depolymerization	GO:0051261	0.024634	1.60846	116	53	3	18017	STMN1,MAP1B,CLASP2	Ex_3/4_down
												GO:BP	positive regulation of transporter activity	GO:0032411	0.0251256	1.59988	117	53	3	18017	TMSB4X,CALM1,CALM3	Ex_3/4_down
												GO:BP	microtubule polymerization or depolymerization	GO:0031109	0.0251256	1.59988	117	53	3	18017	STMN1,MAP1B,CLASP2	Ex_3/4_down
												GO:BP	response to interleukin-4	GO:0070670	0.0252722	1.59736	36	53	2	18017	HSP90AB1,TUBA1B	Ex_3/4_down
												GO:BP	positive regulation of telomerase activity	GO:0051973	0.0252722	1.59736	36	53	2	18017	HSP90AA1,HSP90AB1	Ex_3/4_down
												GO:BP	release of sequestered calcium ion into cytosol by sarcoplasmic reticulum	GO:0014808	0.0252722	1.59736	36	53	2	18017	CALM1,CALM3	Ex_3/4_down
												GO:BP	central nervous system neuron axonogenesis	GO:0021955	0.0252722	1.59736	36	53	2	18017	HSP90AA1,HSP90AB1	Ex_3/4_down
												GO:BP	positive regulation of protein kinase activity	GO:0045860	0.0252722	1.59736	542	53	6	18017	HSP90AA1,CALM1,CALM3,HSP90AB1,NTRK2,PRNP	Ex_3/4_down
												GO:BP	regulation of phosphoprotein phosphatase activity	GO:0043666	0.0254116	1.59497	118	53	3	18017	CALM1,CALM3,HSP90AB1	Ex_3/4_down
												GO:BP	monovalent inorganic cation transport	GO:0015672	0.0254939	1.59356	544	53	6	18017	TMSB4X,SNAP25,YWHAH,KCND2,PRNP,KCNQ5	Ex_3/4_down
												GO:BP	peptidyl-tyrosine phosphorylation	GO:0018108	0.0257487	1.58924	381	53	5	18017	CCK,NTRK2,THY1,PRNP,APP	Ex_3/4_down
												GO:BP	peptidyl-threonine phosphorylation	GO:0018107	0.0258562	1.58744	119	53	3	18017	CALM1,CALM3,APP	Ex_3/4_down
												GO:BP	cellular response to organic substance	GO:0071310	0.0261994	1.58171	2797	53	16	18017	HSP90AA1,TMSB4X,MAP1B,PLCB1,VSNL1,YWHAH,HSP90AB1,PPP3CA,NTRK2,PKM,CHRM3,ACTB,PRNP,TUBA1B,PSAP,APP	Ex_3/4_down
												GO:BP	release of sequestered calcium ion into cytosol by endoplasmic reticulum	GO:1903514	0.0262884	1.58024	37	53	2	18017	CALM1,CALM3	Ex_3/4_down
												GO:BP	negative regulation of calcium ion transmembrane transporter activity	GO:1901020	0.0262884	1.58024	37	53	2	18017	CALM1,CALM3	Ex_3/4_down
												GO:BP	peptidyl-tyrosine modification	GO:0018212	0.0263389	1.5794	384	53	5	18017	CCK,NTRK2,THY1,PRNP,APP	Ex_3/4_down
												GO:BP	protein autophosphorylation	GO:0046777	0.0266797	1.57382	240	53	4	18017	CALM1,CALM3,NTRK2,THY1	Ex_3/4_down
												GO:BP	positive regulation of calcium ion transport	GO:0051928	0.0273728	1.56268	122	53	3	18017	CALM1,CALM3,THY1	Ex_3/4_down
												GO:BP	regulation of amino acid transport	GO:0051955	0.0274193	1.56194	38	53	2	18017	CCK,GRM7	Ex_3/4_down
												GO:BP	regulation of voltage-gated calcium channel activity	GO:1901385	0.0274193	1.56194	38	53	2	18017	CALM1,CALM3	Ex_3/4_down
												GO:BP	regulation of cellular component movement	GO:0051270	0.0278117	1.55577	1142	53	9	18017	RTN4,STMN1,TMSB4X,TMSB10,PLCB1,PPP3CA,THY1,CLASP2,APP	Ex_3/4_down
												GO:BP	positive regulation of neuron differentiation	GO:0045666	0.0278204	1.55564	392	53	5	18017	ENC1,MAP1B,NEFL,NTRK2,NEGR1	Ex_3/4_down
												GO:BP	positive regulation of calcium ion transmembrane transporter activity	GO:1901021	0.0278204	1.55564	39	53	2	18017	CALM1,CALM3	Ex_3/4_down
												GO:BP	positive regulation of protein localization to endoplasmic reticulum	GO:1905552	0.0278204	1.55564	2	53	1	18017	RTN4	Ex_3/4_down
												GO:BP	release of sequestered calcium ion into cytosol	GO:0051209	0.0278204	1.55564	124	53	3	18017	CALM1,CALM3,THY1	Ex_3/4_down
												GO:BP	corneocyte development	GO:0003335	0.0278204	1.55564	2	53	1	18017	PSAP	Ex_3/4_down
												GO:BP	smooth endoplasmic reticulum calcium ion homeostasis	GO:0051563	0.0278204	1.55564	2	53	1	18017	APP	Ex_3/4_down
												GO:BP	positive regulation of TORC2 signaling	GO:1904515	0.0278204	1.55564	2	53	1	18017	SIK3	Ex_3/4_down
												GO:BP	regulation of TORC2 signaling	GO:1903939	0.0278204	1.55564	2	53	1	18017	SIK3	Ex_3/4_down
												GO:BP	regulation of norepinephrine uptake	GO:0051621	0.0278204	1.55564	2	53	1	18017	ACTB	Ex_3/4_down
												GO:BP	trans-synaptic signaling by neuropeptide, modulating synaptic transmission	GO:0099551	0.0278204	1.55564	2	53	1	18017	NTRK2	Ex_3/4_down
												GO:BP	response to acrylamide	GO:1903937	0.0278204	1.55564	2	53	1	18017	NEFL	Ex_3/4_down
												GO:BP	galactosylceramide catabolic process	GO:0006683	0.0278204	1.55564	2	53	1	18017	PSAP	Ex_3/4_down
												GO:BP	intermediate filament polymerization or depolymerization	GO:0045105	0.0278204	1.55564	2	53	1	18017	NEFL	Ex_3/4_down
												GO:BP	cellular response to norepinephrine stimulus	GO:0071874	0.0278204	1.55564	2	53	1	18017	APP	Ex_3/4_down
												GO:BP	regulation of proton-transporting ATP synthase activity, rotational mechanism	GO:1905271	0.0278204	1.55564	2	53	1	18017	TMSB4X	Ex_3/4_down
												GO:BP	positive regulation of proton-transporting ATP synthase activity, rotational mechanism	GO:1905273	0.0278204	1.55564	2	53	1	18017	TMSB4X	Ex_3/4_down
												GO:BP	regulation of protein localization to endoplasmic reticulum	GO:1905550	0.0278204	1.55564	2	53	1	18017	RTN4	Ex_3/4_down
												GO:BP	regulation of cellular protein localization	GO:1903827	0.0278204	1.55564	557	53	6	18017	RTN4,HSP90AA1,YWHAH,HSP90AB1,ACTB,PRNP	Ex_3/4_down
												GO:BP	negative regulation of sequestering of calcium ion	GO:0051283	0.0280227	1.55249	125	53	3	18017	CALM1,CALM3,THY1	Ex_3/4_down
												GO:BP	negative regulation of intracellular signal transduction	GO:1902532	0.0280227	1.55249	562	53	6	18017	STMN1,TMSB4X,PEBP1,CALM1,CALM3,PRNP	Ex_3/4_down
												GO:BP	negative regulation of cellular protein metabolic process	GO:0032269	0.028076	1.55167	1151	53	9	18017	PEBP1,ENC1,CALM1,CALM3,HSP90AB1,THY1,PRNP,OXR1,APP	Ex_3/4_down
												GO:BP	potassium ion transport	GO:0006813	0.0288359	1.54007	249	53	4	18017	SNAP25,KCND2,PRNP,KCNQ5	Ex_3/4_down
												GO:BP	membrane organization	GO:0061024	0.0288687	1.53957	948	53	8	18017	RTN4,HSP90AA1,CALM1,CALM3,SNAP25,YWHAH,ACTB,PSAP	Ex_3/4_down
												GO:BP	memory	GO:0007613	0.0289603	1.5382	127	53	3	18017	CCK,PLCB1,PRNP	Ex_3/4_down
												GO:BP	regulation of sequestering of calcium ion	GO:0051282	0.0289603	1.5382	127	53	3	18017	CALM1,CALM3,THY1	Ex_3/4_down
												GO:BP	positive regulation of cell migration	GO:0030335	0.0293863	1.53186	569	53	6	18017	RTN4,TMSB4X,PPP3CA,THY1,CLASP2,APP	Ex_3/4_down
												GO:BP	peptidyl-threonine modification	GO:0018210	0.0294262	1.53127	128	53	3	18017	CALM1,CALM3,APP	Ex_3/4_down
												GO:BP	regulation of DNA binding	GO:0051101	0.0294262	1.53127	128	53	3	18017	TMSB4X,CALM1,CALM3	Ex_3/4_down
												GO:BP	negative regulation of insulin secretion	GO:0046676	0.0298867	1.52452	41	53	2	18017	VSNL1,PPP3CA	Ex_3/4_down
												GO:BP	activation of adenylate cyclase activity	GO:0007190	0.0298867	1.52452	41	53	2	18017	CALM1,CALM3	Ex_3/4_down
												GO:BP	skeletal muscle tissue regeneration	GO:0043403	0.0298867	1.52452	41	53	2	18017	PPP3CA,PKM	Ex_3/4_down
												GO:BP	regulation of protein kinase B signaling	GO:0051896	0.0303227	1.51823	254	53	4	18017	RTN4,HSP90AA1,HSP90AB1,NTRK2	Ex_3/4_down
												GO:BP	sequestering of calcium ion	GO:0051208	0.0304238	1.51679	130	53	3	18017	CALM1,CALM3,THY1	Ex_3/4_down
												GO:BP	response to copper ion	GO:0046688	0.0310881	1.50741	42	53	2	18017	PRNP,APP	Ex_3/4_down
												GO:BP	regulation of metal ion transport	GO:0010959	0.0310881	1.50741	407	53	5	18017	CALM1,CALM3,YWHAH,THY1,PRNP	Ex_3/4_down
												GO:BP	inorganic ion homeostasis	GO:0098771	0.0314032	1.50303	766	53	7	18017	CALM1,CALM3,CKB,FTH1,THY1,PRNP,APP	Ex_3/4_down
												GO:BP	cellular response to chemical stimulus	GO:0070887	0.0319405	1.49566	3419	53	18	18017	HSP90AA1,TMSB4X,MAP1B,PLCB1,VSNL1,YWHAH,HSP90AB1,PPP3CA,NTRK2,KCND2,PKM,CHRM3,ACTB,PRNP,TUBA1B,PSAP,OXR1,APP	Ex_3/4_down
												GO:BP	sarcoplasmic reticulum calcium ion transport	GO:0070296	0.032302	1.49077	43	53	2	18017	CALM1,CALM3	Ex_3/4_down
												GO:BP	positive regulation of embryonic development	GO:0040019	0.032302	1.49077	43	53	2	18017	PLCB1,CLASP2	Ex_3/4_down
												GO:BP	protein localization to organelle	GO:0033365	0.0325707	1.48717	973	53	8	18017	RTN4,HSP90AA1,CALM1,CALM3,SNAP25,YWHAH,HSP90AB1,PPP3CA	Ex_3/4_down
												GO:BP	regulation of muscle system process	GO:0090257	0.03313	1.47978	262	53	4	18017	CALM1,CALM3,PPP3CA,CHRM3	Ex_3/4_down
												GO:BP	immune response-regulating cell surface receptor signaling pathway involved in phagocytosis	GO:0002433	0.03313	1.47978	135	53	3	18017	HSP90AA1,HSP90AB1,ACTB	Ex_3/4_down
												GO:BP	Fc-gamma receptor signaling pathway involved in phagocytosis	GO:0038096	0.03313	1.47978	135	53	3	18017	HSP90AA1,HSP90AB1,ACTB	Ex_3/4_down
												GO:BP	regulation of T cell receptor signaling pathway	GO:0050856	0.0332829	1.47778	44	53	2	18017	THY1,PRNP	Ex_3/4_down
												GO:BP	positive regulation of calcium-mediated signaling	GO:0050850	0.0332829	1.47778	44	53	2	18017	CALM1,CALM3	Ex_3/4_down
												GO:BP	regulation of calcium ion transport	GO:0051924	0.0332829	1.47778	263	53	4	18017	CALM1,CALM3,THY1,PRNP	Ex_3/4_down
												GO:BP	negative regulation of calcium ion transmembrane transport	GO:1903170	0.0332829	1.47778	44	53	2	18017	CALM1,CALM3	Ex_3/4_down
												GO:BP	positive regulation of cell motility	GO:2000147	0.0337536	1.47168	591	53	6	18017	RTN4,TMSB4X,PPP3CA,THY1,CLASP2,APP	Ex_3/4_down
												GO:BP	cellular metal ion homeostasis	GO:0006875	0.0339613	1.46902	592	53	6	18017	CALM1,CALM3,FTH1,THY1,PRNP,APP	Ex_3/4_down
												GO:BP	negative regulation of organelle organization	GO:0010639	0.0340206	1.46826	419	53	5	18017	STMN1,TMSB4X,TMSB10,MAP1B,CLASP2	Ex_3/4_down
												GO:BP	regulation of cellular response to stress	GO:0080135	0.0342785	1.46498	783	53	7	18017	HSP90AA1,PLCB1,HSP90AB1,THY1,PSAP,OXR1,APP	Ex_3/4_down
												GO:BP	positive regulation of cellular protein metabolic process	GO:0032270	0.0342785	1.46498	1652	53	11	18017	CCK,HSP90AA1,CALM1,CALM3,PLCB1,HSP90AB1,NTRK2,PKM,PRNP,PSAP,APP	Ex_3/4_down
												GO:BP	cellular response to amyloid-beta	GO:1904646	0.0343885	1.46359	45	53	2	18017	PRNP,APP	Ex_3/4_down
												GO:BP	transition metal ion homeostasis	GO:0055076	0.034988	1.45608	139	53	3	18017	FTH1,PRNP,APP	Ex_3/4_down
												GO:BP	Fc-gamma receptor signaling pathway	GO:0038094	0.034988	1.45608	139	53	3	18017	HSP90AA1,HSP90AB1,ACTB	Ex_3/4_down
												GO:BP	regulation of protein metabolic process	GO:0051246	0.034988	1.45608	2917	53	16	18017	CCK,HSP90AA1,PEBP1,ENC1,CALM1,CALM3,PLCB1,HSP90AB1,NTRK2,THY1,PKM,ACTB,PRNP,PSAP,OXR1,APP	Ex_3/4_down
												GO:BP	regulation of embryonic development	GO:0045995	0.034988	1.45608	139	53	3	18017	PLCB1,SEPT7,CLASP2	Ex_3/4_down
												GO:BP	regulation of cell migration	GO:0030334	0.0350026	1.4559	991	53	8	18017	RTN4,TMSB4X,TMSB10,PLCB1,PPP3CA,THY1,CLASP2,APP	Ex_3/4_down
												GO:BP	regulation of cell cycle process	GO:0010564	0.0350026	1.4559	788	53	7	18017	HSP90AA1,CALM1,CALM3,PLCB1,DYNLL1,HSP90AB1,APP	Ex_3/4_down
												GO:BP	positive regulation of nitric oxide biosynthetic process	GO:0045429	0.0353005	1.45222	46	53	2	18017	HSP90AA1,HSP90AB1	Ex_3/4_down
												GO:BP	action potential	GO:0001508	0.0353005	1.45222	140	53	3	18017	YWHAH,NTRK2,KCND2	Ex_3/4_down
												GO:BP	protein insertion into mitochondrial membrane	GO:0051204	0.0353005	1.45222	46	53	2	18017	HSP90AA1,YWHAH	Ex_3/4_down
												GO:BP	eye photoreceptor cell differentiation	GO:0001754	0.0353005	1.45222	46	53	2	18017	NTRK2,THY1	Ex_3/4_down
												GO:BP	establishment of cell polarity	GO:0030010	0.03593	1.44454	141	53	3	18017	HSP90AA1,MAP1B,HSP90AB1	Ex_3/4_down
												GO:BP	positive regulation of locomotion	GO:0040017	0.0362169	1.44109	606	53	6	18017	RTN4,TMSB4X,PPP3CA,THY1,CLASP2,APP	Ex_3/4_down
												GO:BP	regulation of cell cycle	GO:0051726	0.0362169	1.44109	1223	53	9	18017	HSP90AA1,CALM1,CALM3,PLCB1,DYNLL1,HSP90AB1,ACTB,PRNP,APP	Ex_3/4_down
												GO:BP	activation of meiosis	GO:0090427	0.0362169	1.44109	3	53	1	18017	PLCB1	Ex_3/4_down
												GO:BP	positive regulation of vascular associated smooth muscle contraction	GO:1904695	0.0362169	1.44109	3	53	1	18017	CHRM3	Ex_3/4_down
												GO:BP	galactolipid catabolic process	GO:0019376	0.0362169	1.44109	3	53	1	18017	PSAP	Ex_3/4_down
												GO:BP	positive regulation of nitric oxide metabolic process	GO:1904407	0.0362169	1.44109	47	53	2	18017	HSP90AA1,HSP90AB1	Ex_3/4_down
												GO:BP	regulation of thrombin-activated receptor signaling pathway	GO:0070494	0.0362169	1.44109	3	53	1	18017	STMN1	Ex_3/4_down
												GO:BP	negative regulation of thrombin-activated receptor signaling pathway	GO:0070495	0.0362169	1.44109	3	53	1	18017	STMN1	Ex_3/4_down
												GO:BP	Fc receptor mediated stimulatory signaling pathway	GO:0002431	0.0362169	1.44109	142	53	3	18017	HSP90AA1,HSP90AB1,ACTB	Ex_3/4_down
												GO:BP	negative regulation of complement-dependent cytotoxicity	GO:1903660	0.0362169	1.44109	3	53	1	18017	HSP90AB1	Ex_3/4_down
												GO:BP	adult behavior	GO:0030534	0.0362169	1.44109	142	53	3	18017	NRXN3,OXR1,APP	Ex_3/4_down
												GO:BP	calcineurin-NFAT signaling cascade	GO:0033173	0.0362169	1.44109	48	53	2	18017	PPP3CA,PRNP	Ex_3/4_down
												GO:BP	regulation of protein autophosphorylation	GO:0031952	0.0362169	1.44109	48	53	2	18017	CALM1,CALM3	Ex_3/4_down
												GO:BP	regulation of intracellular calcium activated chloride channel activity	GO:1902938	0.0362169	1.44109	3	53	1	18017	PRNP	Ex_3/4_down
												GO:BP	negative regulation of protein-containing complex assembly	GO:0031333	0.0362169	1.44109	143	53	3	18017	STMN1,TMSB4X,TMSB10	Ex_3/4_down
												GO:BP	response to norepinephrine	GO:0071873	0.0362169	1.44109	3	53	1	18017	APP	Ex_3/4_down
												GO:BP	positive regulation of nucleotide metabolic process	GO:0045981	0.0362169	1.44109	48	53	2	18017	TMSB4X,APP	Ex_3/4_down
												GO:BP	positive regulation of purine nucleotide metabolic process	GO:1900544	0.0362169	1.44109	48	53	2	18017	TMSB4X,APP	Ex_3/4_down
												GO:BP	neurofilament bundle assembly	GO:0033693	0.0362169	1.44109	3	53	1	18017	NEFL	Ex_3/4_down
												GO:BP	protein unfolding	GO:0043335	0.0362169	1.44109	3	53	1	18017	HSP90AA1	Ex_3/4_down
												GO:BP	positive regulation of ATP-dependent microtubule motor activity, plus-end-directed	GO:2000582	0.0362169	1.44109	3	53	1	18017	DYNLL1	Ex_3/4_down
												GO:BP	synaptic signaling via neuropeptide	GO:0099538	0.0362169	1.44109	3	53	1	18017	NTRK2	Ex_3/4_down
												GO:BP	ERBB3 signaling pathway	GO:0038129	0.0362169	1.44109	3	53	1	18017	RTN4	Ex_3/4_down
												GO:BP	ERBB signaling pathway	GO:0038127	0.0362169	1.44109	144	53	3	18017	RTN4,HSP90AA1,APP	Ex_3/4_down
												GO:BP	trans-synaptic signaling by neuropeptide	GO:0099540	0.0362169	1.44109	3	53	1	18017	NTRK2	Ex_3/4_down
												GO:BP	mitochondrion localization	GO:0051646	0.0362169	1.44109	47	53	2	18017	MAP1B,NEFL	Ex_3/4_down
												GO:BP	postsynaptic intermediate filament cytoskeleton organization	GO:0099185	0.0362169	1.44109	3	53	1	18017	NEFL	Ex_3/4_down
												GO:BP	regulation of protein dephosphorylation	GO:0035304	0.0362169	1.44109	143	53	3	18017	CALM1,CALM3,HSP90AB1	Ex_3/4_down
												GO:BP	regulation of filopodium assembly	GO:0051489	0.0362169	1.44109	47	53	2	18017	GPM6A,TENM2	Ex_3/4_down
												GO:BP	regulation of ATP-dependent microtubule motor activity, plus-end-directed	GO:2000580	0.0362169	1.44109	3	53	1	18017	DYNLL1	Ex_3/4_down
												GO:BP	negative regulation of peptide hormone secretion	GO:0090278	0.0362169	1.44109	47	53	2	18017	VSNL1,PPP3CA	Ex_3/4_down
												GO:BP	regulation of embryonic cell shape	GO:0016476	0.0362169	1.44109	3	53	1	18017	2021-09-07	Ex_3/4_down
												GO:BP	negative regulation of phosphate metabolic process	GO:0045936	0.0364886	1.43784	612	53	6	18017	PEBP1,CALM1,CALM3,DYNLL1,THY1,PRNP	Ex_3/4_down
												GO:BP	negative regulation of phosphorus metabolic process	GO:0010563	0.0367057	1.43527	613	53	6	18017	PEBP1,CALM1,CALM3,DYNLL1,THY1,PRNP	Ex_3/4_down
												GO:BP	protein kinase B signaling	GO:0043491	0.0367787	1.4344	278	53	4	18017	RTN4,HSP90AA1,HSP90AB1,NTRK2	Ex_3/4_down
												GO:BP	positive regulation of ATP metabolic process	GO:1903580	0.0371211	1.43038	49	53	2	18017	TMSB4X,APP	Ex_3/4_down
												GO:BP	presynapse organization	GO:0099172	0.0371211	1.43038	49	53	2	18017	PPFIA2,APP	Ex_3/4_down
												GO:BP	photoreceptor cell development	GO:0042461	0.0371211	1.43038	49	53	2	18017	NTRK2,THY1	Ex_3/4_down
												GO:BP	regulation of telomerase activity	GO:0051972	0.0371211	1.43038	49	53	2	18017	HSP90AA1,HSP90AB1	Ex_3/4_down
												GO:BP	visual learning	GO:0008542	0.0371211	1.43038	49	53	2	18017	CCK,APP	Ex_3/4_down
												GO:BP	regulation of postsynaptic membrane potential	GO:0060078	0.0374617	1.42641	147	53	3	18017	PPP3CA,KCND2,APP	Ex_3/4_down
												GO:BP	cardiac conduction	GO:0061337	0.0374617	1.42641	147	53	3	18017	CALM1,CALM3,KCND2	Ex_3/4_down
												GO:BP	nitrogen compound transport	GO:0071705	0.0375218	1.42572	2440	53	14	18017	CCK,HSP90AA1,SNAP25,DYNLL1,VSNL1,YWHAH,HSP90AB1,PPP3CA,GRM7,NTRK2,PPFIA2,ACTB,PRNP,PSAP	Ex_3/4_down
												GO:BP	positive regulation of kinase activity	GO:0033674	0.0375218	1.42572	618	53	6	18017	HSP90AA1,CALM1,CALM3,HSP90AB1,NTRK2,PRNP	Ex_3/4_down
												GO:BP	non-canonical Wnt signaling pathway	GO:0035567	0.0379703	1.42056	148	53	3	18017	CALM1,PLCB1,PPP3CA	Ex_3/4_down
												GO:BP	neuron recognition	GO:0008038	0.0382159	1.41776	50	53	2	18017	RTN4,APP	Ex_3/4_down
												GO:BP	regulation of G protein-coupled receptor signaling pathway	GO:0008277	0.0385445	1.41404	149	53	3	18017	STMN1,CALM1,PLCB1	Ex_3/4_down
												GO:BP	cell division	GO:0051301	0.0386602	1.41274	623	53	6	18017	STMN1,CALM1,CALM3,SEPT7,CLASP2,TUBA1B	Ex_3/4_down
												GO:BP	regulation of actin filament organization	GO:0110053	0.0386602	1.41274	284	53	4	18017	STMN1,TMSB4X,TMSB10,CLASP2	Ex_3/4_down
												GO:BP	response to glucocorticoid	GO:0051384	0.0388688	1.4104	150	53	3	18017	CALM1,CALM3,NEFL	Ex_3/4_down
												GO:BP	response to calcium ion	GO:0051592	0.0388688	1.4104	150	53	3	18017	CALM1,CALM3,PPP3CA	Ex_3/4_down
												GO:BP	positive regulation of signal transduction	GO:0009967	0.0388688	1.4104	1706	53	11	18017	RTN4,HSP90AA1,CALM1,CALM3,PLCB1,YWHAH,HSP90AB1,SIK3,NTRK2,PSAP,APP	Ex_3/4_down
												GO:BP	dendrite morphogenesis	GO:0048813	0.0388688	1.4104	150	53	3	18017	YWHAH,PPP3CA,PPFIA2	Ex_3/4_down
												GO:BP	regulation of microtubule polymerization	GO:0031113	0.0391874	1.40685	51	53	2	18017	STMN1,MAP1B	Ex_3/4_down
												GO:BP	negative regulation of protein phosphorylation	GO:0001933	0.0393362	1.40521	447	53	5	18017	PEBP1,CALM1,CALM3,THY1,PRNP	Ex_3/4_down
												GO:BP	regulation of protein stability	GO:0031647	0.0404345	1.39325	289	53	4	18017	RTN4,HSP90AA1,HSP90AB1,PRNP	Ex_3/4_down
												GO:BP	axon regeneration	GO:0031103	0.0404345	1.39325	52	53	2	18017	MAP1B,NEFL	Ex_3/4_down
												GO:BP	calcineurin-mediated signaling	GO:0097720	0.0404345	1.39325	52	53	2	18017	PPP3CA,PRNP	Ex_3/4_down
												GO:BP	cellular response to nerve growth factor stimulus	GO:1990090	0.0418564	1.37824	53	53	2	18017	NTRK2,APP	Ex_3/4_down
												GO:BP	retina development in camera-type eye	GO:0060041	0.042	1.37675	155	53	3	18017	NTRK2,THY1,GPM6A	Ex_3/4_down
												GO:BP	positive regulation of developmental process	GO:0051094	0.0420682	1.37605	1492	53	10	18017	RTN4,ENC1,MAP1B,PLCB1,HSP90AB1,NEFL,NTRK2,PKM,CLASP2,NEGR1	Ex_3/4_down
												GO:BP	positive regulation of oxidoreductase activity	GO:0051353	0.0430396	1.36613	54	53	2	18017	CALM1,CALM3	Ex_3/4_down
												GO:BP	visual behavior	GO:0007632	0.0430396	1.36613	54	53	2	18017	CCK,APP	Ex_3/4_down
												GO:BP	negative regulation of cation channel activity	GO:2001258	0.0430396	1.36613	54	53	2	18017	CALM1,CALM3	Ex_3/4_down
												GO:BP	regulation of dendrite development	GO:0050773	0.0431334	1.36519	157	53	3	18017	YWHAH,PPP3CA,PPFIA2	Ex_3/4_down
												GO:BP	second-messenger-mediated signaling	GO:0019932	0.0433774	1.36274	460	53	5	18017	CALM1,CALM3,PPP3CA,CHRM3,PRNP	Ex_3/4_down
												GO:BP	regulation of cell motility	GO:2000145	0.0436517	1.36	1052	53	8	18017	RTN4,TMSB4X,TMSB10,PLCB1,PPP3CA,THY1,CLASP2,APP	Ex_3/4_down
												GO:BP	positive regulation of cell morphogenesis involved in differentiation	GO:0010770	0.0436698	1.35982	158	53	3	18017	MAP1B,NEFL,NTRK2	Ex_3/4_down
												GO:BP	positive regulation of protein metabolic process	GO:0051247	0.0438218	1.35831	1742	53	11	18017	CCK,HSP90AA1,CALM1,CALM3,PLCB1,HSP90AB1,NTRK2,PKM,PRNP,PSAP,APP	Ex_3/4_down
												GO:BP	cellular calcium ion homeostasis	GO:0006874	0.04386	1.35793	462	53	5	18017	CALM1,CALM3,THY1,PRNP,APP	Ex_3/4_down
												GO:BP	microglia development	GO:0014005	0.0443502	1.3531	4	53	1	18017	APP	Ex_3/4_down
[truncated: 2,221 more rows]

## Sheet: Supplementary Table 8
Supplementary Table 8: Enriched disease pathways in APOE3/3 cells in the Entorhinal cortex
[truncated: 1,868 more rows]

[truncated: 1 more sheets: Supplementary Table 9]
